# Supplementary material for: Control of the C. albicans Cell Wall Damage Response by Transcriptional Regulator Cas5
Source: PLOS journal article supplement (doi:10.1371/journal.ppat.0020021), 2006-03-10
Supplement: S1 (10.1371/journal.ppat.0020021.s001) [file 10.1371_journal.ppat.0020021.sd001.xls]

## Sheet: Legend
Sheet 1:
Gene ID refers to the Genome Assembly 19 Orf number; Gene symbol refers to the corresponding entry at CandidaDB.
R values are log2 (Expression ratio): the log2 of the ratio of expression in the untreated wild type strain versus the treated wild type strain (wt-/wt+) or in each treated mutant versus the treated wild type strain (ada2/wt+; cas5/wt+, rlm1/wt+). A negative number indicates that the gene was expressed at higher levels in the treated wild type strain than in the compared strain or condition.
Cluster refers to the row of the entry in the cluster diagram below.
Sheet 2:
Gene ID refers to the Genome Assembly 19 Orf number; Gene symbol refers to the corresponding entry at CandidaDB.
S. cerevisiae homologs were chosen as the best Blastp match listed at CandidaDB.
R values are log2 (Expression ratio): the log2 of the ratio of expression in the untreated wild type strain versus the treated wild type strain (wt-/wt+) or in each treated mutant versus the treated wild type strain (ada2/wt+; cas5/wt+, rlm1/wt+). A negative number indicates that the gene was expressed at higher levels in the treated wild type strain than in the compared strain or condition.
Rogers R values: Data for C. albicans genes from Liu et al. 2005 was averaged for the two experiments and expressed as log2 (Expression ratio). A blank entry indicates that no data were provided.
Kuchler R values: Mean data for S. cerevisiae homologs from Reinoso-Martin et al. 2003 was expressed as log2 (Expression ratio). A blank entry indicates that no data were provided.
Clark R values: Data for S. cerevisiae homologs from Agarwal et al. 2003 was averaged for the three experiments and expressed as log2 (Expression ratio). A blank entry indicates that no data were provided.
Sheet 3:
Gene ID refers to the Genome Assembly 19 Orf number; Gene symbol refers to the corresponding entry at CandidaDB.
R values are log2 (Expression ratio): the log2 of the ratio of expression in the untreated wild type strain versus the treated wild type strain (wt-/wt+) or in each treated mutant versus the treated wild type strain (ada2/wt+; cas5/wt+, rlm1/wt+). A negative number indicates that the gene was expressed at higher levels in the treated wild type strain than in the compared strain or condition.
Cluster refers to the row of the entry in the cluster diagram below.
Sheet 4:
All original data are shown for all experiments. ID refers to the Qiagen oligonuceotide number and Name refers to the reference gene or sequence specified by Qiagen. Detailed information for each oligonucleotide is available from http://omad.operon.com/candida/index.php
Each experiment is designated by a number in parentheses in the header row, and the signal intensities are listed for the two respective samples. A negative entry in the Flags column indicates that the spot was not usable.
Abbreviations:
wt +		Wild type strain with caspofungin treatment
wt -		Wild type strain without caspofungin treatment
cas3d +	ada2/ada2 strain with caspofungin treatment
cas5d +	cas5/cas5 strain with caspofungin treatment
rlm1d +	rlm1/rlm1 strain with caspofungin treatment

## Sheet: 1. All vs wt+ (p<0.05, R<>4)
Gene ID	##	ID	R(cas3/wt+)	R(cas5/wt+)	R(rlm1d/wt+)	R(wt-/wt+)	rawp	Bonferroni	Cluster	Oligo_ID	Gene symbol	CandidaDB accession	Description	Sequence	Xhyb report	BLAST gene homology image	CandidaDB	CGD
orf19.11755	1377	CA01775_01	-4.27864	-1.82762	-0.420305	-6.32651	7.91855e-12	5.47331e-08	1	CA01775_01	IPF8746	CA1548	putative alpha-1,3-mannosyltransferase (by homology)	Sequence	Oligo report	Gene image	CandidaDB	http://www.candidagenome.org/cgi-bin/locus.pl?locus=orf19.11755
orf19.4082	4150	CA04361_01	-2.18122	-1.70032	0.313148	-6.25065	0	0	141	CA04361_01	CaDDR48	CA4336	stress protein (by homology)	Sequence	Oligo report	Gene image	CandidaDB	http://www.candidagenome.org/cgi-bin/locus.pl?locus=orf19.4082
orf19.8292	1980	CA04133_01	-2.50678	-1.72342	0.315734	-6.09064	0	0	140	CA04133_01	IPF3964	CA4111	unknown function	Sequence	Oligo report	Gene image	CandidaDB	http://www.candidagenome.org/cgi-bin/locus.pl?locus=orf19.8292
orf19.711	3082	CA01500_01	-3.52004	-1.89958	0.139042	-5.98199	0	0	119	CA01500_01	IPF18732	CA1234	histidine-rich glycoprotein precursor (by homology)	Sequence	Oligo report	Gene image	CandidaDB	http://www.candidagenome.org/cgi-bin/locus.pl?locus=orf19.711
orf19.711	4502	CA00558_01	-3.55131	-1.73048	0.316855	-5.75426	0	0	120	CA00558_01	NULL		NULL	Sequence	Oligo report	Gene image	CandidaDB	http://www.candidagenome.org/cgi-bin/locus.pl?locus=orf19.711
orf19.753	1393	CA02118_01	-1.92943	-2.44137	-0.389976	-5.49238	0	0	53	CA02118_01	IPF13407	CA1926	Unknown function	Sequence	Oligo report	Gene image	CandidaDB	http://www.candidagenome.org/cgi-bin/locus.pl?locus=orf19.753
orf19.2061	2035	CA04907_01	-5.45638	-1.30072	-0.0129324	-5.22051	0	0	3	CA04907_01	NULL		NULL	Sequence	Oligo report	Gene image	CandidaDB	http://www.candidagenome.org/cgi-bin/locus.pl?locus=orf19.2061
orf19.6595	1090	CA03865_01	-4.27964	-1.97856	-0.0278017	-5.00779	0	0	51	CA03865_01	CaRTA4	CA3835	Protein involved in 7-aminocholesterol resistance (by homology)	Sequence	Oligo report	Gene image	CandidaDB	http://www.candidagenome.org/cgi-bin/locus.pl?locus=orf19.6595
orf19.11225	6656	CA03317_01	2.96508	-0.625858	-0.423184	-4.27589	0	0	93	CA03317_01	IPF4724	CA3253	unknown Function	Sequence	Oligo report	Gene image	CandidaDB	http://www.candidagenome.org/cgi-bin/locus.pl?locus=orf19.11225
orf19.3932	3052	CA01115_01	-1.60864	-1.44129	-0.19786	-4.27144	0	0	118	CA01115_01	IPF16253	CA0782	unknown function	Sequence	Oligo report	Gene image	CandidaDB	http://www.candidagenome.org/cgi-bin/locus.pl?locus=orf19.3932
orf19.7351	4238	CA05804_01	-1.0202	-0.792952	0.0715178	-4.14779	0	0	148	CA05804_01	NULL		NULL	Sequence	Oligo report	Gene image	CandidaDB	http://www.candidagenome.org/cgi-bin/locus.pl?locus=orf19.7351
orf19.3282	2073	CA05603_01	-0.839606	-0.429326	0.0829866	-4.13933	0	0	84	CA05603_01	IPF300	CA5470	unknown function	Sequence	Oligo report	Gene image	CandidaDB	http://www.candidagenome.org/cgi-bin/locus.pl?locus=orf19.3282
orf19.7350	781	CA05803_01	-1.85465	-1.66589	0.108434	-4.09714	0	0	147	CA05803_01	IPF7109	CA5650	unknown function	Sequence	Oligo report	Gene image	CandidaDB	http://www.candidagenome.org/cgi-bin/locus.pl?locus=orf19.7350
orf19.7330	3806	CA05713_01	-1.09191	-0.941135	0.408956	-4.08493	0	0	136	CA05713_01	CaPET18	CA5566	Putative transcriptional regulator (by homology)	Sequence	Oligo report	Gene image	CandidaDB	http://www.candidagenome.org/cgi-bin/locus.pl?locus=orf19.7330
orf19.6840	1995	CA04474_01	-2.1268	-0.961567	0.205676	-3.74878	0	0	102	CA04474_01	IPF3535	CA4443	unknown function	Sequence	Oligo report	Gene image	CandidaDB	http://www.candidagenome.org/cgi-bin/locus.pl?locus=orf19.6840
orf19.13071	1449	CA02867_01	-1.76097	-2.06646	-0.151811	-3.72966	0	0	131	CA02867_01	IPF15013	CA2761	pyruvate decarboxylase regulatory protein (by homology)	Sequence	Oligo report	Gene image	CandidaDB	http://www.candidagenome.org/cgi-bin/locus.pl?locus=orf19.13071
orf19.5741	3859	CA00440_01	-4.5584	-2.08017	0.364857	-3.66841	0	0	139	CA00440_01	CaALS1.3eoc	CA0316	agglutinin-like protein, 3-prime end	Sequence	Oligo report		CandidaDB	http://www.candidagenome.org/cgi-bin/locus.pl?locus=orf19.5741
orf19.246	5832	CA00580_01	-0.984384	-0.863907	0.105051	-3.57596	0	0	46	CA00580_01	IPF10495	CA0129	unknown function	Sequence	Oligo report	Gene image	CandidaDB	http://www.candidagenome.org/cgi-bin/locus.pl?locus=orf19.246
orf19.342	708	CA04685_01	-0.0966059	-1.32683	0.0362505	-3.41086	0	0	38	CA04685_01	IPF1520	CA4636	unknown function	Sequence	Oligo report	Gene image	CandidaDB	http://www.candidagenome.org/cgi-bin/locus.pl?locus=orf19.342
orf19.2049	2369	CA03701_01	-1.77151	-2.12162	0.847631	-3.40123	0	0	52	CA03701_01	IPF7459	CA3657	unknown function	Sequence	Oligo report	Gene image	CandidaDB	http://www.candidagenome.org/cgi-bin/locus.pl?locus=orf19.2049
orf19.4391	658	CA03946_01	0.114929	-1.2215	0.590615	-3.38192	0	0	39	CA03946_01	IPF3292	CA3911	unknown function	Sequence	Oligo report	Gene image	CandidaDB	http://www.candidagenome.org/cgi-bin/locus.pl?locus=orf19.4391
orf19.6877	3737	CA04613_01	-1.70828	-0.714857	0.2767	-3.35059	0	0	130	CA04613_01	IPF19801	CA4566	unknown function	Sequence	Oligo report	Gene image	CandidaDB	http://www.candidagenome.org/cgi-bin/locus.pl?locus=orf19.6877
orf19.5282	1592	CA05059_01	-5.65575	-1.75105	0.265055	-3.33262	0	0	2	CA05059_01	IPF4696	CA4970	unknown Function	Sequence	Oligo report	Gene image	CandidaDB	http://www.candidagenome.org/cgi-bin/locus.pl?locus=orf19.5282
orf19.6928	5197	CA10090_01	-1.28367	-0.535499	0.269928	-3.31997	0	0	129	CA10090_01	CaSAP9	CA4700	aspartyl proteinase 9 (by homology)	Sequence	Oligo report		CandidaDB	http://www.candidagenome.org/cgi-bin/locus.pl?locus=orf19.6928
orf19.6637	5428	CA04104_01	-0.678507	-1.26354	0.674897	-3.2249	1.47474e-08	0.000101934	35	CA04104_01	IPF2523	CA4081	unknown function	Sequence	Oligo report	Gene image	CandidaDB	http://www.candidagenome.org/cgi-bin/locus.pl?locus=orf19.6637
orf19.7329	349	CA05712_01	-1.12911	-1.25554	0.194811	-3.12511	0	0	135	CA05712_01	CaQRI8	CA5565	E2 ubiquitin-conjugation enzyme (by homology)	Sequence	Oligo report	Gene image	CandidaDB	http://www.candidagenome.org/cgi-bin/locus.pl?locus=orf19.7329
orf19.6920	1150	CA04648_01	-2.89099	-1.32597	-0.383646	-3.1103	0	0	86	CA04648_01	IPF2195	CA4601	unknown function	Sequence	Oligo report	Gene image	CandidaDB	http://www.candidagenome.org/cgi-bin/locus.pl?locus=orf19.6920
orf19.7054	5097	CA05794_01	-2.29003	-0.827251	-0.139804	-2.98024	0	0	50	CA05794_01	NULL		NULL	Sequence	Oligo report	Gene image	CandidaDB	http://www.candidagenome.org/cgi-bin/locus.pl?locus=orf19.7054
orf19.7445	2508	CA05883_01	-1.38655	-0.695856	0.187434	-2.91709	0	0	134	CA05883_01	IPF2878	CA5735	unknown function	Sequence	Oligo report	Gene image	CandidaDB	http://www.candidagenome.org/cgi-bin/locus.pl?locus=orf19.7445
orf19.7339	3810	CA05721_01	-1.72563	-0.703565	0.449884	-2.87579	4.44089e-16	3.06954e-12	48	CA05721_01	CaBGL22	CA5572	endo-beta-1,3-glucanase (by homology)	Sequence	Oligo report	Gene image	CandidaDB	http://www.candidagenome.org/cgi-bin/locus.pl?locus=orf19.7339
orf19.14177	1144	CA04624_01	0.149643	-0.885562	-0.344889	-2.74525	1.46028e-09	1.00934e-05	40	CA04624_01	IPF9425.3	CA4576	unknown function, 3-prime end	Sequence	Oligo report	Gene image	CandidaDB	http://www.candidagenome.org/cgi-bin/locus.pl?locus=orf19.14177
orf19.4255	6183	CA02342_01	-0.755656	-1.54143	0.073138	-2.69987	0	0	107	CA02342_01	CaECM331	CA2181	Involved in cell wall biogenesis and architecture (by homology)	Sequence	Oligo report	Gene image	CandidaDB	http://www.candidagenome.org/cgi-bin/locus.pl?locus=orf19.4255
orf19.5459	2096	CA05965_01	0.0388214	0.426385	0.0343591	-2.63069	0	0	108	CA05965_01	IPF4160	CA5804	unknown function	Sequence	Oligo report	Gene image	CandidaDB	http://www.candidagenome.org/cgi-bin/locus.pl?locus=orf19.5459
orf19.5302	2076	CA05609_01	1.30727	0.598547	-2.49851	-2.59688	0	0	94	CA05609_01	NULL		NULL	Sequence	Oligo report	Gene image	CandidaDB	http://www.candidagenome.org/cgi-bin/locus.pl?locus=orf19.5302
orf19.6339	2352	CA03362_01	-0.565458	0.405687	0.207828	-2.59035	3.28483e-06	0.0227047	37	CA03362_01	NULL		NULL	Sequence	Oligo report	Gene image	CandidaDB	http://www.candidagenome.org/cgi-bin/locus.pl?locus=orf19.6339
orf19.5995	3394	CA06255_01	0.773435	-0.830485	-0.335	-2.5794	0	0	96	CA06255_01	IPF4847	CA6069	unknown function	Sequence	Oligo report	Gene image	CandidaDB	http://www.candidagenome.org/cgi-bin/locus.pl?locus=orf19.5995
orf19.2190	1843	CA01990_01	0.746501	0.273997	-0.0514839	-2.53024	0	0	79	CA01990_01	CaVRP1	CA1773	verprolin (by homology)	Sequence	Oligo report	Gene image	CandidaDB	http://www.candidagenome.org/cgi-bin/locus.pl?locus=orf19.2190
orf19.9467	4648	CA00625_01	-0.840774	-1.02846	-0.268784	-2.50941	0	0	132	CA00625_01	IPF15442	CA0188	unknown function	Sequence	Oligo report	Gene image	CandidaDB	http://www.candidagenome.org/cgi-bin/locus.pl?locus=orf19.9467
orf19.7504	2108	CA06011_01	-2.47953	-1.72846	0.380675	-2.47516	0	0	83	CA06011_01	IPF407	CA5848	unknown function	Sequence	Oligo report	Gene image	CandidaDB	http://www.candidagenome.org/cgi-bin/locus.pl?locus=orf19.7504
orf19.7359	4242	CA05812_01	-3.04294	-0.813954	-0.0289975	-2.45853	0	0	115	CA05812_01	IPF14682	CA5657	putative transcription factor (by homology)	Sequence	Oligo report	Gene image	CandidaDB	http://www.candidagenome.org/cgi-bin/locus.pl?locus=orf19.7359
orf19.2726	1362	CA01435_01	-2.69753	-1.35636	0.0247118	-2.45665	1.1354e-08	7.84788e-05	92	CA01435_01	IPF10262	CA1160	unknown function	Sequence	Oligo report	Gene image	CandidaDB	http://www.candidagenome.org/cgi-bin/locus.pl?locus=orf19.2726
orf19.4043	3162	CA02623_01	-0.6466	-0.698369	-0.606178	-2.40469	0	0	90	CA02623_01	IPF7217	CA2489	unknown function	Sequence	Oligo report	Gene image	CandidaDB	http://www.candidagenome.org/cgi-bin/locus.pl?locus=orf19.4043
orf19.3127	3864	CA00385_01	-1.46789	-0.307585	0.321501	-2.40151	1.18305e-12	8.17727e-09	82	CA00385_01	CaCZF1	CA3560	Candida zinc finger protein	Sequence	Oligo report		CandidaDB	http://www.candidagenome.org/cgi-bin/locus.pl?locus=orf19.3127
orf19.6864	2001	CA04497_01	-1.11065	0.0707796	-0.183361	-2.38837	0	0	100	CA04497_01	IPF9833	CA4467	unknown function	Sequence	Oligo report	Gene image	CandidaDB	http://www.candidagenome.org/cgi-bin/locus.pl?locus=orf19.6864
orf19.3615	3113	CA01894_01	-2.09936	-1.39531	-0.375991	-2.3844	0	0	89	CA01894_01	IPF5192	CA1675	unknown function	Sequence	Oligo report	Gene image	CandidaDB	http://www.candidagenome.org/cgi-bin/locus.pl?locus=orf19.3615
orf19.5437	5548	CA05946_01	-1.25563	0.283045	1.18093	-2.37326	4.98144e-10	3.44317e-06	109	CA05946_01	CARHR2	CA5788	DL-glycerol phosphatase	Sequence	Oligo report	Gene image	CandidaDB	http://www.candidagenome.org/cgi-bin/locus.pl?locus=orf19.5437
orf19.12512	6575	CA01917_01	0.226507	-0.7587	-0.874899	-2.34921	0	0	43	CA01917_01	IPF15681	CA1698	unknown function	Sequence	Oligo report	Gene image	CandidaDB	http://www.candidagenome.org/cgi-bin/locus.pl?locus=orf19.12512
orf19.1727	6560	CA01866_01	0.495943	-1.09431	0.0666057	-2.33987	0	0	126	CA01866_01	CaPMC1	CA1645	Ca2+-transporting P-type ATPase (by homology)	Sequence	Oligo report	Gene image	CandidaDB	http://www.candidagenome.org/cgi-bin/locus.pl?locus=orf19.1727
orf19.6398	6452	CA00288_01	-0.0158379	-0.484896	1.00729	-2.33818	0	0	128	CA00288_01	NULL		Wh11=white colony-forming gene {white-opaque switching system}	Sequence	Oligo report		CandidaDB	http://www.candidagenome.org/cgi-bin/locus.pl?locus=orf19.6398
orf19.7131	1199	CA05389_01	1.78633	0.233632	-0.0980365	-2.33411	1.56915e-07	0.0010846	42	CA05389_01	IPF1899	CA5280	unknown function	Sequence	Oligo report	Gene image	CandidaDB	http://www.candidagenome.org/cgi-bin/locus.pl?locus=orf19.7131
orf19.6420	2905	CA05220_01	2.05955	-3.04231	-1.46211	-2.32471	0	0	122	CA05220_01	IPF1341	CA5112	Similarity to mucin proteins (by homology)	Sequence	Oligo report	Gene image	CandidaDB	http://www.candidagenome.org/cgi-bin/locus.pl?locus=orf19.6420
orf19.1618	3858	CA10289_01	-1.57433	-0.0196031	-0.386532	-2.31549	5.73475e-11	3.96386e-07	138	CA10289_01	CaGFA1	CA4016	glutamine:fructose-6-phosphateamidotransferase	Sequence	Oligo report		CandidaDB	http://www.candidagenome.org/cgi-bin/locus.pl?locus=orf19.1618
orf19.11659	1955	CA03767_01	0.594908	-0.480271	0.0457884	-2.30949	0	0	80	CA03767_01	IPF11897	CA3733	unknown function	Sequence	Oligo report	Gene image	CandidaDB	http://www.candidagenome.org/cgi-bin/locus.pl?locus=orf19.11659
orf19.6101	4553	CA03890_01	-0.864658	0.553868	-0.197768	-2.30674	0	0	49	CA03890_01	NULL		NULL	Sequence	Oligo report	Gene image	CandidaDB	http://www.candidagenome.org/cgi-bin/locus.pl?locus=orf19.6101
orf19.6844	1997	CA04478_01	0.0277829	-0.513129	0.323037	-2.28859	2.2871e-11	1.58085e-07	34	CA04478_01	CaICL1	CA4446	Isocitrate lyase	Sequence	Oligo report	Gene image	CandidaDB	http://www.candidagenome.org/cgi-bin/locus.pl?locus=orf19.6844
orf19.2706	2173	CA00784_01	0.00232553	-1.93894	-0.694273	-2.26525	0	0	127	CA00784_01	CaCRH11	CA0375	Probable membrane protein (by homology)	Sequence	Oligo report	Gene image	CandidaDB	http://www.candidagenome.org/cgi-bin/locus.pl?locus=orf19.2706
orf19.951	5942	CA05531_01	-1.72722	-0.39836	0.161296	-2.25128	4.8342e-11	3.3414e-07	47	CA05531_01	IPF1548	CA5407	unknown function	Sequence	Oligo report	Gene image	CandidaDB	http://www.candidagenome.org/cgi-bin/locus.pl?locus=orf19.951
orf19.7531	362	CA06033_01	1.56738	-1.07985	-0.214735	-2.24245	0	0	95	CA06033_01	IPF351	CA5868	unknown function	Sequence	Oligo report	Gene image	CandidaDB	http://www.candidagenome.org/cgi-bin/locus.pl?locus=orf19.7531
orf19.5799	5444	CA04171_01	-1.78474	-0.0275875	0.495905	-2.2359	0	0	104	CA04171_01	IPF20010	CA4154	unknown function	Sequence	Oligo report	Gene image	CandidaDB	http://www.candidagenome.org/cgi-bin/locus.pl?locus=orf19.5799
orf19.4377	3862	CA00380_01	-0.602794	-0.499496	0.222802	-2.23156	1.69824e-09	1.17383e-05	110	CA00380_01	CaKRE1	CA2589	secretory pathway protein	Sequence	Oligo report		CandidaDB	http://www.candidagenome.org/cgi-bin/locus.pl?locus=orf19.4377
orf19.909	5317	CA02326_01	-0.917098	-0.150066	0.255464	-2.17606	0	0	103	CA02326_01	IPF4553	CA2167	unknown function	Sequence	Oligo report	Gene image	CandidaDB	http://www.candidagenome.org/cgi-bin/locus.pl?locus=orf19.909
orf19.3298	4154	CA04654_01	-1.18637	-0.304981	0.304836	-2.17357	0	0	105	CA04654_01	CaCCH1	CA4608	Calcium channel protein (by homology)	Sequence	Oligo report	Gene image	CandidaDB	http://www.candidagenome.org/cgi-bin/locus.pl?locus=orf19.3298
orf19.6527	1586	CA05035_01	0.602285	-1.16886	-0.175976	-2.17141	6.00435e-10	4.15021e-06	91	CA05035_01	IPF13607	CA4951	unknown function	Sequence	Oligo report	Gene image	CandidaDB	http://www.candidagenome.org/cgi-bin/locus.pl?locus=orf19.6527
orf19.6081	5194	CA10124_01	0.253493	-1.07374	0.684549	-2.16705	1.53954e-08	0.000106413	137	CA10124_01	CaPHR2	CA3867	pH-regulated protein 2	Sequence	Oligo report		CandidaDB	http://www.candidagenome.org/cgi-bin/locus.pl?locus=orf19.6081
orf19.12077	2061	CA05283_01	0.270784	-0.160669	-0.0854997	-2.12911	0	0	44	CA05283_01	IPF6032	CA5168	unknown function	Sequence	Oligo report	Gene image	CandidaDB	http://www.candidagenome.org/cgi-bin/locus.pl?locus=orf19.12077
orf19.4135	2215	CA01482_01	1.05019	-0.615453	0.00462907	-2.12176	0	0	45	CA01482_01	CaPRC2	CA1219	carboxypeptidase y precursor , serine-type protease (by homology)	Sequence	Oligo report	Gene image	CandidaDB	http://www.candidagenome.org/cgi-bin/locus.pl?locus=orf19.4135
orf19.6139	196	CA03469_01	-1.98102	-0.128728	0.249452	-2.09106	0	0	116	CA03469_01	CaFRE30.3	CA3416	Strong similarity to ferric reductase Fre2p, 3-prime end (by homology)	Sequence	Oligo report	Gene image	CandidaDB	http://www.candidagenome.org/cgi-bin/locus.pl?locus=orf19.6139
orf19.6658	4131	CA04289_01	-0.496026	-0.136037	0.127491	-2.05414	7.54952e-15	5.21823e-11	81	CA04289_01	IPF2280	CA4264	unknown function	Sequence	Oligo report	Gene image	CandidaDB	http://www.candidagenome.org/cgi-bin/locus.pl?locus=orf19.6658
orf19.4771	2729	CA02347_01	-2.00492	-1.64404	-0.182783	-2.03474	0	0	88	CA02347_01	IPF11667	CA2187	unknown function	Sequence	Oligo report	Gene image	CandidaDB	http://www.candidagenome.org/cgi-bin/locus.pl?locus=orf19.4771
orf19.270	4847	CA01826_01	-1.22884	-1.73301	0.0627287	-2.01562	7.34806e-10	5.07898e-06	41	CA01826_01	NULL		NULL	Sequence	Oligo report	Gene image	CandidaDB	http://www.candidagenome.org/cgi-bin/locus.pl?locus=orf19.270
orf19.915	1061	CA00570_01	-0.585645	-1.41852	0.118479	-2.00956	1.04172e-06	0.00720039	85	CA00570_01	IPF17975	CA0116	unknown function	Sequence	Oligo report	Gene image	CandidaDB	http://www.candidagenome.org/cgi-bin/locus.pl?locus=orf19.915
orf19.7436	385	CA10180_01	-1.69783	-0.66457	0.019139	-2.00506	0	0	101	CA10180_01	CaAAF1	CA5726	Adhesion and aggregation mediating surface antigen	Sequence	Oligo report		CandidaDB	http://www.candidagenome.org/cgi-bin/locus.pl?locus=orf19.7436
orf19.7676	2530	CA06243_01	2.19613	1.21737	-0.0860651	-1.94268	0	0	78	CA06243_01	IPF4959	CA6057	D-xylulose reductase (by homology)	Sequence	Oligo report	Gene image	CandidaDB	http://www.candidagenome.org/cgi-bin/locus.pl?locus=orf19.7676
orf19.5557	3595	CA02442_01	0.946854	2.43075	0.402145	-1.90698	5.83977e-14	4.03645e-10	31	CA02442_01	IPF5376	CA2288	unknown function	Sequence	Oligo report	Gene image	CandidaDB	http://www.candidagenome.org/cgi-bin/locus.pl?locus=orf19.5557
orf19.6755	3840	CA06110_01	2.04269	0.865097	0.523032	-1.82953	9.8363e-07	0.00679885	30	CA06110_01	CaDLD2	CA5942	D-lactate ferrycytochrome C oxidoreductase (by homology)	Sequence	Oligo report	Gene image	CandidaDB	http://www.candidagenome.org/cgi-bin/locus.pl?locus=orf19.6755
orf19.3984	4638	CA00623_01	-2.36864	-0.668202	-0.243008	-1.75929	0	0	113	CA00623_01	IPF19142	CA0184	unknown function	Sequence	Oligo report	Gene image	CandidaDB	http://www.candidagenome.org/cgi-bin/locus.pl?locus=orf19.3984
orf19.7585	3892	CA10179_01	-2.04987	1.18803	0.560425	-1.72168	0	0	36	CA10179_01	CaINO1	CA5986	myo-inositol-1-phosphate synthase	Sequence	Oligo report		CandidaDB	http://www.candidagenome.org/cgi-bin/locus.pl?locus=orf19.7585
orf19.7085	5089	CA05767_01	-2.66049	-0.650921	-0.296337	-1.69791	0	0	87	CA05767_01	IPF525	CA5613	unknown function	Sequence	Oligo report	Gene image	CandidaDB	http://www.candidagenome.org/cgi-bin/locus.pl?locus=orf19.7085
orf19.5876	2129	CA06360_01	-2.2411	-0.438697	0.284292	-1.57865	0	0	106	CA06360_01	IPF1835	CA6160	unknown function	Sequence	Oligo report	Gene image	CandidaDB	http://www.candidagenome.org/cgi-bin/locus.pl?locus=orf19.5876
orf19.4765	4466	CA02749_01	-0.368075	-3.87528	0.0372342	-1.57441	0	0	146	CA02749_01	IPF10919	CA2625	Similar to Flo1p (by homology)	Sequence	Oligo report	Gene image	CandidaDB	http://www.candidagenome.org/cgi-bin/locus.pl?locus=orf19.4765
orf19.2768	5437	CA04146_01	-2.73586	-0.274081	0.406964	-1.34036	3.9192e-07	0.00270895	23	CA04146_01	CaAMS1	CA4123	alpha-mannosidase (by homology)	Sequence	Oligo report	Gene image	CandidaDB	http://www.candidagenome.org/cgi-bin/locus.pl?locus=orf19.2768
orf19.1267	2656	CA01250_01	-2.12635	-1.07175	-0.00177871	-1.29355	0	0	114	CA01250_01	IPF10278	CA0945	DNA-J - like protein (by homology)	Sequence	Oligo report	Gene image	CandidaDB	http://www.candidagenome.org/cgi-bin/locus.pl?locus=orf19.1267
orf19.5809	1992	CA04180_01	2.66819	0.427645	-0.00157181	-1.19194	0	0	70	CA04180_01	IPF20164.3eoc	CA3155	putative kynurenine aminotransferase, 3-prime end (by homology)	Sequence	Oligo report	Gene image	CandidaDB	http://www.candidagenome.org/cgi-bin/locus.pl?locus=orf19.5809
orf19.4688	1330	CA01045_01	3.09396	-3.16712	-0.193145	-1.18377	0	0	121	CA01045_01	IPF14119	CA0689	unknown function	Sequence	Oligo report	Gene image	CandidaDB	http://www.candidagenome.org/cgi-bin/locus.pl?locus=orf19.4688
orf19.4662	4485	CA02821_01	-1.04721	-0.403212	-4.86299	-1.06448	0	0	33	CA02821_01	IPF4828	CA2709	by homology to S. cerevisiae YEAST TRANSCRIPTION FACTOR RLM1	Sequence	Oligo report	Gene image	CandidaDB	http://www.candidagenome.org/cgi-bin/locus.pl?locus=orf19.4662
orf19.10993	6609	CA02592_01	-1.15241	1.58875	-3.2134	-1.01791	0	0	32	CA02592_01	IPF9955	CA2452	unknown function	Sequence	Oligo report	Gene image	CandidaDB	http://www.candidagenome.org/cgi-bin/locus.pl?locus=orf19.10993
orf19.4670	3584	CA02398_01	-1.22993	-4.02316	0.247805	-0.999222	0	0	77	CA02398_01	IPF7414	CA2243	putative transcription factor (by homology)	Sequence	Oligo report	Gene image	CandidaDB	http://www.candidagenome.org/cgi-bin/locus.pl?locus=orf19.4670
orf19.11254	3075	CA01474_01	3.87736	-0.74445	0.266009	-0.842629	0	0	29	CA01474_01	CaARG8	CA1209	acetylornithine aminotransferase (by homology)	Sequence	Oligo report	Gene image	CandidaDB	http://www.candidagenome.org/cgi-bin/locus.pl?locus=orf19.11254
orf19.4024	2885	CA04856_01	-2.13739	-3.63647	-1.95827	-0.793162	0	0	142	CA04856_01	IPF3367	CA4790	Riboflavin synthase (by homology)	Sequence	Oligo report	Gene image	CandidaDB	http://www.candidagenome.org/cgi-bin/locus.pl?locus=orf19.4024
orf19.2947	1106	CA04205_01	-2.49586	-1.03101	-0.299296	-0.717436	1.04583e-13	7.22878e-10	117	CA04205_01	CaSNZ1	CA4184	stationary phase protein by homology	Sequence	Oligo report	Gene image	CandidaDB	http://www.candidagenome.org/cgi-bin/locus.pl?locus=orf19.2947
orf19.6958	3297	CA04783_01	2.11434	0.331157	-0.559738	-0.627283	0	0	67	CA04783_01	CaECM18	CA4720	Involved in cell wall biogenesis and architecture (by homology)	Sequence	Oligo report	Gene image	CandidaDB	http://www.candidagenome.org/cgi-bin/locus.pl?locus=orf19.6958
orf19.5342	2945	CA05642_01	2.12942	0.166926	-0.170658	-0.416309	0	0	61	CA05642_01	IPF768	CA5500	unknown function	Sequence	Oligo report	Gene image	CandidaDB	http://www.candidagenome.org/cgi-bin/locus.pl?locus=orf19.5342
orf19.2331	3887	CA03399_01	-6.06955	0.380183	0.444929	-0.395559	0	0	15	CA03399_01	CaADA2	CA3340	general transcriptional adaptor or co-activator (by homology)	Sequence	Oligo report	Gene image	CandidaDB	http://www.candidagenome.org/cgi-bin/locus.pl?locus=orf19.2331
orf19.2331	4301	CA03399_01	-8.49909	0.243065	0.276767	-0.395045	0	0	5	CA03399_01	CaADA2	CA3340	general transcriptional adaptor or co-activator (by homology)	Sequence	Oligo report	Gene image	CandidaDB	http://www.candidagenome.org/cgi-bin/locus.pl?locus=orf19.2331
orf19.1120	4418	CA02026_01	2.05276	1.21065	0.103856	-0.368543	0	0	60	CA02026_01	IPF13879	CA1812	unknown function	Sequence	Oligo report	Gene image	CandidaDB	http://www.candidagenome.org/cgi-bin/locus.pl?locus=orf19.1120
orf19.6308	6661	CA03339_01	-3.88914	0.564048	-0.0911527	-0.292294	1.53181e-06	0.0105879	27	CA03339_01	IPF12227.3f	CA3274	unknown function, 3-prime end	Sequence	Oligo report	Gene image	CandidaDB	http://www.candidagenome.org/cgi-bin/locus.pl?locus=orf19.6308
orf19.4025	6342	CA04857_01	-3.76785	-4.39577	-1.9065	-0.269953	0	0	144	CA04857_01	IPF3370	CA4791	similar to Saccharomyces cerevisiae Pre1p 20S proteasome subunit C11(beta4) (by homology)	Sequence	Oligo report	Gene image	CandidaDB	http://www.candidagenome.org/cgi-bin/locus.pl?locus=orf19.4025
orf19.6180	4939	CA03269_01	2.00276	0.541136	-0.276203	-0.265542	0	0	68	CA03269_01	IPF3439	CA3200	unknown function	Sequence	Oligo report	Gene image	CandidaDB	http://www.candidagenome.org/cgi-bin/locus.pl?locus=orf19.6180
orf19.4026	400	CA10076_01	-4.07757	-4.85945	-2.3627	-0.253759	0	0	143	CA10076_01	CaHIS1	CA4792	ATP phosphoribosyltransferase	Sequence	Oligo report		CandidaDB	http://www.candidagenome.org/cgi-bin/locus.pl?locus=orf19.4026
orf19.2331	3881	CA03399_01	-6.98994	0.104585	0.493338	-0.250418	0	0	10	CA03399_01	CaADA2	CA3340	general transcriptional adaptor or co-activator (by homology)	Sequence	Oligo report	Gene image	CandidaDB	http://www.candidagenome.org/cgi-bin/locus.pl?locus=orf19.2331
orf19.2877	6613	CA02612_01	-2.6345	-0.39563	-0.254963	-0.248499	0	0	145	CA02612_01	CaPDC11	CA2474	Pyruvate decarboxylase (by homology)	Sequence	Oligo report	Gene image	CandidaDB	http://www.candidagenome.org/cgi-bin/locus.pl?locus=orf19.2877
orf19.1847	5390	CA03420_01	-3.48218	-0.430386	0.280751	-0.240253	9.10383e-15	6.29257e-11	25	CA03420_01	IPF4667	CA3367	unknown Function	Sequence	Oligo report	Gene image	CandidaDB	http://www.candidagenome.org/cgi-bin/locus.pl?locus=orf19.1847
orf19.6214	1887	CA02696_01	2.12218	0.56484	0.187053	-0.234576	0	0	59	CA02696_01	CaATH1	CA2574	acid trehalase, vacuolar	Sequence	Oligo report	Gene image	CandidaDB	http://www.candidagenome.org/cgi-bin/locus.pl?locus=orf19.6214
orf19.986	1737	CA10004_01	-2.06667	-0.464809	0.190741	-0.218373	0	0	112	CA10004_01	NULL		Gly1	Sequence	Oligo report		CandidaDB	http://www.candidagenome.org/cgi-bin/locus.pl?locus=orf19.986
orf19.2331	4307	CA03399_01	-6.08072	0.231834	0.093224	-0.198064	0	0	16	CA03399_01	CaADA2	CA3340	general transcriptional adaptor or co-activator (by homology)	Sequence	Oligo report	Gene image	CandidaDB	http://www.candidagenome.org/cgi-bin/locus.pl?locus=orf19.2331
orf19.4609	2062	CA05285_01	2.15428	0.0637743	0.210057	-0.181158	0	0	125	CA05285_01	IPF6037	CA5171	Similar to Legionella pneumophila sbpA	Sequence	Oligo report	Gene image	CandidaDB	http://www.candidagenome.org/cgi-bin/locus.pl?locus=orf19.4609
orf19.2331	3875	CA03399_01	-6.72069	-0.00302751	0.465186	-0.160137	0	0	9	CA03399_01	CaADA2	CA3340	general transcriptional adaptor or co-activator (by homology)	Sequence	Oligo report	Gene image	CandidaDB	http://www.candidagenome.org/cgi-bin/locus.pl?locus=orf19.2331
orf19.1473	4588	CA04576_01	-2.2969	-0.398811	0.0188777	-0.138706	0	0	24	CA04576_01	IPF4386	CA4532	unknown function	Sequence	Oligo report	Gene image	CandidaDB	http://www.candidagenome.org/cgi-bin/locus.pl?locus=orf19.1473
orf19.2331	4319	CA03399_01	-6.34995	0.130687	-0.0286631	-0.131784	0	0	7	CA03399_01	CaADA2	CA3340	general transcriptional adaptor or co-activator (by homology)	Sequence	Oligo report	Gene image	CandidaDB	http://www.candidagenome.org/cgi-bin/locus.pl?locus=orf19.2331
orf19.2331	6035	CA03399_01	-5.73542	0.335162	0.48097	-0.117384	0	0	14	CA03399_01	CaADA2	CA3340	general transcriptional adaptor or co-activator (by homology)	Sequence	Oligo report	Gene image	CandidaDB	http://www.candidagenome.org/cgi-bin/locus.pl?locus=orf19.2331
orf19.2331	6041	CA03399_01	-5.67918	0.0892342	0.331742	-0.106373	0	0	19	CA03399_01	CaADA2	CA3340	general transcriptional adaptor or co-activator (by homology)	Sequence	Oligo report	Gene image	CandidaDB	http://www.candidagenome.org/cgi-bin/locus.pl?locus=orf19.2331
orf19.3388	474	CA01061_01	2.14748	0.215196	-0.0721853	-0.0898368	0	0	58	CA01061_01	CaZorro2a.5f	CA0710	putative reverse transcriptase, 5-prime end	Sequence	Oligo report	Gene image	CandidaDB	http://www.candidagenome.org/cgi-bin/locus.pl?locus=orf19.3388
orf19.7106	1219	CA05746_01	2.29662	-0.478818	0.0638679	-0.0810695	0	0	69	CA05746_01	IPF19814	CA5594	folate hydrolase (by homology)	Sequence	Oligo report	Gene image	CandidaDB	http://www.candidagenome.org/cgi-bin/locus.pl?locus=orf19.7106
orf19.2331	1928	CA03399_01	-5.25309	-0.16969	0.266032	-0.0710664	0	0	18	CA03399_01	CaADA2	CA3340	general transcriptional adaptor or co-activator (by homology)	Sequence	Oligo report	Gene image	CandidaDB	http://www.candidagenome.org/cgi-bin/locus.pl?locus=orf19.2331
orf19.2331	3869	CA03399_01	-5.49835	0.200108	0.450163	0.0199527	0	0	13	CA03399_01	CaADA2	CA3340	general transcriptional adaptor or co-activator (by homology)	Sequence	Oligo report	Gene image	CandidaDB	http://www.candidagenome.org/cgi-bin/locus.pl?locus=orf19.2331
orf19.4570	4802	CA01379_01	2.62171	0.752905	-0.204667	0.0535907	0	0	62	CA01379_01	IPF1038	CA1085	unknown function	Sequence	Oligo report	Gene image	CandidaDB	http://www.candidagenome.org/cgi-bin/locus.pl?locus=orf19.4570
orf19.4060	4705	CA10144_01	-2.00791	0.118803	0.119352	0.0926186	0	0	133	CA10144_01	CaARO4	CA1484	3-dehydro-deoxyphosphoheptonate aldolase, tyrosine-inhibited (by homology)	Sequence	Oligo report		CandidaDB	http://www.candidagenome.org/cgi-bin/locus.pl?locus=orf19.4060
orf19.2331	5615	CA03399_01	-6.22046	0.303712	0.427088	0.116805	0	0	11	CA03399_01	CaADA2	CA3340	general transcriptional adaptor or co-activator (by homology)	Sequence	Oligo report	Gene image	CandidaDB	http://www.candidagenome.org/cgi-bin/locus.pl?locus=orf19.2331
orf19.2331	5609	CA03399_01	-6.96992	0.0785068	0.427627	0.133674	0	0	8	CA03399_01	CaADA2	CA3340	general transcriptional adaptor or co-activator (by homology)	Sequence	Oligo report	Gene image	CandidaDB	http://www.candidagenome.org/cgi-bin/locus.pl?locus=orf19.2331
orf19.2331	4313	CA03399_01	-7.43439	0.321112	-0.00266397	0.135182	0	0	6	CA03399_01	CaADA2	CA3340	general transcriptional adaptor or co-activator (by homology)	Sequence	Oligo report	Gene image	CandidaDB	http://www.candidagenome.org/cgi-bin/locus.pl?locus=orf19.2331
orf19.5180	4328	CA10253_01	2.7122	-0.228244	-0.0277857	0.13604	0	0	124	CA10253_01	IPF11888	CA4416	unknown function	Sequence	Oligo report		CandidaDB	http://www.candidagenome.org/cgi-bin/locus.pl?locus=orf19.5180
orf19.2331	6047	CA03399_01	-4.9576	0.140713	0.43391	0.181513	0	0	17	CA03399_01	CaADA2	CA3340	general transcriptional adaptor or co-activator (by homology)	Sequence	Oligo report	Gene image	CandidaDB	http://www.candidagenome.org/cgi-bin/locus.pl?locus=orf19.2331
orf19.4304	3610	CA02765_01	-2.12704	0.0989088	0.372744	0.194362	4.44089e-16	3.06954e-12	98	CA02765_01	CaGAP3	CA2638	General amino acid permease (by homology)	Sequence	Oligo report	Gene image	CandidaDB	http://www.candidagenome.org/cgi-bin/locus.pl?locus=orf19.4304
orf19.2331	5597	CA03399_01	-5.36389	-0.271631	0.636815	0.243126	0	0	12	CA03399_01	CaADA2	CA3340	general transcriptional adaptor or co-activator (by homology)	Sequence	Oligo report	Gene image	CandidaDB	http://www.candidagenome.org/cgi-bin/locus.pl?locus=orf19.2331
orf19.2331	6029	CA03399_01	-4.40754	0.467531	0.497675	0.248682	0	0	20	CA03399_01	CaADA2	CA3340	general transcriptional adaptor or co-activator (by homology)	Sequence	Oligo report	Gene image	CandidaDB	http://www.candidagenome.org/cgi-bin/locus.pl?locus=orf19.2331
orf19.2331	5603	CA03399_01	-7.87737	-0.122229	0.547466	0.29523	0	0	4	CA03399_01	CaADA2	CA3340	general transcriptional adaptor or co-activator (by homology)	Sequence	Oligo report	Gene image	CandidaDB	http://www.candidagenome.org/cgi-bin/locus.pl?locus=orf19.2331
orf19.6996	6773	CA05135_01	-4.57927	0.79123	-0.487409	0.345743	7.37927e-09	5.10055e-05	28	CA05135_01	IPF4514	CA5042	putative alpha-1,3-mannosyltransferase (by homology)	Sequence	Oligo report	Gene image	CandidaDB	http://www.candidagenome.org/cgi-bin/locus.pl?locus=orf19.6996
orf19.341	4164	CA04684_01	-3.0155	0.0554131	0.0797701	0.41265	0	0	22	CA04684_01	IPF1524	CA4635	putative multidrug resistance protein (by homology)	Sequence	Oligo report	Gene image	CandidaDB	http://www.candidagenome.org/cgi-bin/locus.pl?locus=orf19.341
orf19.5305	6392	CA05612_01	2.20817	1.35189	0.180188	0.423569	0	0	123	CA05612_01	IPF8527	CA5476	unknown function	Sequence	Oligo report	Gene image	CandidaDB	http://www.candidagenome.org/cgi-bin/locus.pl?locus=orf19.5305
orf19.5585	6619	CA10292_01	2.02317	0.725549	-0.312159	0.480286	0	0	57	CA10292_01	CaSAP5	CA2499	secreted aspartyl proteinase 5	Sequence	Oligo report	Gene image	CandidaDB	http://www.candidagenome.org/cgi-bin/locus.pl?locus=orf19.5585
orf19.6782	3834	CA06086_01	-3.84447	1.45282	0.799357	0.549961	2.26707e-13	1.567e-09	21	CA06086_01	CaIFQ2	CA5923	Unknown function	Sequence	Oligo report	Gene image	CandidaDB	http://www.candidagenome.org/cgi-bin/locus.pl?locus=orf19.6782
orf19.7422	6820	CA05866_01	-2.5233	0.280939	-0.034407	0.579399	4.44089e-16	3.06954e-12	99	CA05866_01	CaLCP5	CA5718	Ngg1p interacting protein (by homology)	Sequence	Oligo report	Gene image	CandidaDB	http://www.candidagenome.org/cgi-bin/locus.pl?locus=orf19.7422
orf19.2000	4121	CA03970_01	-3.69492	0.835753	0.0979876	0.759283	1.5584e-06	0.0107716	26	CA03970_01	CaCHL1	CA3942	protein of the DEAH box family (by homology)	Sequence	Oligo report	Gene image	CandidaDB	http://www.candidagenome.org/cgi-bin/locus.pl?locus=orf19.2000
orf19.813	4572	CA04236_01	-2.26134	0.284347	0.267005	1.12887	0	0	111	CA04236_01	NULL		NULL	Sequence	Oligo report	Gene image	CandidaDB	http://www.candidagenome.org/cgi-bin/locus.pl?locus=orf19.813
orf19.6679	1542	CA04308_01	2.22382	-0.203793	-0.0867449	1.15015	3.9968e-15	2.76259e-11	71	CA04308_01	IPF2314	CA4281	unknown function	Sequence	Oligo report	Gene image	CandidaDB	http://www.candidagenome.org/cgi-bin/locus.pl?locus=orf19.6679
orf19.996	628	CA03559_01	2.43791	0.121749	-0.344853	1.1696	1.31858e-06	0.00911401	56	CA03559_01	CaIFA15	CA3521	unknown function	Sequence	Oligo report	Gene image	CandidaDB	http://www.candidagenome.org/cgi-bin/locus.pl?locus=orf19.996
orf19.3612	6568	CA01891_01	2.01897	0.600739	0.592312	1.17727	1.04305e-07	0.000720954	55	CA01891_01	CaPST2	CA1673	1,4-benzoquinone reductase by homology	Sequence	Oligo report	Gene image	CandidaDB	http://www.candidagenome.org/cgi-bin/locus.pl?locus=orf19.3612
orf19.2990	874	CA10243_01	3.3847	-0.366605	-0.283013	1.40681	0	0	72	CA10243_01	CaEXG1	CA0822	glucan 1,3-beta-glucosidase	Sequence	Oligo report		CandidaDB	http://www.candidagenome.org/cgi-bin/locus.pl?locus=orf19.2990
orf19.1660	1068	CA03505_01	2.30506	0.234989	0.164124	1.48764	7.19669e-12	4.97435e-08	63	CA03505_01	NULL		NULL	Sequence	Oligo report	Gene image	CandidaDB	http://www.candidagenome.org/cgi-bin/locus.pl?locus=orf19.1660
orf19.2496	1085	CA03844_01	2.17188	-0.292228	0.0814603	1.94189	0	0	73	CA03844_01	CaFRP1	CA3813	member of the FRP family of proteins related to Yarrowia lipolytica glyoxylate pathway regulator Gpr1p and Saccharomyces cerevisiae Fun34p	Sequence	Oligo report	Gene image	CandidaDB	http://www.candidagenome.org/cgi-bin/locus.pl?locus=orf19.2496
orf19.6008	2532	CA06247_01	0.291159	1.9174	-0.41823	2.0867	0	0	64	CA06247_01	IPF8301	CA6060	unknown function	Sequence	Oligo report	Gene image	CandidaDB	http://www.candidagenome.org/cgi-bin/locus.pl?locus=orf19.6008
orf19.5760	3684	CA03857_01	1.7834	2.78644	0.386563	2.13644	7.76125e-08	0.000536458	66	CA03857_01	IPF10662	CA3827	unknown function	Sequence	Oligo report	Gene image	CandidaDB	http://www.candidagenome.org/cgi-bin/locus.pl?locus=orf19.5760
orf19.4211	1900	CA03015_01	-0.931647	2.40773	0.448192	2.17189	0	0	97	CA03015_01	CaFET33	CA2924	cell surface ferroxidase (by homology)	Sequence	Oligo report	Gene image	CandidaDB	http://www.candidagenome.org/cgi-bin/locus.pl?locus=orf19.4211
orf19.1507	3046	CA00823_01	-0.724745	-0.23576	-0.335222	2.17718	3.53942e-06	0.0244644	54	CA00823_01	IPF17676	CA0411	similar to Saccharomyces cerevisiae Cst13p involved in chromosome stability (by homology)	Sequence	Oligo report	Gene image	CandidaDB	http://www.candidagenome.org/cgi-bin/locus.pl?locus=orf19.1507
orf19.9987	5633	CA00791_01	-1.19722	2.31	-0.010929	2.19443	0	0	65	CA00791_01	IPF14109	CA0380	unknown function	Sequence	Oligo report	Gene image	CandidaDB	http://www.candidagenome.org/cgi-bin/locus.pl?locus=orf19.9987
orf19.3893	3524	CA01345_01	0.599348	0.0505943	0.801905	2.27767	1.63551e-10	1.13047e-06	74	CA01345_01	CaSCW11.3eoc	CA1053	glucanase gene family member, 3-prime end (by homology)	Sequence	Oligo report	Gene image	CandidaDB	http://www.candidagenome.org/cgi-bin/locus.pl?locus=orf19.3893
orf19.4910	2259	CA02198_01	0.136917	0.131825	0.254042	2.73971	0	0	76	CA02198_01	IPF9616	CA2024	unknown function	Sequence	Oligo report	Gene image	CandidaDB	http://www.candidagenome.org/cgi-bin/locus.pl?locus=orf19.4910
orf19.7586	3000	CA10175_01	-0.18722	-0.341626	0.320674	3.82091	0	0	75	CA10175_01	CaCHT3	CA5987	chitinase 3 precursor	Sequence	Oligo report		CandidaDB	http://www.candidagenome.org/cgi-bin/locus.pl?locus=orf19.7586

## Sheet: 2. Comparison
Gene ID	Gene symbol	Saccharomyces homolog	R(wt-/wt+)	R(ada2/wt+)	R(cas5/wt+)	R(rlm1/wt+)	Description	CandidaDB	Rogers R(wt-/wt+)	Kuchler R(wt-/wt+)	Clark R(wt-/wt+)	CGD
orf19.4082	DDR48	YMR173W	-6.25065	-2.18122	-1.70032	0.313148	stress protein (by homology)	CandidaDB	-2.73267	-0.0626398		http://www.candidagenome.org/cgi-bin/locus.pl?locus=orf19.4082
orf19.8292	IPF3964	YEL077C	-6.09064	-2.50678	-1.72342	0.315734	unknown function	CandidaDB	-0.853616	0.22011		http://www.candidagenome.org/cgi-bin/locus.pl?locus=orf19.8292
orf19.711	IPF18732	(None)	-5.98199	-3.52004	-1.89958	0.139042	histidine-rich glycoprotein precursor (by homology)	CandidaDB				http://www.candidagenome.org/cgi-bin/locus.pl?locus=orf19.711
orf19.711	NULL	(None)	-5.75426	-3.55131	-1.73048	0.316855	NULL	CandidaDB				http://www.candidagenome.org/cgi-bin/locus.pl?locus=orf19.711
orf19.753	IPF13407	YNR059W	-5.49238	-1.92943	-2.44137	-0.389976	Unknown function	CandidaDB		-0.496207		http://www.candidagenome.org/cgi-bin/locus.pl?locus=orf19.753
orf19.2061	NULL	(None)	-5.22051	-5.45638	-1.30072	-0.0129324	NULL	CandidaDB				http://www.candidagenome.org/cgi-bin/locus.pl?locus=orf19.2061
orf19.6595	RTA4	YOR049C	-5.00779	-4.27964	-1.97856	-0.0278017	Protein involved in 7-aminocholesterol resistance (by homology)	CandidaDB		0.247537		http://www.candidagenome.org/cgi-bin/locus.pl?locus=orf19.6595
orf19.11225	IPF4724	(None)	-4.27589	2.96508	-0.625858	-0.423184	unknown Function	CandidaDB				http://www.candidagenome.org/cgi-bin/locus.pl?locus=orf19.11225
orf19.3932	IPF16253	(pombeVIP1)	-4.27144	-1.60864	-1.44129	-0.19786	unknown function	CandidaDB	-0.137532			http://www.candidagenome.org/cgi-bin/locus.pl?locus=orf19.3932
orf19.7350	NULL	(None)	-4.14779	-1.0202	-0.792952	0.0715178	NULL	CandidaDB				http://www.candidagenome.org/cgi-bin/locus.pl?locus=orf19.7350
orf19.3282	IPF300	(None)	-4.13933	-0.839606	-0.429326	0.0829866	unknown function	CandidaDB				http://www.candidagenome.org/cgi-bin/locus.pl?locus=orf19.3282
orf19.7350	IPF7109	(None)	-4.09714	-1.85465	-1.66589	0.108434	unknown function	CandidaDB				http://www.candidagenome.org/cgi-bin/locus.pl?locus=orf19.7350
orf19.7330	PET18	YCR020C	-4.08493	-1.09191	-0.941135	0.408956	Putative transcriptional regulator (by homology)	CandidaDB				http://www.candidagenome.org/cgi-bin/locus.pl?locus=orf19.7330
orf19.6840	IPF3535	(None)	-3.74878	-2.1268	-0.961567	0.205676	unknown function	CandidaDB				http://www.candidagenome.org/cgi-bin/locus.pl?locus=orf19.6840
orf19.13071	IPF15013	(None)	-3.72966	-1.76097	-2.06646	-0.151811	pyruvate decarboxylase regulatory protein (by homology)	CandidaDB				http://www.candidagenome.org/cgi-bin/locus.pl?locus=orf19.13071
orf19.5741	ALS1.3eoc	YJR004C	-3.66841	-4.5584	-2.08017	0.364857	agglutinin-like protein, 3-prime end	CandidaDB	-2.5888		1.95109	http://www.candidagenome.org/cgi-bin/locus.pl?locus=orf19.5741
orf19.246	IPF10495	YIL108W	-3.57596	-0.984384	-0.863907	0.105051	unknown function	CandidaDB		0.334001	-1.75132	http://www.candidagenome.org/cgi-bin/locus.pl?locus=orf19.246
orf19.6877	IPF19801	(None)	-3.35059	-1.70828	-0.714857	0.2767	unknown function	CandidaDB	-1.00807			http://www.candidagenome.org/cgi-bin/locus.pl?locus=orf19.6877
orf19.6928	SAP9	YLR120C	-3.31997	-1.28367	-0.535499	0.269928	aspartyl proteinase 9 (by homology)	CandidaDB		-0.357833		http://www.candidagenome.org/cgi-bin/locus.pl?locus=orf19.6928
orf19.7329	QRI8	YMR022W	-3.12511	-1.12911	-1.25554	0.194811	E2 ubiquitin-conjugation enzyme (by homology)	CandidaDB		0.468931		http://www.candidagenome.org/cgi-bin/locus.pl?locus=orf19.7329
orf19.6920	IPF2195	(None)	-3.1103	-2.89099	-1.32597	-0.383646	unknown function	CandidaDB				http://www.candidagenome.org/cgi-bin/locus.pl?locus=orf19.6920
orf19.7054	NULL	(None)	-2.98024	-2.29003	-0.827251	-0.139804	NULL	CandidaDB				http://www.candidagenome.org/cgi-bin/locus.pl?locus=orf19.7054
orf19.7445	IPF2878	YBR105C	-2.91709	-1.38655	-0.695856	0.187434	unknown function	CandidaDB	0.87299	0.592375		http://www.candidagenome.org/cgi-bin/locus.pl?locus=orf19.7445
orf19.7339	BGL22	(B-gluCosidase)	-2.87579	-1.72563	-0.703565	0.449884	endo-beta-1,3-glucanase (by homology)	CandidaDB	0.164281			http://www.candidagenome.org/cgi-bin/locus.pl?locus=orf19.7339
orf19.4255	ECM331	YDR055W	-2.69987	-0.755656	-1.54143	0.073138	Involved in cell wall biogenesis and architecture (by homology)	CandidaDB	-1.0812	-0.820485	-2.05889	http://www.candidagenome.org/cgi-bin/locus.pl?locus=orf19.4255
orf19.5459	IPF4160	YGR178C	-2.63069	0.0388214	0.426385	0.0343591	unknown function	CandidaDB		0.202987		http://www.candidagenome.org/cgi-bin/locus.pl?locus=orf19.5459
orf19.5302	NULL	(None)	-2.59688	1.30727	0.598547	-2.49851	NULL	CandidaDB				http://www.candidagenome.org/cgi-bin/locus.pl?locus=orf19.5302
orf19.5995	IPF4847	YOR197W	-2.5794	0.773435	-0.830485	-0.335	unknown function	CandidaDB		0.261881		http://www.candidagenome.org/cgi-bin/locus.pl?locus=orf19.5995
orf19.2190	VRP1	YLR337C	-2.53024	0.746501	0.273997	-0.0514839	verprolin (by homology)	CandidaDB				http://www.candidagenome.org/cgi-bin/locus.pl?locus=orf19.2190
orf19.9467	IPF15442	YJL171C	-2.50941	-0.840774	-1.02846	-0.268784	unknown function	CandidaDB	0.0534929	-0.705978		http://www.candidagenome.org/cgi-bin/locus.pl?locus=orf19.9467
orf19.7504	IPF407	YGR161C	-2.47516	-2.47953	-1.72846	0.380675	unknown function	CandidaDB	-0.71953	0.0867755		http://www.candidagenome.org/cgi-bin/locus.pl?locus=orf19.7504
orf19.7359	IPF14682	YNL027W	-2.45853	-3.04294	-0.813954	-0.0289975	putative transcription factor (by homology)	CandidaDB		-0.266637		http://www.candidagenome.org/cgi-bin/locus.pl?locus=orf19.7359
orf19.4043	IPF7217	YGR097W	-2.40469	-0.6466	-0.698369	-0.606178	unknown function	CandidaDB		0.00614452		http://www.candidagenome.org/cgi-bin/locus.pl?locus=orf19.4043
orf19.3127	CZF1	(zinCCluster)	-2.40151	-1.46789	-0.307585	0.321501	Candida zinc finger protein	CandidaDB				http://www.candidagenome.org/cgi-bin/locus.pl?locus=orf19.3127
orf19.6864	IPF9833	(DrosophHSP70interaCtor)	-2.38837	-1.11065	0.0707796	-0.183361	unknown function	CandidaDB				http://www.candidagenome.org/cgi-bin/locus.pl?locus=orf19.6864
orf19.3615	IPF5192	YPL191C	-2.3844	-2.09936	-1.39531	-0.375991	unknown function	CandidaDB	-0.0639297			http://www.candidagenome.org/cgi-bin/locus.pl?locus=orf19.3615
orf19.5437	CARHR2	YIL053W	-2.37326	-1.25563	0.283045	1.18093	DL-glycerol phosphatase	CandidaDB		0.848466		http://www.candidagenome.org/cgi-bin/locus.pl?locus=orf19.5437
orf19.12512	IPF15681	(None)	-2.34921	0.226507	-0.7587	-0.874899	unknown function	CandidaDB				http://www.candidagenome.org/cgi-bin/locus.pl?locus=orf19.12512
orf19.1727	PMC1	YGL006W	-2.33987	0.495943	-1.09431	0.0666057	Ca2+-transporting P-type ATPase (by homology)	CandidaDB		0.405213		http://www.candidagenome.org/cgi-bin/locus.pl?locus=orf19.1727
orf19.3548.1	NULL	(None)	-2.33818	-0.0158379	-0.484896	1.00729	Wh11=white colony-forming gene {white-opaque switching system}	CandidaDB				http://www.candidagenome.org/cgi-bin/locus.pl?locus=orf19.3548.1
orf19.6420	PGA13	(muCin-like)	-2.32471	2.05955	-3.04231	-1.46211	Similarity to mucin proteins (by homology)	CandidaDB	-1.98086			http://www.candidagenome.org/cgi-bin/locus.pl?locus=orf19.6420
orf19.1618	GFA1	YKL104C	-2.31549	-1.57433	-0.0196031	-0.386532	glutamine:fructose-6-phosphateamidotransferase	CandidaDB	0.117369	-0.270529		http://www.candidagenome.org/cgi-bin/locus.pl?locus=orf19.1618
orf19.11659	IPF11897	YIR019C	-2.30949	0.594908	-0.480271	0.0457884	unknown function	CandidaDB				http://www.candidagenome.org/cgi-bin/locus.pl?locus=orf19.11659
orf19.6101	NULL	(None)	-2.30674	-0.864658	0.553868	-0.197768	NULL	CandidaDB				http://www.candidagenome.org/cgi-bin/locus.pl?locus=orf19.6101
orf19.7456	IPF2903	(None)	-2.27097	-1.85183	-1.14287	-0.227539	unknown function	CandidaDB				http://www.candidagenome.org/cgi-bin/locus.pl?locus=orf19.7456
orf19.2706	CRH11	YGR189C	-2.26525	0.00232553	-1.93894	-0.694273	Probable membrane protein (by homology)	CandidaDB	-1.43263	-0.889766	-2.20163	http://www.candidagenome.org/cgi-bin/locus.pl?locus=orf19.2706
orf19.951	IPF1548	(None)	-2.25128	-1.72722	-0.39836	0.161296	unknown function	CandidaDB	0.952656			http://www.candidagenome.org/cgi-bin/locus.pl?locus=orf19.951
orf19.7531	IPF351	YMR090W	-2.24245	1.56738	-1.07985	-0.214735	unknown function	CandidaDB		-0.317594		http://www.candidagenome.org/cgi-bin/locus.pl?locus=orf19.7531
orf19.5799	IPF20010	YNL278W	-2.2359	-1.78474	-0.0275875	0.495905	unknown function	CandidaDB		0.372082		http://www.candidagenome.org/cgi-bin/locus.pl?locus=orf19.5799
orf19.4377	KRE1	YNL322C	-2.23156	-0.602794	-0.499496	0.222802	secretory pathway protein	CandidaDB	-0.77858	0.506097		http://www.candidagenome.org/cgi-bin/locus.pl?locus=orf19.4377
orf19.909	IPF4553	YDL048C	-2.17606	-0.917098	-0.150066	0.255464	unknown function	CandidaDB	-0.639837	0.478748		http://www.candidagenome.org/cgi-bin/locus.pl?locus=orf19.909
orf19.3298	CCH1	YGR217W	-2.17357	-1.18637	-0.304981	0.304836	Calcium channel protein (by homology)	CandidaDB		0.227692		http://www.candidagenome.org/cgi-bin/locus.pl?locus=orf19.3298
orf19.12077	IPF6032	(None)	-2.12911	0.270784	-0.160669	-0.0854997	unknown function	CandidaDB				http://www.candidagenome.org/cgi-bin/locus.pl?locus=orf19.12077
orf19.4135	PRC2	YMR297W	-2.12176	1.05019	-0.615453	0.00462907	carboxypeptidase y precursor , serine-type protease (by homology)	CandidaDB	0.00951384	0.135071		http://www.candidagenome.org/cgi-bin/locus.pl?locus=orf19.4135
orf19.6658	IPF2280	(None)	-2.05414	-0.496026	-0.136037	0.127491	unknown function	CandidaDB				http://www.candidagenome.org/cgi-bin/locus.pl?locus=orf19.6658
orf19.4771	IPF11667	YKL201C	-2.03474	-2.00492	-1.64404	-0.182783	unknown function	CandidaDB		-0.341417		http://www.candidagenome.org/cgi-bin/locus.pl?locus=orf19.4771
orf19.270	NULL	(None)	-2.01562	-1.22884	-1.73301	0.0627287	NULL	CandidaDB				http://www.candidagenome.org/cgi-bin/locus.pl?locus=orf19.270
orf19.7436	AAF1	(None)	-2.00506	-1.69783	-0.66457	0.019139	Adhesion and aggregation mediating surface antigen	CandidaDB	-1.04537			http://www.candidagenome.org/cgi-bin/locus.pl?locus=orf19.7436
orf19.1344	IPF19908	(None)	-1.95856	0.732609	-1.06111	0.109414	unknown function	CandidaDB				http://www.candidagenome.org/cgi-bin/locus.pl?locus=orf19.1344
orf19.4474	IPF14379	YNL155W	-1.94075	-1.04445	-0.761755	-0.248728	unknown function	CandidaDB		-0.0908534		http://www.candidagenome.org/cgi-bin/locus.pl?locus=orf19.4474
orf19.5250	IPF2027	(None)	-1.91	1.00923	-0.99103	0.124526	unknown function	CandidaDB				http://www.candidagenome.org/cgi-bin/locus.pl?locus=orf19.5250
orf19.3829	PHR1	YMR307W	-1.87215	-0.172097	0.112809	-0.309248	GPI-anchored pH responsive glycosyl transferase	CandidaDB	-1.39064			http://www.candidagenome.org/cgi-bin/locus.pl?locus=orf19.3829
orf19.4044	MUM2	YBR057C	-1.84377	-1.92573	-0.316134	0.121584	ubiquitin C-terminal hydrolase (by homology)	CandidaDB		0.738569		http://www.candidagenome.org/cgi-bin/locus.pl?locus=orf19.4044
orf19.2432	IPF15604	YFL031W	-1.84082	-0.119502	-0.916634	0.00993649	transcription factor (by homology)	CandidaDB	0.127057	0.312267		http://www.candidagenome.org/cgi-bin/locus.pl?locus=orf19.2432
orf19.5191	NULL	(NotinCDB)	-1.81414	-0.0740701	-0.769208	0.0262055	hypothetical protein	CandidaDB				http://www.candidagenome.org/cgi-bin/locus.pl?locus=orf19.5191
orf19.2699	ABP1	YCR088W	-1.81066	-0.421086	-0.378443	-0.0892289	actin-binding protein (by homology)	CandidaDB	-0.27372	0.430023		http://www.candidagenome.org/cgi-bin/locus.pl?locus=orf19.2699
orf19.3635	IPF14241	(MUC1-like)	-1.80798	-0.642755	0.10372	-0.0798483	unknown function	CandidaDB				http://www.candidagenome.org/cgi-bin/locus.pl?locus=orf19.3635
orf19.7077	FRE7	YOL152W	-1.77305	-0.983606	0.0241296	0.0111079	Ferric reductase transmembrane component (by homology)	CandidaDB		0.116379		http://www.candidagenome.org/cgi-bin/locus.pl?locus=orf19.7077
orf19.3984	IPF19142	YGR237C	-1.75929	-2.36864	-0.668202	-0.243008	unknown function	CandidaDB	-0.0994365			http://www.candidagenome.org/cgi-bin/locus.pl?locus=orf19.3984
orf19.2344	NULL	(NotinCDB)	-1.755	-0.847298	0.558457	0.628284	NULL	CandidaDB				http://www.candidagenome.org/cgi-bin/locus.pl?locus=orf19.2344
orf19.2886	ERK1	YGR040W	-1.75324	-0.564958	-1.16953	-0.473116	mitogen-activated protein kinase (FUS3 homolog)	CandidaDB		-0.0655723		http://www.candidagenome.org/cgi-bin/locus.pl?locus=orf19.2886
orf19.6905	IPF2223	YNL011C	-1.71124	-0.326249	-0.631886	0.277237	unknown function	CandidaDB		-0.126312		http://www.candidagenome.org/cgi-bin/locus.pl?locus=orf19.6905
orf19.12366	IPF8854	YER001W	-1.68436	0.223632	-0.681689	-0.368195	similar to Saccharomyces cerevisiae Mnn1p alpha-1,3-mannosyltransferase (by homology)	CandidaDB		0.417283		http://www.candidagenome.org/cgi-bin/locus.pl?locus=orf19.12366
orf19.4309	GRP2	YOL151W	-1.67591	-1.31926	-1.28606	0.2316	Reductase (by homology)	CandidaDB	0.72786	-0.0071955		http://www.candidagenome.org/cgi-bin/locus.pl?locus=orf19.4309
orf19.2075	DFG5	YMR238W	-1.67121	1.22738	-0.286315	-0.00352846	Required for filamentous growth (by homology)	CandidaDB		-0.195663	-1.41504	http://www.candidagenome.org/cgi-bin/locus.pl?locus=orf19.2075
orf19.1917	IPF3348	YGR263C	-1.66454	0.668801	0.515979	-0.0256943	unknown function	CandidaDB		0.652253		http://www.candidagenome.org/cgi-bin/locus.pl?locus=orf19.1917
orf19.7115	SAC7	YDR389W	-1.64553	0.220953	0.379705	0.211146	GAP for RHO1 by homology	CandidaDB		0.597005		http://www.candidagenome.org/cgi-bin/locus.pl?locus=orf19.7115
orf19.1658	IPF19685	YDR348C	-1.62936	-1.40599	-0.770737	-0.00256397	unknown function	CandidaDB	0.071758	-0.521302		http://www.candidagenome.org/cgi-bin/locus.pl?locus=orf19.1658
orf19.5025	MET3	YJR010W	-1.62425	0.1846	-0.475089	-0.00159798	ATP sulfurylase	CandidaDB	-0.0649505	0.215915		http://www.candidagenome.org/cgi-bin/locus.pl?locus=orf19.5025
orf19.6109	TUP1	YCR084C	-1.61951	0.622043	0.516922	0.287549	general transcription repressor	CandidaDB		0.586135		http://www.candidagenome.org/cgi-bin/locus.pl?locus=orf19.6109
orf19.993	IPF20135	YLL011W	-1.59038	-0.387987	0.0154171	-1.13606	unknown function	CandidaDB		-0.393965		http://www.candidagenome.org/cgi-bin/locus.pl?locus=orf19.993
orf19.5876	IPF1835	(None)	-1.57865	-2.2411	-0.438697	0.284292	unknown function	CandidaDB				http://www.candidagenome.org/cgi-bin/locus.pl?locus=orf19.5876
orf19.10622	IPF14362	YJR061W	-1.56708	-0.625805	-0.0769197	0.330522	unknown function	CandidaDB				http://www.candidagenome.org/cgi-bin/locus.pl?locus=orf19.10622
orf19.33	NULL	(NotinCDB)	-1.55264	-0.315715	-0.995791	0.00352846	NULL	CandidaDB				http://www.candidagenome.org/cgi-bin/locus.pl?locus=orf19.33
orf19.7204	IPF2130	YJR149W	-1.55103	-1.61293	-1.03062	-0.21349	similar to 2-nitropropane dioxygenases	CandidaDB		-0.111699		http://www.candidagenome.org/cgi-bin/locus.pl?locus=orf19.7204
orf19.633	IPF11379	(None)	-1.54512	-0.651976	0.200094	0.792438	unknown function	CandidaDB	0.428749			http://www.candidagenome.org/cgi-bin/locus.pl?locus=orf19.633
orf19.4475	MNT4	YBR199W	-1.53804	-1.3571	-0.825483	0.0671634	putative mannosyltransferase	CandidaDB		0.791795		http://www.candidagenome.org/cgi-bin/locus.pl?locus=orf19.4475
orf19.2846	IPF20118	(None)	-1.53702	-1.28196	-0.436385	0.217038	unknown function	CandidaDB	-0.14117			http://www.candidagenome.org/cgi-bin/locus.pl?locus=orf19.2846
orf19.3865	IPF6593	YLR176C	-1.52542	0.359719	0.377428	0.243353	similar to Saccharomyces cerevisiae Rfx1p DNA-binding protein (by homology)	CandidaDB		0.416962		http://www.candidagenome.org/cgi-bin/locus.pl?locus=orf19.3865
orf19.8001	CNH1.3f	(notinCDB)	-1.51388	-0.445246	0.350048	-0.00663648	Na+/H+ antiporter, 3-prime end (by homology)	CandidaDB				http://www.candidagenome.org/cgi-bin/locus.pl?locus=orf19.8001
orf19.8737	IPF13166.3eoc	YDL203C	-1.51378	-0.677511	-0.0946744	-0.979455	unknown function, 3-prime end	CandidaDB				http://www.candidagenome.org/cgi-bin/locus.pl?locus=orf19.8737
orf19.10195	DRS25.3eoc	YMR162C	-1.50755	-0.8549	-0.344508	0.0873587	Probable ATPase, 3-prime end (by homology)	CandidaDB				http://www.candidagenome.org/cgi-bin/locus.pl?locus=orf19.10195
orf19.1373	NULL	(NotinCDB)	-1.50683	0.150708	0.986802	0.155525	NULL	CandidaDB				http://www.candidagenome.org/cgi-bin/locus.pl?locus=orf19.1373
orf19.3438	SCJ1	YMR214W	-1.50561	-0.749171	-0.838412	-0.21807	Mitochondrial and ER import protein (by homology)	CandidaDB		0.0317986		http://www.candidagenome.org/cgi-bin/locus.pl?locus=orf19.3438
orf19.5602	IPF19772	(None)	-1.504	-1.42317	-0.597067	0.343591	unknown function	CandidaDB				http://www.candidagenome.org/cgi-bin/locus.pl?locus=orf19.5602
orf19.7210	NULL	(NotinCDB)	-1.49929	0.170899	-0.612518	-0.124162	NULL	CandidaDB				http://www.candidagenome.org/cgi-bin/locus.pl?locus=orf19.7210
orf19.7229	IML2	YKR018C	-1.48884	-0.844307	-0.412286	0.132829	unknown function	CandidaDB		0.417444		http://www.candidagenome.org/cgi-bin/locus.pl?locus=orf19.7229
orf19.4077	IPF2067	YPL057C	-1.46883	-1.24166	-0.465151	-0.241154	Required for mannosylation of sphingolipids (by homology)	CandidaDB	-0.166953	-0.669934		http://www.candidagenome.org/cgi-bin/locus.pl?locus=orf19.4077
orf19.2844	IPF11688	YPR029C	-1.46155	-0.42478	0.0579359	0.178098	similar to Saccharomyces cerevisiae Apl4p AP-1 complex subunit, gamma-adaptin, 94 KD (by homology)	CandidaDB	-0.714156	-0.0648829		http://www.candidagenome.org/cgi-bin/locus.pl?locus=orf19.2844
orf19.6114	NULL	(NotinCDB)	-1.46053	-1.18908	-0.529513	-0.073365	NULL	CandidaDB				http://www.candidagenome.org/cgi-bin/locus.pl?locus=orf19.6114
orf19.2772	IPF11952	YPL116W	-1.46001	-0.572707	-0.698812	-0.0813013	similar to Saccharomyces cerevisiae Hos3p putative histone deacetylase (by homology)	CandidaDB				http://www.candidagenome.org/cgi-bin/locus.pl?locus=orf19.2772
orf19.6459	DPP3	YDR284C	-1.44204	-1.43996	-1.05429	-0.0156088	Diacylglycerol Pyrophosphate Phosphatase by homology	CandidaDB		0.355682		http://www.candidagenome.org/cgi-bin/locus.pl?locus=orf19.6459
orf19.2209	IPF5479	YOR088W	-1.43725	0.0386694	-1.06832	0.264763	unknown function	CandidaDB		0.575884		http://www.candidagenome.org/cgi-bin/locus.pl?locus=orf19.2209
orf19.215	IPF13202	YMR068W	-1.42917	-0.894516	-1.08037	0.369238	unknown function	CandidaDB		0.37957		http://www.candidagenome.org/cgi-bin/locus.pl?locus=orf19.215
orf19.12536	IPF12312	(None)	-1.42094	-0.546599	-0.442817	0.361361	unknown function	CandidaDB				http://www.candidagenome.org/cgi-bin/locus.pl?locus=orf19.12536
orf19.4166	IPF6203	YLR228C	-1.41491	-0.0287592	0.135406	0.177859	unknown function	CandidaDB				http://www.candidagenome.org/cgi-bin/locus.pl?locus=orf19.4166
orf19.5457	IPF4163	YKL047W	-1.40091	-0.659013	0.465515	0.193159	unknown function	CandidaDB		0.0785637		http://www.candidagenome.org/cgi-bin/locus.pl?locus=orf19.5457
orf19.6706	GYP7	YDL234C	-1.40026	-0.0220189	-0.0785227	-0.0767208	GTPase activating protein (by homology)	CandidaDB		-0.863542	-1.20163	http://www.candidagenome.org/cgi-bin/locus.pl?locus=orf19.6706
orf19.4134	IPF14985	YDR459C	-1.39707	0.376437	-0.310043	0.08224	unknown function	CandidaDB		0.551733		http://www.candidagenome.org/cgi-bin/locus.pl?locus=orf19.4134
orf19.1144	IPF13166.3eoc	YDL203C	-1.38244	-1.16436	0.123224	-0.516672	unknown function, 3-prime end	CandidaDB				http://www.candidagenome.org/cgi-bin/locus.pl?locus=orf19.1144
orf19.8085	IPF2580	YOR140W	-1.36377	-0.595235	0.636159	0.286979	unknown function	CandidaDB	-0.788895			http://www.candidagenome.org/cgi-bin/locus.pl?locus=orf19.8085
orf19.1395	IPF2535	(NotinCDB)	-1.35939	0.0688654	0.258174	0.0107277	unknown function	CandidaDB				http://www.candidagenome.org/cgi-bin/locus.pl?locus=orf19.1395
orf19.3330	CRL1	YKR055W	-1.35022	-0.324282	-0.365153	-0.311932	similar to Saccharomyces cerevisiae Rho4p GTP-binding protein of the rho family (by homology)	CandidaDB		0.76949		http://www.candidagenome.org/cgi-bin/locus.pl?locus=orf19.3330
orf19.7300	IPF2830	(None)	-1.34226	-0.908676	-0.58737	-0.523676	unknown function	CandidaDB				http://www.candidagenome.org/cgi-bin/locus.pl?locus=orf19.7300
orf19.6275	IPF4860	YBR028C	-1.33334	0.282353	0.502239	0.0713181	similarity to ribosomal protein kinases (by homology)	CandidaDB		0.323372		http://www.candidagenome.org/cgi-bin/locus.pl?locus=orf19.6275
orf19.448	IPF5918	YOR042W	-1.32027	-0.492002	-0.525129	-0.0220677	unknown function	CandidaDB		0.0983125		http://www.candidagenome.org/cgi-bin/locus.pl?locus=orf19.448
orf19.7578	IPF915	YDR057W	-1.3066	-0.140056	-0.545278	-0.0831005	unknown function	CandidaDB				http://www.candidagenome.org/cgi-bin/locus.pl?locus=orf19.7578
orf19.5544	SAC6.5f	YDR129C	-1.29548	-1.05129	-0.866312	-0.227406	actin filament bundling protein, fimbrin, 5-prime end (by homology)	CandidaDB				http://www.candidagenome.org/cgi-bin/locus.pl?locus=orf19.5544
orf19.5614	NULL	YMR234W	-1.29533	0.526556	-1.14307	-0.2122	NULL	CandidaDB				http://www.candidagenome.org/cgi-bin/locus.pl?locus=orf19.5614
orf19.1267	IPF10278	YER048C	-1.29355	-2.12635	-1.07175	-0.00177871	DNA-J - like protein (by homology)	CandidaDB		0.380822		http://www.candidagenome.org/cgi-bin/locus.pl?locus=orf19.1267
orf19.4262	PUF2.exon2	YJR091C	-1.2894	-1.01917	-0.204484	-0.463303	RNA-binding protein, exon 2 (by homology)	CandidaDB		0.0781829		http://www.candidagenome.org/cgi-bin/locus.pl?locus=orf19.4262
orf19.2808	IPF9499	YMR280C	-1.28601	-0.0372383	0.44345	0.252368	probable transcription factor (by homology)	CandidaDB		0.788365		http://www.candidagenome.org/cgi-bin/locus.pl?locus=orf19.2808
orf19.5130	PDI1	YCL043C	-1.28556	-0.724363	-0.588785	0.0789406	protein disulfide-isomerase precursor (by homology)	CandidaDB	0.241195	0.603019		http://www.candidagenome.org/cgi-bin/locus.pl?locus=orf19.5130
orf19.5669	IPF11301	YKL065C	-1.24985	0.248219	-0.157175	0.0758685	unknown function	CandidaDB		0.551628		http://www.candidagenome.org/cgi-bin/locus.pl?locus=orf19.5669
orf19.7044	RIM15	YFL033C	-1.2494	0.13273	-0.163372	-0.158728	Protein kinase involved in the RIM pathway (by homology)	CandidaDB		0.660048		http://www.candidagenome.org/cgi-bin/locus.pl?locus=orf19.7044
orf19.7109	IPF5618	YGL242C	-1.24627	-0.0459194	0.0563932	0.421661	unknown function	CandidaDB		0.660483		http://www.candidagenome.org/cgi-bin/locus.pl?locus=orf19.7109
orf19.4579	IPF1022	YGR284C	-1.23569	-0.0441557	-0.607244	0.356442	similar to Saccharomyces cerevisiae Erv29p ER-Golgi transport vesicle protein (by homology)	CandidaDB		0.361694		http://www.candidagenome.org/cgi-bin/locus.pl?locus=orf19.4579
orf19.7328	IPF1980	(StaphnuClease)	-1.23378	-0.227606	-1.16361	-0.0714067	unknown function	CandidaDB	0.483897			http://www.candidagenome.org/cgi-bin/locus.pl?locus=orf19.7328
orf19.11074	IPF13100	YJL073W	-1.2267	-0.605798	-0.619755	0.0518704	unknown function	CandidaDB	0.247231	0.685884		http://www.candidagenome.org/cgi-bin/locus.pl?locus=orf19.11074
orf19.6217	SEC31	YDL195W	-1.22209	1.21461	0.216324	0.392073	Component of the COPII coat of ER-golgi vesicles (by homology).	CandidaDB		0.206936		http://www.candidagenome.org/cgi-bin/locus.pl?locus=orf19.6217
orf19.11823	SEC16.5eoc	YPL085W	-1.22126	0.384322	0.144395	0.0245016	Multidomain vesicle coat protein, 5-prime end (by homology)	CandidaDB		0.48485		http://www.candidagenome.org/cgi-bin/locus.pl?locus=orf19.11823
orf19.1317	IPF14554	YHR073W	-1.21848	-0.303263	-0.327433	-0.26679	similar to Saccharomyces cerevisiae Osh3p oxysterol-binding protein (by homology)	CandidaDB		-0.215119		http://www.candidagenome.org/cgi-bin/locus.pl?locus=orf19.1317
orf19.7823	IPF14730.5eoc	(None)	-1.21678	-0.636566	-1.06622	-0.197939	unknown function, 5-prime end	CandidaDB				http://www.candidagenome.org/cgi-bin/locus.pl?locus=orf19.7823
orf19.6598	WAL1	YOR181W	-1.20913	-0.178983	0.122685	-0.0100988	actin assembly factor (by homology)	CandidaDB		-0.452068		http://www.candidagenome.org/cgi-bin/locus.pl?locus=orf19.6598
orf19.7996	VMA6	YLR447C	-1.20614	0.644639	-0.241045	0.0385344	H+-ATPase V0 domain 36 KD subunit,vacuolar (by homology)	CandidaDB		0.540306		http://www.candidagenome.org/cgi-bin/locus.pl?locus=orf19.7996
orf19.2832	IPF14911	YNL152W	-1.20394	-0.735411	-0.276636	-0.00350817	unknown function	CandidaDB		0.307126		http://www.candidagenome.org/cgi-bin/locus.pl?locus=orf19.2832
orf19.3997	ADH1	YMR083W	-1.19832	-1.33231	-0.439475	0.183569	alcohol dehydrogenase (by homology)	CandidaDB	2.05612	0.725887		http://www.candidagenome.org/cgi-bin/locus.pl?locus=orf19.3997
orf19.5809	IPF20164.3eoc	(None)	-1.19194	2.66819	0.427645	-0.00157181	putative kynurenine aminotransferase, 3-prime end (by homology)	CandidaDB				http://www.candidagenome.org/cgi-bin/locus.pl?locus=orf19.5809
orf19.7537	IPF345	YNL271C	-1.17923	0.129411	-0.151577	-0.143095	FH1/FH2 involved in cytokinesis and polarity (by homology)	CandidaDB		0.057204		http://www.candidagenome.org/cgi-bin/locus.pl?locus=orf19.7537
orf19.6082	IPF4606	YML048W	-1.1782	-1.20522	-0.107992	0.350094	unknown Function	CandidaDB		0.239992		http://www.candidagenome.org/cgi-bin/locus.pl?locus=orf19.6082
orf19.1220	RVS167	YDR388W	-1.1777	0.707976	0.0593577	-0.0513974	(putative) cytoskeletal protein (by homology)	CandidaDB		0.361849		http://www.candidagenome.org/cgi-bin/locus.pl?locus=orf19.1220
orf19.6000	CDR1	YOR153W	-1.16797	-1.51413	-0.33136	-0.176239	CDR1	CandidaDB		-0.236186		http://www.candidagenome.org/cgi-bin/locus.pl?locus=orf19.6000
orf19.10195	NULL	(NotinCDB)	-1.16567	-0.612516	-0.0741306	-0.357724	NULL	CandidaDB				http://www.candidagenome.org/cgi-bin/locus.pl?locus=orf19.10195
orf19.2296	IPF14282	(muCinlike)	-1.1564	0.264401	-0.0154222	0.330502	Similar to mucin proteins (by homology)	CandidaDB	0.440414			http://www.candidagenome.org/cgi-bin/locus.pl?locus=orf19.2296
orf19.4346	NULL	(NotinCDB)	-1.14728	0.212628	-0.165617	-0.24309	NULL	CandidaDB				http://www.candidagenome.org/cgi-bin/locus.pl?locus=orf19.4346
orf19.3737	IPF4721	YPL070W	-1.14536	0.00274061	-0.840871	0.132572	unknown Function	CandidaDB	0.303815	-0.291211		http://www.candidagenome.org/cgi-bin/locus.pl?locus=orf19.3737
orf19.6403	SLS1	YOL031C	-1.13356	-0.0668229	-0.242651	0.216134	Endoplasmic translocation machinery by homology	CandidaDB		0.00698993		http://www.candidagenome.org/cgi-bin/locus.pl?locus=orf19.6403
orf19.6176	SEC61	YLR378C	-1.12349	0.283799	-0.662148	0.0352814	ER protein-translocation complex subunit	CandidaDB	0.570987	0.488026		http://www.candidagenome.org/cgi-bin/locus.pl?locus=orf19.6176
orf19.2888	IPF10431	(None)	-1.11858	-1.40755	-0.879697	-0.0468718	unknown function	CandidaDB				http://www.candidagenome.org/cgi-bin/locus.pl?locus=orf19.2888
orf19.851	IPF14030	YJR061W	-1.11419	0.671664	0.281937	0.159518	unknown function	CandidaDB		0.171368		http://www.candidagenome.org/cgi-bin/locus.pl?locus=orf19.851
orf19.9738	GDH2	YDL215C	-1.10716	-0.769176	-0.8244	-0.132842	NAD-specific glutamate dehydrogenase (NAD) (by homology)	CandidaDB	1.13303	0.427919		http://www.candidagenome.org/cgi-bin/locus.pl?locus=orf19.9738
orf19.6327	IPF5726	(None)	-1.10574	-0.0133783	-0.575119	0.209951	unknown function	CandidaDB				http://www.candidagenome.org/cgi-bin/locus.pl?locus=orf19.6327
orf19.4950	AKR1	YDR264C	-1.10201	-0.469342	-0.576434	0.198372	ankyrin repeat-containing protein by homology	CandidaDB		0.628162		http://www.candidagenome.org/cgi-bin/locus.pl?locus=orf19.4950
orf19.3133	GUT2	YIL155C	-1.09485	-0.448824	0.224244	-0.183894	Glycerol-3-phosphate dehydrogenase, mitochondrial (by homology)	CandidaDB				http://www.candidagenome.org/cgi-bin/locus.pl?locus=orf19.3133
orf19.5037	IPF17054	(None)	-1.08867	0.489513	-0.588074	-0.281007	unknown function	CandidaDB				http://www.candidagenome.org/cgi-bin/locus.pl?locus=orf19.5037
orf19.5546	SAC6.3f	YDR129C	-1.08014	-1.13041	-0.843638	-0.116363	Actin filament bundling protein, fimbrin, 3-prime end (by homology)	CandidaDB		0.458556		http://www.candidagenome.org/cgi-bin/locus.pl?locus=orf19.5546
orf19.2863	NULL	(NotinCDB)	-1.07558	-0.807256	-0.134061	0.129372	NULL	CandidaDB				http://www.candidagenome.org/cgi-bin/locus.pl?locus=orf19.2863
orf19.3219	IPF14538	YOR137C	-1.07339	-0.90578	-0.849739	-0.146522	unknown function	CandidaDB		0.0717244		http://www.candidagenome.org/cgi-bin/locus.pl?locus=orf19.3219
orf19.4662	IPF4828	YPL089C	-1.06448	-1.04721	-0.403212	-4.86299	by homology to S. cerevisiae YEAST TRANSCRIPTION FACTOR RLM1	CandidaDB		-0.955809	-1.24286	http://www.candidagenome.org/cgi-bin/locus.pl?locus=orf19.4662
orf19.6474	IPF12662	(None)	-1.0602	-0.675252	-1.0468	-0.0462576	unknown function	CandidaDB				http://www.candidagenome.org/cgi-bin/locus.pl?locus=orf19.6474
orf19.4679	AGP2	YBR132C	-1.05537	-0.666498	0.392919	0.302334	amino-acid permease (by homology)	CandidaDB	-0.13547	0.447272	-1.20163	http://www.candidagenome.org/cgi-bin/locus.pl?locus=orf19.4679
orf19.7788	YAK1.5f	YJL141C	-1.04476	0.0552777	0.269807	-0.00979216	serine/threonine protein kinase, 5-prime end (by homology)	CandidaDB	-1.04358			http://www.candidagenome.org/cgi-bin/locus.pl?locus=orf19.7788
orf19.20	IPF3870	YOR014W	-1.04467	-0.994977	-0.293354	-0.0611065	similar to Saccharomyces cerevisiae Rts1p potential regulatory subunit of protein phosphatase 2A	CandidaDB		-0.339517		http://www.candidagenome.org/cgi-bin/locus.pl?locus=orf19.20
orf19.6091	RIM8	YGL046W	-1.0358	0.161271	-0.307156	-0.0712203	regulator of PH response	CandidaDB		0.637109		http://www.candidagenome.org/cgi-bin/locus.pl?locus=orf19.6091
orf19.11750	PUT1	YLR142W	-1.0354	0.389819	-0.525096	-0.137402	proline oxidase (by homology)	CandidaDB			-1.58496	http://www.candidagenome.org/cgi-bin/locus.pl?locus=orf19.11750
orf19.9755	IPF19934	(None)	-1.03169	1.09083	-0.491153	-0.142854	unknown function	CandidaDB				http://www.candidagenome.org/cgi-bin/locus.pl?locus=orf19.9755
orf19.2028	MXR1	YER042W	-1.03002	-1.12175	-0.891197	-0.192948	methionine sulfoxide reductase	CandidaDB	0.481104	0.218151		http://www.candidagenome.org/cgi-bin/locus.pl?locus=orf19.2028
orf19.4867	IPF10223	YJL187C	-1.02708	-0.219604	-1.11688	0.0728713	putative serine/threonine kinase	CandidaDB		0.11677		http://www.candidagenome.org/cgi-bin/locus.pl?locus=orf19.4867
orf19.4991	NULL	(NotinCDB)	-1.02039	0.00643829	0.306848	0.207622	NULL	CandidaDB				http://www.candidagenome.org/cgi-bin/locus.pl?locus=orf19.4991
orf19.442	NULL	(NotinCDB)	-1.0183	-0.228326	0.149822	-0.115811	NULL	CandidaDB				http://www.candidagenome.org/cgi-bin/locus.pl?locus=orf19.442
orf19.6141	IPF9240	YHR094C	1.006	1.85731	0.725077	0.161658	probable permease	CandidaDB		0.760296		http://www.candidagenome.org/cgi-bin/locus.pl?locus=orf19.6141
orf19.8537	NULL	(NotinCDB)	1.05171	1.37257	-0.075192	-0.146495	NULL	CandidaDB				http://www.candidagenome.org/cgi-bin/locus.pl?locus=orf19.8537
orf19.3553	IPF17139	YKR081C	1.05319	-0.764153	0.127954	0.264555	unknown function	CandidaDB		0.160685		http://www.candidagenome.org/cgi-bin/locus.pl?locus=orf19.3553
orf19.4093	IPF2093	YGR103W	1.06642	-0.223696	0.649392	-0.0970717	nuclear protein of unknown function (by homology)	CandidaDB		0.351995		http://www.candidagenome.org/cgi-bin/locus.pl?locus=orf19.4093
orf19.5106	DIP2	DIP2	1.06987	0.0322416	0.492277	0.082248	beta transducin or WD domain protein	CandidaDB				http://www.candidagenome.org/cgi-bin/locus.pl?locus=orf19.5106
orf19.7593	ASP1	YDR321W	1.08053	-0.0376158	0.128674	0.0810352	L-asparaginase (by homology)	CandidaDB		0.690533		http://www.candidagenome.org/cgi-bin/locus.pl?locus=orf19.7593
orf19.3040	IPF3589	YBR177C	1.08655	0.553476	1.07495	-0.0280016	putative alcohol acyl transferase (by homology)	CandidaDB		0.447131		http://www.candidagenome.org/cgi-bin/locus.pl?locus=orf19.3040
orf19.2942	DIP51.3f	YPL265W	1.08841	-0.471962	0.105235	0.0326315	dicarboxylic amino acid permease, 3-prime end (by homology)	CandidaDB		0.154142		http://www.candidagenome.org/cgi-bin/locus.pl?locus=orf19.2942
orf19.5759	SNQ2	YDR011W	1.08959	0.811619	0.666268	0.0106007	multidrug resistance protein (by homology)	CandidaDB		0.107998		http://www.candidagenome.org/cgi-bin/locus.pl?locus=orf19.5759
orf19.172	IPF16126	YNL113W	1.11465	-0.936088	-0.0885406	0.180909	similar to Saccharomyces cerevisiae Rpc19p DNA-directed RNA polymerase I,III 16 KD subunit (by homology)	CandidaDB		-0.0351547		http://www.candidagenome.org/cgi-bin/locus.pl?locus=orf19.172
orf19.6989	IPF4531	YPR112C	1.12419	0.0730312	0.223126	-0.271471	unknown function	CandidaDB		-0.305825		http://www.candidagenome.org/cgi-bin/locus.pl?locus=orf19.6989
orf19.813	NULL	(None)	1.12887	-2.26134	0.284347	0.267005	NULL	CandidaDB				http://www.candidagenome.org/cgi-bin/locus.pl?locus=orf19.813
orf19.6007	IPF8302	YJL196C	1.14714	-1.46244	0.687617	-0.176665	unknown function	CandidaDB		0.374496		http://www.candidagenome.org/cgi-bin/locus.pl?locus=orf19.6007
orf19.3874	IPF13228	(None)	1.16795	-2.8593	-0.0758651	-0.209681	unknown function	CandidaDB				http://www.candidagenome.org/cgi-bin/locus.pl?locus=orf19.3874
orf19.5832	HPT1	YDR399W	1.19357	0.284992	0.129739	0.133059	hypoxanthine guanine phosphoribosy transferase(by homology)	CandidaDB		0.616424		http://www.candidagenome.org/cgi-bin/locus.pl?locus=orf19.5832
orf19.5753	STL1	YDR536W	1.19938	0.834223	0.69855	0.630203	sugar transporter (by homology)	CandidaDB		0.579922		http://www.candidagenome.org/cgi-bin/locus.pl?locus=orf19.5753
orf19.7769	CDC20	YGL116W	1.24545	-0.324928	1.14061	-0.025018	anaphase promoting complex subunit (by homology)	CandidaDB		0.603841		http://www.candidagenome.org/cgi-bin/locus.pl?locus=orf19.7769
orf19.3478	NIP7	YPL211W	1.24672	-0.185897	0.518771	-0.0810597	required for efficient 60S ribosome subunit biogenesis (by homology)	CandidaDB		0.577408		http://www.candidagenome.org/cgi-bin/locus.pl?locus=orf19.3478
orf19.6124	IPF9108	YLR131C	1.25556	0.612949	1.34001	-0.098677	similar to Saccharomyces cerevisiae Ace2p transcription factor (by homology)	CandidaDB		0.548195		http://www.candidagenome.org/cgi-bin/locus.pl?locus=orf19.6124
orf19.5208	IPF18608.3f	YIL103W	1.26048	-0.352535	0.195577	0.0474864	unknown function, 3-prime end	CandidaDB		0.532825		http://www.candidagenome.org/cgi-bin/locus.pl?locus=orf19.5208
orf19.4381	VTC3	YFL004W	1.26066	0.863718	0.862531	0.0446653	putative polyphosphate synthetase (by homology)	CandidaDB	0.639955	0.57159		http://www.candidagenome.org/cgi-bin/locus.pl?locus=orf19.4381
orf19.3962	HAS1	YMR290C	1.26679	-0.218334	0.25214	0.218063	ATP-DEPENDENT RNA HELICASE (by homology)	CandidaDB		0.461462	1.1375	http://www.candidagenome.org/cgi-bin/locus.pl?locus=orf19.3962
orf19.2185	IPF12457	YGL111W	1.27536	-0.353916	0.350107	-0.0354804	unknown function	CandidaDB		0.208561		http://www.candidagenome.org/cgi-bin/locus.pl?locus=orf19.2185
orf19.655	PHO84	YML123C	1.28336	-0.738156	0.946395	0.298482	high-affinity inorganic phosphate/H+ symporter by homology	CandidaDB	1.77539			http://www.candidagenome.org/cgi-bin/locus.pl?locus=orf19.655
orf19.9534	GIT2	YCR098C	1.29841	-1.50908	0.711307	-0.185918	glycerophosphoinositol transporter (by homology)	CandidaDB		0.291592		http://www.candidagenome.org/cgi-bin/locus.pl?locus=orf19.9534
orf19.5360	RPC11	YDR045C	1.34564	-0.178318	-0.0128692	0.0304852	RNA polymerase III C11 subunit (by homology)	CandidaDB	0.0108899	0.343122		http://www.candidagenome.org/cgi-bin/locus.pl?locus=orf19.5360
orf19.6578	IPF1634	YML123C	1.34674	-0.0067867	-0.101798	-0.138905	unknown function	CandidaDB	1.16089	0.415759		http://www.candidagenome.org/cgi-bin/locus.pl?locus=orf19.6578
orf19.6119	IPF9116	(None)	1.43616	0.852351	0.922948	-0.472602	unknown function	CandidaDB				http://www.candidagenome.org/cgi-bin/locus.pl?locus=orf19.6119
orf19.3629	IPF10835	YER124C	1.44706	0.0161679	-0.033393	-0.288361	unknown function	CandidaDB		-0.0368298		http://www.candidagenome.org/cgi-bin/locus.pl?locus=orf19.3629
orf19.9097	IPF8257	(None)	1.45899	-0.204308	1.32894	-0.0826105	unknown function	CandidaDB				http://www.candidagenome.org/cgi-bin/locus.pl?locus=orf19.9097
orf19.9988	IPF14850	(None)	1.46136	0.638533	0.376293	-0.0652083	Hypothetical protein	CandidaDB	0.365008			http://www.candidagenome.org/cgi-bin/locus.pl?locus=orf19.9988
orf19.5487	CDC46	YLR274W	1.46219	0.605139	0.786525	0.0256838	cell division control protein (by homology)	CandidaDB		0.511142		http://www.candidagenome.org/cgi-bin/locus.pl?locus=orf19.5487
orf19.3618	YWP1	YAR050W	1.50462	0.194734	1.36767	-0.230083	putative cell wall protein (by homology)	CandidaDB	2.51853	0.0879889		http://www.candidagenome.org/cgi-bin/locus.pl?locus=orf19.3618
orf19.3895	CHT2	YLR286C	1.6899	-0.762087	0.265595	0.336598	chitinase 2 precursor	CandidaDB	0.924751			http://www.candidagenome.org/cgi-bin/locus.pl?locus=orf19.3895
orf19.5267	IPF2053	(None)	1.69142	0.429534	0.0832911	0.169987	unknown function	CandidaDB	1.22655			http://www.candidagenome.org/cgi-bin/locus.pl?locus=orf19.5267
orf19.4456	GAP4	YKR039W	1.70356	1.3142	-0.132503	0.221256	General amino acid permease (by homology)	CandidaDB			1.26303	http://www.candidagenome.org/cgi-bin/locus.pl?locus=orf19.4456
orf19.12211	IPF13921	(GAA1-like)	1.80231	0.250619	0.115727	0.214485	Unknown function	CandidaDB				http://www.candidagenome.org/cgi-bin/locus.pl?locus=orf19.12211
orf19.2496	FRP1	YNR002C	1.94189	2.17188	-0.292228	0.0814603	member of the FRP family of proteins related to Yarrowia lipolytica glyoxylate pathway regulator Gpr1p and Saccharomyces cerevisiae Fun34p	CandidaDB			-1.32193	http://www.candidagenome.org/cgi-bin/locus.pl?locus=orf19.2496
orf19.5664	IPF5287	YMR032W	2.06535	0.159379	1.73233	0.450921	signal transduction protein (by homology)	CandidaDB				http://www.candidagenome.org/cgi-bin/locus.pl?locus=orf19.5664
orf19.6008	IPF8301	YLL032C	2.0867	0.291159	1.9174	-0.41823	unknown function	CandidaDB				http://www.candidagenome.org/cgi-bin/locus.pl?locus=orf19.6008
orf19.4211	FET33	YMR058W	2.17189	-0.931647	2.40773	0.448192	cell surface ferroxidase (by homology)	CandidaDB	2.97338	0.639355		http://www.candidagenome.org/cgi-bin/locus.pl?locus=orf19.4211
orf19.1507	IPF17676	YBR158W	2.17718	-0.724745	-0.23576	-0.335222	similar to Saccharomyces cerevisiae Cst13p involved in chromosome stability (by homology)	CandidaDB		0.485499		http://www.candidagenome.org/cgi-bin/locus.pl?locus=orf19.1507
orf19.9987	IPF14109	(None)	2.19443	-1.19722	2.31	-0.010929	unknown function	CandidaDB	0.862732			http://www.candidagenome.org/cgi-bin/locus.pl?locus=orf19.9987
orf19.3893	SCW11.3eoc	YGL028C	2.27767	0.599348	0.0505943	0.801905	glucanase gene family member, 3-prime end (by homology)	CandidaDB	1.151	0.00992684		http://www.candidagenome.org/cgi-bin/locus.pl?locus=orf19.3893
orf19.4910	IPF9616	(None)	2.73971	0.136917	0.131825	0.254042	unknown function	CandidaDB				http://www.candidagenome.org/cgi-bin/locus.pl?locus=orf19.4910
orf19.7586	CHT3	YLR286C	3.82091	-0.18722	-0.341626	0.320674	chitinase 3 precursor	CandidaDB		0.208186		http://www.candidagenome.org/cgi-bin/locus.pl?locus=orf19.7586

## Sheet: 3. wt- vs wt+  (p<0.05, R<>2)
Gene ID	##	ID	Cluster	R(wt-/wt+)	rawp	Bonferroni	Oligo_ID	Gene symbol	CandidaDB accession	Description	Assembly6 ORF name	Sequence	Xhyb report	BLAST gene homology image	CandidaDB	CGD
orf19.4082	4150	CA04361_01	214	-6.25065	0	0	CA04361_01	CaDDR48	CA4336	stress protein (by homology)	orf6.6854	Sequence	Oligo report	Gene image	CandidaDB	http://www.candidagenome.org/cgi-bin/locus.pl?locus=orf19.4082
orf19.8292	1980	CA04133_01	213	-6.09064	0	0	CA04133_01	IPF3964	CA4111	unknown function	orf6.6568	Sequence	Oligo report	Gene image	CandidaDB	http://www.candidagenome.org/cgi-bin/locus.pl?locus=orf19.8292
orf19.711	3082	CA01500_01	194	-5.98199	0	0	CA01500_01	IPF18732	CA1234	histidine-rich glycoprotein precursor (by homology)	orf6.2632	Sequence	Oligo report	Gene image	CandidaDB	http://www.candidagenome.org/cgi-bin/locus.pl?locus=orf19.711
orf19.711	4502	CA00558_01	195	-5.75426	0	0	CA00558_01	NULL		NULL	orf6.522	Sequence	Oligo report	Gene image	CandidaDB	http://www.candidagenome.org/cgi-bin/locus.pl?locus=orf19.711
orf19.753	1393	CA02118_01	32	-5.49238	1.35761e-06	0.00938376	CA02118_01	IPF13407	CA1926	Unknown function	orf6.3632	Sequence	Oligo report	Gene image	CandidaDB	http://www.candidagenome.org/cgi-bin/locus.pl?locus=orf19.753
orf19.2061	2035	CA04907_01	31	-5.22051	2.05179e-10	1.4182e-06	CA04907_01	NULL		NULL	orf6.7494	Sequence	Oligo report	Gene image	CandidaDB	http://www.candidagenome.org/cgi-bin/locus.pl?locus=orf19.2061
orf19.6595	1090	CA03865_01	30	-5.00779	9.98369e-09	6.90073e-05	CA03865_01	CaRTA4	CA3835	Protein involved in 7-aminocholesterol resistance (by homology)	orf6.6207	Sequence	Oligo report	Gene image	CandidaDB	http://www.candidagenome.org/cgi-bin/locus.pl?locus=orf19.6595
orf19.11225	6656	CA03317_01	89	-4.27589	0	0	CA03317_01	IPF4724	CA3253	unknown Function	orf6.5470	Sequence	Oligo report	Gene image	CandidaDB	http://www.candidagenome.org/cgi-bin/locus.pl?locus=orf19.11225
orf19.3932	3052	CA01115_01	193	-4.27144	0	0	CA01115_01	IPF16253	CA0782	unknown function	orf6.1914	Sequence	Oligo report	Gene image	CandidaDB	http://www.candidagenome.org/cgi-bin/locus.pl?locus=orf19.3932
orf19.7350	4238	CA05804_01	216	-4.14779	0	0	CA05804_01	NULL		NULL	orf6.8511	Sequence	Oligo report	Gene image	CandidaDB	http://www.candidagenome.org/cgi-bin/locus.pl?locus=orf19.7350
orf19.3282	2073	CA05603_01	90	-4.13933	7.49178e-13	5.17832e-09	CA05603_01	IPF300	CA5470	unknown function	orf6.8282	Sequence	Oligo report	Gene image	CandidaDB	http://www.candidagenome.org/cgi-bin/locus.pl?locus=orf19.3282
orf19.7350	781	CA05803_01	215	-4.09714	0	0	CA05803_01	IPF7109	CA5650	unknown function	orf6.8510	Sequence	Oligo report	Gene image	CandidaDB	http://www.candidagenome.org/cgi-bin/locus.pl?locus=orf19.7350
orf19.7330	3806	CA05713_01	210	-4.08493	0	0	CA05713_01	CaPET18	CA5566	Putative transcriptional regulator (by homology)	orf6.8411	Sequence	Oligo report	Gene image	CandidaDB	http://www.candidagenome.org/cgi-bin/locus.pl?locus=orf19.7330
orf19.6840	1995	CA04474_01	114	-3.74878	0	0	CA04474_01	IPF3535	CA4443	unknown function	orf6.6989	Sequence	Oligo report	Gene image	CandidaDB	http://www.candidagenome.org/cgi-bin/locus.pl?locus=orf19.6840
orf19.13071	1449	CA02867_01	203	-3.72966	0	0	CA02867_01	IPF15013	CA2761	pyruvate decarboxylase regulatory protein (by homology)	orf6.4785	Sequence	Oligo report	Gene image	CandidaDB	http://www.candidagenome.org/cgi-bin/locus.pl?locus=orf19.13071
orf19.5741	3859	CA00440_01	212	-3.66841	9.96758e-13	6.88959e-09	CA00440_01	CaALS1.3eoc	CA0316	agglutinin-like protein, 3-prime end		Sequence	Oligo report		CandidaDB	http://www.candidagenome.org/cgi-bin/locus.pl?locus=orf19.5741
orf19.246	5832	CA00580_01	48	-3.57596	0	0	CA00580_01	IPF10495	CA0129	unknown function	orf6.601	Sequence	Oligo report	Gene image	CandidaDB	http://www.candidagenome.org/cgi-bin/locus.pl?locus=orf19.246
orf19.6877	3737	CA04613_01	199	-3.35059	0	0	CA04613_01	IPF19801	CA4566	unknown function	orf6.7141	Sequence	Oligo report	Gene image	CandidaDB	http://www.candidagenome.org/cgi-bin/locus.pl?locus=orf19.6877
orf19.6928	5197	CA10090_01	198	-3.31997	0	0	CA10090_01	CaSAP9	CA4700	aspartyl proteinase 9 (by homology)		Sequence	Oligo report		CandidaDB	http://www.candidagenome.org/cgi-bin/locus.pl?locus=orf19.6928
orf19.7329	349	CA05712_01	209	-3.12511	0	0	CA05712_01	CaQRI8	CA5565	E2 ubiquitin-conjugation enzyme (by homology)	orf6.8410	Sequence	Oligo report	Gene image	CandidaDB	http://www.candidagenome.org/cgi-bin/locus.pl?locus=orf19.7329
orf19.6920	1150	CA04648_01	87	-3.1103	1.87752e-10	1.29774e-06	CA04648_01	IPF2195	CA4601	unknown function	orf6.7184	Sequence	Oligo report	Gene image	CandidaDB	http://www.candidagenome.org/cgi-bin/locus.pl?locus=orf19.6920
orf19.7054	5097	CA05794_01	88	-2.98024	0	0	CA05794_01	NULL		NULL	orf6.8499	Sequence	Oligo report	Gene image	CandidaDB	http://www.candidagenome.org/cgi-bin/locus.pl?locus=orf19.7054
orf19.7445	2508	CA05883_01	200	-2.91709	2.22045e-16	1.53477e-12	CA05883_01	IPF2878	CA5735	unknown function	orf6.8605	Sequence	Oligo report	Gene image	CandidaDB	http://www.candidagenome.org/cgi-bin/locus.pl?locus=orf19.7445
orf19.7339	3810	CA05721_01	49	-2.87579	1.87728e-07	0.00129758	CA05721_01	CaBGL22	CA5572	endo-beta-1,3-glucanase (by homology)	orf6.8420	Sequence	Oligo report	Gene image	CandidaDB	http://www.candidagenome.org/cgi-bin/locus.pl?locus=orf19.7339
orf19.4255	6183	CA02342_01	135	-2.69987	6.43927e-11	4.45082e-07	CA02342_01	CaECM331	CA2181	Involved in cell wall biogenesis and architecture (by homology)	orf6.3969	Sequence	Oligo report	Gene image	CandidaDB	http://www.candidagenome.org/cgi-bin/locus.pl?locus=orf19.4255
orf19.5459	2096	CA05965_01	122	-2.63069	6.97611e-11	4.82189e-07	CA05965_01	IPF4160	CA5804	unknown function	orf6.8695	Sequence	Oligo report	Gene image	CandidaDB	http://www.candidagenome.org/cgi-bin/locus.pl?locus=orf19.5459
orf19.5302	2076	CA05609_01	113	-2.59688	0	0	CA05609_01	NULL		NULL	orf6.8291	Sequence	Oligo report	Gene image	CandidaDB	http://www.candidagenome.org/cgi-bin/locus.pl?locus=orf19.5302
orf19.5995	3394	CA06255_01	137	-2.5794	2.91506e-09	2.01489e-05	CA06255_01	IPF4847	CA6069	unknown function	orf6.9042	Sequence	Oligo report	Gene image	CandidaDB	http://www.candidagenome.org/cgi-bin/locus.pl?locus=orf19.5995
orf19.2190	1843	CA01990_01	69	-2.53024	0	0	CA01990_01	CaVRP1	CA1773	verprolin (by homology)	orf6.3426	Sequence	Oligo report	Gene image	CandidaDB	http://www.candidagenome.org/cgi-bin/locus.pl?locus=orf19.2190
orf19.9467	4648	CA00625_01	202	-2.50941	0	0	CA00625_01	IPF15442	CA0188	unknown function	orf6.799	Sequence	Oligo report	Gene image	CandidaDB	http://www.candidagenome.org/cgi-bin/locus.pl?locus=orf19.9467
orf19.7504	2108	CA06011_01	111	-2.47516	0	0	CA06011_01	IPF407	CA5848	unknown function	orf6.8756	Sequence	Oligo report	Gene image	CandidaDB	http://www.candidagenome.org/cgi-bin/locus.pl?locus=orf19.7504
orf19.7359	4242	CA05812_01	176	-2.45853	0	0	CA05812_01	IPF14682	CA5657	putative transcription factor (by homology)	orf6.8519	Sequence	Oligo report	Gene image	CandidaDB	http://www.candidagenome.org/cgi-bin/locus.pl?locus=orf19.7359
orf19.4043	3162	CA02623_01	86	-2.40469	3.48859e-07	0.00241132	CA02623_01	IPF7217	CA2489	unknown function	orf6.4409	Sequence	Oligo report	Gene image	CandidaDB	http://www.candidagenome.org/cgi-bin/locus.pl?locus=orf19.4043
orf19.3127	3864	CA00385_01	73	-2.40151	3.99289e-09	2.75989e-05	CA00385_01	CaCZF1	CA3560	canal zinc finger protein		Sequence	Oligo report		CandidaDB	http://www.candidagenome.org/cgi-bin/locus.pl?locus=orf19.3127
orf19.6864	2001	CA04497_01	112	-2.38837	0	0	CA04497_01	IPF9833	CA4467	unknown function	orf6.7013	Sequence	Oligo report	Gene image	CandidaDB	http://www.candidagenome.org/cgi-bin/locus.pl?locus=orf19.6864
orf19.3615	3113	CA01894_01	136	-2.3844	8.16014e-13	5.64029e-09	CA01894_01	IPF5192	CA1675	unknown function	orf6.3285	Sequence	Oligo report	Gene image	CandidaDB	http://www.candidagenome.org/cgi-bin/locus.pl?locus=orf19.3615
orf19.5437	5548	CA05946_01	159	-2.37326	3.2907e-13	2.27453e-09	CA05946_01	CARHR2	CA5788	DL-glycerol phosphatase	orf6.8673	Sequence	Oligo report	Gene image	CandidaDB	http://www.candidagenome.org/cgi-bin/locus.pl?locus=orf19.5437
orf19.12512	6575	CA01917_01	37	-2.34921	0	0	CA01917_01	IPF15681	CA1698	unknown function	orf6.3322	Sequence	Oligo report	Gene image	CandidaDB	http://www.candidagenome.org/cgi-bin/locus.pl?locus=orf19.12512
orf19.1727	6560	CA01866_01	183	-2.33987	2.71598e-06	0.0187728	CA01866_01	CaPMC1	CA1645	Ca2+-transporting P-type ATPase (by homology)	orf6.3238	Sequence	Oligo report	Gene image	CandidaDB	http://www.candidagenome.org/cgi-bin/locus.pl?locus=orf19.1727
orf19.3548.1	6452	CA00288_01	186	-2.33818	1.9984e-15	1.3813e-11	CA00288_01	NULL		Wh11=white colony-forming gene {white-opaque switching system}		Sequence	Oligo report		CandidaDB	http://www.candidagenome.org/cgi-bin/locus.pl?locus=orf19.3548.1
orf19.6420	2905	CA05220_01	184	-2.32471	5.07445e-07	0.00350746	CA05220_01	IPF1341	CA5112	Similarity to mucin proteins (by homology)	orf6.7834	Sequence	Oligo report	Gene image	CandidaDB	http://www.candidagenome.org/cgi-bin/locus.pl?locus=orf19.6420
orf19.1618	3858	CA10289_01	211	-2.31549	2.22045e-16	1.53477e-12	CA10289_01	CaGFA1	CA4016	glutamine:fructose-6-phosphateamidotransferase		Sequence	Oligo report		CandidaDB	http://www.candidagenome.org/cgi-bin/locus.pl?locus=orf19.1618
orf19.11659	1955	CA03767_01	70	-2.30949	0	0	CA03767_01	IPF11897	CA3733	unknown function	orf6.6077	Sequence	Oligo report	Gene image	CandidaDB	http://www.candidagenome.org/cgi-bin/locus.pl?locus=orf19.11659
orf19.6101	4553	CA03890_01	40	-2.30674	1.30013e-09	8.98649e-06	CA03890_01	NULL		NULL	orf6.6240	Sequence	Oligo report	Gene image	CandidaDB	http://www.candidagenome.org/cgi-bin/locus.pl?locus=orf19.6101
orf19.7456	6828	CA05894_01	51	-2.27097	0	0	CA05894_01	IPF2903	CA5747	unknown function	orf6.8616	Sequence	Oligo report	Gene image	CandidaDB	http://www.candidagenome.org/cgi-bin/locus.pl?locus=orf19.7456
orf19.2706	2173	CA00784_01	201	-2.26525	0	0	CA00784_01	CaCRH11	CA0375	Probable membrane protein (by homology)	orf6.1231	Sequence	Oligo report	Gene image	CandidaDB	http://www.candidagenome.org/cgi-bin/locus.pl?locus=orf19.2706
orf19.951	5942	CA05531_01	44	-2.25128	0	0	CA05531_01	IPF1548	CA5407	unknown function	orf6.8200	Sequence	Oligo report	Gene image	CandidaDB	http://www.candidagenome.org/cgi-bin/locus.pl?locus=orf19.951
orf19.7531	362	CA06033_01	101	-2.24245	0	0	CA06033_01	IPF351	CA5868	unknown function	orf6.8783	Sequence	Oligo report	Gene image	CandidaDB	http://www.candidagenome.org/cgi-bin/locus.pl?locus=orf19.7531
orf19.5799	5444	CA04171_01	120	-2.2359	6.76037e-10	4.67276e-06	CA04171_01	IPF20010	CA4154	unknown function	orf6.6633	Sequence	Oligo report	Gene image	CandidaDB	http://www.candidagenome.org/cgi-bin/locus.pl?locus=orf19.5799
orf19.4377	3862	CA00380_01	160	-2.23156	8.88178e-15	6.13909e-11	CA00380_01	CaKRE1	CA2589	secretory pathway protein		Sequence	Oligo report		CandidaDB	http://www.candidagenome.org/cgi-bin/locus.pl?locus=orf19.4377
orf19.909	5317	CA02326_01	119	-2.17606	7.24889e-10	5.01043e-06	CA02326_01	IPF4553	CA2167	unknown function	orf6.3947	Sequence	Oligo report	Gene image	CandidaDB	http://www.candidagenome.org/cgi-bin/locus.pl?locus=orf19.909
orf19.3298	4154	CA04654_01	121	-2.17357	0	0	CA04654_01	CaCCH1	CA4608	Calcium channel protein (by homology)	orf6.7193	Sequence	Oligo report	Gene image	CandidaDB	http://www.candidagenome.org/cgi-bin/locus.pl?locus=orf19.3298
orf19.12077	2061	CA05283_01	43	-2.12911	0	0	CA05283_01	IPF6032	CA5168	unknown function	orf6.7906	Sequence	Oligo report	Gene image	CandidaDB	http://www.candidagenome.org/cgi-bin/locus.pl?locus=orf19.12077
orf19.4135	2215	CA01482_01	39	-2.12176	1.24427e-08	8.60039e-05	CA01482_01	CaPRC2	CA1219	carboxypeptidase y precursor , serine-type protease (by homology)	orf6.2612	Sequence	Oligo report	Gene image	CandidaDB	http://www.candidagenome.org/cgi-bin/locus.pl?locus=orf19.4135
orf19.6658	4131	CA04289_01	64	-2.05414	2.22371e-09	1.53703e-05	CA04289_01	IPF2280	CA4264	unknown function	orf6.6767	Sequence	Oligo report	Gene image	CandidaDB	http://www.candidagenome.org/cgi-bin/locus.pl?locus=orf19.6658
orf19.4771	2729	CA02347_01	85	-2.03474	0	0	CA02347_01	IPF11667	CA2187	unknown function	orf6.3982	Sequence	Oligo report	Gene image	CandidaDB	http://www.candidagenome.org/cgi-bin/locus.pl?locus=orf19.4771
orf19.270	4847	CA01826_01	38	-2.01562	1.00236e-07	0.000692831	CA01826_01	NULL		NULL	orf6.3179	Sequence	Oligo report	Gene image	CandidaDB	http://www.candidagenome.org/cgi-bin/locus.pl?locus=orf19.270
orf19.7436	385	CA10180_01	110	-2.00506	1.17299e-11	8.10774e-08	CA10180_01	CaAAF1	CA5726	Adhesion and aggregation mediating surface antigen		Sequence	Oligo report		CandidaDB	http://www.candidagenome.org/cgi-bin/locus.pl?locus=orf19.7436
orf19.1344	5677	CA01505_01	71	-1.95856	3.06037e-11	2.11533e-07	CA01505_01	IPF19908	CA1242	unknown function	orf6.2644	Sequence	Oligo report	Gene image	CandidaDB	http://www.candidagenome.org/cgi-bin/locus.pl?locus=orf19.1344
orf19.4474	6601	CA02565_01	185	-1.94075	1.12319e-06	0.00776353	CA02565_01	IPF14379	CA2419	unknown function	orf6.4313	Sequence	Oligo report	Gene image	CandidaDB	http://www.candidagenome.org/cgi-bin/locus.pl?locus=orf19.4474
orf19.5250	5058	CA05090_01	33	-1.91	2.05399e-10	1.41972e-06	CA05090_01	IPF2027	CA4997	unknown function	orf6.7692	Sequence	Oligo report	Gene image	CandidaDB	http://www.candidagenome.org/cgi-bin/locus.pl?locus=orf19.5250
orf19.3829	3895	CA10174_01	204	-1.87215	0	0	CA10174_01	CaPHR1	CA4857	GPI-anchored pH responsive glycosyl transferase		Sequence	Oligo report		CandidaDB	http://www.candidagenome.org/cgi-bin/locus.pl?locus=orf19.3829
orf19.4044	5755	CA02624_01	36	-1.84377	3.01253e-08	0.000208226	CA02624_01	CaMUM2	CA2490	ubiquitin C-terminal hydrolase (by homology)	orf6.4410	Sequence	Oligo report	Gene image	CandidaDB	http://www.candidagenome.org/cgi-bin/locus.pl?locus=orf19.4044
orf19.2432	1764	CA00857_01	174	-1.84082	0	0	CA00857_01	IPF15604	CA0457	transcription factor (by homology)	orf6.1395	Sequence	Oligo report	Gene image	CandidaDB	http://www.candidagenome.org/cgi-bin/locus.pl?locus=orf19.2432
orf19.5191	3468	CA10250_01	188	-1.81414	1.86132e-06	0.0128654	CA10250_01	NULL		hypothetical protein		Sequence	Oligo report		CandidaDB	http://www.candidagenome.org/cgi-bin/locus.pl?locus=orf19.5191
orf19.2699	2341	CA03328_01	189	-1.81066	0	0	CA03328_01	CaABP1	CA3265	actin-binding protein (by homology)	orf6.5487	Sequence	Oligo report	Gene image	CandidaDB	http://www.candidagenome.org/cgi-bin/locus.pl?locus=orf19.2699
orf19.3635	2667	CA01566_01	52	-1.80798	1.64069e-09	1.13404e-05	CA01566_01	IPF14241	CA1312	unknown function	orf6.2750	Sequence	Oligo report	Gene image	CandidaDB	http://www.candidagenome.org/cgi-bin/locus.pl?locus=orf19.3635
orf19.7077	5092	CA05773_01	168	-1.77305	5.88288e-06	0.0406625	CA05773_01	CaFRE7	CA5621	Ferric reductase transmembrane component (by homology)	orf6.8476	Sequence	Oligo report	Gene image	CandidaDB	http://www.candidagenome.org/cgi-bin/locus.pl?locus=orf19.7077
orf19.3984	4638	CA00623_01	167	-1.75929	2.51593e-08	0.000173901	CA00623_01	IPF19142	CA0184	unknown function	orf6.794	Sequence	Oligo report	Gene image	CandidaDB	http://www.candidagenome.org/cgi-bin/locus.pl?locus=orf19.3984
orf19.2344	4019	CA02493_01	55	-1.755	8.65974e-15	5.98561e-11	CA02493_01	NULL		NULL	orf6.4207	Sequence	Oligo report	Gene image	CandidaDB	http://www.candidagenome.org/cgi-bin/locus.pl?locus=orf19.2344
orf19.2886	1300	CA10042_01	143	-1.75324	4.42755e-07	0.00306032	CA10042_01	CaERK1	CA0722	mitogen-activated protein kinase (FUS3 homolog)		Sequence	Oligo report		CandidaDB	http://www.candidagenome.org/cgi-bin/locus.pl?locus=orf19.2886
orf19.6905	3742	CA04635_01	115	-1.71124	1.26565e-14	8.7482e-11	CA04635_01	IPF2223	CA4587	unknown function	orf6.7169	Sequence	Oligo report	Gene image	CandidaDB	http://www.candidagenome.org/cgi-bin/locus.pl?locus=orf19.6905
orf19.12366	6524	CA01177_01	102	-1.68436	8.94457e-09	6.18249e-05	CA01177_01	IPF8854	CA0854	similar to Saccharomyces cerevisiae Mnn1p alpha-1,3-mannosyltransferase (by homology)	orf6.2025	Sequence	Oligo report	Gene image	CandidaDB	http://www.candidagenome.org/cgi-bin/locus.pl?locus=orf19.12366
orf19.4309	156	CA02770_01	177	-1.67591	2.94673e-11	2.03678e-07	CA02770_01	CaGRP2	CA2644	Reductase (by homology)	orf6.4614	Sequence	Oligo report	Gene image	CandidaDB	http://www.candidagenome.org/cgi-bin/locus.pl?locus=orf19.4309
orf19.2075	2034	CA04894_01	132	-1.67121	0	0	CA04894_01	CaDFG5	CA4822	Required for filamentous growth (by homology)	orf6.7480	Sequence	Oligo report	Gene image	CandidaDB	http://www.candidagenome.org/cgi-bin/locus.pl?locus=orf19.2075
orf19.1917	5656	CA01148_01	129	-1.66454	2.52667e-07	0.00174644	CA01148_01	IPF3348	CA0812	unknown function	orf6.1962	Sequence	Oligo report	Gene image	CandidaDB	http://www.candidagenome.org/cgi-bin/locus.pl?locus=orf19.1917
orf19.7115	3813	CA05738_01	118	-1.64553	3.21978e-08	0.000222551	CA05738_01	CaSAC7	CA5584	GAP for RHO1 by homology	orf6.8438	Sequence	Oligo report	Gene image	CandidaDB	http://www.candidagenome.org/cgi-bin/locus.pl?locus=orf19.7115
orf19.1658	6405	CA00635_01	125	-1.62936	2.49435e-06	0.0172409	CA00635_01	IPF19685	CA0198	unknown function	orf6.834	Sequence	Oligo report	Gene image	CandidaDB	http://www.candidagenome.org/cgi-bin/locus.pl?locus=orf19.1658
orf19.5025	1751	CA10064_01	56	-1.62425	0	0	CA10064_01	CaMET3	CA5238	ATP sulfurylase		Sequence	Oligo report		CandidaDB	http://www.candidagenome.org/cgi-bin/locus.pl?locus=orf19.5025
orf19.6109	1736	CA10135_01	175	-1.61951	2.38886e-09	1.65118e-05	CA10135_01	CaTUP1	CA3852	general transcription repressor		Sequence	Oligo report		CandidaDB	http://www.candidagenome.org/cgi-bin/locus.pl?locus=orf19.6109
orf19.993	4086	CA03562_01	105	-1.59038	0	0	CA03562_01	IPF20135	CA3523	unknown function	orf6.5805	Sequence	Oligo report	Gene image	CandidaDB	http://www.candidagenome.org/cgi-bin/locus.pl?locus=orf19.993
orf19.5876	2129	CA06360_01	133	-1.57865	2.1683e-06	0.0149873	CA06360_01	IPF1835	CA6160	unknown function	orf6.9161	Sequence	Oligo report	Gene image	CandidaDB	http://www.candidagenome.org/cgi-bin/locus.pl?locus=orf19.5876
orf19.10622	5873	CA04431_01	62	-1.56708	3.99943e-10	2.76441e-06	CA04431_01	IPF14362	CA4400	unknown function	orf6.6935	Sequence	Oligo report	Gene image	CandidaDB	http://www.candidagenome.org/cgi-bin/locus.pl?locus=orf19.10622
orf19.33	2358	CA03656_01	97	-1.55264	0	0	CA03656_01	NULL		NULL	orf6.5927	Sequence	Oligo report	Gene image	CandidaDB	http://www.candidagenome.org/cgi-bin/locus.pl?locus=orf19.33
orf19.7204	5077	CA05451_01	35	-1.55103	0	0	CA05451_01	IPF2130	CA5330	similar to 2-nitropropane dioxygenases	orf6.8104	Sequence	Oligo report	Gene image	CandidaDB	http://www.candidagenome.org/cgi-bin/locus.pl?locus=orf19.7204
orf19.633	5330	CA00534_01	65	-1.54512	4.13214e-06	0.0285613	CA00534_01	IPF11379	CA0081	unknown function	orf6.444	Sequence	Oligo report	Gene image	CandidaDB	http://www.candidagenome.org/cgi-bin/locus.pl?locus=orf19.633
orf19.4475	2286	CA02564_01	95	-1.53804	0	0	CA02564_01	CaMNT4	CA2418	putative mannosyltransferase	orf6.4312	Sequence	Oligo report	Gene image	CandidaDB	http://www.candidagenome.org/cgi-bin/locus.pl?locus=orf19.4475
orf19.2846	2318	CA02968_01	57	-1.53702	0	0	CA02968_01	IPF20118	CA2868	unknown function	orf6.4940	Sequence	Oligo report	Gene image	CandidaDB	http://www.candidagenome.org/cgi-bin/locus.pl?locus=orf19.2846
orf19.3865	3646	CA03171_01	63	-1.52542	5.38877e-06	0.0372472	CA03171_01	IPF6593	CA3101	similar to Saccharomyces cerevisiae Rfx1p DNA-binding protein (by homology)	orf6.5255	Sequence	Oligo report	Gene image	CandidaDB	http://www.candidagenome.org/cgi-bin/locus.pl?locus=orf19.3865
orf19.8001	1781	CA01194_01	109	-1.51388	2.09137e-09	1.44555e-05	CA01194_01	CaCNH1.3f	CA0878	Na+/H+ antiporter, 3-prime end (by homology)	orf6.2060	Sequence	Oligo report	Gene image	CandidaDB	http://www.candidagenome.org/cgi-bin/locus.pl?locus=orf19.8001
orf19.8737	6129	CA01589_01	126	-1.51378	7.49991e-11	5.18394e-07	CA01589_01	IPF13166.3eoc	CA0953	unknown function, 3-prime end	orf6.2787	Sequence	Oligo report	Gene image	CandidaDB	http://www.candidagenome.org/cgi-bin/locus.pl?locus=orf19.8737
orf19.10195	1923	CA03379_01	98	-1.50755	0	0	CA03379_01	CaDRS25.3eoc	CA3319	Probable ATPase, 3-prime end (by homology)	orf6.5554	Sequence	Oligo report	Gene image	CandidaDB	http://www.candidagenome.org/cgi-bin/locus.pl?locus=orf19.10195
orf19.1373	5620	CA11007_01	67	-1.50683	1.14575e-13	7.91943e-10	CA11007_01	NULL		NULL	orf6.1145	Sequence	Oligo report	Gene image	CandidaDB	http://www.candidagenome.org/cgi-bin/locus.pl?locus=orf19.1373
orf19.3438	6706	CA04047_01	83	-1.50561	1.64683e-08	0.000113829	CA04047_01	CaSCJ1	CA4025	Mitochondrial and ER import protein (by homology)	orf6.6467	Sequence	Oligo report	Gene image	CandidaDB	http://www.candidagenome.org/cgi-bin/locus.pl?locus=orf19.3438
orf19.5602	1911	CA03057_01	134	-1.504	1.20491e-08	8.32831e-05	CA03057_01	IPF19772	CA2969	unknown function	orf6.5070	Sequence	Oligo report	Gene image	CandidaDB	http://www.candidagenome.org/cgi-bin/locus.pl?locus=orf19.5602
orf19.7210	5080	CA05457_01	59	-1.49929	4.44089e-16	3.06954e-12	CA05457_01	NULL		NULL	orf6.8111	Sequence	Oligo report	Gene image	CandidaDB	http://www.candidagenome.org/cgi-bin/locus.pl?locus=orf19.7210
orf19.7229	4224	CA05473_01	96	-1.48884	1.8423e-12	1.2734e-08	CA05473_01	CaIML2	CA5353	unknown function	orf6.8129	Sequence	Oligo report	Gene image	CandidaDB	http://www.candidagenome.org/cgi-bin/locus.pl?locus=orf19.7229
orf19.4077	3099	CA01846_01	179	-1.46883	1.4789e-08	0.000102221	CA01846_01	IPF2067	CA1619	Required for mannosylation of sphingolipids (by homology)	orf6.3203	Sequence	Oligo report	Gene image	CandidaDB	http://www.candidagenome.org/cgi-bin/locus.pl?locus=orf19.4077
orf19.2844	5773	CA02966_01	72	-1.46155	1.66109e-08	0.000114815	CA02966_01	IPF11688	CA2867	similar to Saccharomyces cerevisiae Apl4p AP-1 complex subunit, gamma-adaptin, 94 KD (by homology)	orf6.4938	Sequence	Oligo report	Gene image	CandidaDB	http://www.candidagenome.org/cgi-bin/locus.pl?locus=orf19.2844
orf19.6114	4549	CA03882_01	190	-1.46053	4.67626e-13	3.23223e-09	CA03882_01	NULL		NULL	orf6.6227	Sequence	Oligo report	Gene image	CandidaDB	http://www.candidagenome.org/cgi-bin/locus.pl?locus=orf19.6114
orf19.2772	6299	CA04142_01	76	-1.46001	4.4844e-06	0.0309962	CA04142_01	IPF11952	CA4118	similar to Saccharomyces cerevisiae Hos3p putative histone deacetylase (by homology)	orf6.6580	Sequence	Oligo report	Gene image	CandidaDB	http://www.candidagenome.org/cgi-bin/locus.pl?locus=orf19.2772
orf19.6459	6689	CA03710_01	60	-1.44204	2.40375e-06	0.0166148	CA03710_01	CaDPP3	CA3668	Diacylglycerol Pyrophosphate Phosphatase by homology	orf6.6000	Sequence	Oligo report	Gene image	CandidaDB	http://www.candidagenome.org/cgi-bin/locus.pl?locus=orf19.6459
orf19.2209	3573	CA02086_01	163	-1.43725	1.55431e-15	1.07434e-11	CA02086_01	IPF5479	CA1883	unknown function	orf6.3575	Sequence	Oligo report	Gene image	CandidaDB	http://www.candidagenome.org/cgi-bin/locus.pl?locus=orf19.2209
orf19.215	170	CA03100_01	50	-1.42917	1.19238e-13	8.24173e-10	CA03100_01	IPF13202	CA3033	unknown function	orf6.5158	Sequence	Oligo report	Gene image	CandidaDB	http://www.candidagenome.org/cgi-bin/locus.pl?locus=orf19.215
orf19.12536	3945	CA01392_01	100	-1.42094	0	0	CA01392_01	IPF12312	CA1099	unknown function	orf6.2428	Sequence	Oligo report	Gene image	CandidaDB	http://www.candidagenome.org/cgi-bin/locus.pl?locus=orf19.12536
orf19.4166	6269	CA03754_01	91	-1.41491	0	0	CA03754_01	IPF6203	CA3716	unknown function	orf6.6060	Sequence	Oligo report	Gene image	CandidaDB	http://www.candidagenome.org/cgi-bin/locus.pl?locus=orf19.4166
orf19.5457	2095	CA05963_01	42	-1.40091	3.23407e-10	2.23539e-06	CA05963_01	IPF4163	CA5803	unknown function	orf6.8693	Sequence	Oligo report	Gene image	CandidaDB	http://www.candidagenome.org/cgi-bin/locus.pl?locus=orf19.5457
orf19.6706	5003	CA04327_01	82	-1.40026	3.23438e-10	2.23561e-06	CA04327_01	CaGYP7	CA4306	GTPase activating protein (by homology)	orf6.6815	Sequence	Oligo report	Gene image	CandidaDB	http://www.candidagenome.org/cgi-bin/locus.pl?locus=orf19.6706
orf19.4134	5672	CA01483_01	68	-1.39707	4.86398e-09	3.36199e-05	CA01483_01	IPF14985	CA1220	unknown function	orf6.2613	Sequence	Oligo report	Gene image	CandidaDB	http://www.candidagenome.org/cgi-bin/locus.pl?locus=orf19.4134
orf19.1144	5254	CA01259_01	161	-1.38244	1.04231e-08	7.20446e-05	CA01259_01	IPF13166.3eoc	CA0953	unknown function, 3-prime end	orf6.2172	Sequence	Oligo report	Gene image	CandidaDB	http://www.candidagenome.org/cgi-bin/locus.pl?locus=orf19.1144
orf19.8085	5223	CA00873_01	116	-1.36377	2.09956e-09	1.45121e-05	CA00873_01	IPF2580	CA0475	unknown function	orf6.1424	Sequence	Oligo report	Gene image	CandidaDB	http://www.candidagenome.org/cgi-bin/locus.pl?locus=orf19.8085
orf19.1395	2168	CA00763_01	53	-1.35939	3.76905e-08	0.000260517	CA00763_01	IPF2535	CA0355	unknown function	orf6.1186	Sequence	Oligo report	Gene image	CandidaDB	http://www.candidagenome.org/cgi-bin/locus.pl?locus=orf19.1395
orf19.3330	4758	CA10031_01	84	-1.35022	7.11419e-10	4.91733e-06	CA10031_01	IPF11512	CA2933	similar to Saccharomyces cerevisiae Rho4p GTP-binding protein of the rho family (by homology)		Sequence	Oligo report		CandidaDB	http://www.candidagenome.org/cgi-bin/locus.pl?locus=orf19.3330
orf19.7300	4662	CA05687_01	78	-1.34226	2.39827e-07	0.00165768	CA05687_01	IPF2830	CA5538	unknown function	orf6.8381	Sequence	Oligo report	Gene image	CandidaDB	http://www.candidagenome.org/cgi-bin/locus.pl?locus=orf19.7300
orf19.6275	1945	CA03736_01	47	-1.33334	7.19676e-08	0.00049744	CA03736_01	IPF4860	CA3699	similarity to ribosomal protein kinases (by homology)	orf6.6034	Sequence	Oligo report	Gene image	CandidaDB	http://www.candidagenome.org/cgi-bin/locus.pl?locus=orf19.6275
orf19.448	3922	CA01032_01	127	-1.32027	0	0	CA01032_01	IPF5918	CA0669	unknown function	orf6.1738	Sequence	Oligo report	Gene image	CandidaDB	http://www.candidagenome.org/cgi-bin/locus.pl?locus=orf19.448
orf19.7578	4260	CA06153_01	46	-1.3066	1.4858e-10	1.02698e-06	CA06153_01	IPF915	CA5982	unknown function	orf6.8926	Sequence	Oligo report	Gene image	CandidaDB	http://www.candidagenome.org/cgi-bin/locus.pl?locus=orf19.7578
orf19.5544	6500	CA00818_01	181	-1.29548	2.06613e-12	1.42811e-08	CA00818_01	CaSAC6.5f	CA0408	actin filament bundling protein, fimbrin, 5-prime end (by homology)	orf6.1299	Sequence	Oligo report	Gene image	CandidaDB	http://www.candidagenome.org/cgi-bin/locus.pl?locus=orf19.5544
orf19.5614	4764	CA00700_01	142	-1.29533	1.28968e-07	0.000891427	CA00700_01	NULL		NULL	orf6.1048	Sequence	Oligo report	Gene image	CandidaDB	http://www.candidagenome.org/cgi-bin/locus.pl?locus=orf19.13058
orf19.1267	2656	CA01250_01	173	-1.29355	6.1795e-13	4.27127e-09	CA01250_01	IPF10278	CA0945	DNA-J - like protein (by homology)	orf6.2159	Sequence	Oligo report	Gene image	CandidaDB	http://www.candidagenome.org/cgi-bin/locus.pl?locus=orf19.1267
orf19.4262	4760	CA00692_01	141	-1.2894	2.2311e-12	1.54214e-08	CA00692_01	CaPUF2.exon2	CA0268	RNA-binding protein, exon 2 (by homology)	orf6.1031	Sequence	Oligo report	Gene image	CandidaDB	http://www.candidagenome.org/cgi-bin/locus.pl?locus=orf19.4262
orf19.2808	3606	CA02745_01	45	-1.28601	1.84151e-06	0.0127285	CA02745_01	IPF9499	CA2621	probable transcription factor (by homology)	orf6.4585	Sequence	Oligo report	Gene image	CandidaDB	http://www.candidagenome.org/cgi-bin/locus.pl?locus=orf19.2808
orf19.5130	1841	CA01974_01	208	-1.28556	2.49132e-07	0.001722	CA01974_01	CaPDI1	CA1755	protein disulfide-isomerase precursor (by homology)	orf6.3401	Sequence	Oligo report	Gene image	CandidaDB	http://www.candidagenome.org/cgi-bin/locus.pl?locus=orf19.5130
orf19.5669	2410	CA04407_01	170	-1.24985	4.86573e-07	0.00336319	CA04407_01	IPF11301	CA4377	unknown function	orf6.6909	Sequence	Oligo report	Gene image	CandidaDB	http://www.candidagenome.org/cgi-bin/locus.pl?locus=orf19.5669
orf19.7044	4642	CA05341_01	79	-1.2494	0	0	CA05341_01	CaRIM15	CA5226	Protein kinase involved in the RIM pathway (by homology)	orf6.7970	Sequence	Oligo report	Gene image	CandidaDB	http://www.candidagenome.org/cgi-bin/locus.pl?locus=orf19.7044
orf19.7109	3816	CA05743_01	117	-1.24627	9.7941e-08	0.000676968	CA05743_01	IPF5618	CA5591	unknown function	orf6.8444	Sequence	Oligo report	Gene image	CandidaDB	http://www.candidagenome.org/cgi-bin/locus.pl?locus=orf19.7109
orf19.4579	2053	CA05256_01	187	-1.23569	4.44089e-16	3.06954e-12	CA05256_01	IPF1022	CA5142	similar to Saccharomyces cerevisiae Erv29p ER-Golgi transport vesicle protein (by homology)	orf6.7878	Sequence	Oligo report	Gene image	CandidaDB	http://www.candidagenome.org/cgi-bin/locus.pl?locus=orf19.4579
orf19.7328	1212	CA05711_01	172	-1.23378	5.1501e-11	3.55975e-07	CA05711_01	IPF1980	CA5564	unknown function	orf6.8409	Sequence	Oligo report	Gene image	CandidaDB	http://www.candidagenome.org/cgi-bin/locus.pl?locus=orf19.7328
orf19.11074	1778	CA01188_01	130	-1.2267	8.65578e-09	5.98288e-05	CA01188_01	IPF13100	CA0872	unknown function	orf6.2050	Sequence	Oligo report	Gene image	CandidaDB	http://www.candidagenome.org/cgi-bin/locus.pl?locus=orf19.11074
orf19.6217	5345	CA02699_01	165	-1.22209	5.55241e-06	0.0383782	CA02699_01	CaSEC31	CA2575	Component of the COPII coat of ER-golgi vesicles (by homology).	orf6.4529	Sequence	Oligo report	Gene image	CandidaDB	http://www.candidagenome.org/cgi-bin/locus.pl?locus=orf19.6217
orf19.11823	1867	CA02351_01	103	-1.22126	1.9236e-07	0.00132959	CA02351_01	CaSEC16.5eoc	CA2192	Multidomain vesicle coat protein, 5-prime end (by homology)	orf6.3990	Sequence	Oligo report	Gene image	CandidaDB	http://www.candidagenome.org/cgi-bin/locus.pl?locus=orf19.11823
orf19.1317	6625	CA02930_01	123	-1.21848	1.49493e-07	0.00103329	CA02930_01	IPF14554	CA2823	similar to Saccharomyces cerevisiae Osh3p oxysterol-binding protein (by homology)	orf6.4879	Sequence	Oligo report	Gene image	CandidaDB	http://www.candidagenome.org/cgi-bin/locus.pl?locus=orf19.1317
orf19.7823	4402	CA01684_01	74	-1.21678	5.23155e-11	3.61605e-07	CA01684_01	IPF14730.5eoc	CA1449	unknown function, 5-prime end	orf6.2966	Sequence	Oligo report	Gene image	CandidaDB	http://www.candidagenome.org/cgi-bin/locus.pl?locus=orf19.7823
orf19.6598	4548	CA03868_01	124	-1.20913	2.47713e-12	1.71219e-08	CA03868_01	CaLAS17	CA3838	actin assembly factor (by homology)	orf6.6210	Sequence	Oligo report	Gene image	CandidaDB	http://www.candidagenome.org/cgi-bin/locus.pl?locus=orf19.6598
orf19.7996	1779	CA01190_01	169	-1.20614	4.43184e-06	0.0306329	CA01190_01	CaVMA6	CA0876	H+-ATPase V0 domain 36 KD subunit,vacuolar (by homology)	orf6.2055	Sequence	Oligo report	Gene image	CandidaDB	http://www.candidagenome.org/cgi-bin/locus.pl?locus=orf19.7996
orf19.2832	1881	CA02672_01	58	-1.20394	1.97539e-07	0.00136539	CA02672_01	IPF14911	CA2547	unknown function	orf6.4493	Sequence	Oligo report	Gene image	CandidaDB	http://www.candidagenome.org/cgi-bin/locus.pl?locus=orf19.2832
orf19.3997	399	CA10145_01	206	-1.19832	2.61934e-10	1.81049e-06	CA10145_01	CaADH1	CA4765	alcohol dehydrogenase (by homology)		Sequence	Oligo report		CandidaDB	http://www.candidagenome.org/cgi-bin/locus.pl?locus=orf19.3997
orf19.5809	1992	CA04180_01	54	-1.19194	0	0	CA04180_01	IPF20164.3eoc	CA3155	putative kynurenine aminotransferase, 3-prime end (by homology)	orf6.6643	Sequence	Oligo report	Gene image	CandidaDB	http://www.candidagenome.org/cgi-bin/locus.pl?locus=orf19.5809
orf19.7537	365	CA06039_01	81	-1.17923	0	0	CA06039_01	IPF345	CA5870	FH1/FH2 involved in cytokinesis and polarity (by homology)	orf6.8789	Sequence	Oligo report	Gene image	CandidaDB	http://www.candidagenome.org/cgi-bin/locus.pl?locus=orf19.7537
orf19.6082	3695	CA03902_01	166	-1.1782	3.21321e-06	0.0222097	CA03902_01	IPF4606	CA3866	unknown Function	orf6.6259	Sequence	Oligo report	Gene image	CandidaDB	http://www.candidagenome.org/cgi-bin/locus.pl?locus=orf19.6082
orf19.1220	3968	CA01760_01	128	-1.1777	4.25947e-10	2.94415e-06	CA01760_01	CaRVS167	CA1531	(putative) cytoskeletal protein (by homology)	orf6.3078	Sequence	Oligo report	Gene image	CandidaDB	http://www.candidagenome.org/cgi-bin/locus.pl?locus=orf19.1220
orf19.6000	4716	CA10170_01	191	-1.16797	3.65448e-07	0.00252598	CA10170_01	NULL		CDR1		Sequence	Oligo report		CandidaDB	http://www.candidagenome.org/cgi-bin/locus.pl?locus=orf19.6000
orf19.2680	3310	CA00615_01	139	-1.16567	1.60948e-06	0.0111247	CA00615_01	NULL		NULL	orf6.740	Sequence	Oligo report	Gene image	CandidaDB	http://www.candidagenome.org/cgi-bin/locus.pl?locus=orf19.2680
orf19.2296	1759	CA00849_01	108	-1.1564	0	0	CA00849_01	IPF14282	CA0446	Similar to mucin proteins (by homology)	orf6.1373	Sequence	Oligo report		CandidaDB	http://www.candidagenome.org/cgi-bin/locus.pl?locus=orf19.2296
orf19.4346	2676	CA01596_01	180	-1.14728	1.19704e-12	8.27396e-09	CA01596_01	NULL		NULL	orf6.2802	Sequence	Oligo report	Gene image	CandidaDB	http://www.candidagenome.org/cgi-bin/locus.pl?locus=orf19.4346
orf19.3737	2340	CA03314_01	77	-1.14536	2.86549e-12	1.98062e-08	CA03314_01	IPF4721	CA3251	unknown Function	orf6.5467	Sequence	Oligo report	Gene image	CandidaDB	http://www.candidagenome.org/cgi-bin/locus.pl?locus=orf19.3737
orf19.6403	2049	CA05236_01	164	-1.13356	6.91669e-13	4.78082e-09	CA05236_01	CaSLS1	CA5126	Endoplasmic translocation machinery by homology	orf6.7851	Sequence	Oligo report	Gene image	CandidaDB	http://www.candidagenome.org/cgi-bin/locus.pl?locus=orf19.6403
orf19.6176	4080	CA03267_01	207	-1.12349	4.57488e-06	0.0316215	CA03267_01	CaSEC61	CA3197	ER protein-translocation complex subunit	orf6.5397	Sequence	Oligo report	Gene image	CandidaDB	http://www.candidagenome.org/cgi-bin/locus.pl?locus=orf19.6176
orf19.2888	1967	CA03810_01	131	-1.11858	2.48784e-07	0.00171959	CA03810_01	IPF10431	CA3778	unknown function	orf6.6134	Sequence	Oligo report	Gene image	CandidaDB	http://www.candidagenome.org/cgi-bin/locus.pl?locus=orf19.2888
orf19.851	3489	CA00938_01	41	-1.11419	1.678e-09	1.15983e-05	CA00938_01	IPF14030	CA0550	unknown function	orf6.1543	Sequence	Oligo report	Gene image	CandidaDB	http://www.candidagenome.org/cgi-bin/locus.pl?locus=orf19.851
orf19.9738	1844	CA01992_01	94	-1.10716	1.98178e-07	0.00136981	CA01992_01	CaGDH2	CA1775	NAD-specific glutamate dehydrogenase (NAD) (by homology)	orf6.3428	Sequence	Oligo report	Gene image	CandidaDB	http://www.candidagenome.org/cgi-bin/locus.pl?locus=orf19.9738
orf19.6327	5805	CA03355_01	205	-1.10574	3.50393e-06	0.0242192	CA03355_01	IPF5726	CA3293	unknown function	orf6.5520	Sequence	Oligo report	Gene image	CandidaDB	http://www.candidagenome.org/cgi-bin/locus.pl?locus=orf19.6327
orf19.4950	3946	CA01394_01	99	-1.10201	1.90958e-14	1.3199e-10	CA01394_01	CaAKR1	CA1102	ankyrin repeat-containing protein by homology	orf6.2433	Sequence	Oligo report	Gene image	CandidaDB	http://www.candidagenome.org/cgi-bin/locus.pl?locus=orf19.4950
orf19.3133	4096	CA03604_01	192	-1.09485	2.79797e-07	0.00193396	CA03604_01	CaGUT2	CA3566	Glycerol-3-phosphate dehydrogenase, mitochondrial (by homology)	orf6.5870	Sequence	Oligo report	Gene image	CandidaDB	http://www.candidagenome.org/cgi-bin/locus.pl?locus=orf19.3133
orf19.5037	6572	CA01911_01	34	-1.08867	1.25776e-07	0.000869367	CA01911_01	IPF17054	CA1693	unknown function	orf6.3314	Sequence	Oligo report	Gene image	CandidaDB	http://www.candidagenome.org/cgi-bin/locus.pl?locus=orf19.5037
orf19.5546	6499	CA00816_01	182	-1.08014	9.71572e-08	0.00067155	CA00816_01	CaSAC6.3f	CA0407	Actin filament bundling protein, fimbrin, 3-prime end (by homology)	orf6.1297	Sequence	Oligo report	Gene image	CandidaDB	http://www.candidagenome.org/cgi-bin/locus.pl?locus=orf19.5546
orf19.2863	5705	CA01881_01	92	-1.07558	2.00089e-08	0.000138302	CA01881_01	NULL		NULL	orf6.3267	Sequence	Oligo report	Gene image	CandidaDB	http://www.candidagenome.org/cgi-bin/locus.pl?locus=orf19.2863
orf19.3219	6554	CA01843_01	171	-1.07339	1.70699e-08	0.000117987	CA01843_01	IPF14538	CA1616	unknown function	orf6.3200	Sequence	Oligo report	Gene image	CandidaDB	http://www.candidagenome.org/cgi-bin/locus.pl?locus=orf19.3219
orf19.4662	4485	CA02821_01	80	-1.06448	0	0	CA02821_01	IPF4828	CA2709	by homology to S. cerevisiae YEAST TRANSCRIPTION FACTOR RLM1	orf6.4713	Sequence	Oligo report	Gene image	CandidaDB	http://www.candidagenome.org/cgi-bin/locus.pl?locus=orf19.4662
orf19.6474	51	CA01278_01	138	-1.0602	8.70056e-07	0.00601383	CA01278_01	IPF12662	CA0973	unknown function	orf6.2218	Sequence	Oligo report	Gene image	CandidaDB	http://www.candidagenome.org/cgi-bin/locus.pl?locus=orf19.6474
orf19.4679	2337	CA03308_01	106	-1.05537	1.12543e-08	7.77897e-05	CA03308_01	CaAGP2	CA3244	amino-acid permease (by homology)	orf6.5457	Sequence	Oligo report	Gene image	CandidaDB	http://www.candidagenome.org/cgi-bin/locus.pl?locus=orf19.4679
orf19.7788	5623	CA00760_01	66	-1.04476	5.65515e-06	0.0390884	CA00760_01	CaYAK1.5f	CA0354	serine/threonine protein kinase, 5-prime end (by homology)	orf6.1180	Sequence	Oligo report	Gene image	CandidaDB	http://www.candidagenome.org/cgi-bin/locus.pl?locus=orf19.7788
orf19.20	5679	CA01509_01	162	-1.04467	2.13452e-12	1.47538e-08	CA01509_01	IPF3870	CA1247	similar to Saccharomyces cerevisiae Rts1p potential regulatory subunit of protein phosphatase 2A	orf6.2653	Sequence	Oligo report	Gene image	CandidaDB	http://www.candidagenome.org/cgi-bin/locus.pl?locus=orf19.20
orf19.6091	1752	CA00342_01	107	-1.0358	0	0	CA00342_01	CaRIM8	CA3861	regulator of PH response		Sequence	Oligo report		CandidaDB	http://www.candidagenome.org/cgi-bin/locus.pl?locus=orf19.6091
orf19.11750	4836	CA01780_01	140	-1.0354	3.12847e-09	2.1624e-05	CA01780_01	CaPUT1	CA1552	proline oxidase (by homology)	orf6.3112	Sequence	Oligo report	Gene image	CandidaDB	http://www.candidagenome.org/cgi-bin/locus.pl?locus=orf19.11750
orf19.9755	116	CA02085_01	75	-1.03169	4.6514e-07	0.00321505	CA02085_01	IPF19934	CA1882	unknown function	orf6.3574	Sequence	Oligo report	Gene image	CandidaDB	http://www.candidagenome.org/cgi-bin/locus.pl?locus=orf19.9755
orf19.2028	3217	CA00577_01	178	-1.03002	1.01991e-09	7.04961e-06	CA00577_01	CaMXR1	CA0123	methionine sulfoxide reductase	orf6.592	Sequence	Oligo report	Gene image	CandidaDB	http://www.candidagenome.org/cgi-bin/locus.pl?locus=orf19.2028
orf19.4867	2213	CA01467_01	93	-1.02708	0	0	CA01467_01	IPF10223	CA1200	putative serine/threonine kinase	orf6.2582	Sequence	Oligo report	Gene image	CandidaDB	http://www.candidagenome.org/cgi-bin/locus.pl?locus=orf19.4867
orf19.4991	3792	CA05378_01	104	-1.02039	6.57888e-10	4.54732e-06	CA05378_01	NULL		NULL	orf6.8017	Sequence	Oligo report	Gene image	CandidaDB	http://www.candidagenome.org/cgi-bin/locus.pl?locus=orf19.4991
orf19.442	2399	CA04084_01	61	-1.0183	1.21391e-06	0.00839053	CA04084_01	NULL		NULL	orf6.6511	Sequence	Oligo report	Gene image	CandidaDB	http://www.candidagenome.org/cgi-bin/locus.pl?locus=orf19.442
orf19.6141	195	CA03467_01	5	1.006	1.93367e-08	0.000133656	CA03467_01	IPF9240	CA3414	probable permease	orf6.5673	Sequence	Oligo report	Gene image	CandidaDB	http://www.candidagenome.org/cgi-bin/locus.pl?locus=orf19.6141
orf19.8537	2176	CA00790_01	1	1.05171	1.84126e-06	0.0127268	CA00790_01	NULL		NULL	orf6.1244	Sequence	Oligo report	Gene image	CandidaDB	http://www.candidagenome.org/cgi-bin/locus.pl?locus=orf19.8537
orf19.3553	157	CA02784_01	149	1.05319	3.53585e-07	0.00244398	CA02784_01	IPF17139	CA2662	unknown function	orf6.4648	Sequence	Oligo report	Gene image	CandidaDB	http://www.candidagenome.org/cgi-bin/locus.pl?locus=orf19.3553
orf19.4093	5009	CA04351_01	154	1.06642	1.62981e-13	1.12652e-09	CA04351_01	IPF2093	CA4326	nuclear protein of unknown function (by homology)	orf6.6843	Sequence	Oligo report	Gene image	CandidaDB	http://www.candidagenome.org/cgi-bin/locus.pl?locus=orf19.4093
orf19.5106	13	CA10236_01	27	1.06987	4.88305e-08	0.000337516	CA10236_01	NULL		beta transducin or WD domain protein		Sequence	Oligo report		CandidaDB	http://www.candidagenome.org/cgi-bin/locus.pl?locus=orf19.5106
orf19.7593	805	CA06166_01	9	1.08053	0	0	CA06166_01	CaASP1	CA5993	L-asparaginase (by homology)	orf6.8941	Sequence	Oligo report	Gene image	CandidaDB	http://www.candidagenome.org/cgi-bin/locus.pl?locus=orf19.7593
orf19.3040	2462	CA05166_01	18	1.08655	0	0	CA05166_01	IPF3589	CA5067	putative alcohol acyl transferase (by homology)	orf6.7777	Sequence	Oligo report	Gene image	CandidaDB	http://www.candidagenome.org/cgi-bin/locus.pl?locus=orf19.3040
orf19.2942	6187	CA02361_01	152	1.08841	2.68896e-13	1.85861e-09	CA02361_01	CaDIP51.3f	CA2203	dicarboxylic amino acid permease, 3-prime end (by homology)	orf6.4006	Sequence	Oligo report	Gene image	CandidaDB	http://www.candidagenome.org/cgi-bin/locus.pl?locus=orf19.2942
orf19.5759	228	CA03858_01	147	1.08959	8.48837e-11	5.86716e-07	CA03858_01	CaSNQ2	CA3828	multidrug resistance protein (by homology)	orf6.6199	Sequence	Oligo report	Gene image	CandidaDB	http://www.candidagenome.org/cgi-bin/locus.pl?locus=orf19.5759
orf19.172	77	CA01652_01	145	1.11465	0	0	CA01652_01	IPF16126	CA1417	similar to Saccharomyces cerevisiae Rpc19p DNA-directed RNA polymerase I,III 16 KD subunit (by homology)	orf6.2908	Sequence	Oligo report	Gene image	CandidaDB	http://www.candidagenome.org/cgi-bin/locus.pl?locus=orf19.172
orf19.6989	3313	CA05128_01	13	1.12419	7.71891e-07	0.00533531	CA05128_01	IPF4531	CA5035	unknown function	orf6.7735	Sequence	Oligo report	Gene image	CandidaDB	http://www.candidagenome.org/cgi-bin/locus.pl?locus=orf19.6989
orf19.813	4572	CA04236_01	151	1.12887	1.89271e-12	1.30824e-08	CA04236_01	NULL		NULL	orf6.6704	Sequence	Oligo report	Gene image	CandidaDB	http://www.candidagenome.org/cgi-bin/locus.pl?locus=orf19.813
orf19.6007	6847	CA06248_01	155	1.14714	4.34252e-09	3.00155e-05	CA06248_01	IPF8302	CA6061	unknown function	orf6.9030	Sequence	Oligo report	Gene image	CandidaDB	http://www.candidagenome.org/cgi-bin/locus.pl?locus=orf19.6007
orf19.3874	1495	CA03587_01	10	1.16795	1.51468e-09	1.04695e-05	CA03587_01	IPF13228	CA3550	unknown function	orf6.5845	Sequence	Oligo report	Gene image	CandidaDB	http://www.candidagenome.org/cgi-bin/locus.pl?locus=orf19.3874
orf19.5832	6287	CA03820_01	157	1.19357	6.66134e-16	4.60432e-12	CA03820_01	CaHPT1	CA3787	hypoxanthine guanine phosphoribosy transferase(by homology)	orf6.6146	Sequence	Oligo report	Gene image	CandidaDB	http://www.candidagenome.org/cgi-bin/locus.pl?locus=orf19.5832
orf19.5753	1765	CA00870_01	28	1.19938	0	0	CA00870_01	CaSTL1	CA0472	sugar transporter (by homology)	orf6.1416	Sequence	Oligo report	Gene image	CandidaDB	http://www.candidagenome.org/cgi-bin/locus.pl?locus=orf19.5753
orf19.7769	5671	CA01481_01	19	1.24545	3.79564e-07	0.00262355	CA01481_01	CaCDC20	CA1218	anaphase promoting complex subunit (by homology)	orf6.2609	Sequence	Oligo report	Gene image	CandidaDB	http://www.candidagenome.org/cgi-bin/locus.pl?locus=orf19.7769
orf19.3478	6644	CA03001_01	144	1.24672	0	0	CA03001_01	CaNIP7	CA2900	required for efficient 60S ribosome subunit biogenesis (by homology)	orf6.4981	Sequence	Oligo report	Gene image	CandidaDB	http://www.candidagenome.org/cgi-bin/locus.pl?locus=orf19.3478
orf19.6124	1915	CA03076_01	17	1.25556	6.91935e-12	4.78266e-08	CA03076_01	IPF9108	CA2996	similar to Saccharomyces cerevisiae Ace2p transcription factor (by homology)	orf6.5105	Sequence	Oligo report	Gene image	CandidaDB	http://www.candidagenome.org/cgi-bin/locus.pl?locus=orf19.6124
orf19.5208	2711	CA02010_01	22	1.26048	0	0	CA02010_01	IPF18608.3f	CA1794	unknown function, 3-prime end	orf6.3451	Sequence	Oligo report	Gene image	CandidaDB	http://www.candidagenome.org/cgi-bin/locus.pl?locus=orf19.5208
orf19.4381	4977	CA03955_01	26	1.26066	0	0	CA03955_01	CaVTC3	CA3918	putative polyphosphate synthetase (by homology)	orf6.6326	Sequence	Oligo report	Gene image	CandidaDB	http://www.candidagenome.org/cgi-bin/locus.pl?locus=orf19.4381
orf19.3962	34	CA00941_01	148	1.26679	0	0	CA00941_01	CaHAS1	CA0554	ATP-DEPENDENT RNA HELICASE (by homology)	orf6.1551	Sequence	Oligo report	Gene image	CandidaDB	http://www.candidagenome.org/cgi-bin/locus.pl?locus=orf19.3962
orf19.2185	2705	CA01986_01	150	1.27536	4.00898e-09	2.77101e-05	CA01986_01	IPF12457	CA1770	unknown function	orf6.3421	Sequence	Oligo report	Gene image	CandidaDB	http://www.candidagenome.org/cgi-bin/locus.pl?locus=orf19.2185
orf19.655	6197	CA00535_01	153	1.28336	6.63443e-06	0.0458572	CA00535_01	CaPHO84	CA0083	high-affinity inorganic phosphate/H+ symporter by homology	orf6.447	Sequence	Oligo report	Gene image	CandidaDB	http://www.candidagenome.org/cgi-bin/locus.pl?locus=orf19.655
orf19.9534	3953	CA01420_01	16	1.29841	2.65218e-10	1.83319e-06	CA01420_01	CaIFN3	CA1138	glycerophosphoinositol transporter (by homology)	orf6.2482	Sequence	Oligo report	Gene image	CandidaDB	http://www.candidagenome.org/cgi-bin/locus.pl?locus=orf19.9534
orf19.5360	2948	CA05659_01	146	1.34564	2.9754e-14	2.0566e-10	CA05659_01	CaRPC11	CA5513	RNA polymerase III C11 subunit (by homology)	orf6.8349	Sequence	Oligo report	Gene image	CandidaDB	http://www.candidagenome.org/cgi-bin/locus.pl?locus=orf19.5360
orf19.6578	1163	CA04972_01	12	1.34674	3.02174e-11	2.08863e-07	CA04972_01	IPF1634	CA4886	unknown function	orf6.7566	Sequence	Oligo report	Gene image	CandidaDB	http://www.candidagenome.org/cgi-bin/locus.pl?locus=orf19.6578
orf19.6119	2777	CA03072_01	11	1.43616	3.53995e-08	0.000244681	CA03072_01	IPF9116	CA2994	unknown function	orf6.5100	Sequence	Oligo report	Gene image	CandidaDB	http://www.candidagenome.org/cgi-bin/locus.pl?locus=orf19.6119
orf19.3629	6547	CA01539_01	20	1.44706	2.04976e-10	1.41679e-06	CA01539_01	IPF10835	CA1278	unknown function	orf6.2710	Sequence	Oligo report	Gene image	CandidaDB	http://www.candidagenome.org/cgi-bin/locus.pl?locus=orf19.3629
orf19.9097	1838	CA01968_01	7	1.45899	5.70733e-07	0.00394491	CA01968_01	IPF8257	CA1748	unknown function	orf6.3391	Sequence	Oligo report	Gene image	CandidaDB	http://www.candidagenome.org/cgi-bin/locus.pl?locus=orf19.9097
orf19.9988	83	CA00496_01	21	1.46136	0	0	CA00496_01	IPF14850	CA0046	Hypothetical protein	orf6.294	Sequence	Oligo report	Gene image	CandidaDB	http://www.candidagenome.org/cgi-bin/locus.pl?locus=orf19.9988
orf19.5487	4874	CA02476_01	8	1.46219	0	0	CA02476_01	CaCDC46	CA2324	cell division control protein (by homology)	orf6.4181	Sequence	Oligo report	Gene image	CandidaDB	http://www.candidagenome.org/cgi-bin/locus.pl?locus=orf19.5487
orf19.3618	3114	CA01896_01	196	1.50462	5.22369e-10	3.61062e-06	CA01896_01	IPF5185	CA1678	putative cell wall protein (by homology)	orf6.3288	Sequence	Oligo report	Gene image	CandidaDB	http://www.candidagenome.org/cgi-bin/locus.pl?locus=orf19.3618
orf19.3895	6456	CA10176_01	197	1.6899	2.32503e-12	1.60706e-08	CA10176_01	CaCHT2	CA1051	chitinase 2 precursor		Sequence	Oligo report		CandidaDB	http://www.candidagenome.org/cgi-bin/locus.pl?locus=orf19.3895
orf19.5267	735	CA05073_01	156	1.69142	7.08577e-10	4.89768e-06	CA05073_01	IPF2053	CA4983	unknown function	orf6.7675	Sequence	Oligo report	Gene image	CandidaDB	http://www.candidagenome.org/cgi-bin/locus.pl?locus=orf19.5267
orf19.4456	716	CA04724_01	158	1.70356	2.26485e-14	1.56547e-10	CA04724_01	CaGAP5	CA4667	General amino acid permease (by homology)	orf6.7269	Sequence	Oligo report	Gene image	CandidaDB	http://www.candidagenome.org/cgi-bin/locus.pl?locus=orf19.4456
orf19.12211	2734	CA02368_01	2	1.80231	1.97765e-08	0.000136695	CA02368_01	IPF13921	CA2211	Unknown function	orf6.4019	Sequence	Oligo report	Gene image	CandidaDB	http://www.candidagenome.org/cgi-bin/locus.pl?locus=orf19.12211
orf19.2496	1085	CA03844_01	23	1.94189	4.61115e-06	0.0318722	CA03844_01	CaFRP1	CA3813	member of the FRP family of proteins related to Yarrowia lipolytica glyoxylate pathway regulator Gpr1p and Saccharomyces cerevisiae Fun34p	orf6.6177	Sequence	Oligo report	Gene image	CandidaDB	http://www.candidagenome.org/cgi-bin/locus.pl?locus=orf19.2496
orf19.5664	5864	CA04402_01	4	2.06535	4.90248e-06	0.033886	CA04402_01	IPF5287	CA4373	signal transduction protein (by homology)	orf6.6904	Sequence	Oligo report	Gene image	CandidaDB	http://www.candidagenome.org/cgi-bin/locus.pl?locus=orf19.5664
orf19.6008	2532	CA06247_01	6	2.0867	0	0	CA06247_01	IPF8301	CA6060	unknown function	orf6.9029	Sequence	Oligo report	Gene image	CandidaDB	http://www.candidagenome.org/cgi-bin/locus.pl?locus=orf19.6008
orf19.4211	1900	CA03015_01	29	2.17189	0	0	CA03015_01	CaFET33	CA2924	cell surface ferroxidase (by homology)	orf6.5010	Sequence	Oligo report	Gene image	CandidaDB	http://www.candidagenome.org/cgi-bin/locus.pl?locus=orf19.4211
orf19.1507	3046	CA00823_01	3	2.17718	1.11959e-11	7.73863e-08	CA00823_01	IPF17676	CA0411	similar to Saccharomyces cerevisiae Cst13p involved in chromosome stability (by homology)	orf6.1307	Sequence	Oligo report	Gene image	CandidaDB	http://www.candidagenome.org/cgi-bin/locus.pl?locus=orf19.1507
orf19.9987	5633	CA00791_01	14	2.19443	7.75957e-12	5.36341e-08	CA00791_01	IPF14109	CA0380	unknown function	orf6.1247	Sequence	Oligo report	Gene image	CandidaDB	http://www.candidagenome.org/cgi-bin/locus.pl?locus=orf19.9987
orf19.3893	3524	CA01345_01	15	2.27767	1.13243e-14	7.82734e-11	CA01345_01	CaSCW11.3eoc	CA1053	glucanase gene family member, 3-prime end (by homology)	orf6.2346	Sequence	Oligo report	Gene image	CandidaDB	http://www.candidagenome.org/cgi-bin/locus.pl?locus=orf19.3893
orf19.4910	2259	CA02198_01	25	2.73971	0	0	CA02198_01	IPF9616	CA2024	unknown function	orf6.3757	Sequence	Oligo report	Gene image	CandidaDB	http://www.candidagenome.org/cgi-bin/locus.pl?locus=orf19.4910
orf19.7586	3000	CA10175_01	24	3.82091	0	0	CA10175_01	CaCHT3	CA5987	chitinase 3 precursor		Sequence	Oligo report		CandidaDB	http://www.candidagenome.org/cgi-bin/locus.pl?locus=orf19.7586

## Sheet: 4.  All Data
ID	Name	wt + (32)	wt - (32)	Flags (32)	wt + (33)	cas3d + (33)	Flags (33)	wt + (34)	cas5d + (34)	Flags (34)	wt + (35)	rlm1d + (35)	Flags (35)	rlm1d + (36)	wt + (36)	Flags (36)	wt + (41)	wt - (41)	Flags (41)	wt + (42)	cas3d + (42)	Flags (42)	wt + (43)	cas5d + (43)	Flags (43)	wt + (44)	rlm1d + (44)	Flags (44)	wt - (45)	wt + (45)	Flags (45)	cas3d + (46)	wt + (46)	Flags (46)	cas5d + (48)	wt + (48)	Flags (48)	rlm1d + (49)	wt + (49)	Flags (49)
CA10206_01	NADH dehydrogenase subunit 4	6755	6429	0	8577	4068	0	5161	2166	0	6122	3653	0	0	15850	0	5494	14457	0	8065	12242	0	7393	16239	0	7441	26501	0	5269	18292	0	3369	18088	0	10089	12078	0	7633	15978	0
CA10196_01	NADH dehydrogenase subunit 6	15446	27431	0	28118	22373	0	12207	4940	0	14043	8517	0	0	33246	0	10726	40313	0	17374	32445	0	17200	31254	0	18357	46510	0	24771	31092	0	9806	26795	0	19799	19801	0	13286	23451	0
CA10198_01	cytochrome oxidase subunit 3	27915	37196	0	39956	31507	0	22907	13805	0	21138	22343	0	0	53337	0	19134	39367	0	29221	27937	0	29341	35584	0	27372	48888	0	31068	41709	0	8632	44028	0	30130	32895	0	28781	45751	0
CA10200_01	ATPase subunit 6	9803	6337	0	13491	6548	0	5312	1549	0	7601	2576	0	0	19170	0	4174	9024	0	7366	17375	0	7744	15803	0	7127	25262	0	4874	23796	0	6219	21963	0	12342	15356	0	9638	22608	0
CA10202_01	NADH dehydrogenase subunit 2	5402	3706	0	8133	2362	0	1765	851	0	3353	1491	0	0	7384	0	2050	5595	0	3404	4946	0	3989	12121	0	3194	14138	0	2531	12641	0	1405	10680	0	7763	7941	0	3925	10678	0
CA10274_01	HIS4	506	730	0	660	1040	0	209	168	0	344	453	0	0	792	0	266	725	0	494	933	0	597	947	0	527	1056	0	466	1080	0	222	730	0	512	531	0	345	783	0
CA10269_01	conserved hypothetical protein	248	217	0	272	596	0	124	126	0	173	287	0	0	452	0	151	231	0	224	596	0	241	417	0	263	498	0	130	605	0	116	343	0	222	295	0	175	418	0
CA10272_01	serine /threonine protein kinase	575	758	0	671	602	0	388	329	0	452	598	0	0	966	0	297	491	0	498	421	0	508	706	0	638	986	0	441	1159	0	92	654	0	426	579	0	442	794	0
CA10257_01	dead box helicase	610	1427	0	991	596	0	414	295	0	462	519	0	0	1482	0	339	1301	0	574	352	0	600	1069	0	599	1403	0	908	1186	0	79	828	0	641	632	0	561	1009	0
CA10212_01	conserved hypothetical protein	3434	8820	0	4725	3383	0	1740	1082	0	1964	2278	0	0	5066	0	1375	4031	0	2905	1822	0	2792	3474	0	3078	5131	0	3911	4288	0	337	2484	0	1778	1907	0	1617	2870	0
CA10213_01	hypothetical protein	177	261	0	240	487	0	95	126	0	122	232	0	0	409	0	96	197	0	157	261	0	159	244	0	170	346	0	142	364	0	51	218	0	117	168	0	94	239	0
CA10251_01	questionable orf	1	17	-50	22	211	-50	-4	52	-50	4	104	0	0	103	0	3	53	-50	-10	18	-50	4	39	-50	-1	34	-50	9	42	-50	4	64	-50	1	40	-50	-1	76	-50
CA10236_01	beta transducin or WD domain protein	690	1884	0	949	872	0	380	475	0	379	585	0	0	1271	0	390	1325	0	680	602	0	670	1214	0	787	1448	0	875	1139	0	143	769	0	808	624	0	473	925	0
CA00345_01	C.albicans ARG5,6 gene.	292	638	0	401	2617	0	173	303	0	225	389	0	0	653	0	239	530	0	299	913	0	299	598	0	386	631	0	378	640	0	211	447	0	420	396	0	394	645	0
CA00347_01	Candida albicans ERG16 gene for cytochrome p-450 L1A1.	2176	4166	0	2573	2922	0	909	662	0	943	1084	0	0	2465	0	926	1806	0	1669	2023	0	2509	2214	0	1728	3041	0	2211	3141	0	421	1354	0	1071	1279	0	949	1552	0
CA00350_01	Candida albicans CDC6 gene.	50	367	0	66	278	0	18	101	0	27	112	0	0	191	0	16	217	0	23	49	-50	32	154	0	26	115	0	193	147	0	7	98	-50	52	103	-50	22	122	0
CA00354_01	C.albicans DNA for yeast MDL1 homologue.	437	498	0	445	745	0	221	206	0	194	337	0	0	670	0	178	244	0	354	302	0	391	362	0	417	628	0	251	652	0	63	435	0	195	355	0	225	428	0
CA00356_01	C.albicans DNA for MNT2 gene.	1304	1172	0	1115	802	0	489	244	0	471	511	0	0	1457	0	346	493	0	787	684	0	863	805	0	866	1822	0	645	2065	0	144	983	0	411	808	0	513	983	0
CA00251_01	Candida albicans ribosomal protein L29 (RPL29) mRNA, partial cds.	34929	46649	0	34570	15865	0	15640	7438	0	16763	17696	0	0	38334	0	14783	24034	0	28864	10424	0	29279	20862	0	32810	40568	0	28704	40474	0	2390	24114	0	16752	21146	0	21947	29430	0
CA00366_01	Candida albicans glyceraldehyde-3-phosphate dehydrogenase (CaGAP)	23438	32719	0	27201	18103	0	13138	8372	0	12258	15105	0	0	30524	0	16465	28812	0	27638	18089	0	29734	27567	0	31629	32762	0	32313	36545	0	2566	21338	0	15835	18924	0	20773	25949	0
CA00435_01	Candida albicans transcription factor Cap1 (CAP1) gene, complete	672	748	0	733	529	0	316	224	0	294	407	0	0	681	0	346	490	0	520	635	0	568	683	0	638	1239	0	300	1225	0	85	664	0	277	490	0	307	673	0
CA10137_01	chitin synthase III	3539	3307	0	2715	3026	0	1426	904	0	1051	1307	0	0	2887	0	1652	1429	0	2743	1256	0	3068	2301	0	3403	3296	0	1461	4019	0	232	1749	0	1192	1730	0	1297	2399	0
CA10138_01	CFL1	30	114	0	43	296	0	6	75	0	5	74	-50	0	151	0	13	113	0	3	108	-50	33	64	-50	17	87	-50	62	76	0	22	64	-50	17	71	-50	5	95	-50
CA00368_01	Candida albicans gene for CaRho1, complete cds.	7160	11548	0	8482	5199	0	3326	1704	0	2345	2557	0	0	8884	0	5044	7187	0	8277	4169	0	7648	5669	0	8431	9484	0	5919	9254	0	611	4962	0	3189	4307	0	5424	7076	0
CA00911_01	CA00911_01	-10	18	-50	29	235	0	-1	38	-50	5	97	0	0	132	0	3	58	-50	35	103	0	67	141	0	7	69	0	13	59	-50	5	61	-50	-3	63	-50	2	64	-50
CA00913_01	CA00913_01	44	46	0	196	487	-50	72	51	-50	47	126	0	0	276	0	101	105	0	198	156	0	142	162	0	93	152	0	73	243	0	35	115	-50	85	90	-50	53	156	0
CA00915_01	CA00915_01	246	326	0	396	507	0	127	55	-50	201	298	0	0	578	0	165	308	0	230	253	0	232	284	0	203	465	0	152	403	0	55	339	0	127	179	0	107	293	0
CA00917_01	CA00917_01	5	14	0	31	246	0	-21	31	-50	7	95	0	0	147	0	7	52	-50	3	70	0	14	54	-50	6	58	-50	6	58	-50	13	68	-50	-4	36	-50	2	91	-50
CA00919_01	CA00919_01	248	346	0	308	420	0	114	112	0	189	265	0	0	490	0	154	290	0	209	203	0	234	352	0	217	460	0	192	436	0	58	360	0	181	223	0	134	322	0
CA00921_01	CA00921_01	353	472	0	588	656	0	190	200	0	313	476	0	0	620	0	255	423	0	368	456	0	368	498	0	408	724	0	280	721	0	113	543	0	234	368	0	250	580	0
CA00935_01	CA00935_01	1365	2031	0	1635	594	0	587	408	0	954	976	0	0	1631	0	1071	1987	0	1147	615	0	1247	1669	0	1363	2455	0	1258	2376	0	105	1629	0	992	1113	0	639	1356	0
CA00937_01	CA00937_01	74	174	0	85	379	0	35	93	0	54	154	0	0	228	0	45	178	0	53	100	0	66	111	0	85	168	0	90	187	0	26	147	0	60	119	0	55	165	0
CA00939_01	CA00939_01	0	21	-50	17	183	0	-8	42	-50	0	65	0	0	89	-50	-1	56	-50	-13	16	-50	6	30	-50	-6	30	-50	5	44	-50	8	59	-50	-3	37	-50	-5	63	-50
CA00941_01	CA00941_01	940	3212	0	1375	1401	0	779	697	0	724	1076	0	0	2124	0	807	2711	0	1105	717	0	946	1570	0	1217	2038	0	1808	1840	0	158	1127	0	1012	881	0	982	1625	0
CA00943_01	CA00943_01	643	1222	0	896	1178	0	383	301	0	412	505	0	0	1187	0	347	974	0	516	970	0	501	805	0	578	1127	0	702	1042	0	188	654	0	378	396	0	315	696	0
CA00945_01	CA00945_01	735	261	0	524	282	0	142	93	0	96	198	0	0	381	0	667	238	0	650	132	0	405	186	0	217	297	0	85	598	0	29	344	0	81	200	0	127	284	0
CA00958_01	CA00958_01	4	29	0	15	197	0	-8	33	-50	0	75	-50	0	108	0	0	43	-50	-17	8	-50	9	17	-50	-4	49	-50	5	41	-50	3	51	-50	-9	33	-50	2	75	0
CA00960_01	CA00960_01	4	33	-50	25	189	-50	-4	53	-50	-5	109	0	0	139	0	-1	54	-50	-14	15	-50	-2	38	-50	-3	46	-50	4	54	-50	2	56	-50	-2	60	-50	-5	72	-50
CA00962_01	CA00962_01	1458	3298	0	1282	2165	0	595	623	0	740	972	0	0	1946	0	771	1808	0	946	743	0	900	1079	0	1306	2090	0	1850	1943	0	171	1206	0	891	896	0	918	1382	0
CA00964_01	CA00964_01	473	526	0	520	854	0	163	186	0	154	290	0	0	612	0	309	551	0	412	822	0	332	348	0	416	778	0	272	723	0	123	442	0	141	325	0	187	431	0
CA00966_01	CA00966_01	-4	26	-50	13	242	0	-5	53	-50	0	63	0	0	98	0	0	57	-50	-15	7	-50	-9	15	-50	-7	41	-50	1	44	-50	0	49	-50	-8	62	-50	-6	69	-50
CA00967_01	CA00967_01	674	998	0	581	1132	0	267	195	0	309	484	0	0	821	0	297	565	0	502	601	0	491	494	0	616	896	0	504	861	0	110	495	0	287	441	0	337	583	0
CA00981_01	CA00981_01	-11	17	-50	7	182	-50	-9	54	-50	-7	76	-50	0	108	-50	-5	46	-50	-21	19	-50	-12	9	-50	-12	41	-50	6	34	-50	-3	39	-50	-2	61	-50	-10	50	-50
CA00983_01	CA00983_01	25272	35986	0	31507	14487	0	13002	6316	0	14071	16390	0	0	32114	0	14611	21815	0	23691	8736	0	20673	17794	0	23379	32738	0	22369	31240	0	1783	19132	0	13205	15817	0	18089	25056	0
CA00985_01	CA00985_01	1724	3486	0	1620	4911	0	681	691	0	695	1275	0	0	1754	0	861	1975	0	1428	2678	0	1336	1617	0	1519	2105	0	1362	1563	0	307	813	0	608	720	0	632	1104	0
CA00987_01	CA00987_01	57	165	0	60	295	0	16	95	0	18	98	0	0	159	0	45	188	0	45	167	0	48	129	0	48	99	0	89	168	0	9	119	0	65	100	0	26	117	0
CA00989_01	CA00989_01	161	248	0	237	479	0	75	105	0	56	147	0	0	326	0	115	202	0	117	196	0	133	133	0	109	264	0	116	233	0	28	147	0	37	158	0	76	167	0
CA00991_01	CA00991_01	970	1492	0	1037	709	0	474	312	0	412	510	0	0	1269	0	651	903	0	918	375	0	892	753	0	1009	1436	0	930	1553	0	58	808	0	454	622	0	693	967	0
CA01275_01	CA01275_01	-2	18	0	23	311	0	-3	40	-50	5	122	0	0	114	0	-5	49	-50	-1	42	-50	27	49	-50	4	68	0	8	45	-50	9	58	0	2	62	-50	1	83	-50
CA01276_01	CA01276_01	396	605	0	797	814	0	310	180	0	412	563	0	0	1143	0	388	810	0	503	558	0	475	592	0	540	1045	0	412	932	0	150	970	0	445	607	0	475	975	0
CA01278_01	CA01278_01	1061	561	0	1304	968	0	812	234	0	761	1036	0	0	2027	0	944	517	0	1114	501	0	1046	692	0	1195	1589	0	398	1788	0	145	1427	0	463	902	0	662	1112	0
CA01280_01	CA01280_01	609	848	0	912	918	0	371	194	0	450	627	0	0	1214	0	414	654	0	596	391	0	634	634	0	671	1122	0	474	1160	0	120	974	0	376	576	0	430	783	0
CA01282_01	CA01282_01	-6	30	0	26	268	0	-10	25	-50	7	106	0	0	146	0	-1	42	-50	1	44	-50	-2	22	-50	-3	39	-50	2	26	-50	7	62	-50	-11	16	-50	-3	62	-50
CA01284_01	CA01284_01	133	247	0	230	601	0	82	96	0	139	228	0	0	410	0	115	285	0	151	441	0	142	225	0	195	362	0	149	337	0	104	291	0	123	167	0	139	333	0
CA01298_01	CA01298_01	1883	1635	0	2369	947	0	881	396	0	1271	1330	0	0	2521	0	1496	1164	0	1745	1292	0	1700	1751	0	2087	3612	0	762	3612	0	235	2148	0	868	1496	0	1060	1885	0
CA01300_01	CA01300_01	-5	24	0	13	200	-50	-9	41	-50	-2	84	0	0	121	0	-2	43	-50	-9	38	-50	2	15	-50	-9	41	-50	7	41	-50	0	43	-50	-9	23	-50	-9	50	-50
CA01302_01	CA01302_01	3345	7472	0	4307	4960	0	2470	1318	0	2807	3408	0	0	7018	0	2564	5753	0	3220	2120	0	2877	2980	0	4135	6104	0	4882	5760	0	670	4312	0	2263	2889	0	3765	5590	0
CA01304_01	CA01304_01	305	555	0	454	369	0	201	175	0	223	298	0	0	655	0	211	522	0	264	178	0	226	434	0	304	672	0	265	600	0	46	439	0	223	287	0	248	528	0
CA00488_01	CA00488_01	4	32	0	16	191	-50	-4	38	-50	6	86	-50	0	110	0	2	57	-50	-10	37	-50	1	26	-50	-1	42	-50	4	43	-50	1	51	-50	-14	30	-50	-1	72	-50
CA01307_01	CA01307_01	-1	33	0	16	211	0	-7	43	-50	-1	76	-50	0	124	0	0	39	-50	-17	19	-50	2	24	-50	-3	47	-50	3	53	-50	1	48	-50	-10	23	-50	-6	59	-50
CA01321_01	CA01321_01	19	80	0	42	200	0	8	64	0	0	96	0	0	147	0	4	103	0	2	34	-50	21	155	0	8	79	0	31	56	-50	9	87	-50	179	42	0	0	76	0
CA00451_01	CA00451_01	627	894	0	733	463	0	206	141	0	253	358	0	0	846	0	309	551	0	360	242	0	310	454	0	427	1025	0	438	990	0	72	661	0	340	533	0	336	843	0
CA01324_01	CA01324_01	217	201	0	234	313	0	64	94	0	74	167	0	0	347	0	134	192	0	126	92	0	135	163	0	136	351	0	98	359	0	26	266	0	79	212	0	106	304	0
CA01326_01	CA01326_01	12	35	0	24	231	0	-6	53	-50	-1	77	-50	0	113	0	6	61	-50	-6	22	-50	3	26	-50	0	45	-50	8	42	-50	18	109	-50	-8	53	-50	1	92	-50
CA01328_01	CA01328_01	250	347	0	227	376	0	63	93	0	69	175	0	0	322	0	77	216	0	130	172	0	112	200	0	143	349	0	128	313	0	34	205	0	118	203	0	76	233	0
CA01330_01	CA01330_01	4174	1937	0	3588	1943	0	1433	625	0	1315	1358	0	0	4027	0	1677	1399	0	2642	1575	0	2437	1846	0	2933	3810	0	1051	4706	0	330	2561	0	1106	1978	0	1517	2796	0
CA01344_01	CA01344_01	122	254	0	167	313	0	62	105	0	52	143	0	0	282	0	70	169	0	90	117	0	97	129	0	111	249	0	110	270	0	15	124	0	73	166	0	80	216	0
CA01346_01	CA01346_01	65	85	0	50	334	0	-2	102	0	4	74	-50	0	153	0	3	99	0	-4	41	-50	0	45	-50	6	83	-50	8	60	-50	0	99	-50	-10	47	-50	4	79	-50
CA01348_01	CA01348_01	256	499	0	257	367	0	87	116	0	111	203	0	0	370	0	122	278	0	185	130	0	171	201	0	196	394	0	235	421	0	27	248	0	111	242	0	126	304	0
CA01350_01	CA01350_01	11	43	0	26	191	0	0	58	-50	-1	69	-50	0	123	0	2	74	0	-12	29	-50	0	22	-50	-2	64	-50	10	52	-50	-1	50	-50	3	74	-50	0	77	-50
CA01352_01	CA01352_01	692	1015	0	894	759	0	247	238	0	254	371	0	0	845	0	365	681	0	608	450	0	592	682	0	603	959	0	425	1021	0	59	506	0	354	431	0	357	650	0
CA01354_01	CA01354_01	721	1318	0	975	943	0	306	284	0	191	370	0	0	1186	0	285	643	0	504	476	0	618	607	0	532	1102	0	560	1063	0	82	704	0	359	493	0	298	589	0
CA01645_01	CA01645_01	104	206	0	268	512	0	110	106	0	122	240	0	0	424	0	114	231	0	137	303	0	159	206	0	129	320	0	87	289	0	72	293	0	98	198	0	82	261	0
CA01647_01	CA01647_01	64	136	0	149	493	0	21	91	-50	58	191	0	0	265	0	44	167	0	58	183	0	73	194	0	69	151	0	47	140	0	35	210	0	48	128	0	35	170	0
CA01649_01	CA01649_01	129	178	0	145	476	0	134	183	0	93	219	0	0	403	0	110	228	0	109	221	0	121	155	0	116	304	0	103	280	0	52	312	0	77	124	0	77	246	0
CA01650_01	CA01650_01	170	116	0	220	420	0	53	44	-50	124	204	0	0	454	0	147	161	0	169	276	0	184	139	0	189	376	0	53	433	0	82	382	0	66	180	0	131	339	0
CA01652_01	CA01652_01	811	2375	0	841	648	0	562	393	0	614	932	0	0	1581	0	709	1919	0	744	298	0	684	887	0	770	1437	0	1244	1395	0	89	1286	0	797	883	0	767	1246	0
CA01654_01	CA01654_01	476	468	0	779	581	0	244	190	0	303	483	0	0	838	0	371	439	0	575	431	0	540	721	0	598	962	0	231	972	0	98	813	0	286	481	0	395	730	0
CA01668_01	CA01668_01	9	42	0	19	222	0	0	20	-50	15	121	0	0	183	0	3	56	-50	2	70	-50	10	70	-50	8	79	-50	11	76	-50	11	96	-50	19	80	-50	2	101	0
CA01670_01	CA01670_01	372	375	0	357	604	0	210	176	0	225	406	0	0	676	0	274	240	0	317	214	0	320	329	0	385	568	0	169	652	0	68	468	0	197	310	0	256	495	0
CA01672_01	CA01672_01	175	219	0	240	367	0	138	136	0	140	236	0	0	495	0	155	220	0	175	161	0	214	278	0	237	395	0	139	434	0	50	358	0	177	266	0	202	373	0
CA01674_01	CA01674_01	0	35	0	30	244	0	-3	38	-50	-3	96	0	0	131	0	5	53	-50	-8	25	-50	8	16	-50	3	58	-50	6	52	-50	8	64	-50	-3	44	0	-1	66	-50
CA00496_01	CA00496_01	330	1141	0	425	755	0	198	239	0	185	281	0	0	655	0	212	884	0	278	438	0	309	509	0	363	555	0	617	538	0	87	420	0	323	288	0	214	454	0
CA01677_01	CA01677_01	5356	10120	0	6718	17993	0	2765	2283	0	2580	3794	0	0	8288	0	1964	5630	0	3551	5331	0	3424	4987	0	4373	8084	0	5662	6545	0	1316	4107	0	2777	3131	0	3326	4765	0
CA01691_01	CA01691_01	258	297	0	241	774	0	140	198	0	109	231	0	0	470	0	195	224	0	165	270	0	233	276	0	208	347	0	340	511	0	107	301	0	226	264	0	213	434	0
CA01693_01	CA01693_01	6	61	0	28	263	0	-4	42	-50	5	77	-50	0	138	0	4	49	-50	-6	45	-50	3	46	-50	7	72	-50	11	75	-50	3	101	0	7	71	-50	-1	93	0
CA01695_01	CA01695_01	209	278	0	194	366	0	61	87	0	71	170	0	0	327	0	105	146	0	119	97	0	128	115	0	158	291	0	116	290	0	25	213	0	63	179	0	100	239	0
CA01697_01	CA01697_01	3954	6170	0	3125	1685	0	1245	872	0	1214	1029	0	0	3978	0	2240	5184	0	2656	2202	0	2359	2845	0	2689	5057	0	2868	3763	0	408	2696	0	1901	1941	0	1495	2788	0
CA01699_01	CA01699_01	1728	2740	0	1335	933	0	591	566	0	495	705	0	0	1853	0	600	1027	0	1148	295	0	1075	1504	0	1348	1690	0	1550	2454	0	58	1448	0	930	1087	0	1069	1649	0
CA01700_01	CA01700_01	31	82	0	68	279	0	3	62	-50	11	107	0	0	164	0	20	86	-50	11	83	0	16	49	-50	22	98	-50	16	90	-50	14	77	-50	17	85	-50	9	85	-50
CA01712_01	CA01712_01	300	676	0	285	409	0	70	119	0	73	171	0	0	332	0	68	180	0	121	70	0	176	225	0	190	331	0	247	325	0	20	171	0	128	186	0	103	245	0
CA01714_01	CA01714_01	1327	1634	0	1176	814	0	567	322	0	527	750	0	0	1614	0	504	758	0	900	689	0	850	928	0	1036	1838	0	825	1688	0	130	1013	0	619	823	0	777	1281	0
CA01716_01	CA01716_01	6	38	0	28	262	0	3	54	-50	-2	88	0	0	153	0	5	62	-50	-4	20	-50	8	20	-50	5	71	-50	15	70	-50	7	76	-50	1	74	-50	11	77	-50
CA01718_01	CA01718_01	299	372	0	283	454	0	109	122	0	95	191	0	0	399	0	85	180	0	182	292	0	184	217	0	218	400	0	123	300	0	33	195	0	95	198	0	93	249	0
CA01720_01	CA01720_01	711	1016	0	811	1255	0	271	226	0	227	341	0	0	839	0	340	759	0	531	946	0	629	643	0	645	1077	0	529	821	0	100	426	0	323	398	0	306	572	0
CA01722_01	CA01722_01	938	1245	0	1263	1241	0	424	310	0	288	454	0	0	1370	0	381	653	0	650	830	0	736	855	0	769	1495	0	587	1327	0	122	730	0	441	664	0	347	743	0
CA02013_01	CA02013_01	386	383	0	848	1105	0	386	294	0	471	655	0	0	1251	0	399	441	0	460	731	0	498	618	0	401	921	0	208	814	0	238	1024	0	337	546	0	322	767	0
CA02015_01	CA02015_01	9	65	0	171	556	-50	-8	51	-50	19	132	0	0	191	0	10	59	0	11	53	-50	26	63	-50	18	100	0	0	85	-50	11	114	0	-5	75	-50	-2	119	0
CA02017_01	CA02017_01	264	307	0	292	499	0	148	180	0	179	310	0	0	584	0	146	270	0	196	217	0	204	255	0	215	394	0	129	372	0	55	373	0	121	202	0	93	256	0
CA02019_01	CA02019_01	915	2156	0	1118	807	0	605	422	0	816	997	0	0	2077	0	566	1484	0	726	400	0	770	1217	0	824	1602	0	1110	1607	0	120	1500	0	879	959	0	699	1228	0
CA02021_01	CA02021_01	20	86	0	59	292	0	7	20	-50	20	124	0	0	185	0	17	75	-50	24	74	-50	36	68	-50	27	86	-50	23	70	-50	17	99	-50	16	59	-50	20	124	0
CA02023_01	CA02023_01	1103	2393	0	1515	1212	0	772	368	0	1011	1357	0	0	2057	0	743	1754	0	1069	662	0	1045	1125	0	1389	2411	0	1551	2022	0	187	1767	0	779	1140	0	991	1552	0
CA02036_01	CA02036_01	40	76	0	86	296	0	20	29	-50	42	151	0	0	202	0	26	99	0	28	89	-50	40	91	0	43	137	0	32	166	0	14	115	-50	31	94	0	26	136	0
CA02038_01	CA02038_01	45	128	0	55	288	0	9	69	-50	25	142	0	0	224	0	11	123	0	12	49	-50	23	63	-50	26	114	0	36	131	0	6	61	-50	23	45	-50	19	129	0
CA02040_01	CA02040_01	124	158	0	178	403	0	62	74	0	75	143	0	0	364	0	97	146	0	119	154	0	144	133	0	147	263	0	73	322	0	44	232	0	2036	151	0	97	259	0
CA02042_01	CA02042_01	-1	28	0	20	163	-50	-8	33	-50	-1	102	0	0	136	0	0	51	-50	-10	39	-50	7	45	0	0	51	-50	0	52	-50	2	68	-50	-8	34	-50	-2	76	-50
CA02044_01	CA02044_01	0	54	0	24	267	0	-8	48	-50	1	84	0	0	126	0	-2	54	-50	-8	40	-50	22	35	-50	-4	35	-50	12	41	-50	9	64	-50	-2	32	-50	0	66	0
CA02046_01	CA02046_01	0	2	-50	25	155	-50	21	53	-50	11	31	-50	0	34	-50	19	39	-50	27	55	-50	17	34	-50	204	321	0	84	224	0	14	48	-50	32	48	-50	14	45	-50
CA02060_01	CA02060_01	1340	1725	0	1720	1470	0	712	542	0	865	1221	0	0	2333	0	731	909	0	1155	665	0	1188	998	0	1635	2110	0	1067	2235	0	168	1411	0	777	1214	0	1182	1748	0
CA02062_01	CA02062_01	45	117	0	74	490	0	15	67	0	18	125	0	0	186	0	27	111	0	33	118	0	34	64	-50	51	124	0	42	137	0	23	95	-50	30	98	-50	28	121	0
CA02064_01	CA02064_01	2	37	0	17	170	-50	-12	37	-50	-8	69	-50	0	111	0	-1	43	-50	-11	16	-50	0	27	-50	-8	38	-50	5	37	-50	4	55	-50	-7	52	-50	-6	57	-50
CA02066_01	CA02066_01	463	452	0	482	451	0	178	153	0	163	228	0	0	689	0	239	344	0	349	511	0	319	483	0	354	802	0	158	712	0	90	478	0	256	374	0	206	536	0
CA02068_01	CA02068_01	974	1309	0	1016	911	0	412	325	0	320	517	0	0	1290	0	613	774	0	826	845	0	714	995	0	876	1394	0	559	1453	0	147	893	0	522	666	0	543	1021	0
CA02070_01	CA02070_01	785	1470	0	1015	811	0	382	324	0	376	519	0	0	1266	0	453	788	0	739	450	0	700	757	0	913	1256	0	645	1215	0	107	829	0	528	639	0	573	941	0
CA02083_01	CA02083_01	919	1069	0	1024	1540	0	471	280	0	421	606	0	0	1370	0	439	605	0	806	1750	0	784	846	0	969	1479	0	523	1445	0	280	880	0	383	678	0	574	957	0
CA02085_01	CA02085_01	705	354	0	573	972	0	233	175	0	242	374	0	0	775	0	350	264	0	530	1235	0	457	428	0	580	886	0	149	928	0	184	506	0	267	444	0	361	637	0
CA02087_01	CA02087_01	805	914	0	580	577	0	267	230	0	274	425	0	0	826	0	312	643	0	504	380	0	436	515	0	572	1019	0	490	971	0	62	574	0	302	515	0	366	625	0
CA02089_01	CA02089_01	3	24	0	21	257	0	-10	46	-50	-4	105	0	0	114	0	-9	40	-50	-24	15	-50	-6	6	-50	-9	43	-50	1	31	-50	-6	51	-50	102	95	0	-5	54	-50
CA02091_01	CA02091_01	292	158	0	290	318	0	93	82	0	85	163	0	0	368	0	128	183	0	190	184	0	207	183	0	230	463	0	72	384	0	23	317	0	82	235	0	129	287	0
CA02093_01	CA02093_01	314	480	0	378	760	0	137	161	0	81	212	0	0	469	0	179	306	0	216	307	0	280	278	0	261	515	0	185	422	0	52	264	0	124	236	0	115	310	0
CA02373_01	CA02373_01	81	273	0	185	714	0	93	154	0	94	236	0	0	435	0	79	333	0	115	243	0	134	284	0	99	276	0	155	250	0	53	302	0	116	229	0	72	296	0
CA02375_01	CA02375_01	4	69	0	110	541	0	-5	43	-50	18	131	0	0	194	0	7	88	0	17	108	0	62	94	0	18	96	0	13	24	-50	16	88	0	3	72	-50	-1	72	-50
CA02377_01	CA02377_01	-14	23	-50	20	211	0	142	193	0	0	80	-50	0	119	0	-7	47	-50	-9	28	-50	3	34	-50	-10	33	-50	34	123	-50	1	48	-50	-11	14	-50	-11	42	-50
CA02379_01	CA02379_01	-11	11	-50	31	241	0	-19	13	-50	2	97	0	0	88	0	0	44	-50	-2	39	-50	14	35	-50	-6	36	-50	-2	4	-50	3	31	-50	-7	-5	-50	-6	43	-50
CA02381_01	CA02381_01	1490	2119	0	1966	1073	0	1011	672	0	1146	1374	0	0	2423	0	1042	1855	0	1537	924	0	1436	1623	0	1621	2408	0	903	1958	0	221	1911	0	905	1177	0	885	1634	0
CA02383_01	CA02383_01	130	212	0	205	394	0	64	32	-50	130	246	0	0	309	0	106	161	0	159	183	0	150	194	0	177	303	0	126	332	0	52	319	0	71	165	0	112	337	0
CA02397_01	CA02397_01	14	34	0	35	254	0	-4	11	-50	18	93	0	0	151	0	6	65	0	8	85	-50	31	86	0	12	67	-50	6	70	-50	12	78	-50	5	64	-50	8	88	-50
CA02399_01	CA02399_01	2298	3465	0	2471	1690	0	1034	753	0	1172	1517	0	0	3268	0	1086	2810	0	1569	1172	0	1810	2111	0	2035	3485	0	1909	2971	0	283	2417	0	1221	1758	0	1369	2413	0
CA02401_01	CA02401_01	639	483	0	719	943	0	445	262	0	482	772	0	0	1513	0	427	400	0	560	340	0	606	498	0	752	1213	0	336	1136	0	112	968	0	337	714	0	695	1108	0
CA02402_01	CA02402_01	1218	840	0	1706	907	0	1015	375	0	903	1064	0	0	2727	0	1199	1010	0	1435	1024	0	1429	1260	0	1761	2962	0	595	2684	0	199	1931	0	708	1368	0	1352	2296	0
CA02404_01	CA02404_01	-5	31	0	18	170	-50	-13	25	-50	-4	72	-50	0	110	0	-6	43	-50	-15	10	-50	-8	18	-50	-9	28	-50	-1	23	-50	-5	44	-50	-13	36	-50	-8	50	-50
CA02406_01	CA02406_01	1664	3394	0	2342	1234	0	1177	683	0	1315	1413	0	0	3490	0	1113	3031	0	1495	1433	0	1541	2363	0	1890	3637	0	2232	3093	0	418	2921	0	1359	1721	0	1692	3029	0
CA02420_01	CA02420_01	0	47	0	21	223	0	0	33	-50	1	72	-50	0	136	0	2	67	-50	-10	16	-50	12	31	-50	6	61	-50	14	58	-50	4	61	-50	6	40	-50	6	89	-50
CA02422_01	CA02422_01	506	1450	0	767	553	0	284	248	0	359	560	0	0	1017	0	250	718	0	448	260	0	406	592	0	540	1098	0	720	864	0	76	752	0	455	588	0	425	704	0
CA02424_01	CA02424_01	3	33	0	10	192	0	-11	37	-50	-11	61	-50	0	95	-50	-5	35	-50	-20	7	-50	-15	8	-50	-8	31	-50	0	34	-50	-3	41	-50	-17	44	-50	-11	57	-50
CA02426_01	CA02426_01	1	51	0	26	287	0	-6	40	-50	-6	84	0	0	124	0	-1	55	-50	-16	95	0	-1	32	-50	2	45	-50	21	44	-50	7	62	-50	20	31	0	-6	74	-50
CA00524_01	CA00524_01	-16	33	0	120	151	0	-13	44	-50	-14	65	-50	0	135	0	-6	34	-50	-17	6	-50	-9	4	-50	-10	42	-50	3	40	-50	0	48	-50	-3	56	-50	-8	55	-50
CA02429_01	CA02429_01	-2	29	0	21	169	0	-11	36	-50	-13	67	-50	0	94	-50	-4	33	-50	-18	13	-50	-13	18	-50	-9	30	-50	-1	27	-50	-1	54	-50	-10	69	-50	-8	62	-50
CA00525_01	CA00525_01	100	114	0	96	299	0	30	106	0	30	111	0	0	221	0	58	136	0	64	168	0	53	246	0	76	186	0	48	231	0	38	172	0	70	132	0	59	183	0
CA02444_01	CA02444_01	130	70	0	103	384	0	38	108	0	38	146	0	0	267	0	61	85	0	90	191	0	87	172	0	113	217	0	31	361	0	23	211	0	71	211	0	117	278	0
CA02446_01	CA02446_01	664	388	0	532	736	0	242	182	0	220	307	0	0	728	0	262	279	0	436	596	0	382	468	0	460	880	0	173	911	0	111	496	0	229	414	0	244	512	0
CA02448_01	CA02448_01	305	612	0	273	459	0	120	146	0	87	228	0	0	451	0	103	307	0	189	102	0	175	169	0	211	431	0	269	443	0	25	264	0	116	260	0	201	352	0
CA02450_01	CA02450_01	837	1341	0	802	551	0	322	287	0	247	338	0	0	961	0	336	678	0	504	379	0	512	799	0	576	1169	0	680	1059	0	91	743	0	454	574	0	418	808	0
CA02451_01	CA02451_01	2618	3624	0	3205	1827	0	1546	749	0	1265	1201	0	0	4096	0	1687	2675	0	2311	2715	0	2381	2576	0	2790	5040	0	1841	4279	0	489	2662	0	1516	1942	0	1900	3174	0
CA02737_01	CA02737_01	1	48	0	32	333	0	11	109	0	6	136	0	0	197	0	287	927	0	27	60	-50	39	110	0	9	74	0	1	67	-50	7	89	-50	9	88	-50	-6	74	0
CA02739_01	CA02739_01	49	148	0	229	833	0	31	62	-50	70	184	0	0	327	0	55	195	0	63	203	0	81	150	0	67	227	0	56	158	0	50	196	0	45	153	0	39	171	0
CA02740_01	CA02740_01	-14	28	0	15	162	0	161	205	0	-3	79	0	0	126	0	-10	43	-50	-9	23	-50	7	33	-50	-5	30	-50	-3	41	-50	-1	43	-50	-12	1	-50	-11	37	-50
CA02742_01	CA02742_01	-7	37	0	24	325	0	-19	36	-50	3	129	0	0	153	0	-7	43	-50	-1	51	-50	9	36	-50	-2	55	-50	0	16	-50	2	55	-50	-15	7	-50	-10	70	-50
CA02744_01	CA02744_01	-1	24	0	21	286	0	-5	5	-50	9	78	-50	0	116	0	2	46	0	7	53	-50	9	40	-50	4	61	-50	2	46	-50	12	62	-50	-2	17	-50	0	58	-50
CA02746_01	CA02746_01	-5	29	0	30	193	-50	-8	-7	-50	2	84	-50	0	69	0	-8	30	-50	-7	37	-50	-3	14	-50	-5	29	-50	-3	-4	-50	-2	20	-50	-16	24	-50	-10	60	-50
CA02760_01	CA02760_01	58	180	0	90	483	0	24	26	-50	46	194	0	0	282	0	46	176	0	42	151	0	74	135	0	67	186	0	62	145	0	27	135	0	48	116	0	45	182	0
CA02762_01	CA02762_01	308	481	0	402	389	0	202	125	0	233	340	0	0	725	0	199	422	0	268	196	0	286	315	0	314	685	0	281	577	0	44	504	0	183	311	0	258	497	0
CA02764_01	CA02764_01	-8	29	-50	18	185	-50	-11	33	-50	-2	77	-50	0	111	0	-7	43	-50	-18	21	-50	0	24	-50	-6	35	-50	-2	29	-50	1	29	-50	-8	29	-50	-10	61	-50
CA02766_01	CA02766_01	8	63	0	25	243	0	-2	32	-50	3	81	0	0	132	0	6	92	0	0	23	-50	12	54	-50	8	58	-50	18	57	-50	3	56	-50	54	42	-50	7	83	0
CA02768_01	CA02768_01	840	1100	0	1117	707	0	613	267	0	533	814	0	0	1694	0	750	1175	0	954	773	0	912	796	0	1008	2219	0	595	2204	0	218	1638	0	450	1026	0	1016	1856	0
CA02770_01	CA02770_01	2438	1351	0	3520	1696	0	2202	665	0	2022	2734	0	0	6106	0	1512	690	0	2058	545	0	2185	1020	0	2679	3583	0	621	3709	0	209	3141	0	901	2411	0	2784	3810	0
CA02784_01	CA02784_01	1000	2994	0	1447	790	0	583	502	0	827	979	0	0	2173	0	565	2059	0	847	468	0	1011	1618	0	1104	2599	0	1867	2158	0	146	1788	0	1208	1411	0	1185	1962	0
CA02786_01	CA02786_01	345	507	0	476	352	0	191	118	0	250	309	0	0	746	0	154	282	0	272	209	0	284	282	0	330	716	0	210	634	0	48	464	0	196	358	0	232	525	0
CA02788_01	CA02788_01	909	2833	0	1023	655	0	520	422	0	561	877	0	0	1588	0	464	1301	0	800	231	0	731	892	0	949	1582	0	1334	1479	0	62	1128	0	794	898	0	856	1256	0
CA02790_01	CA02790_01	162	278	0	190	576	0	131	109	0	96	215	0	0	365	0	107	175	0	145	163	0	137	158	0	176	302	0	134	282	0	35	233	0	192	219	0	152	288	0
CA02792_01	CA02792_01	9	41	0	8	340	0	-10	45	-50	-17	72	-50	0	107	0	-7	38	-50	-21	30	-50	-11	8	-50	-16	37	-50	-5	28	-50	-1	58	-50	-16	52	-50	-11	60	-50
CA02794_01	CA02794_01	579	837	0	588	910	0	252	188	0	264	302	0	0	802	0	273	736	0	469	899	0	405	544	0	485	828	0	477	723	0	152	570	0	304	430	0	320	600	0
CA02808_01	CA02808_01	870	462	0	697	526	0	399	198	0	365	560	0	0	962	0	496	336	0	561	365	0	483	417	0	632	1062	0	242	1068	0	96	778	0	355	610	0	613	949	0
CA02810_01	CA02810_01	291	374	0	219	323	0	112	102	0	93	188	0	0	395	0	145	270	0	160	147	0	151	182	0	184	358	0	171	420	0	25	227	0	120	219	0	130	319	0
CA02811_01	CA02811_01	3407	2431	0	2731	1312	0	1323	740	0	1199	1206	0	0	3497	0	1504	2069	0	2211	1978	0	1996	2483	0	2308	4265	0	1456	4027	0	379	2197	0	1522	2079	0	1662	3023	0
CA02813_01	CA02813_01	9	19	0	20	181	-50	-7	33	-50	-2	58	-50	0	64	-50	-3	47	-50	-18	21	-50	-7	14	-50	-11	39	-50	6	22	-50	1	45	-50	-2	54	-50	2	62	-50
CA02815_01	CA02815_01	319	410	0	347	557	0	121	135	0	73	226	0	0	440	0	115	221	0	187	235	0	238	297	0	227	477	0	185	453	0	34	226	0	144	244	0	115	284	0
CA02817_01	CA02817_01	609	936	0	677	586	0	295	289	0	244	310	0	0	963	0	313	649	0	514	353	0	459	782	0	534	1103	0	340	910	0	61	694	0	447	611	0	403	777	0
CA03099_01	CA03099_01	0	32	0	29	281	-50	5	61	-50	2	116	0	0	145	0	-1	51	-50	-3	50	-50	17	38	0	0	60	0	3	52	-50	5	63	-50	-7	57	-50	-7	66	-50
CA03100_01	CA03100_01	161	129	0	306	537	0	145	69	-50	219	432	0	0	687	0	213	140	0	211	103	0	218	185	0	241	500	0	48	402	0	26	541	0	106	294	0	255	474	0
CA03102_01	CA03102_01	1256	1734	0	1436	1489	0	1200	508	0	1085	1538	0	0	3185	0	878	1181	0	1180	873	0	1116	1056	0	1157	2156	0	939	2371	0	332	2690	0	765	1581	0	1073	2267	0
CA03104_01	CA03104_01	53	100	0	82	357	0	17	34	-50	48	144	0	0	229	0	31	128	0	47	169	0	61	107	0	45	140	0	44	122	0	37	139	0	30	46	-50	16	113	0
CA03106_01	CA03106_01	202	325	0	273	675	0	151	96	0	187	321	0	0	466	0	124	235	0	174	225	0	206	233	0	220	363	0	185	322	0	64	313	0	135	218	0	163	350	0
CA03108_01	CA03108_01	-6	22	0	25	260	0	-8	-2	-50	12	69	0	0	103	-50	0	39	0	-9	20	-50	-2	25	-50	-4	31	-50	0	12	-50	1	39	-50	-10	25	-50	-7	60	-50
CA03122_01	CA03122_01	-6	20	0	15	191	0	-9	2	-50	5	73	0	0	108	0	-7	41	-50	-17	18	-50	-4	18	-50	-7	37	-50	0	41	-50	-2	38	-50	-12	24	-50	-9	58	-50
CA03124_01	CA03124_01	2399	4573	0	2935	3374	0	1786	999	0	2094	2831	0	0	4961	0	1770	3853	0	2092	2345	0	2536	2661	0	2861	4559	0	3181	4583	0	856	4272	0	1842	2740	0	2634	4406	0
CA03126_01	CA03126_01	270	570	0	405	576	0	192	173	0	195	299	0	0	720	0	153	485	0	201	327	0	243	501	0	268	559	0	258	468	0	81	378	0	246	304	0	186	444	0
CA03128_01	CA03128_01	131	208	0	180	378	0	120	83	0	110	220	0	0	438	0	104	196	0	130	175	0	174	182	0	165	329	0	104	306	0	38	256	0	90	200	0	143	343	0
CA03130_01	CA03130_01	1945	2916	0	2688	2069	0	1411	639	0	1410	1712	0	0	4163	0	1190	2270	0	1626	1385	0	1876	1933	0	2042	3799	0	1779	4058	0	429	3030	0	1254	2149	0	1694	3250	0
CA03132_01	CA03132_01	347	419	0	452	714	0	256	169	0	295	450	0	0	860	0	280	367	0	329	326	0	355	294	0	397	657	0	211	652	0	84	506	0	232	453	0	352	679	0
CA03144_01	CA03144_01	602	1336	0	827	733	0	370	305	0	399	609	0	0	1394	0	370	827	0	512	329	0	640	773	0	668	1235	0	728	1068	0	103	967	0	525	781	0	656	1088	0
CA03146_01	CA03146_01	0	25	0	19	224	0	-4	35	-50	-2	59	-50	0	127	0	-1	39	-50	-11	19	-50	-3	15	-50	-3	40	-50	7	25	-50	3	55	-50	-8	42	-50	-4	60	-50
CA03148_01	CA03148_01	157	291	0	157	563	0	83	98	0	81	208	0	0	384	0	81	174	0	111	104	0	115	104	0	154	260	0	140	236	0	35	213	0	92	188	0	134	257	0
CA00557_01	CA00557_01	122	190	0	127	292	0	44	81	0	52	145	0	0	277	0	72	136	0	64	93	0	55	98	0	85	232	0	66	207	0	24	198	0	79	168	0	69	226	0
CA03151_01	CA03151_01	1328	3389	0	1246	1007	0	774	697	0	588	920	0	0	1864	0	495	1450	0	834	222	0	777	882	0	1018	1744	0	1452	1514	0	84	1170	0	1066	979	0	1003	1482	0
CA03153_01	CA03153_01	421	388	0	415	355	0	149	113	0	157	220	0	0	571	0	180	295	0	281	239	0	256	360	0	289	723	0	190	693	0	52	546	0	222	431	0	233	557	0
CA03166_01	CA03166_01	1659	1580	0	1409	1651	0	692	400	0	680	794	0	0	1992	0	863	1628	0	1209	2387	0	1015	1285	0	1298	2442	0	887	2002	0	378	1455	0	762	1287	0	925	1870	0
CA03168_01	CA03168_01	372	523	0	278	552	0	185	148	0	135	276	0	0	582	0	121	252	0	219	181	0	246	242	0	257	465	0	239	449	0	40	315	0	144	294	0	182	385	0
CA03170_01	CA03170_01	-4	24	0	10	209	0	-13	37	-50	-5	59	-50	0	113	0	-10	41	-50	-20	21	-50	-13	20	-50	-14	48	-50	-6	34	-50	0	45	-50	-23	39	-50	-9	54	-50
CA03172_01	CA03172_01	2283	4391	0	1978	907	0	875	595	0	766	846	0	0	2695	0	856	2854	0	1368	597	0	1248	1625	0	1463	3200	0	2166	2839	0	143	1938	0	1344	1524	0	1289	2277	0
CA03174_01	CA03174_01	1213	481	0	1185	597	0	565	242	0	412	596	0	0	1451	0	625	287	0	984	351	0	880	501	0	967	1821	0	151	1299	0	76	1088	0	387	892	0	755	1161	0
CA00559_01	CA00559_01	215	235	0	273	299	0	114	113	0	83	147	0	0	357	0	107	190	0	127	142	0	148	210	0	179	380	0	81	344	0	28	287	0	122	228	0	115	286	0
CA03463_01	CA03463_01	3878	5991	0	7645	4580	0	3016	2099	0	3073	4424	0	0	8444	0	3868	8885	0	5000	4993	0	4880	7089	0	4230	9746	0	3596	6933	0	1060	7433	0	4023	4831	0	3249	5708	0
CA03465_01	CA03465_01	42	119	0	166	668	0	22	108	-50	58	225	0	0	316	0	41	139	0	48	112	0	56	165	0	53	182	0	38	208	0	15	254	0	45	151	0	38	218	0
CA03467_01	CA03467_01	86	190	0	100	602	0	137	183	0	72	172	0	0	296	0	33	230	0	51	309	0	56	163	0	56	179	0	117	133	0	75	146	0	61	71	-50	39	167	0
CA03469_01	CA03469_01	2097	478	0	1920	1705	0	1093	1201	0	1508	3166	0	0	3766	0	1274	1079	0	1474	296	0	1592	1713	0	1672	2467	0	211	3714	0	41	3388	0	1407	2146	0	880	2769	0
CA03471_01	CA03471_01	133	317	0	224	360	0	111	133	0	129	218	0	0	405	0	94	315	0	97	144	0	117	323	0	115	337	0	176	308	0	37	331	0	237	208	0	89	267	0
CA03473_01	CA03473_01	445	759	0	587	949	0	367	214	0	361	572	0	0	865	0	269	570	0	410	531	0	459	465	0	502	849	0	397	739	0	143	692	0	305	505	0	344	687	0
CA03486_01	CA03486_01	1095	2280	0	1122	1221	0	674	507	0	813	1037	0	0	1700	0	627	1932	0	736	1070	0	812	1401	0	915	2030	0	1239	1650	0	385	1676	0	1031	1058	0	749	1420	0
CA03488_01	CA03488_01	756	1230	0	545	1466	0	448	350	0	486	710	0	0	1250	0	353	889	0	476	853	0	524	618	0	618	958	0	626	1059	0	247	849	0	506	600	0	420	865	0
CA03489_01	CA03489_01	966	1385	0	1203	2148	0	688	412	0	744	917	0	0	2466	0	745	1546	0	901	2062	0	1077	1452	0	1216	2182	0	1024	1864	0	606	1612	0	787	1116	0	747	1552	0
CA03491_01	CA03491_01	673	945	0	806	842	0	487	291	0	443	653	0	0	1453	0	359	583	0	480	305	0	596	799	0	663	1176	0	475	1127	0	96	830	0	388	639	0	500	879	0
CA03492_01	CA03492_01	27	105	0	44	360	0	16	36	-50	22	103	0	0	169	0	14	115	0	8	123	-50	8	33	-50	24	103	0	45	75	-50	31	58	-50	23	60	-50	18	91	-50
CA03494_01	CA03494_01	384	671	0	563	1099	0	255	221	0	281	462	0	0	947	0	379	732	0	420	725	0	444	495	0	482	970	0	372	783	0	180	673	0	345	488	0	324	721	0
CA03507_01	CA03507_01	813	1893	0	1107	1246	0	429	436	0	592	828	0	0	1790	0	452	1218	0	611	656	0	718	1053	0	761	1590	0	1085	1396	0	215	1081	0	927	885	0	722	1199	0
CA03509_01	CA03509_01	646	796	0	704	505	0	290	202	0	338	412	0	0	1002	0	283	545	0	497	393	0	506	669	0	546	1103	0	341	1135	0	95	820	0	479	658	0	478	977	0
CA03511_01	CA03511_01	212	306	0	164	396	0	74	100	0	102	181	0	0	352	0	67	193	0	98	98	0	123	128	0	138	248	0	154	261	0	23	228	0	100	211	0	124	250	0
CA03513_01	CA03513_01	791	601	0	630	486	0	272	202	0	272	402	0	0	930	0	372	463	0	519	455	0	432	523	0	535	881	0	309	1020	0	92	749	0	360	556	0	451	836	0
CA03515_01	CA03515_01	588	1473	0	583	1069	0	319	285	0	309	563	0	0	983	0	247	765	0	445	262	0	400	332	0	477	750	0	750	743	0	72	590	0	302	493	0	386	622	0
CA03517_01	CA03517_01	3	26	-50	14	180	0	-6	42	-50	-5	61	-50	0	93	-50	-8	44	-50	-17	8	-50	-5	10	-50	-4	47	-50	12	39	-50	6	75	-50	12	68	-50	106	82	-50
CA03531_01	CA03531_01	13	26	0	18	194	-50	-8	37	-50	28	173	-50	0	97	0	-2	45	-50	-12	22	-50	-2	15	-50	-1	32	-50	9	40	-50	4	60	-50	0	64	-50	-3	53	-50
CA03533_01	CA03533_01	1079	2306	0	768	835	0	530	400	0	431	723	0	0	1473	0	592	1368	0	768	336	0	708	692	0	886	1329	0	1110	1269	0	98	987	0	656	833	0	761	1194	0
CA03535_01	CA03535_01	513	510	0	357	439	0	225	132	0	203	290	0	0	654	0	179	290	0	302	277	0	279	311	0	324	735	0	246	757	0	49	401	0	212	413	0	256	530	0
CA03537_01	CA03537_01	1207	1287	0	1009	863	0	501	245	0	366	459	0	0	1409	0	487	719	0	683	455	0	746	633	0	810	1427	0	587	1422	0	83	816	0	413	759	0	538	985	0
CA03539_01	CA03539_01	1135	1216	0	1406	1792	0	529	465	0	422	641	0	0	1419	0	709	734	0	1138	1104	0	1106	1177	0	1350	1582	0	423	1285	0	123	803	0	579	909	0	744	1245	0
CA03541_01	CA03541_01	1062	2528	0	1262	771	0	680	417	0	534	591	0	0	1742	0	700	1463	0	996	364	0	972	892	0	1142	2064	0	1061	1749	0	58	1126	0	722	1099	0	1091	1716	0
CA03824_01	CA03824_01	97	185	0	223	534	0	128	128	0	130	229	0	251	437	0	101	281	0	111	378	0	123	207	0	103	258	0	109	319	0	95	290	0	115	197	0	89	250	0
CA03826_01	CA03826_01	516	1193	0	921	799	0	506	364	0	510	760	0	1122	1578	0	461	996	0	615	336	0	544	621	0	608	1139	0	724	1303	0	112	1343	0	522	777	0	462	957	0
CA03828_01	CA03828_01	4585	4663	0	4150	6174	0	4650	2513	0	3792	4296	0	7831	8931	0	3083	4068	0	3880	4908	0	3639	4561	0	4217	6628	0	2949	7398	0	1597	7271	0	3239	4494	0	3462	6142	0
CA03830_01	CA03830_01	141	175	0	204	403	0	82	46	-50	81	163	0	303	427	0	85	164	0	107	129	0	153	178	0	127	267	0	97	268	0	46	304	0	80	170	0	81	235	0
CA03832_01	CA03832_01	-9	18	-50	23	222	0	-14	-9	-50	9	94	0	34	105	-50	-6	38	-50	-6	27	-50	0	17	-50	-10	39	-50	-2	43	-50	2	37	-50	-22	22	-50	-13	61	-50
CA03834_01	CA03834_01	535	805	0	641	1137	0	406	249	0	540	693	0	595	994	0	350	690	0	475	968	0	537	602	0	550	1121	0	467	1061	0	309	1050	0	359	616	0	459	1010	0
CA03848_01	CA03848_01	5	18	-50	16	136	-50	-10	-4	-50	5	80	-50	35	107	-50	-7	34	-50	-16	16	-50	-6	7	-50	-8	28	-50	-2	32	-50	0	32	-50	7	26	-50	-2	47	-50
CA03850_01	CA03850_01	271	409	0	269	400	0	143	166	0	178	309	0	345	559	0	171	410	0	189	209	0	243	344	0	240	473	0	218	467	0	68	409	0	202	290	0	205	473	0
CA03852_01	CA03852_01	96	149	0	128	460	0	103	119	0	77	169	0	290	347	0	84	168	0	80	181	0	106	148	0	103	203	0	98	237	0	52	171	0	116	176	0	99	253	0
CA03854_01	CA03854_01	381	651	0	520	798	0	327	227	0	323	424	0	837	1003	0	336	645	0	417	597	0	473	576	0	478	823	0	456	941	0	175	787	0	373	522	0	414	826	0
CA03856_01	CA03856_01	-3	48	0	30	195	0	-7	30	-50	-1	86	0	49	114	-50	9	63	-50	-5	41	-50	1	24	-50	3	42	-50	7	52	-50	11	39	-50	10	39	-50	4	80	-50
CA03858_01	CA03858_01	1041	2584	0	1273	1784	0	640	763	0	678	819	0	1710	1929	0	682	2790	0	1005	1468	0	1112	2323	0	1188	1914	0	1311	1510	0	385	1123	0	1219	950	0	623	1208	0
CA03871_01	CA03871_01	1130	1624	0	1178	1651	0	456	405	0	607	753	0	968	1923	0	898	1996	0	1026	2183	0	1187	1382	0	1061	2351	0	1090	2295	0	401	1665	0	749	1122	0	689	1621	0
CA03873_01	CA03873_01	173	220	0	163	329	0	63	100	0	81	199	0	202	370	0	53	126	0	73	51	-50	113	141	0	104	244	0	95	262	0	8	184	0	72	197	0	87	283	0
CA03875_01	CA03875_01	1502	1924	0	1279	779	0	749	361	0	898	864	0	1690	2430	0	623	1208	0	1022	1015	0	987	1321	0	1137	2505	0	1264	2354	0	299	1765	0	1217	1483	0	1148	2102	0
CA03877_01	CA03877_01	68	72	0	65	243	0	25	44	-50	7	72	-50	102	176	-50	47	84	0	21	75	-50	33	76	-50	35	103	0	48	122	0	31	71	-50	41	77	-50	19	114	0
CA03879_01	CA03879_01	-4	92	0	9	463	0	-15	129	0	-10	186	0	33	225	-50	-9	85	-50	-20	53	-50	-9	63	-50	-13	86	-50	2	71	-50	0	125	0	-4	102	0	-9	148	0
CA03881_01	CA03881_01	3	18	0	17	168	-50	-9	29	-50	-9	64	-50	33	74	-50	0	46	-50	-16	14	-50	-6	5	-50	-11	19	-50	3	35	-50	1	30	-50	-14	32	-50	-4	52	-50
CA03895_01	CA03895_01	9	25	0	19	181	0	-5	35	-50	-11	55	-50	33	79	-50	-2	36	-50	-11	25	-50	-9	28	-50	-4	37	-50	0	11	-50	-2	57	-50	-10	34	-50	11	79	-50
CA03897_01	CA03897_01	4	30	-50	20	178	0	-1	40	-50	-3	70	-50	33	103	-50	-3	46	-50	-13	17	-50	-7	20	-50	-10	39	-50	3	35	-50	2	54	-50	-7	58	-50	1	60	-50
CA03899_01	CA03899_01	424	275	0	346	737	0	196	186	0	157	254	0	405	528	0	184	238	0	224	483	0	223	314	0	248	413	0	112	570	0	81	287	0	152	332	0	179	377	0
CA03901_01	CA03901_01	171	216	0	146	320	0	80	75	0	62	148	0	154	280	0	46	163	0	72	130	0	84	131	0	95	256	0	104	203	0	30	149	0	104	172	0	101	226	0
CA03903_01	CA03903_01	2334	4301	0	2575	3318	0	1306	922	0	978	1412	0	2115	3094	0	1160	2575	0	1692	1562	0	1613	1812	0	2047	3269	0	2095	3023	0	319	1815	0	1388	1670	0	1482	2363	0
CA03905_01	CA03905_01	976	894	0	1103	957	0	585	337	0	424	613	0	977	1375	0	553	593	0	858	723	0	866	847	0	1015	1714	0	447	1521	0	96	854	0	493	806	0	760	1207	0
CA04192_01	CA04192_01	1057	1759	0	1828	1701	0	1261	784	0	1224	1699	0	2730	3472	0	1027	1770	0	1164	1136	0	1161	1389	0	1165	2137	0	1138	2346	0	467	2691	0	1144	1592	0	1568	2543	0
CA04194_01	CA04194_01	11	52	0	83	473	0	1	47	-50	22	123	0	44	181	0	13	89	0	17	98	0	36	86	-50	20	109	0	12	104	-50	21	132	-50	9	79	-50	7	110	-50
CA00597_01	CA00597_01	214	473	0	350	403	0	191	137	0	211	372	0	448	666	0	211	521	0	221	175	0	212	379	0	238	514	0	296	563	0	58	633	0	309	342	0	198	457	0
CA04197_01	CA04197_01	-14	36	0	21	366	0	-29	42	-50	-1	161	0	4	222	0	-1	91	-50	-5	93	-50	7	79	-50	10	138	0	9	129	-50	8	189	0	-2	83	-50	-8	170	-50
CA04199_01	CA04199_01	3370	6629	0	3777	8884	0	3028	2318	0	3576	4751	0	6552	7663	0	2588	5514	0	2729	3211	0	2961	3749	0	3480	5806	0	4236	5615	0	1248	5891	0	3215	3985	0	3370	5406	0
CA04201_01	CA04201_01	985	1836	0	1177	1221	0	933	311	0	1104	1373	0	1333	2152	0	733	1469	0	990	1165	0	1014	805	0	1153	2177	0	1509	2466	0	448	2571	0	711	1570	0	1201	2454	0
CA04215_01	CA04215_01	283	398	0	354	653	0	231	182	0	245	373	0	346	618	0	254	441	0	278	719	0	278	405	0	344	614	0	236	675	0	189	632	0	267	387	0	274	614	0
CA04217_01	CA04217_01	2843	5954	0	2728	1432	0	2216	1397	0	2480	2936	0	4717	5926	0	2030	5409	0	2267	1806	0	2665	3654	0	3064	6153	0	3947	6232	0	663	6451	0	2967	3484	0	3087	5666	0
CA04219_01	CA04219_01	348	565	0	452	416	0	215	135	0	160	232	0	559	752	0	158	380	0	187	198	0	253	279	0	229	524	0	292	552	0	67	443	0	212	313	0	203	426	0
CA04221_01	CA04221_01	737	864	0	967	1706	0	635	425	0	469	700	0	1541	1952	0	441	768	0	605	1082	0	672	920	0	694	1456	0	494	1707	0	281	1421	0	593	970	0	670	1388	0
CA04223_01	CA04223_01	362	739	0	393	717	0	323	239	0	289	504	0	633	854	0	212	473	0	296	240	0	342	372	0	383	590	0	400	692	0	73	520	0	301	379	0	368	615	0
CA04225_01	CA04225_01	377	765	0	517	480	0	303	153	0	266	407	0	539	927	0	225	464	0	299	315	0	350	344	0	353	856	0	369	820	0	99	616	0	282	474	0	317	635	0
CA04239_01	CA04239_01	131	284	0	142	499	0	57	114	0	90	175	0	208	358	0	78	227	0	92	296	0	102	169	0	115	247	0	122	241	0	90	211	0	126	195	0	105	259	0
CA04241_01	CA04241_01	-1	29	0	18	219	-50	-12	34	-50	-4	90	-50	2	105	0	-5	34	-50	-22	6	-50	-14	4	-50	-7	23	-50	0	14	-50	0	-10	-50	-16	31	-50	-11	51	-50
CA04243_01	CA04243_01	481	728	0	417	689	0	254	213	0	296	435	0	650	909	0	247	497	0	341	461	0	353	419	0	407	677	0	339	755	0	114	512	0	313	465	0	277	572	0
CA04245_01	CA04245_01	45	36	0	55	205	0	14	85	0	17	83	0	36	174	0	11	42	-50	11	45	-50	9	118	-50	29	107	0	8	187	0	5	130	-50	603	150	0	22	142	0
CA04247_01	CA04247_01	6	20	0	18	192	-50	-8	19	-50	-9	53	-50	-6	84	-50	-6	35	-50	-20	13	-50	-15	3	-50	-9	22	-50	1	41	-50	2	40	-50	-19	21	-50	-6	39	-50
CA04249_01	CA04249_01	276	416	0	258	378	0	135	117	0	132	279	0	270	445	0	132	268	0	176	179	0	171	188	0	181	337	0	178	347	0	46	287	0	131	264	0	520	1434	0
CA04263_01	CA04263_01	354	281	0	286	378	0	142	106	0	153	221	0	235	434	0	164	178	0	201	209	0	197	179	0	232	401	0	133	399	0	48	267	0	126	258	0	175	392	0
CA04265_01	CA04265_01	5769	11226	0	4532	3773	0	2773	1821	0	2851	2864	0	5438	7650	0	2578	8469	0	3427	3654	0	3393	5165	0	4141	7389	0	6086	6932	0	834	4386	0	4243	4199	0	4059	6067	0
CA04267_01	CA04267_01	7181	6555	0	4931	6427	0	2897	1672	0	2320	3630	0	4947	6772	0	2803	2970	0	3747	2011	0	3910	2924	0	4575	5544	0	3133	7099	0	507	3847	0	2353	3826	0	3733	5227	0
CA04269_01	CA04269_01	278	327	0	214	308	0	92	101	0	72	170	0	134	337	0	132	205	0	129	119	0	117	172	0	141	304	0	108	294	0	21	215	0	78	204	0	98	265	0
CA04271_01	CA04271_01	162	254	0	187	287	0	71	100	0	54	167	0	142	309	0	79	201	0	105	129	0	105	183	0	126	225	0	144	251	0	25	140	0	104	164	0	103	210	0
CA04273_01	CA04273_01	202	262	0	236	389	0	112	77	0	75	149	0	149	342	0	144	272	0	178	298	0	158	160	0	199	364	0	107	339	0	44	259	0	94	206	0	134	310	0
CA04561_01	CA04561_01	91	168	0	170	453	0	151	149	0	127	275	0	259	460	0	107	232	0	181	278	0	143	203	0	117	284	0	118	309	0	77	313	0	113	224	0	113	302	0
CA04563_01	CA04563_01	177	407	0	459	867	-50	196	148	0	204	423	0	469	724	0	143	327	0	174	223	0	192	228	0	191	426	0	225	465	0	59	492	0	130	330	0	169	395	0
CA04565_01	CA04565_01	-8	21	-50	21	212	0	-28	-58	-50	2	84	-50	3	142	0	-10	34	-50	-18	3	-50	-1	16	-50	-4	22	-50	-5	16	-50	3	46	-50	-20	-19	-50	-7	50	-50
CA00607_01	CA00607_01	8814	17113	0	12697	12915	0	8515	4237	0	10739	9798	0	24161	23340	0	7667	18790	0	9369	12664	0	8372	9783	0	10160	16947	0	13960	16314	0	4212	14513	0	8053	10169	0	8391	13085	0
CA04568_01	CA04568_01	283	596	0	457	700	0	230	162	0	257	376	0	428	735	0	213	611	0	275	450	0	310	498	0	313	729	0	346	649	0	134	677	0	338	411	0	280	612	0
CA04570_01	CA04570_01	801	1018	0	1000	889	0	728	408	0	647	934	0	943	2189	0	1120	1599	0	1252	1404	0	2328	2172	0	1646	4319	0	1077	4678	0	592	4518	0	1929	2007	0	1443	2798	0
CA04583_01	CA04583_01	41	149	0	81	262	0	36	11	-50	58	161	0	67	219	0	41	125	0	41	63	-50	66	64	-50	68	131	0	85	156	0	34	166	0	38	82	0	69	174	0
CA04585_01	CA04585_01	-8	26	0	22	142	-50	-5	29	-50	0	69	-50	3	92	-50	-6	31	-50	-13	2	-50	1	11	-50	-6	30	-50	0	26	-50	0	20	-50	-11	22	-50	-8	38	-50
CA04587_01	CA04587_01	165	199	0	239	457	0	129	96	0	132	198	0	362	556	0	180	352	0	217	501	0	284	340	0	263	477	0	174	526	0	155	462	0	217	257	0	213	451	0
CA04589_01	CA04589_01	134	276	0	187	490	0	124	101	0	116	239	0	274	414	0	98	220	0	128	180	0	150	161	0	172	290	0	146	296	0	72	278	0	118	164	0	125	268	0
CA04591_01	CA04591_01	388	512	0	504	777	0	391	266	0	345	398	0	765	1034	0	272	504	0	327	607	0	350	539	0	376	735	0	279	797	0	174	712	0	358	494	0	356	681	0
CA04593_01	CA04593_01	415	652	0	540	950	0	415	337	0	424	558	0	885	1154	0	302	464	0	470	419	0	533	635	0	570	882	0	420	1126	0	143	803	0	551	647	0	524	830	0
CA04607_01	CA04607_01	439	589	0	568	710	0	294	209	0	335	368	0	730	1102	0	275	535	0	389	628	0	458	673	0	438	824	0	473	1050	0	209	877	0	622	731	0	518	1039	0
CA04609_01	CA04609_01	926	1469	0	1192	1020	0	664	476	0	760	944	0	1360	2149	0	560	1201	0	889	905	0	948	1150	0	858	1813	0	829	1979	0	350	1675	0	1083	1413	0	901	1815	0
CA04611_01	CA04611_01	799	1281	0	847	612	0	503	257	0	565	668	0	1180	1592	0	754	1272	0	957	836	0	904	915	0	1039	1772	0	634	1584	0	210	1207	0	491	983	0	815	1441	0
CA00609_01	CA00609_01	0	21	0	16	162	-50	-13	22	-50	-7	53	-50	-6	72	-50	-8	25	-50	-22	6	-50	-12	1	-50	-11	14	-50	-1	0	-50	3	14	-50	-12	63	-50	-11	40	-50
CA04614_01	CA04614_01	8	18	0	11	172	0	-3	27	-50	-4	56	-50	-2	78	-50	-4	35	-50	-20	14	-50	-11	2	-50	-8	26	-50	-1	25	-50	0	15	-50	-7	36	-50	-5	53	-50
CA04616_01	CA04616_01	540	535	0	496	516	0	231	169	0	211	313	0	456	722	0	178	286	0	314	214	0	325	346	0	297	552	0	242	721	0	43	456	0	272	450	0	326	595	0
CA04630_01	CA04630_01	456	495	0	305	333	0	198	185	0	172	250	0	352	661	0	157	245	0	195	123	0	237	327	0	252	444	0	264	590	0	41	351	0	256	320	0	198	412	0
CA04632_01	CA04632_01	867	2056	0	647	667	0	447	436	0	340	637	0	805	1259	0	281	917	0	505	152	0	526	688	0	577	1004	0	876	1073	0	53	727	0	740	703	0	710	948	0
CA04634_01	CA04634_01	842	1482	0	665	1247	0	442	286	0	342	517	0	711	1008	0	298	772	0	421	369	0	471	452	0	516	887	0	675	947	0	94	590	0	444	590	0	488	767	0
CA04636_01	CA04636_01	51408	49791	0	44440	13628	0	23708	8582	0	19770	17284	0	35883	47168	0	18792	44197	0	30884	21521	0	27105	29502	0	32291	52971	0	34339	47995	0	5047	36137	0	26955	31693	0	25847	41823	0
CA04638_01	CA04638_01	195	412	0	249	324	0	95	112	0	67	166	0	164	354	0	81	209	0	133	104	0	122	167	0	130	289	0	164	322	0	23	247	0	105	200	0	121	288	0
CA04640_01	CA04640_01	20	22	0	24	185	0	-3	22	-50	3	69	-50	49	100	0	-4	49	-50	-7	9	-50	-12	1	-50	0	51	-50	12	42	0	2	63	-50	0	56	-50	3	68	-50
CA04928_01	CA04928_01	365	399	0	856	846	0	444	312	0	389	598	0	798	1066	0	369	363	0	453	301	0	411	484	0	408	823	0	245	973	0	93	942	0	405	651	0	310	771	0
CA04930_01	CA04930_01	349	385	0	664	956	0	483	284	0	413	599	0	992	1259	0	392	503	0	463	660	0	433	533	0	467	1016	0	223	1024	0	196	987	0	363	570	0	353	682	0
CA04932_01	CA04932_01	26	30	0	60	216	0	-4	-52	-50	30	117	0	80	161	0	22	19	-50	28	38	-50	32	27	-50	34	77	0	-4	64	-50	15	102	-50	8	25	-50	23	80	-50
CA04934_01	CA04934_01	650	1443	0	964	468	0	708	526	0	729	1049	0	1494	2030	0	587	1289	0	780	242	0	748	1080	0	808	1911	0	938	1786	0	118	1906	0	1158	1105	0	1000	1568	0
CA04936_01	CA04936_01	255	518	0	366	626	0	202	154	0	300	398	0	446	648	0	241	403	0	265	285	0	333	454	0	321	593	0	311	669	0	100	596	0	300	390	0	245	546	0
CA04938_01	CA04938_01	319	529	0	417	430	0	312	221	0	310	462	0	409	773	0	230	399	0	339	272	0	371	545	0	390	753	0	286	758	0	104	869	0	362	487	0	405	775	0
CA04952_01	CA04952_01	55	139	0	110	340	0	49	23	-50	58	93	0	90	258	0	71	209	0	68	225	0	78	150	0	86	201	0	93	186	0	79	204	0	101	111	0	89	240	0
CA04954_01	CA04954_01	810	939	0	1164	1975	0	714	522	0	748	847	0	1558	2182	0	753	904	0	860	1570	0	910	1338	0	987	1657	0	529	1949	0	489	1860	0	1097	1241	0	841	1632	0
CA04956_01	CA04956_01	3020	3405	0	3674	2411	0	2942	1974	0	3082	3080	0	6739	8565	0	2880	4647	0	3552	4135	0	3641	7073	0	4020	7229	0	2704	8888	0	1141	9000	0	4897	5689	0	4407	8750	0
CA04958_01	CA04958_01	153	314	0	227	263	0	170	140	0	153	249	0	314	498	0	111	178	0	146	89	0	165	214	0	201	275	0	146	353	0	35	356	0	205	224	0	192	398	0
CA04960_01	CA04960_01	407	918	0	549	604	0	435	290	0	382	464	0	872	1191	0	217	566	0	338	431	0	397	703	0	428	908	0	674	1032	0	143	794	0	589	613	0	438	886	0
CA04962_01	CA04962_01	0	24	-50	30	134	-50	-5	13	-50	-3	41	-50	21	89	-50	1	29	-50	-8	13	-50	-7	-14	-50	-3	27	-50	5	33	-50	9	41	-50	12	43	-50	7	44	-50
CA04976_01	CA04976_01	2118	3259	0	2477	2109	0	1408	968	0	1690	2290	0	3451	4815	0	1250	1987	0	1967	1384	0	2033	2394	0	2036	4208	0	2186	4659	0	524	4014	0	1705	2803	0	2406	4242	0
CA04978_01	CA04978_01	5757	13046	0	6932	4665	0	3549	3098	0	4774	5312	0	9763	12451	0	3866	8418	0	6160	3134	0	6331	7482	0	6205	9406	0	8855	13054	0	1080	10649	0	7240	7664	0	6907	10666	0
CA04980_01	CA04980_01	542	925	0	632	439	0	305	212	0	377	535	0	726	1098	0	386	385	0	492	279	0	440	489	0	381	844	0	258	1050	0	65	749	0	389	605	0	441	855	0
CA04982_01	CA04982_01	240	366	0	288	268	0	171	113	0	148	219	0	356	565	0	102	228	0	186	123	0	192	285	0	214	526	0	208	626	0	41	443	0	255	408	0	246	568	0
CA04984_01	CA04984_01	178	193	0	172	185	0	84	53	0	92	152	0	216	364	0	92	118	0	116	112	0	101	141	0	118	226	0	98	300	0	39	273	0	111	246	0	144	332	0
CA04986_01	CA04986_01	127	143	0	122	159	0	56	41	0	50	107	0	119	216	0	58	100	0	64	53	0	94	89	0	89	159	0	104	210	0	16	125	0	67	128	0	93	196	0
CA05000_01	CA05000_01	815	1641	0	580	723	0	377	287	0	363	561	0	867	1073	0	316	1095	0	470	422	0	447	560	0	526	870	0	766	1003	0	97	669	0	556	615	0	526	894	0
CA05002_01	CA05002_01	514	742	0	442	630	0	277	194	0	245	381	0	538	727	0	156	350	0	267	149	0	284	327	0	323	653	0	321	584	0	43	370	0	272	391	0	293	477	0
CA00459_01	CA00459_01	1720	2350	0	1256	752	0	835	510	0	704	753	0	1480	2086	0	614	1386	0	857	615	0	854	1411	0	963	1852	0	1052	2029	0	139	1297	0	1202	1239	0	888	1515	0
CA05005_01	CA05005_01	502	891	0	416	749	0	237	168	0	188	282	0	419	667	0	180	522	0	297	477	0	235	388	0	320	603	0	339	618	0	102	380	0	291	350	0	237	421	0
CA05007_01	CA05007_01	4601	7292	0	5050	4383	0	3082	1827	0	2798	3771	0	6095	7671	0	2654	2977	0	3872	1183	0	3137	2482	0	3658	5077	0	2859	6386	0	423	4726	0	2499	3829	0	3296	5393	0
CA05009_01	CA05009_01	388	744	0	366	1142	0	276	335	0	196	385	0	458	849	0	203	470	0	303	522	0	292	492	0	316	660	0	302	750	0	80	553	0	320	492	0	289	709	0
CA05302_01	CA05302_01	218	365	0	390	358	0	333	227	0	273	435	0	529	876	0	223	456	0	256	220	0	235	335	0	268	610	0	314	820	0	100	1017	0	311	557	0	410	899	0
CA05304_01	CA05304_01	308	502	0	614	652	0	464	366	0	373	600	0	854	1156	0	466	720	0	485	562	0	416	539	0	533	932	0	381	1170	0	169	1250	0	518	677	0	640	1127	0
CA05306_01	CA05306_01	-6	24	-50	14	157	-50	-28	-53	-50	-1	41	-50	1	56	-50	-9	23	-50	-20	2	-50	-8	12	-50	-8	21	-50	-9	-6	-50	2	19	-50	-13	-5	-50	-6	29	-50
CA05308_01	CA05308_01	13	37	0	41	221	0	-10	15	-50	17	74	-50	34	120	0	14	73	0	15	105	-50	13	51	-50	22	65	0	27	54	-50	35	106	-50	28	42	-50	22	99	0
CA05310_01	CA05310_01	1105	3418	0	1501	1429	0	1117	1023	0	1116	1706	0	2117	2808	0	962	2926	0	1064	671	0	1231	2245	0	1346	2641	0	2223	2826	0	284	2936	0	1839	1749	0	1264	2470	0
CA05312_01	CA05312_01	9	47	-50	35	175	-50	3	4	-50	12	66	-50	10	113	0	-1	37	-50	1	25	-50	6	43	-50	9	58	-50	9	33	-50	7	67	-50	25	36	-50	6	57	-50
CA05325_01	CA05325_01	96	159	0	184	251	0	75	62	0	85	151	0	129	285	0	118	133	0	134	147	0	157	283	0	129	256	0	92	384	0	44	250	0	117	147	0	96	234	0
CA05327_01	CA05327_01	255	283	0	406	454	0	304	162	0	242	326	0	488	1092	0	367	448	0	352	586	0	821	586	0	452	1248	0	429	1783	0	292	1695	0	518	624	0	378	751	0
CA05329_01	CA05329_01	24	43	0	57	184	-50	25	31	-50	47	90	0	63	181	0	31	67	-50	34	58	-50	35	67	-50	50	122	0	33	135	-50	25	153	-50	38	111	-50	68	168	0
CA05331_01	CA05331_01	560	588	0	685	780	0	534	403	0	472	627	0	1027	1380	0	450	624	0	597	1025	0	580	881	0	671	1075	0	273	1441	0	273	1210	0	711	849	0	588	1181	0
CA05333_01	CA05333_01	480	857	0	576	387	0	485	227	0	445	524	0	990	1364	0	324	573	0	413	302	0	454	640	0	437	996	0	468	1149	0	115	1108	0	521	695	0	540	1092	0
CA05335_01	CA05335_01	301	472	0	383	669	0	274	163	0	331	500	0	678	943	0	173	294	0	294	204	0	326	250	0	356	486	0	334	682	0	77	598	0	227	460	0	383	651	0
CA05348_01	CA05348_01	399	569	0	513	472	0	341	209	0	347	585	0	703	1016	0	384	441	0	564	219	0	473	409	0	625	825	0	335	947	0	81	903	0	363	647	0	497	893	0
CA05350_01	CA05350_01	1131	2341	0	1487	1109	0	788	638	0	937	1096	0	2038	2962	0	758	2003	0	1137	1366	0	1261	1994	0	1276	2384	0	1757	2551	0	386	2058	0	1579	1737	0	1346	2361	0
CA05352_01	CA05352_01	-13	18	-50	13	127	-50	-12	13	-50	-11	34	-50	-11	39	-50	-10	14	-50	-25	6	-50	-19	-26	-50	-7	9	-50	-8	-13	-50	-2	-7	-50	8	73	-50	-8	32	-50
CA05354_01	CA05354_01	2802	4091	0	3061	1739	0	1590	1101	0	1884	1861	0	2924	4555	0	2053	3589	0	2934	3345	0	2563	4557	0	2700	4317	0	2448	6613	0	613	5103	0	2805	4116	0	2762	5283	0
CA05356_01	CA05356_01	44	195	0	64	299	0	17	75	0	10	57	0	69	174	0	21	170	0	31	65	-50	34	127	0	50	80	0	158	175	0	22	55	-50	119	53	0	39	106	0
CA05358_01	CA05358_01	696	1252	0	639	901	0	380	232	0	316	435	0	726	1115	0	372	841	0	516	518	0	525	472	0	577	895	0	768	1315	0	163	993	0	598	815	0	704	1265	0
CA05370_01	CA05370_01	215	280	0	183	175	0	95	65	0	77	184	0	183	313	0	72	145	0	111	35	-50	132	122	0	147	275	0	140	360	0	15	221	0	113	232	0	150	344	0
CA05372_01	CA05372_01	1323	1888	0	1010	1007	0	583	455	0	479	727	0	925	1503	0	442	1077	0	654	604	0	649	872	0	696	1353	0	760	1390	0	129	872	0	671	822	0	635	1087	0
CA00626_01	CA00626_01	3	6	-50	18	88	-50	8	13	-50	-8	26	-50	2	65	-50	-11	14	-50	-18	-5	-50	-16	-27	-50	-11	14	-50	-8	-18	-50	-3	0	-50	-20	15	-50	-3	17	-50
CA05375_01	CA05375_01	254	228	0	201	357	0	98	85	0	76	146	0	172	303	0	86	188	0	102	264	0	103	170	0	109	246	0	103	249	0	69	212	0	123	208	0	121	252	0
CA05377_01	CA05377_01	5	22	-50	27	108	-50	-4	5	-50	-3	29	-50	-3	60	-50	-5	22	-50	-8	15	-50	-4	-3	-50	1	32	-50	5	31	-50	6	32	-50	-9	36	-50	4	40	-50
CA05379_01	CA05379_01	1384	1027	0	1044	1325	0	690	553	0	497	656	0	1024	1594	0	967	897	0	1176	1221	0	1039	1406	0	1058	1595	0	508	2121	0	266	1428	0	897	1213	0	900	1918	0
CA05667_01	CA05667_01	2659	1334	0	7788	3210	0	4480	2698	0	2781	3597	0	8665	10354	0	5752	3782	0	7839	6053	0	7457	8281	0	6213	9401	0	1965	15291	0	1744	14714	0	7106	9892	0	7740	13439	0
CA05669_01	CA05669_01	77	215	0	260	515	-50	120	120	-50	120	317	0	268	483	0	98	332	0	104	527	0	110	303	0	127	348	0	146	324	0	165	386	0	166	211	0	127	354	0
CA05671_01	CA05671_01	141	180	0	237	805	0	232	117	0	182	303	0	480	631	0	156	222	0	164	492	0	169	276	0	205	385	0	101	391	0	230	466	0	232	276	0	223	523	0
CA05673_01	CA05673_01	-7	11	-50	13	229	0	-31	-17	-50	-5	74	-50	-5	123	-50	-10	29	-50	-9	10	-50	-7	4	-50	-5	12	-50	-5	-12	-50	6	40	-50	-3	-3	-50	-7	13	-50
CA05675_01	CA05675_01	629	924	0	809	1389	0	634	485	0	626	817	0	1074	1480	0	603	1159	0	604	1086	0	624	1088	0	709	1431	0	556	1560	0	340	1529	0	850	927	0	698	1443	0
CA05677_01	CA05677_01	3250	4168	0	3715	1142	0	2785	1210	0	2790	3708	0	3589	5786	0	2315	4012	0	3292	2121	0	3299	3211	0	3604	7192	0	2611	7827	0	826	8088	0	2523	4204	0	4250	7783	0
CA05690_01	CA05690_01	1288	2129	0	1617	2626	0	1148	842	0	1241	1562	0	1714	2774	0	1019	1749	0	1203	1176	0	1329	1456	0	1455	2000	0	1747	2868	0	431	3092	0	1196	1875	0	1630	3242	0
CA05692_01	CA05692_01	427	668	0	502	386	0	448	461	0	453	627	0	774	1250	0	290	450	0	359	186	0	371	643	0	425	721	0	402	990	0	112	1206	0	602	752	0	658	1279	0
CA05694_01	CA05694_01	99	190	0	155	271	0	107	62	0	99	177	0	271	430	0	80	220	0	91	227	0	92	108	0	114	287	0	137	261	0	110	491	0	105	195	0	156	348	0
CA05696_01	CA05696_01	71	149	0	124	241	0	97	57	0	70	151	0	210	363	0	69	137	0	78	123	0	74	108	0	91	222	0	72	238	0	49	265	0	70	204	0	75	263	0
CA05698_01	CA05698_01	124	199	0	171	304	0	156	72	0	125	200	0	294	468	0	100	147	0	133	164	0	139	137	0	158	324	0	94	339	0	72	386	0	157	261	0	211	439	0
CA05700_01	CA05700_01	34	77	0	63	167	0	23	40	-50	44	108	0	91	200	0	26	88	0	22	103	0	19	50	-50	34	104	0	32	81	-50	52	126	0	50	73	0	68	208	0
CA05712_01	CA05712_01	8094	1333	0	7773	3214	0	6499	1858	0	7035	8140	0	14250	16241	0	7260	1313	0	7247	3251	0	7643	4140	0	7540	13383	0	883	17799	0	1168	17175	0	4191	13748	0	13804	19540	0
CA05714_01	CA05714_01	45	93	0	80	258	0	73	103	0	34	123	0	208	400	0	93	129	0	106	193	0	125	243	0	135	243	0	108	482	0	104	311	0	229	278	0	207	519	0
CA05716_01	CA05716_01	396	577	0	451	396	0	340	277	0	363	414	0	791	1213	0	301	644	0	330	334	0	329	562	0	352	784	0	318	863	0	148	952	0	514	743	0	642	1163	0
CA05718_01	CA05718_01	24	43	0	46	226	0	49	57	0	2	63	-50	83	202	0	20	50	0	14	76	-50	27	21	-50	27	78	0	38	78	-50	65	80	-50	59	101	0	53	158	0
CA05720_01	CA05720_01	1	22	-50	17	116	-50	-1	19	-50	-10	46	-50	2	77	-50	-5	28	-50	-17	-3	-50	-9	-12	-50	-1	35	-50	15	12	-50	2	6	-50	-10	22	-50	2	41	-50
CA05722_01	CA05722_01	308	429	0	299	251	0	158	209	0	124	167	0	242	507	0	169	412	0	205	206	0	187	542	0	182	361	0	193	569	0	67	579	0	573	455	0	256	656	0
CA05735_01	CA05735_01	551	668	0	450	901	0	304	244	0	325	374	0	595	837	0	259	617	0	353	794	0	342	537	0	410	675	0	438	845	0	198	575	0	436	557	0	416	750	0
CA05737_01	CA05737_01	1215	1303	0	901	736	0	782	417	0	607	633	0	1217	1939	0	530	1113	0	798	1037	0	758	1124	0	811	1606	0	887	2235	0	244	1456	0	1107	1372	0	1150	1969	0
CA05739_01	CA05739_01	127	312	0	104	359	0	77	89	0	54	136	0	184	261	0	51	190	0	80	94	0	64	81	-50	86	175	0	141	200	0	32	159	0	119	144	0	92	181	0
CA05740_01	CA05740_01	398	384	0	355	438	0	249	145	0	207	273	0	386	627	0	249	380	0	272	493	0	264	324	0	318	623	0	200	619	0	122	487	0	353	476	0	343	676	0
CA05742_01	CA05742_01	237	377	0	327	579	0	222	158	0	162	304	0	406	529	0	155	232	0	197	120	0	194	136	0	212	315	0	153	393	0	36	311	0	133	281	0	220	405	0
CA05744_01	CA05744_01	1909	3250	0	2162	4067	0	1744	981	0	1374	1549	0	2795	3629	0	1453	2559	0	1812	3358	0	1792	2040	0	2045	3215	0	1681	3603	0	917	2419	0	1805	2315	0	2095	3529	0
CA06031_01	CA06031_01	211	328	0	338	736	0	373	289	0	276	487	0	588	844	0	218	359	0	231	278	0	229	352	0	247	482	0	231	628	0	85	633	0	312	449	0	299	589	0
CA06033_01	CA06033_01	566	200	0	1134	3411	0	869	328	0	678	861	0	1329	2098	0	703	241	0	792	1856	0	770	388	0	817	1143	0	164	1551	0	583	1400	0	332	1023	0	466	1143	0
CA06035_01	CA06035_01	-6	15	-50	22	125	-50	-27	-78	-50	6	64	-50	13	93	-50	-11	18	-50	-14	-2	-50	-8	13	-50	-7	27	-50	-5	-28	-50	2	22	-50	-6	11	-50	-6	35	-50
CA06037_01	CA06037_01	-10	9	-50	18	166	-50	-30	39	-50	0	47	-50	1	73	-50	-15	24	-50	-14	0	-50	-14	-6	-50	-9	16	-50	-14	-38	-50	-3	15	-50	-19	-6	-50	-10	7	-50
CA06039_01	CA06039_01	334	277	0	535	573	0	369	218	0	425	390	0	615	967	0	383	303	0	409	510	0	382	644	0	467	735	0	210	1240	0	208	1266	0	475	711	0	488	1217	0
CA06041_01	CA06041_01	94	120	0	144	267	0	94	70	0	96	187	0	153	305	0	79	127	0	97	83	0	76	134	0	117	272	0	54	323	0	26	367	0	119	207	0	132	339	0
CA06054_01	CA06054_01	46	145	0	336	2644	0	54	55	-50	74	168	0	116	252	0	46	105	0	50	30	-50	64	63	-50	71	142	0	88	245	0	20	217	0	67	152	0	105	233	0
CA06056_01	CA06056_01	333	687	0	453	541	0	298	290	0	300	429	0	625	940	0	213	549	0	262	492	0	332	666	0	334	707	0	404	811	0	172	842	0	407	502	0	350	873	0
CA06058_01	CA06058_01	52	104	0	73	150	-50	44	23	-50	47	118	0	96	212	0	36	84	0	30	52	-50	34	24	-50	37	157	0	42	147	0	15	148	0	19	103	-50	55	170	0
CA06060_01	CA06060_01	434	712	0	488	419	0	351	190	0	294	404	0	592	955	0	297	621	0	363	382	0	351	484	0	372	886	0	405	1030	0	127	982	0	341	618	0	426	1030	0
CA06062_01	CA06062_01	376	371	0	401	354	0	275	81	0	221	284	0	523	700	0	184	203	0	272	187	0	299	212	0	272	515	0	253	747	0	79	508	0	178	443	0	316	637	0
CA06064_01	CA06064_01	-3	9	-50	9	108	-50	-20	3	-50	-11	29	-50	-1	49	-50	-9	17	-50	-23	-8	-50	-20	-19	-50	-9	2	-50	-6	-15	-50	4	-9	-50	-25	2	-50	-17	19	-50
CA06078_01	CA06078_01	158	165	0	195	325	0	108	106	0	132	195	0	257	404	0	127	182	0	171	381	0	155	253	0	186	357	0	94	469	0	101	427	0	257	326	0	211	506	0
CA06079_01	CA06079_01	87	93	0	164	211	0	59	42	-50	72	129	0	196	299	0	44	57	0	90	137	0	78	124	0	102	173	0	33	226	0	36	179	0	81	181	0	123	288	0
CA06081_01	CA06081_01	1	62	-50	35	188	0	12	26	-50	1	64	-50	36	104	-50	7	34	-50	14	22	-50	21	5	-50	25	52	-50	39	36	-50	10	49	-50	10	50	-50	22	72	-50
CA06083_01	CA06083_01	144	283	0	205	377	0	153	109	0	85	185	0	248	458	0	105	220	0	127	231	0	131	159	0	153	305	0	153	398	0	59	296	0	158	266	0	152	340	0
CA06085_01	CA06085_01	109	314	0	141	225	0	83	98	0	65	153	0	186	296	0	61	217	0	69	48	0	70	142	0	94	198	0	143	250	0	21	175	0	138	178	0	99	208	0
CA06087_01	CA06087_01	672	635	0	706	658	0	298	216	0	305	352	0	578	884	0	246	533	0	331	598	0	326	550	0	315	797	0	238	922	0	134	684	0	405	595	0	339	846	0
CA06101_01	CA06101_01	1635	4224	0	1539	1796	0	744	761	0	841	1231	0	1596	2040	0	671	2301	0	965	669	0	1026	1343	0	1001	1677	0	1709	1801	0	156	1283	0	1186	1150	0	839	1345	0
CA06103_01	CA06103_01	-6	17	-50	7	126	-50	-10	9	-50	-17	32	-50	-18	57	-50	-14	22	-50	-23	-2	-50	-20	-17	-50	-13	18	-50	-9	-14	-50	-3	37	-50	-20	16	-50	-11	24	-50
CA06105_01	CA06105_01	959	1005	0	632	800	0	418	434	0	382	601	0	894	1095	0	452	675	0	552	719	0	546	1028	0	584	1035	0	337	1215	0	137	787	0	720	715	0	503	1044	0
CA06107_01	CA06107_01	59	58	0	75	361	0	25	37	-50	26	65	0	71	137	0	29	42	-50	26	181	0	40	54	-50	53	96	0	18	112	-50	21	106	0	47	88	-50	60	137	0
CA06109_01	CA06109_01	707	1069	0	747	1345	0	487	285	0	356	538	0	944	1156	0	427	757	0	495	621	0	498	519	0	527	863	0	548	1024	0	155	646	0	483	652	0	569	894	0
CA06111_01	CA06111_01	771	1344	0	658	478	0	410	288	0	304	410	0	582	958	0	310	879	0	409	234	0	406	479	0	425	709	0	564	1110	0	48	616	0	467	570	0	472	818	0
CA10180_01	adherence factor	587	221	0	1499	287	-50	1058	424	0	574	953	0	1473	2224	0	876	439	0	923	257	0	889	685	0	825	1747	0	221	2348	0	124	2314	0	656	1427	0	1108	2102	0
CA10105_01	stress seventy A subfamily cell wall protein	6745	8922	0	15738	5062	-50	9382	4869	0	8584	9387	0	16956	23494	0	7643	8890	0	8234	3467	0	7727	7920	0	7257	12925	0	6804	19396	0	1810	22529	0	9161	12795	0	9456	21059	0
CA10077_01	extracellular lipase	-18	15	-50	4	138	-50	-63	-93	-50	-10	39	-50	-15	59	-50	-15	17	-50	-19	-3	-50	-20	-10	-50	-11	7	-50	-15	-30	-50	-3	-7	-50	-27	-8	-50	-16	7	-50
CA10098_01	ribosomal protein S7	28665	51399	0	47622	25179	0	32707	16475	0	36736	43750	0	51899	51264	0	23950	42506	0	32588	16262	0	30041	30675	0	30060	53323	0	42395	59727	0	7873	64472	0	32929	46507	0	37442	58499	0
CA10104_01	Cyb1	1877	2931	0	2793	1477	0	2331	1400	0	1996	2703	0	3823	7183	0	3389	4461	0	2638	2399	0	7578	4952	0	3508	11084	0	4182	13194	0	1559	14934	0	4819	5619	0	4098	8436	0
CA10122_01	Rsr1p	511	903	0	682	585	0	512	254	0	555	774	0	848	1339	0	364	643	0	525	371	0	486	595	0	595	1146	0	714	1458	0	172	1578	0	620	1010	0	846	1681	0
CA10278_01	squalene epoxidase	648	1455	0	752	1230	0	642	367	0	741	1001	0	941	1494	0	433	998	0	542	653	0	575	789	0	652	1282	0	808	1320	0	261	1583	0	625	904	0	743	1425	0
CA10099_01	PEP carboxykinase	3	25	0	44	791	0	9	44	-50	16	83	0	58	133	0	4	38	-50	-2	605	0	10	80	-50	13	76	-50	17	49	-50	287	44	0	80	42	-50	12	67	-50
CA10097_01	ornithine decarboxylase	3158	8371	0	3736	4267	0	3068	2264	0	3294	4920	0	7291	8486	0	1778	4923	0	2423	1457	0	2911	3318	0	3310	4957	0	5429	6742	0	679	6449	0	3384	4551	0	4119	6966	0
CA10096_01	prolyl-tRNA synthetase	103	161	0	149	198	0	135	104	0	102	185	0	253	403	0	76	143	0	77	89	0	93	181	0	94	216	0	85	292	0	33	274	0	148	210	0	123	327	0
CA10129_01	CLA4 protein kinase homolog	17847	16572	0	15897	5842	0	14868	6996	0	12307	15119	0	22665	44985	0	22171	28791	0	20055	14352	0	44193	26682	0	23569	58462	0	30693	60968	0	6793	61771	0	32739	38208	0	26607	49378	0
CA10020_01	CDC2-related protein kinase CRK1	91	89	0	130	264	0	71	74	0	28	89	0	139	320	0	36	128	0	64	152	0	94	169	0	65	219	0	96	246	0	45	222	0	101	186	0	65	219	0
CA10164_01	G1 cyclin	988	1743	0	1097	840	0	652	861	0	661	797	0	1905	2409	0	680	1532	0	808	830	0	775	2538	0	766	1629	0	870	2100	0	245	1581	0	1860	1254	0	1024	1903	0
CA10160_01	heat shock protein 90	18459	37673	0	23480	22468	0	14560	10480	0	15778	18524	0	28176	41108	0	9220	28084	0	15295	22193	0	14247	17855	0	14418	25296	0	22509	30869	0	8101	26571	0	19336	21737	0	15689	29943	0
CA10145_01	alcohol dehydrogenase	6597	4204	0	8055	1350	0	5489	2292	0	4292	6077	0	16128	15180	0	6345	4711	0	8906	5377	0	9451	8404	0	9528	16129	0	4523	19746	0	901	15616	0	8140	13366	0	11185	16484	0
CA10076_01	ATP phosphoribosyltransferase	24644	36639	0	30530	1972	0	24626	409	0	20344	9563	0	15534	57560	0	14698	21908	0	22173	792	0	22873	518	0	24234	9985	0	26947	41943	0	321	40437	0	2112	38471	0	831	46989	0
CA10217_01	not specified	47	68	0	73	229	0	110	148	0	18	57	-50	84	180	0	72	93	0	72	91	0	70	238	0	70	151	0	73	286	0	52	190	0	702	169	0	139	407	0
CA10118_01	neutral trehalase	455	495	0	384	809	0	253	173	0	158	277	0	506	617	0	158	289	0	276	403	0	293	362	0	322	551	0	342	753	0	136	593	0	374	556	0	361	837	0
CA00295_01	Candida albicans 3-deoxy-D-arabinoheptulosonate-7-phosphate	3259	7287	0	2589	4181	0	1971	1492	0	1673	2287	0	3248	4582	0	1635	5462	0	2071	3941	0	2102	2966	0	2142	4136	0	3665	4102	0	1162	3205	0	2666	3081	0	2025	3713	0
CA00378_01	Candida albicans carboxypeptidase Y (CPY1) gene, complete cds.	1600	2154	0	1164	1465	0	1155	701	0	1083	1355	0	2237	2811	0	894	1499	0	1273	1111	0	1286	1568	0	1246	2431	0	1319	3361	0	359	2686	0	1482	2210	0	1648	3136	0
CA00379_01	Candida albicans (clone lambda-C1.d) enolase mRNA, complete cds.	24716	31103	0	16435	12292	0	14318	9979	0	13856	21100	0	30855	32197	0	14022	26166	0	20115	7830	0	19567	18479	0	20615	23264	0	23576	35796	0	1725	28329	0	17634	25171	0	22234	30264	0
CA00383_01	Candida albicans DNA for Rbf1, complete cds.	327	750	0	280	635	0	235	171	0	207	367	0	416	634	0	147	403	0	191	192	0	197	187	0	252	449	0	345	470	0	41	290	0	188	323	0	250	388	0
CA00444_01	C.albicans beta-tubulin gene, complete cds.	9403	15875	0	9693	11015	0	5990	3823	0	4995	6306	0	10522	13611	0	4625	11887	0	6042	6305	0	6408	7234	0	6623	10773	0	8921	10648	0	1539	8221	0	6980	8165	0	6897	11012	0
CA10171_01	elongation factor 3	31185	29487	0	29014	7232	0	18170	8963	0	16940	13767	0	26045	36084	0	12920	25539	0	15074	14283	0	16285	27543	0	14152	37071	0	15541	45240	0	3774	31820	0	28318	31824	0	21022	41784	0
CA01245_01	CA01245_01	438	935	0	413	519	0	603	472	0	568	751	0	1095	1459	0	273	739	0	307	297	0	328	559	0	287	666	0	379	718	0	97	807	0	486	574	0	398	844	0
CA02108_01	CA02108_01	2810	5686	0	4399	2551	0	4551	2928	0	3924	4289	0	7591	10272	0	2131	5280	0	1970	1552	0	2319	3934	0	2283	5591	0	3714	7192	0	714	8031	0	4678	5539	0	3649	8057	0
CA02349_01	CA02349_01	600	1029	0	764	598	0	761	812	0	584	1012	0	1158	1788	0	347	866	0	415	288	0	433	802	0	401	932	0	438	1027	0	112	1241	0	634	763	0	429	1015	0
CA03035_01	CA03035_01	472	1612	0	699	682	0	690	440	0	707	986	0	1424	1938	0	297	914	0	347	277	0	384	621	0	391	1106	0	794	1168	0	160	1343	0	660	833	0	634	1267	0
CA04053_01	CA04053_01	-10	16	-50	16	174	-50	-12	-41	-50	-5	49	-50	1	62	-50	-11	26	-50	-5	12	-50	-9	6	-50	-6	17	-50	-2	-10	-50	-1	13	-50	-12	-15	-50	-11	11	-50
CA04302_01	CA04302_01	452	993	0	631	747	0	570	534	0	564	782	0	1061	1468	0	237	630	0	359	366	0	400	856	0	425	932	0	490	961	0	140	1055	0	686	623	0	531	1110	0
CA01245_01	CA01245_01	474	1386	0	746	598	0	517	457	0	549	715	0	1034	1397	0	221	670	0	293	327	0	348	625	0	376	830	0	478	967	0	121	970	0	582	649	0	434	985	0
CA02108_01	CA02108_01	3228	6757	0	3780	2256	0	4456	2661	0	4280	4413	0	7281	10071	0	1791	4911	0	2468	1823	0	2895	4502	0	3059	7080	0	4652	9146	0	835	9694	0	6050	7268	0	4342	9178	0
CA02349_01	CA02349_01	682	1147	0	831	558	0	618	643	0	553	931	0	1181	1676	0	299	823	0	412	281	0	526	887	0	408	918	0	423	1053	0	100	1177	0	605	722	0	504	1200	0
CA03035_01	CA03035_01	575	1778	0	684	713	0	769	451	0	594	789	0	1394	2011	0	266	805	0	358	286	0	441	636	0	346	970	0	835	1296	0	131	1061	0	741	912	0	616	1278	0
CA04053_01	CA04053_01	174	297	0	197	271	0	209	118	0	147	211	0	290	532	0	119	324	0	140	175	0	229	270	0	110	292	0	151	320	0	68	364	0	202	283	0	203	514	0
CA04302_01	CA04302_01	726	1271	0	678	736	0	677	648	0	574	738	0	1261	1779	0	285	646	0	415	348	0	429	867	0	385	832	0	542	1136	0	124	958	0	806	776	0	552	1145	0
CA01245_01	CA01245_01	764	1679	0	753	645	0	556	492	0	507	676	0	1233	1811	0	227	688	0	344	321	0	390	686	0	369	820	0	514	1044	0	110	876	0	728	837	0	516	1140	0
CA02108_01	CA02108_01	4518	9277	0	4742	2520	0	4284	3022	0	3578	3869	0	8333	12144	0	1609	4713	0	3087	2107	0	3228	5024	0	3237	7663	0	5243	10088	0	806	8813	0	6944	7811	0	4510	9183	0
CA02349_01	CA02349_01	857	1424	0	907	553	0	627	736	0	516	817	0	1053	1660	0	313	843	0	438	296	0	408	772	0	474	1064	0	470	1112	0	86	1071	0	769	879	0	554	1226	0
CA03035_01	CA03035_01	699	2062	0	733	748	0	682	473	0	535	681	0	1314	1937	0	233	790	0	395	326	0	427	641	0	467	1195	0	799	1283	0	138	1165	0	937	1040	0	588	1161	0
CA04053_01	CA04053_01	-8	21	-50	12	126	-50	-9	4	-50	-15	27	-50	-1	58	-50	-7	35	-50	-17	-3	-50	-15	-12	-50	-8	16	-50	2	0	-50	1	14	-50	-14	10	-50	-5	23	-50
CA04302_01	CA04302_01	903	1380	0	686	755	0	599	645	0	458	623	0	1029	1555	0	256	659	0	378	338	0	389	763	0	426	879	0	529	967	0	135	990	0	920	789	0	543	1131	0
CA01245_01	CA01245_01	821	1804	0	617	584	0	576	478	0	483	639	0	952	1373	0	249	707	0	344	336	0	379	628	0	373	794	0	568	1011	0	115	935	0	784	822	0	494	1061	0
CA02108_01	CA02108_01	4932	9497	0	4226	2664	0	3998	2707	0	3949	4189	0	6265	9446	0	1847	4925	0	3079	2051	0	2955	4410	0	3365	7453	0	4391	9168	0	688	7642	0	7469	7895	0	3869	7844	0
CA02349_01	CA02349_01	1107	1573	0	817	557	0	657	744	0	487	837	0	761	1286	0	294	786	0	388	305	0	423	824	0	440	1030	0	521	1417	0	86	992	0	827	916	0	555	1095	0
CA03035_01	CA03035_01	956	2299	0	660	637	0	727	431	0	573	767	0	1078	1603	0	235	799	0	375	319	0	437	610	0	411	1100	0	957	1419	0	127	1129	0	928	1104	0	696	1291	0
CA04053_01	CA04053_01	-9	19	-50	8	94	-50	-9	14	-50	-12	43	-50	-18	33	-50	-10	23	-50	-18	8	-50	-14	-13	-50	-7	20	-50	0	-19	-50	1	30	-50	47	56	-50	-6	18	-50
CA04302_01	CA04302_01	805	1337	0	650	740	0	593	593	0	479	565	0	845	1296	0	258	657	0	344	309	0	358	770	0	379	790	0	558	1091	0	98	842	0	1013	792	0	527	999	0
CA10037_01	transfer RNA ligase	380	844	0	457	652	0	166	208	0	113	213	0	0	598	0	169	477	0	296	337	0	337	441	0	297	666	0	363	619	0	46	251	0	212	274	0	173	359	0
CA10181_01	acid proteinase-related protein	6012	9154	0	9766	10037	0	6377	3178	0	3828	4065	0	0	10963	0	4072	8784	0	6331	8866	0	6671	7922	0	6712	11032	0	5553	9610	0	2778	8784	0	6649	6690	0	6771	10648	0
CA10182_01	secreted aspartyl proteinase 3	22	39	0	34	325	0	6	72	0	-2	73	0	0	160	0	11	128	0	-3	132	0	5	68	-50	5	99	0	23	131	0	14	205	0	-3	233	0	-5	319	0
CA10030_01	argininosuccinate lyase	71	117	0	105	825	0	26	111	0	12	148	0	0	231	0	42	122	0	47	194	0	50	53	0	51	241	0	48	156	0	14	95	0	15	97	-50	66	122	0
CA10036_01	hexosaminidase precursor	183	239	0	255	971	0	64	108	0	55	120	0	0	296	0	108	221	0	147	622	0	175	209	0	193	318	0	101	262	0	77	138	0	40	132	0	58	171	0
CA10130_01	profilin	3410	4436	0	3845	4781	0	1408	781	0	1321	1586	0	0	3732	0	2499	2526	0	2518	1402	0	2963	1825	0	3443	3581	0	1718	3336	0	235	1558	0	946	1485	0	1621	2224	0
CA10033_01	cell division cycle protein	368	560	0	408	565	0	148	150	0	85	184	0	0	436	0	237	464	0	266	337	0	311	338	0	291	504	0	227	476	0	47	252	0	121	234	0	152	307	0
CA10014_01	phosphomannomutase	4302	5824	0	5834	4637	0	1887	810	0	1575	1840	0	0	5191	0	3030	3483	0	3867	2446	0	4392	2670	0	4169	5630	0	2908	5788	0	457	2716	0	1496	2553	0	2396	3212	0
CA00683_01	CA00683_01	103	164	0	135	628	0	45	101	0	80	157	0	0	295	0	76	143	0	99	197	0	159	178	0	120	200	0	75	259	0	42	164	0	49	129	0	70	195	0
CA00685_01	CA00685_01	2	32	0	20	193	0	0	48	-50	14	85	0	0	126	0	7	53	-50	-10	32	-50	11	25	-50	-4	47	-50	12	53	-50	4	63	-50	-2	66	-50	-1	60	-50
CA00687_01	CA00687_01	175	355	0	200	372	0	34	100	0	57	153	0	0	270	0	68	216	0	94	188	0	132	228	0	102	253	0	119	222	0	17	92	0	45	109	0	34	107	0
CA00689_01	CA00689_01	8382	9906	0	7687	2784	0	3714	1823	0	2197	1624	0	0	7840	0	6347	9831	0	7487	6097	0	7723	9167	0	7921	11420	0	5829	13823	0	1045	6126	0	6451	6380	0	5306	8243	0
CA00703_01	CA00703_01	1180	1591	0	1380	804	0	321	204	0	402	443	0	0	1065	0	515	783	0	840	635	0	925	1028	0	991	1461	0	483	1312	0	58	561	0	341	504	0	323	635	0
CA00705_01	CA00705_01	54	74	0	66	532	0	15	118	0	19	114	0	0	185	0	46	60	0	30	42	-50	46	31	-50	60	130	0	7	110	-50	6	57	-50	-1	89	-50	27	89	-50
CA11001_01	CA11001_01	1247	2768	0	1602	1474	0	230	219	0	438	460	0	0	997	0	554	1663	0	811	640	0	1111	1497	0	988	1442	0	1166	1418	0	81	547	0	440	437	0	476	743	0
CA00707_01	CA00707_01	197	322	0	288	415	0	34	176	0	56	182	0	0	273	0	167	310	0	216	96	0	353	110	0	299	650	0	185	518	0	22	207	0	211	210	0	110	293	0
CA00709_01	CA00709_01	194	224	0	195	261	0	33	89	0	51	136	0	0	245	0	67	140	0	66	62	0	111	136	0	76	173	0	81	222	0	12	111	-50	46	283	0	47	252	0
CA00711_01	CA00711_01	1628	1465	0	1574	1116	0	255	202	0	372	383	0	0	1020	0	663	1068	0	922	1344	0	914	994	0	832	1230	0	680	1212	0	113	493	0	281	370	0	377	673	0
CA00462_01	CA00462_01	3	23	-50	16	163	-50	-2	53	-50	3	61	-50	0	93	-50	5	49	-50	-13	17	-50	-13	13	-50	1	35	-50	2	46	-50	4	20	-50	-6	55	-50	-3	49	-50
CA00723_01	CA00723_01	605	914	0	543	420	0	97	103	0	145	206	0	0	484	0	346	443	0	224	128	0	361	428	0	294	474	0	338	542	0	22	221	0	166	214	0	166	323	0
CA11006_01	CA11006_01	1240	1682	0	1236	692	0	186	158	0	269	330	0	0	874	0	335	787	0	388	362	0	557	821	0	482	889	0	619	838	0	41	297	0	275	342	0	265	488	0
CA00463_01	CA00463_01	1264	933	0	1300	3753	0	212	207	0	284	392	0	0	701	0	486	725	0	471	1720	0	770	916	0	706	948	0	485	808	0	198	297	0	237	307	0	331	573	0
CA00727_01	CA00727_01	595	1214	0	560	498	0	100	178	0	147	273	0	0	388	0	270	762	0	249	111	0	423	483	0	424	630	0	493	545	0	27	210	0	181	199	0	250	398	0
CA00729_01	CA00729_01	760	868	0	828	1970	0	97	128	0	249	378	0	0	513	0	472	596	0	285	560	0	576	713	0	484	782	0	414	769	0	91	328	0	131	296	0	262	472	0
CA01004_01	CA01004_01	206	489	0	281	342	0	82	111	0	71	151	0	0	334	0	118	319	0	145	167	0	153	300	0	171	421	0	212	394	0	24	233	0	169	226	0	135	289	0
CA01006_01	CA01006_01	4	32	0	21	301	0	-3	78	-50	-1	129	0	0	158	0	1	181	0	-13	231	0	-11	301	0	-3	396	0	16	532	0	7	570	0	-9	465	0	-4	555	0
CA01008_01	CA01008_01	6	28	0	18	225	0	1	77	0	2	86	0	0	96	-50	1	55	-50	-15	27	-50	-10	8	-50	-11	27	-50	5	35	-50	2	33	-50	-7	54	-50	-4	43	-50
CA00450_01	CA00450_01	154	192	0	185	355	0	47	88	0	39	126	0	0	275	0	93	172	0	99	191	0	101	100	0	106	198	0	83	179	0	11	95	-50	19	84	-50	40	132	0
CA01011_01	CA01011_01	1422	1747	0	1453	1601	0	382	286	0	355	478	0	0	1140	0	564	1050	0	747	1159	0	778	839	0	938	1603	0	634	1087	0	144	518	0	285	426	0	377	691	0
CA01013_01	CA01013_01	-4	34	-50	34	179	-50	11	91	-50	-2	83	-50	0	134	0	-2	56	-50	-22	21	-50	-22	5	-50	-10	31	-50	1	31	-50	0	27	-50	-18	36	-50	-10	45	-50
CA01027_01	CA01027_01	6671	9313	0	8316	8922	0	2252	1767	0	2283	2458	0	0	6354	0	4095	7885	0	5745	6332	0	6079	6525	0	6901	8973	0	4003	6812	0	745	3046	0	2439	2563	0	3192	4673	0
CA01029_01	CA01029_01	15	43	0	60	255	-50	16	76	-50	3	90	-50	0	209	0	39	75	-50	7	47	-50	51	44	-50	23	110	0	10	130	-50	11	94	-50	22	90	-50	23	97	-50
CA01031_01	CA01031_01	1456	2523	0	1867	870	0	458	297	0	480	591	0	0	1509	0	864	1342	0	959	318	0	1244	963	0	1326	1999	0	1177	1815	0	64	749	0	474	675	0	548	904	0
CA01033_01	CA01033_01	853	794	0	948	1093	0	171	294	0	252	456	0	0	649	0	434	401	0	523	349	0	504	877	0	657	782	0	277	577	0	41	327	0	335	272	0	178	327	0
CA01035_01	CA01035_01	202	272	0	198	399	0	45	107	0	67	162	0	0	264	0	132	207	0	138	150	0	145	208	0	182	256	0	122	257	0	10	146	0	72	160	0	82	188	0
CA01037_01	CA01037_01	51	119	0	66	294	0	2	63	-50	7	102	0	0	163	0	19	89	-50	7	38	-50	15	37	-50	19	74	-50	25	64	-50	4	39	-50	-10	49	-50	5	78	-50
CA01051_01	CA01051_01	2465	4319	0	3261	2457	0	711	401	0	795	853	0	0	2103	0	1257	2223	0	1566	1404	0	1675	1719	0	1986	3185	0	1392	2306	0	241	1114	0	792	960	0	782	1349	0
CA01053_01	CA01053_01	407	1246	0	552	1075	0	96	183	0	133	269	0	0	498	0	197	629	0	278	260	0	355	534	0	391	567	0	502	451	0	26	133	0	198	193	0	137	232	0
CA01055_01	CA01055_01	137	264	0	204	341	0	53	72	0	51	136	0	0	235	0	138	180	0	118	109	0	130	121	0	129	247	0	99	261	0	14	131	0	56	133	0	56	171	0
CA01057_01	CA01057_01	289	266	0	450	615	0	100	116	0	116	183	0	0	369	0	236	274	0	202	455	0	275	384	0	268	505	0	122	421	0	49	185	0	102	196	0	128	301	0
CA01059_01	CA01059_01	229	403	0	286	736	0	61	108	0	96	191	0	0	271	0	136	228	0	131	234	0	159	183	0	156	244	0	139	234	0	24	111	0	43	111	0	82	200	0
CA01061_01	CA01061_01	121	129	0	152	574	0	32	101	0	59	137	0	0	223	0	71	131	0	64	334	0	64	132	0	77	141	0	36	183	0	102	72	0	52	91	0	38	120	0
CA01074_01	CA01074_01	605	588	0	644	416	0	137	139	0	154	223	0	0	479	0	371	425	0	349	290	0	372	507	0	400	616	0	184	584	0	47	323	0	161	253	0	207	469	0
CA01076_01	CA01076_01	1060	1710	0	1167	766	0	213	212	0	231	314	0	0	754	0	383	1163	0	437	237	0	640	937	0	526	1051	0	635	1030	0	32	392	0	271	303	0	355	640	0
CA01078_01	CA01078_01	753	1056	0	1042	1244	0	176	188	0	232	310	0	0	662	0	523	1046	0	393	822	0	568	959	0	601	964	0	525	833	0	105	279	0	274	284	0	262	506	0
CA01080_01	CA01080_01	566	1150	0	701	486	0	135	167	0	202	291	0	0	392	0	288	608	0	204	94	0	344	440	0	397	633	0	429	528	0	10	139	-50	159	159	0	213	383	0
CA01082_01	CA01082_01	51811	61398	0	55207	22903	0	11023	5157	0	18209	17236	0	0	24033	0	27974	40788	0	25782	9341	0	33750	20585	0	32238	41999	0	28479	30875	0	1689	16374	0	9310	11873	0	18572	27811	0
CA01084_01	CA01084_01	915	1272	0	893	778	0	193	188	0	329	457	0	0	497	0	367	669	0	267	235	0	513	567	0	520	808	0	422	704	0	35	254	0	194	249	0	264	474	0
CA01367_01	CA01367_01	0	32	0	21	222	0	4	57	-50	-2	58	-50	0	82	0	0	47	-50	-15	24	-50	-6	5	-50	-8	38	-50	11	33	-50	3	36	-50	-5	46	-50	-7	54	-50
CA01369_01	CA01369_01	-1	39	0	33	362	0	-2	70	-50	-7	82	-50	0	127	0	0	77	-50	-12	45	-50	1	32	-50	-6	54	-50	21	45	-50	2	80	-50	-13	64	-50	-6	102	0
CA01371_01	CA01371_01	909	1173	0	819	435	0	210	144	0	217	284	0	0	749	0	276	495	0	381	156	0	510	419	0	537	923	0	393	818	0	23	408	0	188	392	0	285	507	0
CA01373_01	CA01373_01	0	31	0	16	215	-50	-8	58	-50	-5	75	-50	0	114	0	-1	61	-50	-19	24	-50	-19	19	-50	-14	43	-50	0	28	-50	-3	27	-50	-22	50	-50	-12	58	-50
CA01375_01	CA01375_01	1009	1276	0	975	1634	0	293	297	0	235	354	0	0	786	0	402	825	0	546	857	0	534	769	0	715	1063	0	401	720	0	100	422	0	326	391	0	289	547	0
CA01376_01	CA01376_01	937	722	0	905	405	0	217	210	0	193	283	0	0	677	0	447	556	0	492	181	0	463	605	0	512	980	0	213	915	0	28	523	0	354	444	0	238	560	0
CA01389_01	CA01389_01	723	1015	0	685	1347	0	194	187	0	194	332	0	0	700	0	297	747	0	364	650	0	370	469	0	467	744	0	381	511	0	87	310	0	204	283	0	260	411	0
CA01391_01	CA01391_01	502	1004	0	793	768	0	175	247	0	40	138	0	0	588	0	295	785	0	348	189	0	389	558	0	376	648	0	409	458	0	25	332	0	245	278	0	286	504	0
CA01393_01	CA01393_01	222	229	0	207	267	0	34	64	0	54	148	0	0	288	0	107	162	0	121	97	0	122	147	0	141	285	0	75	278	0	9	165	0	32	150	0	57	174	0
CA01395_01	CA01395_01	4248	6060	0	3795	1887	0	1048	684	0	1001	1114	0	0	4829	0	2897	4164	0	2275	1165	0	3925	2941	0	3305	6279	0	3258	4532	0	263	2311	0	1372	1515	0	1176	1902	0
CA01397_01	CA01397_01	2149	2533	0	2217	2411	0	609	386	0	612	737	0	0	1625	0	1049	1724	0	1219	1881	0	1141	1095	0	1492	2366	0	925	1895	0	231	736	0	630	695	0	575	1046	0
CA01399_01	CA01399_01	31	52	0	45	263	0	-4	43	-50	3	87	0	0	117	0	7	40	-50	-22	9	-50	-10	11	-50	-9	39	-50	4	13	-50	-2	31	-50	-20	40	-50	-7	47	-50
CA01413_01	CA01413_01	123	112	0	159	341	0	18	59	0	35	105	0	0	183	0	63	106	0	50	134	0	67	99	0	76	166	0	24	154	-50	16	70	-50	8	88	-50	32	122	0
CA01415_01	CA01415_01	828	2084	0	1081	567	0	219	173	0	301	325	0	0	783	0	585	1355	0	494	318	0	637	904	0	687	1174	0	682	892	0	65	501	0	356	394	0	313	539	0
CA01417_01	CA01417_01	176	436	0	276	415	0	111	136	0	132	221	0	0	274	0	231	436	0	212	224	0	246	271	0	223	409	0	241	395	0	71	333	0	210	308	0	191	351	0
CA01419_01	CA01419_01	10	35	0	32	253	0	-2	55	0	4	66	-50	0	99	0	4	55	-50	-14	49	-50	-13	18	-50	0	34	-50	7	39	-50	4	42	-50	-3	36	-50	-2	49	-50
CA01421_01	CA01421_01	2	28	-50	18	197	-50	-11	47	-50	-5	94	0	0	110	0	2	69	-50	-17	53	-50	-16	20	-50	-8	47	-50	-3	53	-50	-1	51	-50	-16	42	-50	-10	39	-50
CA01423_01	CA01423_01	156	163	0	192	265	0	26	56	-50	46	138	0	0	228	0	82	160	0	75	109	0	93	181	0	108	224	0	53	178	0	10	58	-50	59	68	0	52	172	0
CA01437_01	CA01437_01	142	196	0	178	395	0	4	51	-50	17	101	0	0	222	0	63	120	0	33	30	0	71	63	0	93	189	0	48	103	0	5	33	-50	2	74	-50	22	94	0
CA01439_01	CA01439_01	-5	23	-50	10	165	-50	-8	48	-50	-6	60	-50	0	72	-50	33	50	-50	-28	19	-50	-33	-10	-50	-8	32	-50	-10	0	-50	-3	-5	-50	-24	26	-50	-15	28	-50
CA01441_01	CA01441_01	905	648	0	1139	340	0	194	131	0	290	262	0	0	692	0	483	531	0	366	287	0	516	803	0	514	1199	0	229	1051	0	37	430	0	289	372	0	347	725	0
CA01443_01	CA01443_01	724	555	0	859	870	0	166	140	0	243	365	0	0	517	0	506	393	0	456	577	0	520	504	0	618	799	0	177	633	0	61	332	0	134	240	0	267	481	0
CA01445_01	CA01445_01	14	61	-50	35	237	-50	-2	42	-50	-6	74	-50	0	94	-50	11	75	-50	-18	28	-50	-31	-19	-50	-2	38	-50	8	1	-50	-2	-42	-50	-21	36	-50	-13	49	-50
CA01447_01	CA01447_01	62120	14091	0	46593	7935	0	6820	2870	0	16335	16173	0	0	15613	0	22922	8329	0	13430	4879	0	30382	13958	0	27251	32854	0	5717	36717	0	704	11787	0	8739	13184	0	16654	23886	0
CA01735_01	CA01735_01	2213	3302	0	2852	2430	0	1481	1037	0	809	835	0	0	3745	0	1097	1941	0	1553	1289	0	1659	2045	0	1760	2824	0	2377	4235	0	589	2829	0	2440	2350	0	1837	3197	0
CA01737_01	CA01737_01	5	34	0	25	187	-50	6	71	-50	-6	70	-50	0	129	0	7	60	-50	-3	47	-50	3	47	-50	10	58	-50	15	77	-50	9	108	-50	-2	68	-50	7	95	-50
CA01739_01	CA01739_01	96	167	0	129	447	0	34	99	0	35	131	0	0	203	0	50	135	0	40	105	0	50	59	-50	325	125	0	49	124	-50	13	91	-50	11	109	0	33	122	0
CA01741_01	CA01741_01	430	520	0	502	500	0	148	123	0	114	205	0	0	463	0	223	394	0	255	305	0	260	305	0	313	525	0	143	416	0	27	193	0	119	223	0	150	323	0
CA01743_01	CA01743_01	22313	36408	0	24474	13008	0	7207	4033	0	7647	6787	0	0	17772	0	9809	26820	0	14534	11505	0	12936	16140	0	16515	24901	0	18854	17607	0	1983	9549	0	8832	7886	0	8190	12781	0
CA01745_01	CA01745_01	327	275	0	262	566	0	66	96	0	95	195	0	0	358	0	128	164	0	155	151	0	153	104	-50	246	338	0	86	285	0	19	122	-50	21	111	-50	75	180	0
CA01759_01	CA01759_01	1126	1126	0	963	1133	0	313	264	0	326	367	0	0	914	0	511	840	0	559	833	0	597	710	0	757	1063	0	484	984	0	126	522	0	383	461	0	340	661	0
CA01761_01	CA01761_01	38	82	0	55	319	0	5	64	-50	8	91	0	0	117	-50	10	70	-50	0	79	-50	10	30	-50	10	78	-50	18	56	-50	10	51	-50	-1	55	-50	5	74	-50
CA01763_01	CA01763_01	7	26	0	18	158	-50	-13	36	-50	-6	69	-50	0	107	0	2	43	-50	-19	20	-50	-16	17	-50	-6	44	-50	-4	46	-50	2	36	-50	-15	48	-50	-10	36	-50
CA01765_01	CA01765_01	3	29	0	21	201	-50	2	131	-50	-9	67	-50	0	110	0	0	42	-50	-17	28	-50	-21	3	-50	-2	55	-50	-3	37	-50	1	33	-50	-20	43	-50	-2	56	0
CA01767_01	CA01767_01	8	33	0	29	244	0	-11	57	-50	-7	81	-50	0	109	0	4	50	-50	-24	16	-50	-12	28	-50	-12	43	-50	-3	22	-50	1	42	-50	-22	49	-50	-1	47	-50
CA01769_01	CA01769_01	980	1439	0	892	622	0	190	176	0	228	310	0	0	588	0	348	626	0	491	257	0	543	737	0	558	932	0	457	745	0	26	317	0	266	269	0	242	443	0
CA01783_01	CA01783_01	1250	1085	0	1138	997	0	315	207	0	366	489	0	0	916	0	511	657	0	579	378	0	618	554	0	743	1271	0	351	925	0	44	459	0	242	435	0	304	596	0
CA01785_01	CA01785_01	1590	3440	0	1777	2064	0	488	381	0	570	722	0	0	1581	0	773	1655	0	681	501	0	999	1018	0	1144	1781	0	1437	1720	0	97	684	0	584	663	0	590	953	0
CA01787_01	CA01787_01	1879	3967	0	2286	1396	0	613	489	0	658	1013	0	0	1859	0	1353	2374	0	1453	833	0	1609	1415	0	1978	2671	0	1441	2342	0	78	919	0	754	950	0	754	1212	0
CA01789_01	CA01789_01	2	24	0	21	171	-50	-12	41	-50	-4	64	-50	0	130	0	-4	54	-50	-22	13	-50	-24	-3	-50	-12	26	-50	-9	6	-50	-2	52	-50	-23	44	-50	-8	41	-50
CA01791_01	CA01791_01	916	1016	0	787	1212	0	198	192	0	195	324	0	0	657	0	402	538	0	312	425	0	492	465	0	528	681	0	339	656	0	48	247	0	142	255	0	197	385	0
CA01793_01	CA01793_01	741	825	0	748	1269	0	175	166	0	192	284	0	0	617	0	275	582	0	317	562	0	415	385	0	460	657	0	428	598	0	73	248	0	121	231	0	227	423	0
CA01807_01	CA01807_01	1205	696	0	1163	643	0	270	210	0	302	302	0	0	912	0	557	501	0	430	482	0	676	805	0	746	1319	0	215	1171	0	70	497	0	372	508	0	402	859	0
CA01809_01	CA01809_01	549	680	0	645	669	0	83	101	0	112	204	0	0	453	0	290	430	0	188	352	0	368	372	0	485	708	0	352	478	0	34	84	0	101	200	0	179	340	0
CA01811_01	CA01811_01	83	105	0	88	197	-50	4	102	0	12	105	0	0	144	0	48	114	0	22	45	-50	36	230	0	50	133	0	18	105	-50	4	41	-50	154	67	0	14	108	-50
CA01813_01	CA01813_01	986	712	0	1036	1079	0	229	174	0	315	445	0	0	749	0	552	424	0	492	356	0	581	351	0	765	1010	0	250	749	0	49	275	0	117	299	0	347	622	0
CA01815_01	CA01815_01	2381	1620	0	2147	2377	0	547	350	0	814	700	0	0	1256	0	1391	1613	0	1111	1591	0	1341	1440	0	1793	2428	0	635	1869	0	226	728	0	468	694	0	871	1575	0
CA01817_01	CA01817_01	-9	33	-50	25	211	-50	-1	60	-50	1	79	-50	0	88	-50	20	63	-50	-28	18	-50	-11	14	-50	-4	53	-50	-8	13	-50	7	39	-50	-18	51	-50	-10	59	-50
CA02106_01	CA02106_01	493	708	0	651	1465	0	247	285	0	164	291	0	0	789	0	229	399	0	395	842	0	396	574	0	394	680	0	278	711	0	107	383	0	248	359	0	216	418	0
CA02108_01	CA02108_01	4832	9919	0	6781	3289	0	3212	1893	0	2283	2242	0	0	7926	0	2132	4957	0	3354	2128	0	3361	4743	0	3881	7369	0	4518	7047	0	473	5032	0	4332	4502	0	3195	5847	0
CA02110_01	CA02110_01	1722	3288	0	2467	1362	0	787	400	0	643	724	0	0	2139	0	1091	2007	0	1298	1101	0	1294	1585	0	1600	2998	0	1272	2432	0	172	1352	0	923	1217	0	975	1810	0
CA02112_01	CA02112_01	291	646	0	359	444	0	79	90	0	68	182	0	0	363	0	130	292	0	203	151	0	185	163	0	238	452	0	169	337	0	8	129	-50	58	114	0	83	225	0
CA02114_01	CA02114_01	3071	2026	0	3540	5053	0	990	496	0	852	806	0	0	2827	0	1370	1582	0	1977	2895	0	2002	1907	0	2441	3058	0	1032	2847	0	532	1736	0	874	1595	0	1026	1942	0
CA02116_01	CA02116_01	439	393	0	379	378	0	123	109	0	90	198	0	0	422	0	233	327	0	239	222	0	272	203	0	317	605	0	162	556	0	39	335	0	92	248	0	144	374	0
CA02129_01	CA02129_01	1226	1959	0	1084	797	0	320	278	0	320	428	0	0	1080	0	476	1538	0	629	335	0	680	935	0	957	1758	0	970	1446	0	78	800	0	554	647	0	530	950	0
CA02131_01	CA02131_01	1289	2309	0	1117	732	0	325	221	0	338	512	0	0	1035	0	423	832	0	607	255	0	658	609	0	828	1239	0	824	1077	0	49	623	0	366	507	0	440	790	0
CA02133_01	CA02133_01	275	140	0	291	279	0	40	93	0	53	134	0	0	286	0	24	60	-50	28	37	-50	39	107	-50	45	357	0	18	136	-50	8	74	-50	87	71	0	30	93	-50
CA02135_01	CA02135_01	1912	3395	0	2084	1381	0	392	650	0	454	653	0	0	1468	0	638	1634	0	856	466	0	1015	2131	0	1531	2451	0	1279	1766	0	67	655	0	811	590	0	506	878	0
CA02137_01	CA02137_01	37	119	0	50	431	0	3	126	0	-1	184	0	0	246	0	14	136	0	-9	90	-50	-2	102	-50	14	151	0	26	159	0	4	191	0	-1	142	-50	11	203	0
CA02139_01	CA02139_01	13	61	0	17	459	0	-15	111	0	-6	138	0	0	205	0	-4	62	0	-17	84	-50	-13	60	-50	-11	78	-50	-7	73	-50	-2	73	-50	-24	53	-50	-9	44	-50
CA02152_01	CA02152_01	711	961	0	579	787	0	253	230	0	228	368	0	0	613	0	436	753	0	404	352	0	373	445	0	505	855	0	380	690	0	57	409	0	266	395	0	287	535	0
CA00510_01	CA00510_01	211	237	0	210	227	0	38	75	0	51	130	0	0	227	0	96	137	0	38	62	-50	109	155	0	133	262	0	77	206	0	7	84	-50	45	114	-50	61	166	0
CA02155_01	CA02155_01	391	356	0	372	433	0	104	92	0	115	225	0	0	420	0	170	197	0	106	136	0	244	168	0	239	430	0	137	405	0	25	230	0	55	140	0	122	224	0
CA02157_01	CA02157_01	4737	5621	0	4961	2241	0	1405	728	0	1430	1448	0	0	3631	0	1904	3425	0	2251	1651	0	2736	3688	0	3409	5735	0	2757	5016	0	107	1550	0	1648	2003	0	1816	3425	0
CA00453_01	CA00453_01	38	60	0	37	167	-50	-12	37	-50	-4	49	-50	0	96	-50	18	63	-50	-12	16	-50	-7	33	-50	0	45	-50	4	10	-50	-9	-11	-50	-9	55	-50	-5	58	-50
CA02159_01	CA02159_01	570	326	0	584	905	0	141	155	0	144	277	0	0	463	0	234	202	0	281	455	0	354	291	0	395	472	0	89	380	0	35	64	0	59	133	0	146	250	0
CA02172_01	CA02172_01	0	25	-50	15	189	-50	-13	50	-50	-6	53	-50	0	80	-50	2	41	-50	-24	22	-50	-22	-2	-50	-17	27	-50	-7	-2	-50	-1	-12	-50	-26	40	-50	-16	27	-50
CA02174_01	CA02174_01	3265	5739	0	3431	1594	0	1095	678	0	984	1257	0	0	2478	0	2393	4307	0	2289	1027	0	2663	2247	0	3035	4568	0	3085	3833	0	250	1667	0	1958	1642	0	2111	3510	0
CA02176_01	CA02176_01	-1	22	-50	21	190	-50	-6	41	-50	-1	55	-50	0	88	-50	-1	38	-50	-31	13	-50	-16	2	-50	-19	23	-50	-15	5	-50	-5	-54	-50	-16	45	-50	-11	47	-50
CA00513_01	CA00513_01	129	150	0	143	296	0	31	82	0	35	115	0	0	201	0	71	127	0	29	49	0	44	89	0	75	171	0	51	144	0	6	87	0	14	109	0	49	186	0
CA02179_01	CA02179_01	77	89	0	81	184	-50	0	31	-50	7	59	-50	0	142	0	41	91	0	-5	15	-50	14	33	-50	32	90	0	15	62	-50	3	-23	-50	-2	59	-50	2	67	-50
CA02181_01	CA02181_01	65390	65354	0	61754	55211	0	25065	11647	0	26273	31093	0	0	45736	0	33175	54400	0	33074	20138	0	39016	27549	0	49855	56499	0	44743	43486	0	3103	23423	0	15773	19106	0	33379	43617	0
CA02464_01	CA02464_01	172	225	0	239	458	0	74	127	0	53	171	0	0	351	0	83	173	0	103	235	0	128	168	0	163	315	0	80	320	0	25	217	0	58	185	0	87	242	0
CA02466_01	CA02466_01	-3	60	0	33	413	0	0	110	0	-3	117	0	0	193	0	2	98	0	-17	56	-50	-6	51	-50	-7	60	-50	5	79	-50	3	84	-50	-24	57	-50	-6	96	-50
CA02468_01	CA02468_01	0	24	0	17	275	0	-9	63	-50	-9	78	-50	0	141	0	-4	61	-50	-18	47	-50	-8	40	-50	-12	49	-50	-3	54	-50	0	85	-50	-17	62	-50	-9	63	-50
CA02470_01	CA02470_01	654	992	0	722	1375	0	264	264	0	227	312	0	0	707	0	355	724	0	443	471	0	384	532	0	537	723	0	361	683	0	49	324	0	242	347	0	263	500	0
CA02472_01	CA02472_01	475	604	0	476	665	0	151	206	0	124	214	0	0	466	0	244	409	0	274	281	0	260	530	0	397	618	0	197	522	0	51	290	0	248	294	0	229	478	0
CA02474_01	CA02474_01	115	263	0	161	353	0	39	91	0	22	113	0	0	218	0	54	164	0	51	58	-50	56	68	-50	91	196	0	89	137	0	4	76	-50	18	80	-50	46	134	0
CA00528_01	CA00528_01	99	60	0	61	339	0	91	115	0	46	105	0	0	221	0	52	107	0	37	71	-50	48	64	-50	75	118	0	49	133	-50	127	156	0	145	128	0	65	140	0
CA02488_01	CA02488_01	1000	763	0	830	1146	0	400	378	0	242	329	0	0	855	0	413	502	0	611	663	0	704	754	0	749	956	0	426	1016	0	158	614	0	838	658	0	512	792	0
CA02490_01	CA02490_01	2	30	0	11	183	-50	-9	38	-50	-5	57	-50	0	84	-50	-9	38	-50	-18	15	-50	-16	19	-50	-10	26	-50	-3	15	-50	4	32	-50	-23	35	-50	-11	32	-50
CA02492_01	CA02492_01	477	387	0	499	700	0	105	122	0	105	216	0	0	419	0	162	228	0	214	132	0	283	264	0	316	524	0	132	367	0	24	191	0	83	172	0	147	267	0
CA02494_01	CA02494_01	616	614	0	556	1260	0	139	158	0	136	283	0	0	485	0	244	423	0	258	501	0	312	349	0	369	547	0	191	438	0	59	225	0	133	191	0	196	381	0
CA02495_01	CA02495_01	779	879	0	706	1749	0	199	227	0	211	337	0	0	729	0	329	614	0	365	653	0	428	448	0	475	723	0	354	502	0	75	288	0	162	268	0	256	458	0
CA02508_01	CA02508_01	75	44	0	80	410	0	8	46	-50	6	67	-50	0	146	0	35	44	-50	9	234	0	21	34	-50	41	105	-50	1	54	-50	29	53	-50	-20	61	-50	15	84	-50
CA02510_01	CA02510_01	1660	3130	0	1811	1430	0	387	452	0	423	564	0	0	1396	0	589	1929	0	741	432	0	840	1388	0	1165	2051	0	1174	1418	0	84	893	0	708	628	0	683	1069	0
CA02512_01	CA02512_01	829	1014	0	977	1614	0	188	231	0	211	374	0	0	806	0	338	598	0	384	599	0	555	813	0	603	869	0	494	806	0	83	392	0	286	316	0	223	433	0
CA02514_01	CA02514_01	3	55	0	27	211	-50	-9	37	-50	-5	68	-50	0	81	-50	6	44	-50	-21	31	-50	-14	22	-50	-6	57	-50	-4	17	-50	0	32	-50	-23	46	-50	-5	45	-50
CA02516_01	CA02516_01	37	59	0	39	241	0	41	91	0	30	84	0	0	153	0	19	57	0	-6	35	-50	12	23	-50	27	95	0	11	87	-50	39	56	-50	44	82	-50	10	73	0
CA02518_01	CA02518_01	510	654	0	473	428	0	122	149	0	109	244	0	0	454	0	212	456	0	208	212	0	263	323	0	325	608	0	199	446	0	23	235	0	121	233	0	169	365	0
CA02532_01	CA02532_01	660	725	0	623	1281	0	200	222	0	178	313	0	0	603	0	406	530	0	330	556	0	388	525	0	537	792	0	269	633	0	85	281	0	202	287	0	235	452	0
CA02534_01	CA02534_01	388	909	0	386	598	0	104	134	0	108	208	0	0	369	0	183	517	0	121	222	0	182	287	0	208	428	0	289	304	0	39	86	0	112	157	0	144	303	0
CA02536_01	CA02536_01	841	528	0	744	591	0	215	176	0	252	376	0	0	731	0	431	393	0	452	292	0	556	480	0	643	984	0	198	826	0	45	401	0	187	378	0	432	818	0
CA02538_01	CA02538_01	637	1077	0	651	591	0	128	143	0	148	242	0	0	544	0	439	719	0	204	137	0	321	424	0	355	621	0	388	489	0	18	156	0	163	219	0	240	478	0
CA02540_01	CA02540_01	106	61	0	144	495	0	17	56	-50	16	86	0	0	163	0	136	101	0	43	194	0	81	152	0	120	143	0	18	137	-50	21	18	-50	93	97	0	45	149	0
CA02542_01	CA02542_01	3573	2138	0	3541	3206	0	755	462	0	1019	1008	0	0	1956	0	1532	1552	0	1316	1638	0	1701	1524	0	2082	2800	0	736	2529	0	111	934	0	694	1069	0	1087	2218	0
CA02828_01	CA02828_01	324	447	0	475	652	0	189	235	0	122	320	0	0	662	0	165	230	0	244	185	0	281	338	0	303	530	0	158	548	0	26	355	0	155	369	0	186	404	0
CA00542_01	CA00542_01	-10	29	0	22	279	0	-8	58	-50	-7	81	-50	0	136	0	-7	55	-50	-16	45	-50	-14	20	-50	-16	37	-50	-1	45	-50	1	74	-50	-14	68	-50	-6	65	-50
CA02831_01	CA02831_01	4252	7744	0	4145	2727	0	1395	1028	0	1342	1483	0	0	3741	0	1856	5641	0	2161	1932	0	2252	3567	0	2981	5324	0	3258	4077	0	289	2402	0	2243	2157	0	1673	2858	0
CA02833_01	CA02833_01	-9	20	-50	11	206	-50	-14	39	-50	-13	59	-50	0	78	-50	-4	51	-50	-17	26	-50	-17	8	-50	-19	17	-50	-4	13	-50	-6	30	-50	-29	41	-50	-13	44	-50
CA02835_01	CA02835_01	1313	1759	0	1393	2145	0	447	414	0	356	537	0	0	1069	0	616	1055	0	746	982	0	740	947	0	843	1180	0	520	1052	0	107	553	0	402	515	0	490	748	0
CA02837_01	CA02837_01	1584	2073	0	1387	1064	0	503	344	0	470	570	0	0	1207	0	630	1471	0	921	855	0	913	1139	0	1098	1709	0	861	1386	0	128	793	0	561	641	0	576	890	0
CA02851_01	CA02851_01	246	278	0	270	451	0	64	119	0	57	161	0	0	310	0	76	219	0	94	110	0	113	196	0	130	275	0	77	199	0	16	162	0	62	130	0	75	193	0
CA02853_01	CA02853_01	4	24	0	17	195	-50	-12	48	-50	-9	62	-50	0	83	0	-9	46	-50	-22	21	-50	2	43	-50	-12	20	-50	-5	17	-50	1	36	-50	-16	46	-50	-1	51	-50
CA02855_01	CA02855_01	1080	1557	0	969	1644	0	317	261	0	301	476	0	0	975	0	435	832	0	512	443	0	646	545	0	713	922	0	639	809	0	62	428	0	256	362	0	394	569	0
CA02857_01	CA02857_01	1	23	-50	11	162	-50	-11	29	-50	-10	47	-50	0	67	-50	-7	32	-50	-20	14	-50	-21	0	-50	-14	29	-50	-13	-2	-50	0	25	-50	-25	23	-50	-16	38	-50
CA02859_01	CA02859_01	362	618	0	332	580	0	121	130	0	118	232	0	0	355	0	131	306	0	183	159	0	211	169	0	247	366	0	235	266	0	28	166	0	95	201	0	152	239	0
CA02861_01	CA02861_01	506	564	0	416	636	0	129	125	0	133	264	0	0	385	0	166	277	0	226	97	0	297	197	0	322	498	0	216	481	0	22	232	0	89	242	0	204	322	0
CA02874_01	CA02874_01	1165	1263	0	1089	837	0	333	215	0	344	426	0	0	919	0	573	865	0	553	481	0	663	615	0	779	1455	0	505	1024	0	67	579	0	329	536	0	415	749	0
CA02876_01	CA02876_01	3068	2857	0	3021	3457	0	751	322	0	872	1535	0	0	2065	0	1389	1531	0	1199	1007	0	1823	858	0	2108	3003	0	1094	2525	0	156	1102	0	314	936	0	1015	1393	0
CA02878_01	CA02878_01	1166	1559	0	1167	2086	0	367	314	0	385	553	0	0	957	0	546	1014	0	428	756	0	691	740	0	917	1225	0	747	962	0	178	650	0	334	459	0	386	627	0
CA02880_01	CA02880_01	1262	2541	0	1114	1015	0	384	411	0	452	647	0	0	1018	0	605	1384	0	448	271	0	661	882	0	821	1532	0	849	1123	0	37	580	0	560	583	0	560	912	0
CA00454_01	CA00454_01	4	24	0	28	201	0	-3	46	-50	-10	45	-50	0	69	-50	1	43	-50	-19	28	-50	-8	33	-50	-6	47	-50	-3	41	-50	-2	14	-50	-15	46	-50	-5	49	-50
CA02883_01	CA02883_01	490	656	0	466	594	0	134	141	0	145	265	0	0	447	0	210	409	0	237	194	0	223	272	0	305	542	0	292	435	0	31	189	0	133	247	0	190	349	0
CA02897_01	CA02897_01	10	30	0	24	140	-50	-8	33	-50	-1	53	-50	0	77	-50	5	52	-50	-19	12	-50	-2	22	-50	-9	32	-50	17	50	-50	0	-1	-50	-10	23	-50	-14	27	-50
CA02899_01	CA02899_01	1535	2711	0	1320	803	0	448	323	0	430	570	0	0	1132	0	714	1714	0	661	402	0	739	938	0	945	1708	0	1082	1220	0	62	700	0	465	537	0	703	1129	0
CA02901_01	CA02901_01	4	25	-50	25	185	-50	-5	44	-50	-3	66	-50	0	103	0	16	58	-50	-22	25	-50	-8	36	-50	-11	53	-50	-5	19	-50	-1	15	-50	2	61	-50	-6	59	-50
CA02903_01	CA02903_01	6	24	0	18	145	-50	-5	32	-50	-1	53	-50	0	70	-50	2	32	-50	-18	20	-50	-16	1	-50	-4	40	-50	-3	18	-50	1	6	-50	-6	49	-50	-4	36	-50
CA02905_01	CA02905_01	338	420	0	371	513	0	88	94	0	104	196	0	0	278	0	354	334	0	118	106	0	186	214	0	252	346	0	197	291	0	31	138	0	69	141	0	164	317	0
CA02907_01	CA02907_01	1206	1864	0	1279	631	0	351	280	0	390	510	0	0	826	0	321	604	0	307	84	0	422	627	0	540	917	0	341	731	0	15	328	0	383	691	0	378	743	0
CA03187_01	CA03187_01	1748	3965	0	2789	2808	0	1124	787	0	778	978	0	0	2931	0	1095	2391	0	1573	2007	0	1640	2400	0	1959	3124	0	1699	2668	0	541	1886	0	1561	1448	0	1277	1912	0
CA03189_01	CA03189_01	22	109	0	36	373	0	4	85	-50	1	112	0	0	182	0	5	98	-50	4	58	-50	5	99	-50	8	84	-50	27	87	-50	-2	90	-50	26	106	-50	8	113	-50
CA03191_01	CA03191_01	8	28	0	31	229	0	-12	41	-50	-10	59	-50	0	103	0	8	50	-50	-8	33	-50	2	10	-50	-4	53	-50	23	31	-50	-2	48	-50	-17	53	-50	-4	50	-50
CA03193_01	CA03193_01	435	590	0	609	701	0	104	144	0	138	194	0	0	440	0	152	388	0	180	279	0	186	271	0	232	415	0	182	264	0	30	180	0	191	146	0	191	223	0
CA03195_01	CA03195_01	1	26	-50	39	212	-50	-6	48	-50	5	50	0	0	103	-50	7	51	-50	-11	24	-50	-7	-1	-50	2	37	-50	4	28	-50	4	45	-50	-9	34	-50	-3	45	-50
CA03197_01	CA03197_01	-2	29	0	23	178	-50	-10	41	-50	-11	37	-50	0	103	0	2	69	-50	-13	32	-50	-11	13	-50	-4	33	-50	10	19	-50	-1	36	-50	-19	23	-50	-7	41	-50
CA03211_01	CA03211_01	106	173	0	117	321	0	18	57	-50	26	68	0	0	156	0	47	190	0	47	66	-50	29	65	0	67	129	0	51	122	-50	8	77	-50	20	77	-50	42	99	0
CA03213_01	CA03213_01	870	859	0	859	1235	0	267	200	0	233	358	0	0	856	0	368	564	0	401	549	0	459	495	0	518	886	0	316	664	0	77	380	0	255	407	0	296	565	0
CA03215_01	CA03215_01	1598	1333	0	1911	1673	0	353	231	0	351	387	0	0	1393	0	758	1322	0	929	1307	0	1054	1152	0	788	2183	0	595	1052	0	156	650	0	410	600	0	633	984	0
CA03217_01	CA03217_01	-1	20	-50	18	183	-50	-15	35	-50	-10	63	-50	0	94	-50	-1	49	-50	-6	29	-50	-13	14	-50	-2	45	-50	6	27	-50	3	62	-50	-8	40	-50	1	49	-50
CA03219_01	CA03219_01	1	28	-50	21	187	0	-10	42	-50	-8	63	-50	0	68	-50	-6	34	-50	-13	30	-50	-29	-7	-50	-12	35	-50	-6	11	-50	1	35	-50	-22	39	-50	-9	20	-50
CA03221_01	CA03221_01	42	67	0	64	578	0	16	73	0	9	132	0	0	152	0	26	99	0	17	243	0	25	75	-50	30	131	0	6	83	-50	17	105	0	2	84	-50	28	105	-50
CA03234_01	CA03234_01	96	80	0	88	268	0	15	47	-50	19	60	-50	0	121	0	32	65	0	29	193	0	31	90	-50	55	118	0	24	277	-50	20	72	-50	22	63	-50	34	94	0
CA03236_01	CA03236_01	660	1135	0	754	1015	0	163	205	0	211	380	0	0	611	0	226	564	0	235	239	0	360	412	0	440	652	0	391	540	0	28	268	0	205	282	0	260	439	0
CA03238_01	CA03238_01	-3	25	-50	20	170	-50	-9	38	-50	-6	52	-50	0	73	-50	4	34	-50	-36	3	-50	-10	29	-50	-9	34	-50	-3	-3	-50	-4	13	-50	-21	47	-50	-10	43	-50
CA03240_01	CA03240_01	945	750	0	1188	936	0	192	218	0	247	447	0	0	1012	0	398	438	0	377	246	0	558	516	0	706	976	0	242	725	0	26	345	0	255	370	0	428	752	0
CA03242_01	CA03242_01	512	522	0	735	713	0	121	139	0	121	259	0	0	639	0	298	384	0	212	441	0	388	605	0	454	816	0	215	692	0	61	363	0	243	362	0	266	577	0
CA03244_01	CA03244_01	263	308	0	277	343	0	65	103	0	66	142	0	0	262	0	97	189	0	55	78	0	118	246	0	159	330	0	98	247	0	12	90	-50	75	110	-50	82	189	0
CA03258_01	CA03258_01	2073	1270	0	1814	2889	0	569	346	0	626	769	0	0	1443	0	1084	993	0	963	1534	0	1127	1022	0	1472	1950	0	563	1707	0	272	870	0	560	798	0	855	1352	0
CA03260_01	CA03260_01	8	34	0	34	177	-50	2	41	-50	3	62	-50	0	92	-50	4	42	-50	-11	30	-50	-2	38	-50	-2	39	-50	3	25	-50	0	1	-50	-8	42	-50	-5	48	-50
CA03262_01	CA03262_01	547	326	0	543	396	0	132	104	0	139	244	0	0	479	0	261	212	0	207	200	0	337	248	0	374	573	0	93	425	0	26	210	0	80	220	0	226	468	0
CA03264_01	CA03264_01	632	895	0	581	1275	0	145	154	0	162	263	0	0	509	0	287	884	0	239	690	0	296	418	0	408	636	0	308	394	0	112	225	0	186	247	0	231	420	0
CA03266_01	CA03266_01	1408	2376	0	1544	509	0	317	215	0	373	395	0	0	917	0	569	1532	0	494	223	0	681	765	0	788	1518	0	764	1036	0	45	662	0	451	443	0	628	1125	0
CA03268_01	CA03268_01	13	25	0	40	172	-50	12	42	-50	7	93	0	0	86	-50	19	48	-50	-15	20	-50	-8	-2	-50	5	47	-50	-2	12	-50	9	45	-50	21	80	-50	4	61	-50
CA03554_01	CA03554_01	1263	2096	0	1532	829	0	610	546	0	463	707	0	0	1599	0	720	1513	0	995	503	0	811	1286	0	1033	1741	0	886	1701	0	72	1049	0	873	981	0	718	1254	0
CA03556_01	CA03556_01	-13	23	-50	4	220	0	-14	30	-50	-9	58	-50	0	70	-50	-7	42	-50	-23	20	-50	-17	10	-50	-17	22	-50	-1	31	-50	-3	41	-50	-23	36	-50	-10	37	-50
CA03557_01	CA03557_01	396	489	0	428	601	0	128	129	0	102	236	0	0	397	0	163	250	0	228	180	0	291	255	0	258	380	0	125	268	0	28	246	0	120	171	0	149	266	0
CA03559_01	CA03559_01	67	128	0	111	534	0	21	82	0	8	78	-50	0	145	0	35	94	0	91	176	0	44	86	0	108	100	0	117	53	0	105	27	0	23	74	0	19	102	0
CA03561_01	CA03561_01	-17	21	-50	19	176	-50	-11	24	-50	-4	49	-50	0	61	-50	-1	31	-50	-17	9	-50	-25	-21	-50	-13	26	-50	-3	5	-50	-5	22	-50	-15	12	-50	-5	44	-50
CA03563_01	CA03563_01	1060	1434	0	1451	1650	0	402	228	0	421	546	0	0	1094	0	664	940	0	736	627	0	813	671	0	810	1110	0	614	1272	0	115	738	0	327	563	0	512	805	0
CA03576_01	CA03576_01	53085	58681	0	63398	13931	0	19761	8886	0	17250	18847	0	0	41617	0	22587	47405	0	30342	16313	0	28060	25820	0	33970	52456	0	30410	40137	0	2982	31722	0	22855	26014	0	24661	34798	0
CA03578_01	CA03578_01	387	396	0	386	832	0	71	116	0	73	165	0	0	334	0	145	260	0	150	276	0	157	244	0	199	337	0	108	184	0	30	117	-50	101	123	0	100	220	0
CA03580_01	CA03580_01	577	889	0	517	2679	0	167	185	0	153	301	0	0	496	0	216	614	0	277	871	0	277	310	0	338	521	0	338	387	0	97	237	0	125	205	0	187	371	0
CA03582_01	CA03582_01	330	385	0	312	654	0	98	120	0	97	218	0	0	338	0	117	208	0	148	151	0	177	201	0	185	314	0	145	283	0	20	186	0	124	174	0	139	272	0
CA03584_01	CA03584_01	24743	25858	0	23584	13097	0	6945	5381	0	8482	7153	0	0	16917	0	7386	21912	0	10942	12338	0	12004	21832	0	12096	22180	0	15906	18986	0	1334	9041	0	11007	8417	0	8195	14666	0
CA03585_01	CA03585_01	318	447	0	273	268	0	88	93	0	87	183	0	0	313	0	97	226	0	98	97	0	122	119	0	138	351	0	152	276	0	7	163	-50	65	156	0	122	251	0
CA03599_01	CA03599_01	6591	6215	0	5740	3326	0	2082	1134	0	2506	2346	0	0	4757	0	3579	6380	0	4210	5265	0	4287	5901	0	5016	7353	0	4310	6972	0	627	3384	0	2721	3440	0	3105	5500	0
CA03601_01	CA03601_01	1453	2225	0	1254	1298	0	473	314	0	547	740	0	0	1285	0	604	1186	0	717	384	0	856	710	0	1001	1320	0	936	1251	0	47	592	0	516	642	0	817	1220	0
CA03603_01	CA03603_01	567	563	0	478	877	0	178	128	0	244	326	0	0	601	0	257	361	0	261	205	0	343	311	0	401	584	0	289	575	0	32	278	0	168	270	0	270	525	0
CA03605_01	CA03605_01	-2	18	-50	14	189	-50	-7	34	-50	-10	57	-50	0	68	-50	-3	32	-50	-26	18	-50	-19	18	-50	-13	23	-50	-8	-3	-50	6	38	-50	-15	20	-50	-12	27	-50
CA03607_01	CA03607_01	654	736	0	676	809	0	199	120	0	266	377	0	0	649	0	435	370	0	218	257	0	385	284	0	446	655	0	247	552	0	32	245	0	132	288	0	290	487	0
CA03609_01	CA03609_01	9544	10967	0	10674	6732	0	2839	2244	0	3968	3453	0	0	7995	0	4302	10462	0	3923	4420	0	5761	9907	0	6613	13209	0	4946	11040	0	748	5226	0	6030	5259	0	5803	9067	0
CA03623_01	CA03623_01	2370	3782	0	2289	1492	0	775	544	0	765	958	0	0	1873	0	1170	2346	0	961	666	0	1438	1414	0	1743	2690	0	1478	2109	0	157	1330	0	967	1073	0	1483	2374	0
CA03625_01	CA03625_01	3	36	0	13	197	0	-10	36	-50	-6	60	-50	0	78	-50	-1	49	-50	-16	32	-50	-20	6	-50	-8	41	-50	-3	15	-50	0	51	-50	-23	39	-50	-9	37	-50
CA03627_01	CA03627_01	440	676	0	431	286	0	168	148	0	178	302	0	0	517	0	347	632	0	230	208	0	330	434	0	438	826	0	365	587	0	46	370	0	300	363	0	400	621	0
CA03629_01	CA03629_01	668	1150	0	765	989	0	175	160	0	216	361	0	0	591	0	310	541	0	209	179	0	314	312	0	398	628	0	407	520	0	21	354	0	174	238	0	294	495	0
CA03631_01	CA03631_01	19	49	0	34	157	-50	0	51	-50	8	63	-50	0	84	-50	6	49	-50	-13	9	-50	-14	32	-50	7	46	-50	8	26	-50	11	244	0	3	28	-50	0	41	-50
CA03633_01	CA03633_01	2094	2816	0	2280	3960	0	561	341	0	610	746	0	0	1529	0	806	1510	0	675	1056	0	934	795	0	1261	1938	0	938	1270	0	166	664	0	405	639	0	809	1282	0
CA03918_01	CA03918_01	71	133	0	121	474	0	44	105	0	33	128	0	79	183	-50	69	119	0	90	114	0	94	124	0	107	126	0	47	197	0	24	139	0	58	116	0	72	172	0
CA03920_01	CA03920_01	240	353	0	281	513	0	105	96	0	83	158	0	190	357	0	123	297	0	132	258	0	135	174	0	158	329	0	143	298	0	28	197	0	95	222	0	112	287	0
CA03922_01	CA03922_01	259	323	0	248	393	0	116	91	0	84	169	0	172	306	0	101	233	0	116	146	0	100	149	0	139	295	0	136	298	0	17	183	0	82	201	0	125	248	0
CA03924_01	CA03924_01	635	660	0	631	728	0	260	237	0	197	332	0	399	580	0	323	454	0	364	393	0	308	428	0	372	587	0	220	667	0	32	304	0	318	382	0	281	573	0
CA03926_01	CA03926_01	2546	5882	0	3913	4856	0	1450	955	0	1346	1544	0	2153	2816	0	1707	3730	0	2014	2149	0	1937	2178	0	2289	3569	0	2549	3724	0	293	1911	0	1499	1691	0	1840	2932	0
CA03928_01	CA03928_01	1299	2934	0	1822	2677	0	733	554	0	701	1055	0	1110	1469	0	709	1638	0	904	702	0	867	840	0	977	1377	0	1506	1681	0	122	943	0	663	833	0	701	999	0
CA03941_01	CA03941_01	230	533	0	289	499	0	99	112	0	101	211	0	144	229	0	98	307	0	131	89	0	125	98	0	158	243	0	187	234	0	11	185	0	51	134	-50	130	229	0
CA03942_01	CA03942_01	798	849	0	917	1620	0	399	251	0	323	530	0	593	853	0	497	470	0	501	413	0	498	371	0	610	788	0	315	815	0	71	527	0	263	513	0	467	759	0
CA03944_01	CA03944_01	8647	9020	0	9299	2241	0	2861	1505	0	3303	3099	0	5446	7174	0	3720	7063	0	4455	2223	0	4293	6076	0	4722	8829	0	4543	8671	0	266	4136	0	3714	4103	0	3800	6663	0
CA03946_01	CA03946_01	346	37	0	317	533	0	119	70	0	125	270	0	376	331	0	213	56	0	253	237	0	275	155	0	287	640	0	8	316	0	39	217	0	48	226	0	303	258	0
CA03948_01	CA03948_01	2	37	-50	13	197	-50	-11	43	-50	-4	58	-50	13	85	-50	-9	48	-50	-25	19	-50	-29	6	-50	-6	30	-50	1	28	-50	3	62	-50	-25	33	-50	-10	39	-50
CA03950_01	CA03950_01	-4	42	0	12	269	0	-10	85	-50	-8	146	0	23	147	-50	-6	62	-50	-19	39	-50	-20	23	-50	-4	39	-50	-5	19	-50	4	100	-50	-22	51	-50	-13	41	-50
CA03964_01	CA03964_01	1238	1226	0	1050	1150	0	572	455	0	581	708	0	802	1132	0	478	653	0	585	430	0	679	654	0	776	1173	0	468	1177	0	73	550	0	472	593	0	565	922	0
CA03966_01	CA03966_01	1181	1177	0	1032	950	0	374	296	0	434	508	0	558	877	0	535	824	0	566	534	0	684	701	0	731	1315	0	508	1197	0	70	620	0	495	630	0	556	983	0
CA03968_01	CA03968_01	2220	3063	0	2030	1593	0	700	504	0	924	891	0	1316	1843	0	886	1838	0	1015	1031	0	1306	1868	0	1436	2698	0	1354	2422	0	133	1109	0	1022	1133	0	1065	1731	0
CA00589_01	CA00589_01	44	89	0	44	194	-50	15	56	-50	9	77	-50	33	96	-50	14	79	0	-8	30	-50	3	31	-50	11	65	-50	26	47	-50	5	82	-50	1	70	-50	10	55	-50
CA03971_01	CA03971_01	269	370	0	268	333	0	89	100	0	114	218	0	175	320	0	150	202	0	99	29	0	147	121	0	183	282	0	178	266	0	10	185	0	45	114	0	137	258	0
CA03973_01	CA03973_01	247	231	0	282	263	0	79	92	0	106	176	0	138	304	0	93	140	0	76	88	0	127	173	0	146	362	0	71	296	0	14	208	0	63	184	0	123	311	0
CA03987_01	CA03987_01	508	607	0	547	1008	0	151	124	0	161	272	0	283	462	0	243	391	0	198	294	0	254	267	0	371	535	0	185	381	0	35	234	0	81	203	0	208	363	0
CA03989_01	CA03989_01	1042	1117	0	1058	757	0	332	235	0	388	479	0	508	863	0	530	792	0	422	385	0	517	718	0	664	1123	0	481	1225	0	44	582	0	341	510	0	548	1028	0
CA03991_01	CA03991_01	98	115	0	146	442	0	8	67	0	29	136	0	63	176	-50	143	133	0	19	126	-50	46	90	-50	74	163	0	36	76	-50	17	111	0	18	94	-50	52	168	0
CA03993_01	CA03993_01	155	239	0	204	344	0	45	60	0	66	142	0	89	178	-50	72	179	0	30	67	0	54	96	0	83	206	0	90	162	0	8	71	-50	69	89	0	78	175	0
CA03995_01	CA03995_01	731	733	0	839	601	0	167	126	0	236	285	0	339	636	0	332	455	0	289	203	0	394	332	0	444	711	0	244	577	0	27	301	0	166	275	0	276	559	0
CA03997_01	CA03997_01	369	419	0	453	875	0	121	125	0	135	246	0	224	403	0	188	298	0	134	191	0	225	188	0	304	437	0	148	306	0	32	196	0	132	198	0	215	403	0
CA04286_01	CA04286_01	11	61	0	23	356	0	4	69	0	-8	116	0	1	131	0	-6	80	-50	-17	62	-50	18	82	0	-4	68	-50	7	65	-50	5	76	-50	29	62	0	-6	77	-50
CA04288_01	CA04288_01	-2	27	0	7	211	0	-8	32	-50	-11	62	-50	-11	65	-50	-7	55	-50	-26	20	-50	-15	11	-50	-11	27	-50	5	14	-50	-4	40	-50	-21	22	-50	-8	46	-50
CA04290_01	CA04290_01	1198	899	0	1226	690	0	521	330	0	388	452	0	817	1094	0	478	737	0	751	553	0	786	1168	0	727	1253	0	430	1523	0	67	720	0	594	742	0	562	1062	0
CA04292_01	CA04292_01	-6	8	-50	15	168	-50	-9	11	-50	-12	44	-50	-17	45	-50	-12	15	-50	-25	-4	-50	-16	-22	-50	-15	13	-50	2	-19	-50	-5	-13	-50	-26	6	-50	-16	4	-50
CA04294_01	CA04294_01	65392	65363	0	63416	53296	0	47714	21254	0	50423	43016	0	60040	61149	0	54296	59854	0	61547	37298	0	62380	54555	0	60804	62084	0	60917	60473	0	7662	48889	0	46017	47571	0	55960	59449	0
CA04296_01	CA04296_01	9	61	-50	47	193	-50	18	43	-50	3	65	-50	1	98	-50	12	95	-50	-5	13	-50	-8	12	-50	9	47	-50	18	-1	-50	3	46	-50	4	53	-50	8	50	-50
CA04310_01	CA04310_01	31	128	0	89	472	0	17	126	0	5	162	0	5	244	0	16	142	0	11	75	-50	12	64	-50	26	106	0	36	111	0	9	87	0	3	72	-50	31	98	0
CA04312_01	CA04312_01	308	674	0	436	411	0	137	122	0	143	228	0	194	403	0	138	380	0	175	108	0	172	229	0	182	372	0	271	447	0	18	236	0	161	278	0	196	381	0
CA04314_01	CA04314_01	-16	14	-50	14	189	-50	-17	24	-50	-13	50	-50	-25	49	-50	-10	25	-50	-33	2	-50	-31	-23	-50	-12	26	-50	-9	-6	-50	-1	30	-50	-25	31	-50	-17	39	-50
CA00457_01	CA00457_01	315	607	0	465	1383	0	132	165	0	124	212	0	239	392	0	247	635	0	254	815	0	254	365	0	326	484	0	302	390	0	106	223	0	256	289	0	221	395	0
CA04316_01	CA04316_01	928	1287	0	853	605	0	320	221	0	363	485	0	400	694	0	356	678	0	428	288	0	484	595	0	431	810	0	628	988	0	55	535	0	397	551	0	419	790	0
CA04318_01	CA04318_01	357	348	0	361	335	0	106	94	0	135	212	0	153	334	0	119	218	0	131	247	0	152	266	0	168	339	0	131	313	0	28	234	0	119	202	0	162	372	0
CA04332_01	CA04332_01	-9	15	-50	12	200	0	-16	22	-50	-16	42	-50	-28	70	-50	-12	32	-50	-26	13	-50	-29	-17	-50	-11	13	-50	-9	-8	-50	2	39	-50	-35	40	-50	-17	26	-50
CA04334_01	CA04334_01	1205	1419	0	2757	4258	0	566	404	0	430	513	0	1138	1883	0	609	896	0	549	521	0	940	820	0	916	1561	0	1082	1825	0	137	819	0	521	552	0	852	1478	0
CA04336_01	CA04336_01	0	11	-50	21	162	-50	-1	32	-50	-4	60	-50	-10	71	-50	-8	43	-50	-24	21	-50	-27	-4	-50	-14	19	-50	-6	-7	-50	0	27	-50	-26	16	-50	-16	36	-50
CA04338_01	CA04338_01	115	141	0	209	259	0	28	51	0	54	133	0	60	196	0	90	176	0	47	84	0	91	180	0	97	246	0	87	196	0	11	164	0	85	147	0	91	197	0
CA04340_01	CA04340_01	-4	18	-50	24	321	0	-12	44	-50	-10	75	-50	-20	90	-50	16	58	-50	-24	33	-50	-15	8	-50	-14	37	-50	9	7	-50	16	92	-50	-15	42	-50	-6	52	-50
CA04342_01	CA04342_01	3284	2445	0	3454	2367	0	1007	767	0	1254	1743	0	2178	2766	0	1729	1401	0	2011	1531	0	2141	2214	0	2851	3301	0	936	3014	0	219	1625	0	1001	1368	0	1475	2348	0
CA04356_01	CA04356_01	1440	1674	0	1596	2341	0	495	314	0	586	871	0	826	1246	0	865	1224	0	800	964	0	901	686	0	1181	1637	0	695	1323	0	119	611	0	357	585	0	658	1065	0
CA04358_01	CA04358_01	560	587	0	617	510	0	194	117	0	241	324	0	293	554	0	332	376	0	244	250	0	316	348	0	407	746	0	206	666	0	32	437	0	120	345	0	295	717	0
CA04360_01	CA04360_01	3490	3055	0	3467	2024	0	1167	571	0	1320	1451	0	1881	2887	0	1950	2123	0	1525	1343	0	1899	1573	0	2241	3572	0	1071	3163	0	196	1763	0	889	1551	0	1688	2745	0
CA04362_01	CA04362_01	0	0	-50	19	167	-50	-2	39	-50	-7	56	-50	-32	76	-50	-1	31	-50	-22	8	-50	-21	2	-50	-7	49	-50	-18	15	-50	5	50	-50	-24	31	-50	-12	7	-50
CA04364_01	CA04364_01	3045	5154	0	3269	1346	0	923	562	0	1129	1091	0	1670	2328	0	1432	3976	0	1419	958	0	1712	2209	0	2098	3524	0	1995	2840	0	103	1257	0	1229	1241	0	1676	2692	0
CA04365_01	CA04365_01	-6	28	-50	22	144	-50	0	36	-50	0	64	-50	-21	71	-50	12	38	-50	-22	2	-50	-15	10	-50	-1	26	-50	-7	-2	-50	4	43	-50	-10	56	-50	-11	30	-50
CA04653_01	CA04653_01	1503	4362	0	1803	1508	0	981	707	0	826	1017	0	1784	2431	0	908	2630	0	1249	750	0	1112	1285	0	1225	2130	0	1912	2366	0	206	1576	0	1266	1264	0	1136	1765	0
CA04655_01	CA04655_01	2	37	0	24	283	0	1	67	-50	8	112	0	0	121	-50	-8	60	-50	-21	22	-50	-17	19	-50	-6	51	-50	1	44	-50	-2	66	-50	-20	53	-50	-9	62	-50
CA04657_01	CA04657_01	383	620	0	505	528	0	264	165	0	191	292	0	320	666	0	304	537	0	331	420	0	414	454	0	331	826	0	371	1021	0	71	561	0	302	464	0	319	633	0
CA04659_01	CA04659_01	231	617	0	290	370	0	109	100	0	81	166	0	122	287	0	102	323	0	140	110	0	151	212	0	138	244	0	274	324	0	24	173	0	106	153	0	117	221	0
CA00458_01	CA00458_01	-15	11	-50	7	152	-50	-15	25	-50	-17	45	-50	-35	53	-50	-14	39	-50	-26	6	-50	-26	-3	-50	-11	8	-50	3	10	-50	-5	20	-50	-38	-2	-50	-17	22	-50
CA04662_01	CA04662_01	-2	5	-50	20	174	-50	-14	35	-50	-17	40	-50	-29	63	-50	0	40	-50	-24	15	-50	-21	4	-50	-7	22	-50	2	16	-50	-7	14	-50	-17	46	-50	-12	27	-50
CA04676_01	CA04676_01	140	289	0	270	663	0	73	66	0	68	131	0	76	261	0	89	287	0	103	634	0	108	212	0	111	228	0	106	282	0	73	132	0	92	170	0	105	207	0
CA04678_01	CA04678_01	193	333	0	322	832	0	100	117	0	97	194	0	125	343	0	108	206	0	98	265	0	124	173	0	150	281	0	121	284	0	34	157	0	74	160	0	111	247	0
CA04679_01	CA04679_01	624	1611	0	941	696	0	323	236	0	344	407	0	463	772	0	322	819	0	353	296	0	372	533	0	393	850	0	599	779	0	45	367	0	381	396	0	398	662	0
CA04681_01	CA04681_01	1383	1544	0	2027	3946	0	423	594	0	524	985	0	1002	1253	0	756	853	0	989	1221	0	1003	1459	0	1064	1208	0	779	1532	0	118	586	0	762	688	0	701	1129	0
CA04683_01	CA04683_01	368	406	0	449	408	0	120	103	0	143	230	0	183	376	0	143	265	0	153	248	0	196	196	0	185	367	0	143	339	0	31	207	0	121	208	0	155	303	0
CA04685_01	CA04685_01	327	38	0	378	483	0	107	73	0	126	235	0	183	365	0	137	38	0	133	143	0	182	89	0	165	263	0	1	272	0	30	169	0	42	182	0	144	245	0
CA04699_01	CA04699_01	41	74	0	58	206	0	13	34	-50	18	90	0	0	94	0	15	76	0	1	36	-50	2	35	-50	28	74	0	23	71	-50	13	93	-50	16	56	-50	32	112	0
CA04701_01	CA04701_01	-2	13	-50	23	201	0	-8	26	-50	0	53	-50	-13	82	-50	90	86	0	4	42	-50	16	56	-50	36	84	-50	51	91	-50	22	125	0	102	157	0	80	116	0
CA04703_01	CA04703_01	502	590	0	502	530	0	184	124	0	226	349	0	259	559	0	183	338	0	163	152	0	266	244	0	272	532	0	271	446	0	34	352	0	161	293	0	254	467	0
CA04705_01	CA04705_01	552	534	0	489	560	0	205	167	0	220	337	0	278	578	0	228	417	0	260	326	0	322	452	0	414	705	0	265	665	0	37	327	0	293	397	0	321	603	0
CA04707_01	CA04707_01	9	37	-50	23	215	-50	-13	24	-50	-12	59	-50	-17	85	-50	-5	52	-50	-21	27	-50	-27	1	-50	-15	38	-50	-3	27	-50	5	109	0	-2	47	-50	-11	37	-50
CA04709_01	CA04709_01	264	217	0	321	274	0	99	74	0	113	169	0	116	313	0	138	178	0	123	131	0	161	171	0	190	333	0	75	273	0	21	192	0	69	188	0	137	336	0
CA04722_01	CA04722_01	-8	14	-50	18	167	-50	-4	37	-50	-3	69	-50	-31	56	-50	0	40	-50	-22	3	-50	-24	-5	-50	-8	26	-50	-12	-14	-50	3	74	-50	-31	38	-50	-6	25	-50
CA04724_01	CA04724_01	3005	8023	0	4271	6817	0	861	711	0	1461	1769	0	2566	3076	0	1952	8329	0	1956	5002	0	2269	3045	0	2594	4164	0	5709	3588	0	505	1334	0	1395	1299	0	1741	2637	0
CA04726_01	CA04726_01	302	462	0	450	1363	0	32	76	0	131	216	0	183	372	0	456	355	0	180	335	0	251	266	0	207	338	0	195	303	0	25	175	0	118	163	0	152	294	0
CA04728_01	CA04728_01	10315	12127	0	11251	13158	0	3727	2019	0	5111	5998	0	6816	8785	0	7774	11339	0	7064	9838	0	7552	7479	0	9399	11384	0	6658	12593	0	1140	5856	0	4216	5646	0	7948	11925	0
CA04730_01	CA04730_01	116	50	0	143	435	0	34	68	0	49	116	0	44	152	0	75	75	0	34	207	0	71	79	-50	105	146	0	14	92	-50	29	95	-50	15	68	-50	60	142	0
CA04732_01	CA04732_01	298	342	0	415	780	0	130	111	0	141	239	0	178	385	0	230	294	0	201	305	0	248	261	0	292	530	0	130	472	0	53	280	0	168	282	0	230	465	0
CA05022_01	CA05022_01	1076	2076	0	966	1352	0	596	387	0	447	671	0	987	1435	0	478	1145	0	697	672	0	597	654	0	738	1102	0	931	1312	0	138	845	0	571	809	0	691	1082	0
CA05023_01	CA05023_01	262	386	0	320	512	0	181	117	0	119	223	0	277	461	0	170	229	0	200	145	0	176	139	0	231	346	0	182	443	0	29	286	0	154	328	0	247	487	0
CA05025_01	CA05025_01	1377	3065	0	1881	2522	0	875	433	0	849	921	0	1493	2193	0	864	2072	0	1082	1967	0	1188	1304	0	1179	1978	0	1781	2433	0	354	1145	0	806	1084	0	928	1644	0
CA05027_01	CA05027_01	111	504	0	219	301	0	70	161	0	64	112	0	73	277	0	77	280	0	64	113	0	96	406	0	98	190	0	178	343	0	32	235	0	218	160	0	81	252	0
CA05029_01	CA05029_01	11	41	0	64	177	0	14	13	-50	1	46	-50	8	84	-50	6	59	-50	3	40	-50	3	18	-50	20	58	-50	19	47	-50	3	38	-50	6	30	-50	23	62	-50
CA05031_01	CA05031_01	97	244	0	205	308	0	76	80	0	57	121	0	82	183	0	69	215	0	81	180	0	78	151	0	84	180	0	104	202	0	36	137	0	91	129	0	87	171	0
CA05045_01	CA05045_01	177	124	0	280	312	0	128	105	0	119	175	0	164	283	0	135	149	0	154	204	0	172	209	0	187	331	0	53	435	0	33	247	0	164	235	0	181	389	0
CA05047_01	CA05047_01	398	1053	0	547	579	0	259	160	0	238	459	0	513	609	0	287	527	0	323	189	0	349	263	0	384	781	0	347	550	0	25	272	0	170	321	0	395	451	0
CA05049_01	CA05049_01	558	752	0	564	1077	0	637	645	0	506	649	0	1019	1276	0	363	457	0	374	324	0	631	566	0	660	1108	0	538	1319	0	138	794	0	800	762	0	817	1325	0
CA05051_01	CA05051_01	1846	2193	0	1980	4745	0	675	385	0	725	1036	0	1176	1692	0	994	1467	0	1152	2752	0	1313	1140	0	1245	1778	0	979	1901	0	335	951	0	565	1011	0	859	1468	0
CA05053_01	CA05053_01	4663	6450	0	4906	4987	0	1951	1083	0	2058	2544	0	2561	3925	0	2040	3563	0	2293	1919	0	2812	2709	0	2836	4469	0	2763	5245	0	298	2639	0	1678	2448	0	2618	4488	0
CA05055_01	CA05055_01	4	18	-50	18	101	-50	-14	12	-50	-4	47	-50	-20	35	-50	-11	22	-50	-20	8	-50	-23	3	-50	-8	10	-50	-2	5	-50	6	15	-50	-19	8	-50	-8	15	-50
CA05069_01	CA05069_01	306	467	0	434	732	0	114	79	0	149	199	0	153	344	0	141	330	0	147	321	0	185	252	0	194	354	0	191	381	0	48	219	0	141	205	0	149	323	0
CA05071_01	CA05071_01	274	318	0	379	471	0	104	91	0	107	163	0	146	334	0	153	249	0	139	276	0	206	263	0	181	409	0	140	440	0	48	267	0	136	217	0	153	341	0
CA05073_01	CA05073_01	1831	7870	0	2060	2128	0	1321	823	0	1303	1484	0	1528	2457	0	1021	6437	0	1030	1486	0	1458	1616	0	1521	2682	0	3992	2259	0	490	2076	0	1792	1945	0	1799	2705	0
CA05075_01	CA05075_01	112	223	0	117	473	0	31	59	0	49	115	0	56	177	0	38	133	0	22	75	-50	30	70	-50	67	111	-50	102	107	-50	11	70	-50	41	63	-50	64	98	0
CA05077_01	CA05077_01	2356	3791	0	2612	1804	0	859	463	0	867	1110	0	1491	2448	0	1021	2812	0	870	2004	0	1507	2161	0	1439	3061	0	2117	2765	0	322	1343	0	1043	1191	0	1183	2074	0
CA05079_01	CA05079_01	8113	7992	0	7583	3748	0	2535	1497	0	3176	3083	0	4658	6579	0	3801	6679	0	3457	2711	0	4312	5515	0	5448	9952	0	3480	8869	0	659	5162	0	3075	4232	0	4612	7550	0
CA05093_01	CA05093_01	148	322	0	264	515	0	82	72	0	99	173	0	128	265	0	118	206	0	101	110	0	125	117	0	174	274	0	143	280	0	30	146	0	91	134	0	158	302	0
CA05095_01	CA05095_01	264	702	0	571	787	0	287	242	0	314	419	0	354	600	0	335	714	0	273	421	0	330	459	0	410	813	0	383	635	0	120	571	0	428	534	0	504	874	0
CA05097_01	CA05097_01	1402	3217	0	2497	2371	0	723	476	0	1061	1156	0	1390	1963	0	1123	2431	0	1097	958	0	1274	1352	0	1372	2230	0	1637	2466	0	137	1209	0	801	1105	0	1376	2245	0
CA05099_01	CA05099_01	-9	9	-50	16	72	-50	-9	19	-50	-7	53	-50	-19	35	-50	6	26	-50	-19	4	-50	-14	8	-50	-9	16	-50	-11	-14	-50	4	32	-50	-13	27	-50	-12	4	-50
CA05101_01	CA05101_01	583	819	0	869	1064	0	351	249	0	447	510	0	551	833	0	498	872	0	471	878	0	490	718	0	615	1080	0	368	1013	0	118	587	0	473	579	0	637	1189	0
CA05103_01	CA05103_01	78	165	0	177	355	0	53	53	0	67	124	0	80	197	0	91	161	0	77	128	0	98	101	0	115	192	0	81	159	0	22	159	0	63	105	0	115	233	0
CA05392_01	CA05392_01	3	25	-50	24	143	-50	14	41	-50	-2	52	-50	12	91	-50	-2	30	-50	-11	20	-50	11	65	-50	2	28	-50	1	12	-50	5	43	-50	5	23	-50	1	38	-50
CA05394_01	CA05394_01	2306	3763	0	2846	6251	0	1770	1698	0	1450	1749	0	3317	3848	0	1781	3596	0	2470	4780	0	2160	3745	0	2341	3431	0	1864	4602	0	768	2226	0	2361	2379	0	2355	3652	0
CA05396_01	CA05396_01	610	484	0	714	1736	0	376	310	0	290	536	0	683	922	0	528	494	0	626	1315	0	626	722	0	687	891	0	227	1125	0	157	580	0	330	595	0	465	828	0
CA05398_01	CA05398_01	16	78	0	41	153	-50	13	50	0	13	50	-50	16	101	-50	10	69	-50	-4	24	-50	-1	24	-50	8	34	-50	18	22	-50	13	45	-50	27	14	-50	3	31	-50
CA05400_01	CA05400_01	938	1583	0	2090	1211	0	732	470	0	511	633	0	1061	1539	0	691	925	0	946	900	0	975	1736	0	950	1627	0	677	2077	0	118	792	0	801	869	0	811	1319	0
CA05402_01	CA05402_01	13	67	0	73	181	-50	31	41	-50	17	58	-50	5	109	-50	35	152	0	28	70	-50	33	62	-50	50	105	-50	72	127	-50	28	109	-50	88	111	-50	85	169	0
CA05416_01	CA05416_01	5280	9911	0	6556	3095	0	3011	1411	0	3130	3572	0	4096	5782	0	2752	5997	0	3770	2369	0	3666	4144	0	3476	6305	0	5042	8195	0	353	3561	0	3449	4546	0	3763	5879	0
CA05418_01	CA05418_01	383	310	0	460	345	0	203	92	0	173	289	0	237	494	0	215	195	0	243	196	0	231	142	0	290	509	0	144	549	0	27	302	0	99	295	0	222	436	0
CA05420_01	CA05420_01	334	455	0	365	248	0	143	82	0	127	182	0	212	393	0	146	260	0	168	115	0	178	174	0	200	408	0	213	404	0	24	242	0	127	218	0	213	365	0
CA05422_01	CA05422_01	117	163	0	142	258	0	149	118	0	101	152	0	139	295	0	154	339	0	174	293	0	184	258	0	204	400	0	256	497	0	77	344	0	258	292	0	260	452	0
CA05424_01	CA05424_01	14	33	0	26	150	-50	-2	13	-50	0	44	-50	-20	60	-50	1	44	-50	-12	34	-50	-10	-2	-50	5	36	-50	12	43	-50	11	34	-50	-6	23	-50	5	31	-50
CA05426_01	CA05426_01	79	103	0	66	218	0	16	37	-50	27	81	0	12	112	0	25	43	0	26	58	-50	22	76	-50	36	100	0	48	669	0	8	102	0	57	59	-50	34	116	0
CA05440_01	CA05440_01	233	313	0	269	300	0	114	69	0	117	163	0	129	304	0	81	244	0	78	261	0	100	219	0	116	292	0	153	283	0	38	183	0	129	179	0	121	268	0
CA05442_01	CA05442_01	1402	3404	0	1809	1188	0	842	749	0	669	1074	0	936	1661	0	931	1851	0	1022	467	0	1132	1266	0	1215	1832	0	1379	1926	0	110	1281	0	1068	1007	0	1225	1723	0
CA05444_01	CA05444_01	1814	2139	0	2500	1666	0	1108	463	0	1269	1395	0	1641	2387	0	1375	1848	0	1306	1655	0	1671	1706	0	1668	2845	0	1797	3452	0	317	1605	0	1192	1633	0	1792	2691	0
CA05446_01	CA05446_01	809	1963	0	1166	869	0	459	256	0	504	615	0	636	1078	0	496	1022	0	431	463	0	521	549	0	619	1392	0	767	1207	0	57	463	0	390	578	0	593	1005	0
CA05448_01	CA05448_01	193	436	0	280	223	0	98	70	0	95	171	0	186	319	0	534	318	0	172	145	0	259	316	0	290	418	0	298	523	0	46	284	0	354	355	0	297	451	0
CA05450_01	CA05450_01	2926	7358	0	3447	2537	0	1306	1261	0	1474	1932	0	1944	3146	0	1596	4105	0	1565	986	0	1713	2614	0	2442	3994	0	2965	3327	0	264	2248	0	1947	1730	0	2117	3292	0
CA05464_01	CA05464_01	14	777	0	51	194	-50	10	39	-50	10	60	-50	23	77	-50	23	1048	0	0	53	-50	13	49	-50	28	76	-50	632	31	0	10	55	-50	11	23	-50	58	42	-50
CA05466_01	CA05466_01	12	2	-50	38	125	-50	15	33	-50	12	27	-50	27	27	-50	70	139	0	391	332	0	82	155	0	76	159	0	112	223	0	14	37	-50	30	53	-50	12	43	-50
CA05468_01	CA05468_01	283	782	0	516	282	0	226	177	0	266	328	0	255	503	0	299	555	0	266	140	0	282	396	0	352	639	0	339	765	0	30	430	0	301	362	0	344	657	0
CA05470_01	CA05470_01	6	50	0	62	237	0	7	35	-50	10	63	-50	-1	57	-50	18	68	-50	3	76	-50	7	38	-50	21	52	-50	17	25	-50	18	77	-50	10	34	-50	21	55	-50
CA05472_01	CA05472_01	197	468	0	481	1288	0	148	109	0	177	245	0	272	464	0	221	474	0	177	345	0	289	245	0	285	478	0	256	428	0	52	233	0	137	172	0	220	368	0
CA05474_01	CA05474_01	212	433	0	474	368	0	132	100	0	179	268	0	242	379	0	166	308	0	141	115	0	178	226	0	217	442	0	223	634	0	17	238	0	183	237	0	233	416	0
CA05756_01	CA05756_01	491	521	0	658	844	0	645	539	0	342	463	0	924	1294	0	549	557	0	697	796	0	770	1108	0	671	958	0	443	2129	0	181	1377	0	1285	1321	0	1268	2147	0
CA05758_01	CA05758_01	20	86	0	41	200	0	15	35	-50	6	57	0	56	125	0	36	104	0	35	153	0	33	62	-50	47	85	-50	37	94	-50	22	46	0	43	69	-50	85	201	0
CA05760_01	CA05760_01	399	796	0	502	1670	0	239	289	0	160	303	0	423	663	0	247	498	0	281	570	0	285	454	0	361	534	0	277	567	0	98	267	0	245	283	0	252	466	0
CA05762_01	CA05762_01	-11	25	-50	13	157	-50	-3	19	-50	-8	29	-50	-13	48	-50	-8	25	-50	-14	1	-50	-16	-5	-50	-6	20	-50	-1	6	-50	1	26	-50	-10	7	-50	-4	15	-50
CA05764_01	CA05764_01	474	1281	0	734	619	0	440	395	0	318	556	0	566	953	0	386	814	0	453	326	0	467	724	0	483	909	0	548	1153	0	99	730	0	545	600	0	493	920	0
CA05766_01	CA05766_01	1529	2044	0	1513	1151	0	1053	590	0	839	1113	0	1035	1805	0	704	1471	0	958	671	0	1055	1035	0	976	1580	0	919	1977	0	199	1472	0	918	1342	0	1244	2157	0
CA05780_01	CA05780_01	1388	2762	0	1264	2012	0	819	542	0	659	908	0	930	1461	0	733	1766	0	966	721	0	943	925	0	895	1266	0	1481	1849	0	131	1035	0	735	1022	0	1054	1753	0
CA05782_01	CA05782_01	4001	4795	0	3471	1452	0	1822	1196	0	1458	1962	0	2542	3713	0	1718	2632	0	2324	869	0	2098	2457	0	2313	3540	0	1889	4303	0	169	2294	0	2013	2316	0	2401	3509	0
CA05784_01	CA05784_01	468	609	0	605	448	0	244	88	0	207	316	0	259	576	0	189	436	0	240	311	0	262	204	0	283	578	0	366	572	0	39	338	0	133	310	0	260	467	0
CA00642_01	CA00642_01	347	259	0	437	365	0	173	105	0	157	218	0	213	390	0	156	181	0	164	182	0	190	219	0	191	372	0	142	518	0	37	277	0	160	309	0	263	481	0
CA05787_01	CA05787_01	366	419	0	512	701	0	195	127	0	209	267	0	241	487	0	219	293	0	216	333	0	290	267	0	317	442	0	219	621	0	65	339	0	224	313	0	279	552	0
CA05789_01	CA05789_01	339	422	0	489	607	0	180	128	0	168	225	0	210	461	0	140	310	0	132	403	0	200	335	0	210	416	0	203	484	0	78	255	0	210	235	0	219	439	0
CA05803_01	CA05803_01	41864	2363	0	63049	11454	0	19753	4274	0	22679	25615	0	35859	41059	0	25278	1892	0	22249	5786	0	38166	12958	0	32952	42930	0	1885	56184	0	760	23766	0	7749	26076	0	33230	38622	0
CA05805_01	CA05805_01	182	163	0	480	1694	0	514	838	0	258	546	0	719	1452	0	423	528	0	409	961	0	1096	1811	0	814	1279	0	549	3974	0	780	2665	0	1371	1450	0	919	1896	0
CA05807_01	CA05807_01	1657	2017	0	2196	1437	0	738	495	0	877	900	0	1318	1967	0	777	1539	0	714	659	0	987	1538	0	962	1984	0	1017	2378	0	109	1091	0	924	1158	0	976	1827	0
CA05809_01	CA05809_01	26	59	0	70	202	-50	9	25	-50	3	68	-50	-1	90	-50	24	54	-50	-1	29	-50	17	33	-50	27	73	-50	6	50	-50	5	60	0	11	47	-50	23	73	-50
CA05811_01	CA05811_01	147	483	0	205	335	0	79	93	0	73	172	0	95	245	0	87	231	0	55	50	-50	74	92	0	108	202	0	211	213	0	6	132	0	74	141	0	128	197	0
CA00643_01	CA00643_01	609	1294	0	966	459	0	303	337	0	346	339	0	383	742	0	407	900	0	372	345	0	454	1281	0	580	1006	0	499	1298	0	59	613	0	608	501	0	395	904	0
CA05826_01	CA05826_01	325	783	0	622	1072	0	241	177	0	257	352	0	310	601	0	332	594	0	284	424	0	348	346	0	402	639	0	338	542	0	93	366	0	225	295	0	313	547	0
CA05828_01	CA05828_01	127	396	0	389	432	0	129	112	0	160	192	0	164	366	0	180	349	0	118	147	0	164	226	0	190	366	0	200	358	0	45	280	0	206	268	0	231	461	0
CA05830_01	CA05830_01	19	95	0	98	288	0	27	54	0	21	89	0	19	97	0	64	77	0	16	63	-50	25	39	-50	47	104	0	38	92	-50	24	91	0	27	48	-50	59	124	0
CA05832_01	CA05832_01	838	1546	0	1570	1223	0	572	453	0	668	816	0	863	1305	0	625	1457	0	652	919	0	719	1173	0	681	1695	0	708	1357	0	117	726	0	739	684	0	765	1243	0
CA05834_01	CA05834_01	13	38	0	64	167	0	32	40	-50	16	69	0	15	92	-50	20	55	-50	0	12	-50	7	3	-50	25	59	-50	14	15	-50	6	57	-50	4	37	-50	30	64	-50
CA05836_01	CA05836_01	427	1304	0	1129	1579	0	344	253	0	431	603	0	614	953	0	448	957	0	361	627	0	532	595	0	611	970	0	667	877	0	188	566	0	480	526	0	714	1182	0
CA06122_01	CA06122_01	29	335	0	52	180	0	5	41	-50	7	45	-50	29	108	0	26	434	0	24	60	-50	38	130	0	39	63	0	245	70	0	9	58	-50	110	54	0	41	91	0
CA06124_01	CA06124_01	532	654	0	648	702	0	367	226	0	1132	1938	0	469	781	0	322	458	0	392	572	0	384	657	0	455	747	0	349	1208	0	99	561	0	445	572	0	477	939	0
CA06126_01	CA06126_01	99	101	0	148	326	0	82	77	0	59	120	0	106	230	0	78	152	0	103	269	0	93	212	0	99	260	0	52	361	0	50	289	0	116	245	0	155	314	0
CA06128_01	CA06128_01	731	964	0	692	1028	0	392	271	0	369	477	0	517	851	0	381	785	0	472	1017	0	495	711	0	426	825	0	533	1232	0	143	594	0	450	630	0	398	839	0
CA00653_01	CA00653_01	5152	8180	0	4470	5226	0	2570	1749	0	2794	3077	0	4029	5605	0	2539	4966	0	3261	2721	0	2540	3668	0	2804	5103	0	3883	7218	0	558	4122	0	2988	3529	0	3236	5443	0
CA06131_01	CA06131_01	313	414	0	295	275	0	167	105	0	99	197	0	135	343	0	144	311	0	164	144	0	167	182	0	175	359	0	198	433	0	28	282	0	166	258	0	172	343	0
CA06145_01	CA06145_01	7633	15079	0	6509	2692	0	4292	2816	0	3198	3786	0	4985	7233	0	3171	11914	0	3997	3187	0	4768	8054	0	4085	8495	0	8289	10203	0	537	4638	0	5665	5482	0	4878	7601	0
CA10299_01	CA10299_01	8125	8045	0	8658	3158	0	3732	1351	0	3330	2948	0	4275	7884	0	3840	6127	0	4434	3479	0	4556	5212	0	3982	8496	0	4198	11469	0	635	6622	0	4122	6126	0	5278	9915	0
CA06148_01	CA06148_01	-1	24	-50	31	91	-50	-3	12	-50	-2	48	-50	-12	54	-50	-2	25	-50	-16	1	-50	-19	-2	-50	4	29	-50	-1	5	-50	0	31	-50	13	60	-50	0	33	-50
CA06150_01	CA06150_01	-5	2	-50	16	133	0	-11	16	-50	-9	37	-50	-33	34	-50	-6	19	-50	-17	-3	-50	-20	-6	-50	-7	22	-50	-9	-19	-50	1	21	-50	-8	28	-50	-8	11	-50
CA06152_01	CA06152_01	1007	1494	0	1058	1184	0	498	416	0	493	627	0	621	1079	0	480	1016	0	439	527	0	621	949	0	547	1000	0	748	1294	0	90	639	0	704	722	0	659	1259	0
CA06154_01	CA06154_01	609	430	0	702	1000	0	352	148	0	342	526	0	579	811	0	364	314	0	358	275	0	495	297	0	459	642	0	320	1012	0	52	462	0	252	537	0	573	943	0
CA06166_01	CA06166_01	198	426	0	253	275	0	118	95	0	113	197	0	144	279	0	106	363	0	113	130	0	119	208	0	118	242	0	276	279	0	34	209	0	155	191	0	154	257	0
CA06168_01	CA06168_01	192	196	0	202	262	0	90	53	0	82	135	0	62	226	0	94	194	0	81	95	0	110	120	0	103	220	0	99	306	0	18	184	0	73	150	0	122	291	0
CA06170_01	CA06170_01	-5	28	0	74	192	0	34	39	-50	6	58	-50	7	102	-50	14	67	0	-8	6	-50	-6	-5	-50	8	34	-50	85	82	0	16	119	-50	4	40	-50	56	134	0
CA06172_01	CA06172_01	1080	2701	0	1270	834	0	507	413	0	486	762	0	824	1275	0	525	1478	0	602	205	0	737	1004	0	757	1385	0	1281	1444	0	41	699	0	760	701	0	903	1417	0
CA06174_01	CA06174_01	184	625	0	340	293	0	138	133	0	127	200	0	191	404	0	137	372	0	123	63	0	161	285	0	200	404	0	240	335	0	15	218	0	192	185	0	213	375	0
CA06176_01	CA06176_01	379	1552	0	699	853	0	284	186	0	288	391	0	452	830	0	342	1025	0	334	303	0	405	489	0	515	843	0	687	841	0	69	460	0	317	353	0	480	815	0
CA06190_01	CA06190_01	512	1311	0	921	632	0	409	292	0	449	621	0	576	863	0	501	994	0	458	222	0	527	555	0	615	1104	0	678	1091	0	50	632	0	473	556	0	719	1098	0
CA06192_01	CA06192_01	34	173	0	130	238	0	56	64	0	53	114	0	49	157	0	77	189	0	67	53	0	73	83	-50	91	185	0	86	213	0	23	149	0	55	113	0	101	200	0
CA06194_01	CA06194_01	-21	-5	-50	13	89	-50	-15	12	-50	-11	37	-50	-33	38	-50	3	30	-50	-25	10	-50	-13	-9	-50	-3	14	-50	-2	-27	-50	5	35	-50	-23	-3	-50	-7	19	-50
CA06196_01	CA06196_01	832	1168	0	1820	2404	0	516	297	0	636	830	0	919	1335	0	891	1122	0	766	1156	0	983	770	0	1040	1493	0	692	1430	0	125	719	0	458	698	0	814	1225	0
CA06198_01	CA06198_01	163	245	0	335	433	0	137	111	0	111	206	0	169	308	0	130	201	0	103	166	0	156	162	0	182	296	0	113	268	0	28	200	0	95	188	0	172	265	0
CA06200_01	CA06200_01	-15	-6	-50	12	92	-50	-10	8	-50	-9	36	-50	-33	48	-50	-6	12	-50	-24	-3	-50	-16	-13	-50	-7	5	-50	-14	-29	-50	2	-13	-50	-23	0	-50	-16	7	-50
Empty	Empty	45	78	0	25	137	-50	17	27	-50	118	70	0	33	44	-50	74	130	0	101	144	0	168	236	0	68	103	0	90	364	0	39	139	0	38	46	-50	14	46	-50
Empty	Empty	18	16	0	19	116	-50	13	31	-50	16	46	-50	30	106	0	76	130	0	47	52	-50	112	180	0	82	129	0	110	308	0	24	134	0	92	156	0	16	39	-50
Empty	Empty	12	13	0	29	118	-50	10	27	-50	46	73	0	29	48	-50	70	116	0	132	133	0	86	165	0	76	133	0	103	242	0	16	54	-50	35	40	-50	12	42	-50
Empty	Empty	17	16	-50	32	302	0	17	18	-50	29	43	-50	24	30	-50	77	140	0	127	214	0	100	159	0	63	144	0	90	227	0	31	119	0	80	127	0	15	56	-50
Empty	Empty	21	18	0	38	257	0	44	47	0	15	33	-50	23	20	-50	96	129	0	162	174	0	42	76	0	77	121	0	112	261	0	16	60	-50	45	59	-50	15	35	-50
Empty	Empty	30	44	0	22	104	-50	11	27	-50	19	73	0	22	44	-50	99	175	0	162	224	0	40	73	-50	67	143	0	109	252	0	32	205	0	72	121	0	14	66	-50
Empty	Empty	17	14	0	882	132	-50	12	19	-50	10	32	-50	27	24	-50	109	160	0	141	180	0	111	126	0	60	122	0	117	217	0	16	58	-50	34	41	-50	8	30	-50
Empty	Empty	21	19	-50	20	152	-50	13	23	-50	10	19	-50	31	42	-50	70	126	0	189	166	0	26	44	-50	26	54	-50	103	243	0	14	57	-50	35	42	-50	14	30	-50
Empty	Empty	26	14	0	101	215	0	12	20	-50	16	28	-50	38	41	-50	84	124	0	218	231	0	64	68	0	63	115	0	93	215	0	36	167	0	38	40	-50	15	46	-50
Empty	Empty	45	36	0	59	226	0	8	29	-50	31	73	0	24	43	-50	78	123	0	262	232	0	51	122	0	60	85	0	103	292	0	32	149	0	34	38	-50	19	44	-50
Empty	Empty	-3	-7	-50	13	45	-50	2	13	-50	3	9	-50	0	16	-50	1	15	-50	3	24	-50	4	18	-50	4	12	-50	7	24	-50	5	26	-50	11	24	-50	4	19	-50
Empty	Empty	11	3	-50	13	45	-50	6	14	-50	1	22	-50	-6	20	-50	1	24	-50	5	24	-50	3	24	-50	5	20	-50	10	32	-50	8	38	0	9	20	-50	4	19	-50
Empty	Empty	20	21	0	44	112	-50	19	40	-50	18	36	-50	28	43	-50	78	139	0	175	186	0	54	107	0	53	95	0	100	240	0	18	68	-50	41	76	-50	50	61	0
Empty	Empty	-2	-5	-50	14	45	-50	-6	7	-50	2	13	-50	-6	14	-50	3	7	-50	2	15	-50	3	14	-50	2	26	-50	6	26	-50	7	19	-50	6	20	-50	3	10	-50
Empty	Empty	675	591	0	889	967	0	553	373	0	298	428	0	629	1000	0	350	598	0	438	479	0	705	740	0	577	1175	0	657	1523	0	164	1006	0	578	805	0	971	1852	0
Empty	Empty	8	9	-50	26	140	-50	14	21	-50	20	35	-50	28	28	-50	102	138	0	45	77	-50	31	49	-50	54	106	0	104	233	0	13	43	-50	48	45	-50	22	48	-50
Empty	Empty	24	12	-50	15	269	0	17	19	-50	17	24	-50	35	34	-50	84	140	0	120	175	0	34	65	-50	42	113	0	117	269	0	14	49	-50	96	106	0	16	42	-50
Empty	Empty	7	8	0	15	82	-50	10	18	-50	11	24	-50	23	29	-50	82	128	0	108	157	0	25	39	-50	39	65	-50	79	225	0	14	47	-50	30	49	-50	19	31	-50
Empty	Empty	9	10	-50	25	159	-50	15	26	-50	17	26	-50	25	30	-50	51	84	0	130	169	0	35	35	-50	67	110	0	44	94	-50	22	64	-50	27	39	-50	17	56	-50
Empty	Empty	9	2	-50	26	110	-50	9	20	-50	4	16	-50	22	27	-50	24	58	-50	122	159	0	51	143	0	70	126	0	99	259	0	26	84	-50	36	46	-50	15	39	-50
Empty	Empty	-1	-2	-50	8	48	-50	2	11	-50	4	7	-50	2	22	-50	3	19	-50	0	21	-50	-1	22	-50	8	16	-50	8	21	-50	1	2	-50	0	7	-50	2	28	-50
Empty	Empty	11	7	0	42	147	-50	20	36	-50	8	41	-50	25	42	-50	43	115	0	76	173	0	78	223	0	36	99	0	87	194	0	44	187	0	39	42	-50	19	34	-50
Empty	Empty	18	15	-50	31	141	-50	17	22	-50	18	40	-50	19	34	-50	34	59	0	111	181	0	52	104	0	73	112	0	121	239	0	42	175	0	34	32	-50	16	43	-50
Empty	Empty	17	8	-50	33	99	-50	16	23	-50	13	34	-50	29	49	-50	45	82	0	121	223	0	68	117	0	49	112	0	93	210	0	23	108	-50	39	41	-50	44	87	0
CA01245_01	CA01245_01	999	1684	0	840	674	0	586	463	0	437	551	0	809	1219	0	235	711	0	313	301	0	345	682	0	330	658	0	555	1025	0	96	808	0	803	772	0	554	1041	0
CA02108_01	CA02108_01	5887	8973	0	4981	2905	0	4185	2668	0	2917	3157	0	5129	8489	0	2075	5429	0	3054	1914	0	3143	4991	0	2719	5326	0	5368	9795	0	411	4750	0	5992	6232	0	4567	8485	0
CA02349_01	CA02349_01	1090	1541	0	786	512	0	577	710	0	443	726	0	705	1322	0	285	819	0	420	291	0	414	757	0	409	807	0	503	1187	0	77	842	0	782	777	0	548	1146	0
CA03035_01	CA03035_01	936	2236	0	656	716	0	688	462	0	455	645	0	822	1408	0	278	900	0	373	294	0	398	591	0	339	817	0	916	1459	0	121	1003	0	826	940	0	703	1249	0
CA04053_01	CA04053_01	-8	22	-50	7	117	-50	-5	24	-50	-10	36	-50	-12	48	-50	13	32	0	-21	8	-50	-17	-4	-50	-5	19	-50	6	40	-50	0	13	-50	-10	2	-50	-4	35	-50
CA04302_01	CA04302_01	983	1562	0	666	643	0	666	636	0	543	636	0	754	1217	0	308	851	0	445	365	0	442	881	0	407	794	0	637	1132	0	109	833	0	1002	870	0	616	1062	0
CA01245_01	CA01245_01	835	1656	0	769	587	0	616	458	0	445	530	0	613	1137	0	232	754	0	354	345	0	356	588	0	313	672	0	627	1046	0	98	680	0	648	746	0	541	968	0
CA02108_01	CA02108_01	7082	9948	0	5122	2566	0	4867	2895	0	3424	3389	0	3991	7379	0	2037	5143	0	2974	1964	0	3193	4626	0	2517	5088	0	5309	9247	0	491	5197	0	6273	6422	0	5158	8911	0
CA02349_01	CA02349_01	1108	1471	0	852	565	0	501	569	0	413	732	0	628	1156	0	328	777	0	418	325	0	356	722	0	345	708	0	464	1169	0	47	589	0	713	770	0	585	1185	0
CA03035_01	CA03035_01	906	2051	0	835	651	0	653	406	0	535	704	0	751	1315	0	277	867	0	371	300	0	423	614	0	346	847	0	964	1367	0	88	766	0	810	945	0	717	1304	0
CA04053_01	CA04053_01	-7	21	-50	21	65	0	-9	25	-50	-3	37	-50	-25	45	-50	-5	43	-50	-19	16	-50	-1	39	-50	-5	23	-50	0	12	-50	3	24	-50	-10	26	-50	-3	31	-50
CA04302_01	CA04302_01	938	1473	0	667	639	0	568	577	0	530	609	0	752	1172	0	335	767	0	358	317	0	401	790	0	398	811	0	677	1182	0	77	694	0	895	766	0	592	1020	0
CA01245_01	CA01245_01	865	1479	0	714	524	0	483	402	0	481	564	0	584	987	0	258	700	0	259	277	0	337	576	0	313	652	0	563	961	0	74	603	0	653	664	0	565	1024	0
CA02108_01	CA02108_01	5271	7831	0	4607	2460	0	3896	2340	0	3498	3676	0	4453	7563	0	2047	5269	0	2698	1872	0	3024	4455	0	2824	5633	0	5547	9529	0	491	6076	0	5628	5983	0	5717	10799	0
CA02349_01	CA02349_01	1000	1385	0	761	472	0	466	507	0	423	732	0	582	1119	0	345	819	0	368	268	0	408	744	0	378	833	0	487	1278	0	63	822	0	614	697	0	616	1217	0
CA03035_01	CA03035_01	812	1781	0	683	593	0	540	350	0	485	633	0	677	1164	0	322	876	0	328	276	0	436	573	0	366	872	0	894	1281	0	84	828	0	768	835	0	949	1590	0
CA04053_01	CA04053_01	-22	4	-50	8	305	0	-9	16	-50	-6	34	-50	-20	59	-50	-4	34	-50	-18	12	-50	-15	9	-50	-2	9	-50	-8	-6	-50	0	69	-50	-22	0	-50	-8	13	-50
CA04302_01	CA04302_01	726	1061	0	869	729	0	456	459	0	454	561	0	658	1075	0	298	599	0	336	284	0	367	706	0	334	647	0	591	985	0	40	456	0	654	594	0	519	947	0
CA01245_01	CA01245_01	585	1341	0	856	652	0	440	355	0	364	467	0	599	1012	0	300	662	0	257	248	0	332	534	0	351	698	0	569	978	0	70	611	0	575	604	0	678	1296	0
CA02108_01	CA02108_01	2584	6289	0	6133	2800	0	3591	2196	0	2905	2851	0	4476	7403	0	2431	5776	0	2465	1806	0	3352	4540	0	2954	6342	0	5445	9891	0	501	5926	0	6116	6619	0	6925	12229	0
CA02349_01	CA02349_01	528	1051	0	1059	554	0	442	501	0	352	550	0	563	1010	0	344	829	0	329	260	0	384	718	0	371	789	0	480	1196	0	60	749	0	675	724	0	674	1365	0
CA03035_01	CA03035_01	448	1413	0	1158	853	0	511	330	0	463	569	0	681	1126	0	351	943	0	327	272	0	427	572	0	398	959	0	953	1342	0	79	744	0	725	798	0	916	1476	0
CA04053_01	CA04053_01	-9	23	-50	13	124	-50	-6	26	-50	-3	80	0	-22	51	-50	-5	33	-50	-25	6	-50	-13	3	-50	-2	29	-50	-4	21	-50	-2	41	-50	-18	13	-50	-7	20	-50
CA04302_01	CA04302_01	724	1215	0	913	736	0	510	500	0	516	594	0	548	920	0	279	695	0	341	289	0	411	754	0	374	690	0	575	991	0	64	618	0	758	654	0	654	1144	0
CA10078_01	phosphofructokinase alpha-subunit	861	766	0	808	688	0	168	151	0	262	360	0	0	381	0	501	660	0	385	450	0	560	578	0	591	785	0	415	892	0	67	398	0	207	346	0	357	604	0
CA10060_01	L10A ribosomal protein	30198	37862	0	24568	10756	0	6151	2660	0	9162	10712	0	0	13505	0	11439	22437	0	9534	4742	0	16640	11382	0	15859	23511	0	18364	23457	0	1285	14299	0	6384	9014	0	12985	18686	0
CA10019_01	putative fructose-1,6-bisphosphatase	1393	994	0	1673	2427	0	162	131	0	198	408	0	0	888	0	843	796	0	737	758	0	1032	672	0	1076	1365	0	306	719	0	114	457	0	194	271	0	424	696	0
CA10223_01	hypothetical protein	295	449	0	329	695	0	41	66	0	52	173	0	0	454	0	194	345	0	96	335	0	219	301	0	214	431	0	131	281	0	60	199	0	64	116	0	106	252	0
CA10053_01	endo-1,3-beta-glucanase	31	243	0	54	147	-50	10	49	-50	14	80	0	0	148	0	37	291	0	-2	72	-50	22	84	0	27	108	0	128	104	0	13	72	-50	28	72	0	39	202	0
CA10265_01	transporter family	71	178	0	141	277	0	13	65	0	21	113	0	0	193	0	80	119	0	18	58	-50	53	63	0	59	149	0	43	92	0	8	126	0	22	57	-50	23	109	0
CA10252_01	histidine kinase	520	566	0	853	1655	0	111	186	0	128	245	0	0	621	0	436	557	0	242	945	0	562	884	0	491	777	0	208	565	0	123	344	0	135	225	0	281	503	0
CA10254_01	hypothetical protein	0	26	-50	0	179	-50	0	51	-50	2	68	-50	0	126	0	0	44	-50	-20	21	-50	-10	-1	-50	-14	23	-50	-8	11	-50	12	111	0	-11	38	-50	-7	24	-50
CA10240_01	ribosomal protein L13e	27554	41006	0	41793	23673	0	7733	4056	0	7859	9777	0	0	20661	0	19881	24861	0	13955	3702	0	21387	14631	0	21417	24516	0	17482	23715	0	831	14015	0	8032	9034	0	17373	23017	0
CA10243_01	beta-gluconase	256	598	0	358	3017	0	51	90	0	36	123	0	0	279	0	302	854	0	172	2335	0	311	346	0	312	393	0	417	306	0	274	262	0	82	179	0	189	360	0
CA10246_01	unknown possible membrane protein	229	482	0	396	584	0	59	105	0	31	122	0	0	292	0	168	399	0	86	167	0	235	278	0	181	322	0	194	260	0	44	210	0	118	160	0	177	377	0
CA10231_01	phox domain protein	164	220	0	363	506	0	54	85	0	31	109	0	0	256	0	156	170	0	81	168	0	175	137	0	169	258	0	84	178	0	34	140	0	25	89	-50	102	228	0
CA00218_01	C.albicans ornithine decarboxylase gene.	4378	9135	0	7708	5055	0	1232	873	0	747	1203	0	0	3898	0	5199	8375	0	2656	2525	0	6721	4878	0	4715	8966	0	5506	8499	0	547	3557	0	1785	1916	0	3449	6832	0
CA00223_01	C.albicans POL3 gene.	692	910	0	1117	700	0	227	169	0	127	220	0	0	620	0	558	651	0	327	408	0	599	708	0	571	980	0	387	773	0	80	461	0	234	293	0	403	882	0
CA00360_01	C.albicans sec18 gene.	1400	853	0	2607	1234	0	533	245	0	311	439	0	0	1159	0	1318	778	0	822	1067	0	1627	1162	0	1264	2131	0	396	1830	0	187	1027	0	295	652	0	895	1766	0
CA00362_01	C.albicans gene for TFIIIB (BRF1) subunit.	426	789	0	825	1195	0	156	181	0	106	201	0	0	444	0	364	527	0	284	337	0	454	462	0	394	497	0	336	497	0	68	290	0	152	201	0	313	536	0
CA00241_01	Candida albicans saccharopine dehydrogenase (LYS1) gene, complete	977	1869	0	1960	2277	0	322	218	0	226	376	0	0	796	0	831	1412	0	631	750	0	1240	871	0	828	975	0	891	1071	0	148	648	0	227	439	0	888	1388	0
CA00364_01	Candida albicans integrin-like protein alpha Int1p (alpha INT1)	817	1047	0	1563	491	0	213	179	0	135	275	0	0	660	0	829	762	0	522	281	0	804	935	0	759	1028	0	364	945	0	59	727	0	205	313	0	562	1075	0
CA10142_01	CaSKN1	3103	1278	0	5417	543	0	868	468	0	748	938	0	0	2228	0	3238	1213	0	2996	426	0	3876	2946	0	3076	3618	0	487	3182	0	53	2646	0	645	1058	0	2134	3786	0
CA00372_01	Candida albicans DNA for squalene synthase, complete cds.	1502	2056	0	2804	2350	0	688	425	0	327	591	0	0	1363	0	1679	2378	0	1467	1347	0	1422	1487	0	1468	1985	0	1489	2249	0	335	1704	0	727	938	0	1876	2927	0
CA10187_01	oxidosqualene cyclase	434	428	0	947	1004	0	135	119	0	76	196	0	0	497	0	500	424	0	407	346	0	496	446	0	464	587	0	269	593	0	68	313	0	121	192	0	399	718	0
CA10034_01	corticosteroid-binding protein	262	537	0	588	730	0	82	124	0	27	147	0	0	373	0	335	536	0	254	231	0	356	359	0	292	473	0	522	441	0	43	212	0	112	179	0	284	521	0
CA10027_01	secreted aspartyl proteinase 1	22	39	0	60	375	0	8	49	-50	6	86	0	0	123	0	86	-3	-50	17	107	0	33	64	0	32	84	-50	15	49	-50	20	70	-50	19	61	-50	40	128	0
CA10191_01	phosphoribosyl-amidoimidazole-succinocarboxamide synthetase (ADE1	692	1119	0	1125	536	0	305	178	0	190	288	0	0	608	0	701	1195	0	788	699	0	837	836	0	837	1571	0	776	1000	0	140	659	0	301	378	0	795	1423	0
CA00923_01	CA00923_01	747	1625	0	786	464	0	126	142	0	189	284	0	0	425	0	368	966	0	320	134	0	451	381	0	489	727	0	578	569	0	24	260	0	156	207	0	326	470	0
CA00925_01	CA00925_01	931	1580	0	864	1127	0	202	178	0	287	475	0	0	598	0	455	877	0	374	326	0	602	493	0	686	935	0	739	792	0	59	379	0	174	302	0	350	603	0
CA00927_01	CA00927_01	179	207	0	188	283	0	45	70	0	54	147	0	0	172	0	148	169	0	66	91	0	100	163	0	118	258	0	55	194	0	9	61	-50	42	74	-50	50	176	0
CA00929_01	CA00929_01	2713	4087	0	3021	2381	0	556	485	0	749	1127	0	0	1577	0	1383	1737	0	1324	742	0	1696	1394	0	2019	2533	0	1122	1805	0	130	859	0	450	562	0	852	1374	0
CA00931_01	CA00931_01	400	496	0	725	494	0	85	71	0	131	218	0	0	369	0	501	375	0	224	165	0	343	295	0	382	655	0	172	485	0	20	245	0	68	188	0	223	486	0
CA00933_01	CA00933_01	-10	20	-50	16	152	-50	-4	46	-50	3	71	-50	0	108	0	19	46	0	-25	9	-50	-20	-2	-50	-13	34	-50	-17	1	-50	4	63	-50	-13	37	-50	-13	38	-50
CA00947_01	CA00947_01	124	140	0	250	276	0	25	40	-50	39	116	0	0	215	0	400	205	0	67	77	0	116	60	0	138	224	0	39	153	0	18	111	0	2	69	-50	60	160	0
CA00949_01	CA00949_01	402	736	0	819	583	0	132	101	0	144	224	0	0	491	0	271	424	0	253	171	0	363	395	0	446	731	0	221	529	0	33	326	0	123	230	0	264	553	0
CA00951_01	CA00951_01	7693	7627	0	11913	7162	0	1068	765	0	1671	2168	0	0	5754	0	5129	4535	0	4334	2263	0	5889	4840	0	6566	8011	0	2212	5011	0	280	2480	0	1120	1461	0	2315	3820	0
CA00953_01	CA00953_01	8	34	0	1	37	-50	0	49	-50	3	63	-50	0	116	0	81	54	0	-22	17	-50	-14	21	-50	-9	32	-50	3	29	-50	7	77	-50	-6	51	-50	2	48	-50
CA00954_01	CA00954_01	1856	1311	0	2263	610	0	432	295	0	382	566	0	0	1057	0	1265	1007	0	1062	570	0	1342	1271	0	1390	2006	0	314	1569	0	96	1059	0	381	614	0	815	1680	0
CA00956_01	CA00956_01	22	42	0	86	31	-50	62	140	0	19	103	0	0	203	0	280	141	0	42	44	-50	133	89	0	290	236	0	83	269	0	26	240	0	64	128	0	208	283	0
CA00969_01	CA00969_01	50	127	0	112	62	-50	6	55	-50	-3	86	0	0	146	0	1152	432	0	25	77	-50	78	107	0	99	180	0	46	57	-50	27	83	0	31	80	0	44	135	0
CA00971_01	CA00971_01	531	699	0	902	1172	0	179	168	0	183	279	0	0	502	0	384	451	0	400	478	0	440	365	0	500	686	0	227	497	0	85	334	0	122	222	0	241	452	0
CA00973_01	CA00973_01	999	2344	0	1711	732	0	301	266	0	276	435	0	0	905	0	909	1412	0	686	222	0	858	950	0	1025	1503	0	978	1152	0	60	741	0	366	393	0	803	1212	0
CA00975_01	CA00975_01	639	729	0	1170	620	0	202	170	0	204	332	0	0	582	0	628	498	0	450	326	0	678	575	0	603	819	0	262	715	0	72	493	0	139	252	0	459	836	0
CA00977_01	CA00977_01	2592	1643	0	4662	1609	0	732	295	0	741	854	0	0	2126	0	3655	1252	0	3050	342	0	4337	1243	0	3843	2574	0	742	3687	0	84	2121	0	360	1069	0	2140	4007	0
CA00979_01	CA00979_01	115	179	0	211	320	0	27	74	0	15	99	0	0	188	0	272	112	0	68	107	0	103	123	0	102	178	0	39	86	-50	19	113	-50	9	56	-50	51	114	0
CA00993_01	CA00993_01	83	240	0	119	299	0	25	93	0	30	111	0	0	166	0	438	226	0	54	72	0	96	87	0	91	163	0	65	102	0	8	128	0	9	61	-50	64	135	0
CA00995_01	CA00995_01	321	849	0	402	319	0	93	116	0	69	236	0	0	323	0	445	618	0	262	99	0	207	177	0	252	424	0	302	300	0	20	281	0	78	123	0	262	434	0
CA00997_01	CA00997_01	62	80	0	232	329	0	6	48	-50	2	63	-50	0	162	0	205	71	0	27	114	-50	28	70	-50	21	112	-50	-3	27	-50	13	59	-50	-2	51	-50	9	81	-50
CA00999_01	CA00999_01	60470	65164	0	65361	32006	0	22846	11113	0	25148	29278	0	0	45265	0	50494	54714	0	64039	11578	0	61568	29946	0	62750	55476	0	48484	53606	0	3712	44903	0	15093	20389	0	54267	58855	0
CA01001_01	CA01001_01	494	665	0	840	350	0	136	189	0	145	224	0	0	494	0	676	678	0	537	247	0	446	885	0	503	994	0	300	675	0	35	417	0	300	257	0	360	711	0
CA01003_01	CA01003_01	1364	2743	0	1937	1020	0	452	420	0	471	728	0	0	1041	0	1097	2145	0	1350	512	0	1522	1688	0	1302	2149	0	1429	1800	0	106	1246	0	496	552	0	1128	2161	0
CA01286_01	CA01286_01	3415	3335	0	3454	7928	0	783	622	0	1081	1340	0	0	1812	0	1656	2112	0	1668	2009	0	1974	1674	0	2491	2637	0	1240	1756	0	290	969	0	582	793	0	1186	1824	0
CA01288_01	CA01288_01	72	106	0	70	514	0	4	128	0	20	176	0	0	153	0	31	101	0	-6	108	-50	15	70	-50	41	128	0	25	115	0	11	57	-50	4	85	-50	15	91	-50
CA01290_01	CA01290_01	499	326	0	561	509	0	105	94	0	136	232	0	0	328	0	237	251	0	178	182	0	229	136	0	308	582	0	96	365	0	19	192	0	45	154	0	174	378	0
CA01292_01	CA01292_01	455	727	0	593	1148	0	103	138	0	170	293	0	0	379	0	228	457	0	221	363	0	240	315	0	382	612	0	182	361	0	51	173	0	106	164	0	200	407	0
CA01294_01	CA01294_01	10	31	0	30	202	0	2	40	-50	6	79	-50	0	122	0	103	93	0	-18	21	-50	5	34	-50	10	58	-50	-5	30	-50	7	55	-50	5	45	-50	-2	61	-50
CA01296_01	CA01296_01	231	490	0	395	658	0	84	119	0	111	209	0	0	319	0	203	322	0	142	165	0	191	206	0	290	420	0	127	232	0	31	179	0	66	148	0	153	304	0
CA01309_01	CA01309_01	628	1026	0	1126	1491	0	183	141	0	268	357	0	0	710	0	601	760	0	511	660	0	649	536	0	784	1072	0	293	656	0	77	336	0	108	233	0	305	531	0
CA01311_01	CA01311_01	132	142	0	350	368	0	63	104	0	62	169	0	0	284	0	177	195	0	115	100	0	150	184	0	216	431	0	22	231	0	20	196	0	58	138	0	125	315	0
CA01313_01	CA01313_01	2342	2606	0	3550	4588	0	1883	1932	0	1531	2315	0	0	4659	0	3675	2697	0	2151	1413	0	4114	3489	0	6778	7336	0	3134	5356	0	1195	4168	0	3818	3239	0	4019	5567	0
CA01315_01	CA01315_01	296	509	0	509	483	0	88	117	0	99	209	0	0	335	0	388	385	0	216	111	0	261	242	0	334	415	0	132	259	0	18	242	0	79	157	0	187	408	0
CA01317_01	CA01317_01	1302	928	0	1916	1078	0	337	219	0	318	470	0	0	825	0	958	668	0	716	486	0	900	641	0	1027	1382	0	278	1101	0	77	663	0	214	435	0	451	926	0
CA01319_01	CA01319_01	241	614	0	448	792	0	94	99	0	98	199	0	0	304	0	262	390	0	180	171	0	203	153	0	257	364	0	202	292	0	41	223	0	64	154	0	157	324	0
CA01332_01	CA01332_01	7	45	0	13	52	-50	8	53	-50	10	68	-50	0	115	-50	22	60	-50	-8	40	-50	3	47	-50	4	65	-50	-6	29	-50	6	88	-50	-3	44	-50	-6	55	-50
CA01334_01	CA01334_01	1625	3267	0	3280	2632	0	504	344	0	558	960	0	0	1671	0	1630	1952	0	1278	526	0	1690	1151	0	1939	2500	0	1226	1912	0	155	1262	0	468	732	0	1334	2045	0
CA01336_01	CA01336_01	14	48	0	20	166	-50	8	64	-50	5	64	-50	0	155	0	31	54	-50	-2	97	-50	3	26	-50	8	49	-50	-8	20	-50	12	55	-50	-20	42	-50	0	71	-50
CA01338_01	CA01338_01	6	43	-50	2	42	-50	3	52	-50	-1	74	-50	0	98	0	10	32	-50	-15	17	-50	-13	10	-50	-6	44	-50	-11	29	-50	-2	66	-50	-12	37	-50	-7	53	-50
CA01340_01	CA01340_01	8	45	0	26	158	-50	5	64	-50	4	74	-50	0	134	0	18	41	-50	-5	85	-50	1	32	-50	11	75	-50	-5	47	-50	11	75	-50	3	59	-50	3	71	-50
CA01342_01	CA01342_01	398	374	0	678	561	0	127	120	0	130	225	0	0	407	0	1111	487	0	282	293	0	472	318	0	471	649	0	118	416	0	71	443	0	79	206	0	361	747	0
CA01356_01	CA01356_01	-1	30	-50	3	68	-50	0	50	-50	-2	71	-50	0	89	0	223	70	0	-15	12	-50	-9	12	-50	4	36	-50	-22	3	-50	-5	38	-50	-22	45	-50	-11	29	-50
CA01358_01	CA01358_01	393	481	0	623	470	0	113	102	0	90	222	0	0	385	0	644	370	0	264	168	0	282	244	0	301	519	0	190	482	0	30	321	0	84	191	0	234	534	0
CA01360_01	CA01360_01	1394	2533	0	2565	594	0	422	283	0	489	624	0	0	1177	0	2236	3306	0	1393	302	0	1409	1825	0	1426	2498	0	1443	2046	0	56	1359	0	504	544	0	1328	2146	0
CA01362_01	CA01362_01	436	704	0	659	1230	0	174	161	0	195	339	0	0	441	0	440	606	0	509	497	0	466	388	0	505	662	0	409	566	0	82	427	0	79	204	0	395	671	0
CA01364_01	CA01364_01	-12	44	-50	18	236	-50	0	79	0	-3	85	-50	0	110	0	64	33	-50	-21	15	-50	-19	26	-50	-12	49	-50	-23	26	-50	-4	56	-50	-31	48	-50	-15	55	-50
CA01366_01	CA01366_01	-7	28	-50	16	154	-50	1	47	-50	-12	66	-50	0	117	0	61	26	-50	-14	27	-50	-19	18	-50	-4	41	-50	-18	4	-50	-2	54	-50	-33	14	-50	1	70	-50
CA01656_01	CA01656_01	1909	2780	0	2144	1524	0	446	361	0	497	595	0	0	1121	0	815	1647	0	686	596	0	966	1337	0	1105	1983	0	913	1295	0	106	699	0	531	516	0	722	1290	0
CA01658_01	CA01658_01	5951	5875	0	6995	3501	0	1836	937	0	1687	1147	0	0	3555	0	2943	6292	0	2735	4310	0	3045	4743	0	4257	8724	0	2255	4766	0	794	2727	0	2171	2098	0	2290	4765	0
CA01660_01	CA01660_01	-4	23	-50	18	239	-50	-1	66	0	-2	88	0	0	127	0	9	55	-50	-31	17	-50	-16	28	-50	-12	39	-50	-5	27	-50	1	23	-50	-10	50	-50	-13	35	-50
CA01662_01	CA01662_01	4240	7130	0	5931	4151	0	778	616	0	1541	1983	0	0	2595	0	2062	3055	0	2241	873	0	2437	2087	0	3852	4784	0	2340	3242	0	96	1271	0	871	1081	0	1706	2797	0
CA01664_01	CA01664_01	99	203	0	209	275	0	30	61	0	51	144	0	0	189	0	72	140	0	40	64	-50	70	60	-50	102	223	0	46	140	0	11	103	-50	7	79	-50	57	158	0
CA01666_01	CA01666_01	-6	3	-50	8	136	-50	-4	33	-50	-2	56	-50	0	122	0	12	50	-50	-37	-1	-50	-20	-5	-50	-14	39	-50	-5	13	-50	4	55	-50	-15	47	-50	-10	28	-50
CA01679_01	CA01679_01	10	92	0	48	142	0	7	64	-50	11	97	0	0	131	0	31	104	0	-8	24	-50	0	47	-50	9	80	-50	4	45	-50	6	62	-50	-9	57	-50	-3	70	-50
CA01681_01	CA01681_01	376	541	0	1015	533	0	184	204	0	206	295	0	0	601	0	514	582	0	493	249	0	492	599	0	686	1123	0	257	796	0	40	497	0	222	316	0	390	881	0
CA01683_01	CA01683_01	463	202	0	718	425	0	126	87	0	128	213	0	0	484	0	344	191	0	247	257	0	310	163	0	377	673	0	40	399	0	39	302	0	36	193	0	237	532	0
CA01685_01	CA01685_01	105	184	0	265	239	0	25	70	0	52	134	0	0	217	0	196	206	0	83	112	0	104	95	0	145	236	0	36	78	0	23	125	0	9	65	-50	68	213	0
CA01687_01	CA01687_01	312	401	0	428	822	0	86	126	0	110	199	0	0	336	0	356	385	0	175	296	0	196	237	0	260	395	0	136	310	0	51	252	0	86	146	0	149	315	0
CA01689_01	CA01689_01	-14	17	-50	-8	117	-50	-4	45	-50	0	70	-50	0	86	0	795	184	0	-14	17	-50	10	10	-50	7	58	-50	-5	-3	-50	12	107	-50	8	43	-50	-2	46	-50
CA01702_01	CA01702_01	293	586	0	608	673	0	120	126	0	157	267	0	0	478	0	324	503	0	219	190	0	337	317	0	345	610	0	268	473	0	36	318	0	113	210	0	277	602	0
CA01704_01	CA01704_01	217	443	0	426	538	0	70	103	0	71	194	0	0	356	0	567	399	0	145	134	0	207	205	0	231	373	0	130	231	0	34	209	0	49	126	0	181	349	0
CA00445_01	CA00445_01	1	29	0	4	58	-50	3	48	-50	-2	64	-50	0	65	-50	157	59	0	3	22	-50	-2	25	-50	-7	36	-50	-11	15	-50	4	60	-50	-9	48	-50	-3	60	-50
CA01706_01	CA01706_01	473	847	0	723	713	0	216	173	0	241	355	0	0	501	0	388	596	0	381	379	0	467	407	0	510	855	0	374	664	0	87	520	0	118	276	0	458	794	0
CA01708_01	CA01708_01	-11	33	-50	15	222	0	-2	76	0	-1	81	0	0	153	0	108	71	0	-21	44	-50	-24	36	-50	-13	67	-50	-25	36	-50	-4	118	-50	-16	68	-50	-20	83	-50
CA01710_01	CA01710_01	2179	3300	0	3309	2683	0	759	731	0	927	1436	0	0	2045	0	1964	2033	0	1956	704	0	2439	1995	0	2638	3197	0	1128	2139	0	177	1876	0	630	861	0	2205	3131	0
CA01724_01	CA01724_01	401	701	0	913	660	0	140	181	0	147	308	0	0	595	0	1179	814	0	280	272	0	449	650	0	464	819	0	353	666	0	75	612	0	165	296	0	464	899	0
CA01726_01	CA01726_01	10	61	0	175	429	0	2	102	0	-10	155	0	0	182	0	108	109	0	-3	126	-50	3	49	-50	-2	90	-50	-18	42	-50	9	80	-50	-9	60	-50	-6	72	-50
CA01728_01	CA01728_01	5250	2592	0	8625	2217	0	1546	1344	0	2261	4390	0	0	4388	0	4750	5931	0	5527	947	0	5059	4980	0	4961	7723	0	1242	7435	0	107	4848	0	1465	2035	0	3131	7529	0
CA01730_01	CA01730_01	634	451	0	842	539	0	200	139	0	246	372	0	0	584	0	540	489	0	634	475	0	573	426	0	533	1004	0	175	704	0	60	492	0	82	254	0	478	886	0
CA01732_01	CA01732_01	2398	4060	0	3176	3760	0	723	502	0	992	1169	0	0	1526	0	2090	3594	0	2942	1525	0	2413	1730	0	2552	3535	0	2192	2827	0	262	1966	0	597	985	0	2063	3188	0
CA01734_01	CA01734_01	32072	35612	0	47141	17307	0	9224	4152	0	10410	12127	0	0	23005	0	27305	40080	0	22468	15227	0	32445	24344	0	30215	44306	0	23346	35614	0	3021	26761	0	8759	12876	0	25950	37504	0
CA02025_01	CA02025_01	823	1155	0	909	849	0	206	165	0	221	408	0	0	551	0	387	626	0	324	215	0	470	381	0	519	794	0	397	629	0	38	358	0	175	334	0	381	711	0
CA02027_01	CA02027_01	1226	1857	0	2159	2300	0	455	443	0	515	581	0	0	1209	0	903	1396	0	801	1244	0	971	1495	0	1241	2075	0	543	1550	0	202	932	0	628	727	0	753	1554	0
CA02029_01	CA02029_01	82	208	0	172	524	0	13	58	0	43	130	0	0	197	0	78	212	0	25	210	0	69	121	0	94	235	0	67	147	0	25	92	-50	19	81	-50	41	150	0
CA00506_01	CA00506_01	0	26	-50	38	288	0	-1	52	-50	-4	88	-50	0	124	0	13	66	-50	-29	29	-50	-11	24	-50	-9	60	-50	-6	26	-50	4	79	-50	-17	53	-50	-5	59	-50
CA02032_01	CA02032_01	-1	24	-50	26	215	0	1	63	0	10	93	0	0	111	0	2	35	0	-21	16	-50	-16	3	-50	-4	50	-50	-3	38	-50	8	93	0	3	55	-50	-1	61	-50
CA02034_01	CA02034_01	2	44	0	31	248	0	9	83	0	3	112	0	0	168	0	8	57	-50	-25	12	-50	-17	-1	-50	-9	46	-50	-10	25	-50	8	64	0	-24	60	-50	-10	50	-50
CA02048_01	CA02048_01	494	278	0	606	917	0	107	108	0	158	269	0	0	463	0	300	218	0	235	341	0	330	243	0	400	570	0	81	358	0	45	248	0	46	168	0	233	426	0
CA02050_01	CA02050_01	29	93	0	38	405	0	59	169	0	65	179	0	0	292	0	471	303	0	9	30	-50	47	100	0	112	210	0	11	167	0	19	153	0	108	160	0	59	198	0
CA02052_01	CA02052_01	0	34	-50	3	176	-50	2	63	-50	1	69	-50	0	107	0	10	55	-50	-14	58	-50	-16	13	-50	-3	48	-50	-7	20	-50	12	93	-50	-14	45	-50	-8	69	-50
CA02054_01	CA02054_01	29	30	0	121	265	-50	9	23	-50	19	42	-50	0	42	-50	57	131	0	224	259	0	29	69	-50	90	214	0	41	106	-50	69	307	0	27	47	-50	16	70	-50
CA02056_01	CA02056_01	16	42	0	58	117	-50	39	88	0	22	117	0	0	182	0	153	151	0	12	58	-50	72	69	0	49	178	0	27	178	0	43	244	0	31	121	0	67	183	0
CA02058_01	CA02058_01	120	358	0	237	173	-50	51	91	0	66	170	0	0	258	0	177	314	0	83	116	0	128	162	0	141	288	0	110	164	0	24	188	0	43	76	0	104	283	0
CA02072_01	CA02072_01	288	187	0	618	316	0	107	69	0	149	245	0	0	415	0	325	174	0	193	144	0	302	122	0	339	555	0	48	330	0	24	251	0	27	151	0	309	510	0
CA02074_01	CA02074_01	94	205	0	218	176	0	42	78	0	33	130	0	0	218	0	163	183	0	61	64	0	116	139	0	118	236	0	88	187	0	14	178	0	35	112	0	92	261	0
CA02076_01	CA02076_01	-20	9	-50	-16	85	-50	-5	50	-50	-9	63	-50	0	70	0	0	21	-50	-25	5	-50	-27	7	-50	-16	23	-50	-21	-13	-50	-4	45	-50	-20	35	-50	-19	26	-50
CA02078_01	CA02078_01	3995	6529	0	7977	3483	0	1544	1066	0	1986	2143	0	0	4145	0	4818	7899	0	5204	5248	0	5543	7523	0	6534	9118	0	3323	5799	0	822	3575	0	2478	2070	0	3727	5709	0
CA02080_01	CA02080_01	453	519	0	714	543	0	180	140	0	188	248	0	0	498	0	492	645	0	410	624	0	498	552	0	507	869	0	186	692	0	89	466	0	128	239	0	370	715	0
CA02081_01	CA02081_01	-11	24	-50	1	103	-50	-9	42	-50	-6	59	-50	0	79	-50	58	52	0	-20	8	-50	-26	3	-50	-15	37	-50	-21	17	-50	-6	51	-50	-24	33	-50	-18	73	-50
CA02095_01	CA02095_01	817	1685	0	1441	705	0	363	275	0	404	504	0	0	874	0	729	1205	0	562	319	0	745	727	0	878	1514	0	634	1206	0	82	1045	0	368	526	0	816	1632	0
CA02097_01	CA02097_01	1124	840	0	2042	1125	0	468	225	0	316	487	0	0	1053	0	920	931	0	960	1098	0	927	689	0	1078	1886	0	536	1507	0	271	1157	0	256	568	0	986	1788	0
CA02099_01	CA02099_01	730	485	0	1213	496	0	215	161	0	289	409	0	0	741	0	843	500	0	649	345	0	738	600	0	754	1243	0	223	1153	0	59	643	0	158	339	0	587	1160	0
CA02101_01	CA02101_01	0	18	-50	18	99	-50	-2	50	-50	-5	51	-50	0	112	0	34	31	-50	-17	27	-50	-10	25	-50	-7	44	-50	-25	3	-50	-1	25	-50	-26	36	-50	-7	35	-50
CA02103_01	CA02103_01	-14	8	-50	10	131	-50	-7	32	-50	-8	57	-50	0	78	-50	215	59	0	-29	12	-50	-16	10	-50	-10	26	-50	-23	-12	-50	-9	25	-50	-35	23	-50	-26	17	-50
CA02105_01	CA02105_01	7232	13873	0	11805	7147	0	2277	1063	0	2322	3106	0	0	6332	0	8318	11015	0	6051	3230	0	8075	5498	0	8059	11588	0	7244	9840	0	991	7378	0	1925	3168	0	5909	9362	0
CA02385_01	CA02385_01	322	228	0	431	454	0	103	113	0	96	209	0	0	375	0	228	206	0	122	124	0	204	199	0	240	675	0	45	392	0	23	245	0	56	206	0	166	451	0
CA02387_01	CA02387_01	78	126	0	60	362	0	68	102	0	88	138	0	0	259	0	875	539	0	33	129	0	87	159	0	180	286	0	40	160	0	72	144	0	164	195	0	83	234	0
CA02389_01	CA02389_01	-3	27	0	26	197	-50	-4	43	-50	4	63	-50	0	99	0	23	56	-50	-21	26	-50	-17	14	-50	-7	51	-50	-5	17	-50	6	60	-50	-6	48	-50	-4	58	-50
CA02391_01	CA02391_01	714	505	0	1401	1811	0	273	180	0	373	464	0	0	888	0	710	438	0	678	660	0	747	502	0	1012	1284	0	215	1232	0	81	566	0	222	482	0	600	1132	0
CA02393_01	CA02393_01	206	401	0	282	396	0	69	91	0	92	185	0	0	302	0	130	283	0	66	70	0	122	150	0	172	336	0	130	206	0	10	167	0	47	114	0	135	292	0
CA02395_01	CA02395_01	-7	11	-50	19	238	0	-8	9	-50	-3	61	-50	0	114	0	94	81	0	-20	18	-50	-19	27	-50	-7	46	-50	-2	-3	-50	9	77	-50	-9	45	-50	-11	56	-50
CA02408_01	CA02408_01	769	2012	0	1262	534	0	214	182	0	271	438	0	0	797	0	526	1521	0	394	151	0	581	599	0	669	1387	0	600	780	0	23	523	0	222	346	0	442	741	0
CA02410_01	CA02410_01	-12	15	-50	-2	122	-50	-4	49	-50	-1	67	-50	0	88	-50	11	53	-50	-27	21	-50	-27	-5	-50	-17	24	-50	-13	29	-50	4	69	-50	-20	42	-50	-20	30	-50
CA02412_01	CA02412_01	-3	25	-50	6	146	-50	4	112	0	-1	117	0	0	157	0	4	70	-50	-13	46	-50	-19	39	-50	-6	61	-50	-6	41	-50	2	92	-50	-11	47	-50	-5	74	-50
CA02414_01	CA02414_01	1897	1968	0	3592	2823	0	930	401	0	839	790	0	0	1953	0	1975	2039	0	1792	3110	0	2020	1589	0	2407	3421	0	812	2274	0	444	1468	0	608	1148	0	1723	2917	0
CA02416_01	CA02416_01	463	1112	0	843	747	0	216	183	0	208	335	0	0	600	0	449	1036	0	319	373	0	465	494	0	492	781	0	547	653	0	94	468	0	221	312	0	412	739	0
CA02418_01	CA02418_01	783	856	0	1600	1023	0	327	189	0	409	449	0	0	807	0	863	820	0	695	799	0	856	724	0	936	1383	0	338	976	0	145	705	0	254	482	0	699	1208	0
CA02431_01	CA02431_01	1245	1112	0	2551	1565	0	417	278	0	504	744	0	0	1181	0	1374	1181	0	1041	1054	0	1378	1098	0	1359	2013	0	442	1618	0	148	1001	0	278	551	0	1137	1979	0
CA02433_01	CA02433_01	27	42	0	70	68	-50	10	45	-50	16	94	0	0	125	0	241	151	0	23	60	-50	37	78	-50	46	127	0	-4	72	-50	8	123	-50	14	42	-50	77	148	0
CA02435_01	CA02435_01	2309	6800	0	4143	1385	0	1032	655	0	1220	1241	0	0	2458	0	1817	5202	0	1736	1131	0	2197	2800	0	2146	4421	0	2497	2644	0	234	2010	0	994	1087	0	2400	3729	0
CA02437_01	CA02437_01	22	50	0	74	217	-50	5	45	-50	14	94	0	0	149	0	115	76	0	14	44	-50	24	33	-50	27	81	-50	13	29	-50	4	66	-50	-22	39	-50	13	69	-50
CA02439_01	CA02439_01	-13	11	-50	4	153	-50	-7	47	-50	-1	72	0	0	93	0	5	35	-50	-18	9	-50	-26	-7	-50	-16	26	-50	-24	-17	-50	-4	33	-50	-28	38	-50	-16	24	-50
CA02441_01	CA02441_01	-9	34	0	-4	283	0	-13	73	-50	2	165	0	0	165	0	3	35	-50	-19	35	-50	-24	9	-50	-15	44	-50	-18	17	-50	-4	48	-50	-25	55	-50	-25	31	-50
CA02453_01	CA02453_01	167	210	0	320	439	0	57	90	0	66	123	0	0	256	0	452	258	0	121	266	0	159	218	0	156	340	0	59	220	0	47	221	0	49	124	0	122	369	0
CA02455_01	CA02455_01	4992	6043	0	6940	7587	0	1473	572	0	1147	1646	0	0	3507	0	4460	7195	0	4345	6898	0	5214	3608	0	5497	7689	0	4273	6467	0	1115	4335	0	1341	2179	0	3888	7201	0
CA02457_01	CA02457_01	301	255	0	360	372	0	64	90	0	82	151	0	0	271	0	235	221	0	172	224	0	200	253	0	208	370	0	96	305	0	37	181	0	64	128	0	104	264	0
CA02459_01	CA02459_01	352	195	0	451	409	0	84	95	0	112	187	0	0	335	0	346	161	0	263	350	0	288	210	0	277	409	0	60	324	0	47	230	0	47	133	0	193	361	0
CA02461_01	CA02461_01	630	680	0	726	710	0	182	168	0	225	324	0	0	497	0	459	646	0	560	565	0	593	650	0	627	795	0	352	655	0	97	546	0	145	257	0	489	871	0
CA02463_01	CA02463_01	687	451	0	823	1101	0	194	158	0	191	311	0	0	538	0	578	311	0	475	405	0	679	436	0	677	688	0	133	565	0	80	482	0	101	243	0	343	718	0
CA02748_01	CA02748_01	90	171	0	151	344	0	43	111	0	45	166	0	0	211	0	83	159	0	49	122	0	70	129	0	81	242	0	56	241	0	24	195	0	31	169	0	80	262	0
CA02750_01	CA02750_01	476	591	0	915	639	0	199	180	0	222	356	0	0	644	0	423	505	0	335	357	0	530	806	0	608	1033	0	271	1003	0	32	480	0	232	437	0	470	952	0
CA02752_01	CA02752_01	-3	29	-50	24	442	0	7	42	-50	8	68	-50	0	113	0	89	82	0	-5	41	-50	5	33	-50	44	90	0	28	27	-50	24	103	0	23	58	-50	18	88	-50
CA02754_01	CA02754_01	4859	10041	0	8060	4456	0	1896	1042	0	2180	2655	0	0	4792	0	3545	7015	0	3148	2191	0	3953	3609	0	5208	8903	0	4221	5307	0	258	2546	0	2063	2489	0	3227	4781	0
CA02756_01	CA02756_01	326	733	0	562	652	0	97	121	0	227	333	0	0	484	0	260	402	0	207	120	0	250	311	0	305	465	0	227	423	0	23	303	0	167	252	0	247	401	0
CA02758_01	CA02758_01	1272	2461	0	2004	1437	0	368	366	0	469	721	0	0	1501	0	1056	2107	0	947	844	0	1039	1360	0	1327	2431	0	934	1709	0	82	1029	0	438	770	0	947	1911	0
CA02772_01	CA02772_01	1319	1322	0	2300	1915	0	415	271	0	575	623	0	0	1363	0	1315	1134	0	953	1059	0	1098	1284	0	1367	1941	0	389	1414	0	143	926	0	422	622	0	881	1645	0
CA02774_01	CA02774_01	-11	19	-50	11	129	-50	2	37	-50	2	67	-50	0	88	-50	8	44	-50	-20	18	-50	-27	2	-50	-11	28	-50	-12	-1	-50	3	70	-50	-25	46	-50	-14	29	-50
CA02776_01	CA02776_01	198	309	0	358	519	0	72	92	0	54	176	0	0	286	0	151	221	0	105	145	0	155	162	0	188	284	0	105	194	0	28	209	0	51	103	0	137	255	0
CA02778_01	CA02778_01	657	700	0	1069	1157	0	275	248	0	344	420	0	0	781	0	565	622	0	577	482	0	609	813	0	693	1028	0	363	1068	0	103	634	0	331	474	0	565	1041	0
CA02780_01	CA02780_01	920	888	0	1262	1240	0	301	266	0	264	322	0	0	739	0	724	1062	0	611	1162	0	643	1013	0	771	1223	0	294	920	0	181	594	0	358	425	0	608	1146	0
CA02782_01	CA02782_01	106	246	0	262	349	0	50	95	0	42	144	0	0	218	0	321	228	0	54	87	-50	81	120	0	101	212	0	58	108	-50	22	115	-50	33	73	-50	84	198	0
CA02796_01	CA02796_01	4	63	0	40	55	-50	32	92	0	22	123	0	0	157	0	97	99	0	11	54	-50	48	31	-50	31	113	0	26	60	-50	11	108	0	1	59	-50	32	111	-50
CA02798_01	CA02798_01	189	493	0	508	851	0	66	110	0	76	199	0	0	399	0	367	669	0	154	316	0	297	328	0	275	518	0	178	264	0	67	246	0	89	128	0	195	400	0
CA02800_01	CA02800_01	382	318	0	765	396	0	164	131	0	209	296	0	0	501	0	549	306	0	352	190	0	471	427	0	515	677	0	143	594	0	46	475	0	153	263	0	393	676	0
CA02802_01	CA02802_01	156	167	0	334	258	0	51	94	0	68	147	0	0	303	0	447	242	0	100	104	0	173	246	0	188	345	0	57	284	0	24	261	0	66	152	0	161	372	0
CA02804_01	CA02804_01	112	268	0	209	359	0	57	86	0	71	155	0	0	214	0	225	222	0	102	71	0	115	88	0	116	212	0	106	169	0	17	166	0	29	100	0	118	233	0
CA02806_01	CA02806_01	-3	24	-50	43	143	-50	7	43	-50	3	58	-50	0	124	0	288	108	0	-3	35	-50	-1	24	-50	8	72	-50	14	12	-50	9	63	-50	-14	34	-50	6	60	-50
CA02818_01	CA02818_01	743	1215	0	971	600	0	294	221	0	299	461	0	0	702	0	584	884	0	475	323	0	669	567	0	644	1003	0	406	781	0	67	616	0	215	337	0	587	1040	0
CA02820_01	CA02820_01	63	93	0	90	97	-50	13	46	-50	3	54	-50	0	128	0	252	227	0	18	17	-50	37	99	-50	28	25	-50	64	71	-50	2	99	-50	62	54	-50	-7	120	-50
CA02822_01	CA02822_01	196	249	0	236	606	0	48	97	0	76	212	0	0	301	0	156	237	0	109	209	0	124	165	0	150	322	0	144	218	0	49	244	0	50	114	0	163	287	0
CA00541_01	CA00541_01	296	256	0	381	384	0	85	106	0	113	188	0	0	321	0	289	216	0	253	276	0	281	289	0	286	402	0	120	383	0	48	322	0	91	157	0	203	449	0
CA02825_01	CA02825_01	-12	3	-50	6	124	-50	-6	36	-50	-9	60	-50	0	82	0	159	48	0	-26	9	-50	-18	15	-50	-13	35	-50	-25	-4	-50	0	24	-50	-38	17	-50	-23	27	-50
CA02827_01	CA02827_01	604	1098	0	737	892	0	215	164	0	214	318	0	0	515	0	485	874	0	456	672	0	545	571	0	543	953	0	514	588	0	148	570	0	213	246	0	473	867	0
CA03110_01	CA03110_01	2714	4331	0	4431	2390	0	1038	616	0	1144	1384	0	0	2548	0	1882	2780	0	1475	941	0	2153	2368	0	2552	3481	0	1562	2987	0	134	1597	0	1142	1316	0	2021	3215	0
CA03112_01	CA03112_01	-10	31	-50	32	312	0	-3	72	-50	5	155	0	0	175	0	9	106	0	-20	58	-50	-20	32	-50	-13	65	-50	-8	68	-50	5	181	0	-26	106	-50	-17	102	-50
CA03114_01	CA03114_01	303	677	0	569	801	0	104	96	0	136	220	0	0	383	0	277	496	0	174	269	0	266	251	0	329	503	0	204	325	0	32	249	0	117	197	0	184	356	0
CA03116_01	CA03116_01	-9	4	-50	11	174	-50	-12	15	-50	-7	47	-50	0	53	-50	44	44	0	-25	4	-50	1	26	-50	-12	19	-50	-5	5	-50	-2	59	-50	-27	12	-50	-18	18	-50
CA03118_01	CA03118_01	693	766	0	1082	771	0	142	104	0	230	279	0	0	765	0	468	765	0	398	640	0	496	511	0	576	1120	0	255	663	0	68	441	0	158	324	0	320	618	0
CA03120_01	CA03120_01	182	278	0	334	396	0	46	49	0	88	183	0	0	327	0	163	204	0	111	122	0	159	107	0	204	326	0	65	234	0	14	211	0	35	116	-50	161	328	0
CA03133_01	CA03133_01	113	217	0	266	532	0	30	89	0	47	164	0	0	274	0	111	235	0	44	228	0	79	166	0	106	289	0	50	157	0	31	175	0	23	92	-50	71	186	0
CA03135_01	CA03135_01	243	536	0	499	358	0	123	128	0	98	211	0	0	413	0	263	395	0	219	155	0	272	292	0	350	563	0	194	378	0	40	396	0	158	230	0	285	546	0
CA03137_01	CA03137_01	662	1128	0	1313	598	0	270	293	0	178	420	0	0	879	0	534	980	0	408	269	0	631	1100	0	624	1283	0	519	978	0	55	674	0	521	468	0	600	1177	0
CA03139_01	CA03139_01	149	252	0	272	284	0	69	64	0	49	124	0	0	261	0	162	179	0	91	91	0	118	115	0	171	280	0	76	199	0	28	251	0	51	109	-50	143	314	0
CA00556_01	CA00556_01	-19	12	-50	0	55	-50	-3	26	-50	-3	49	-50	0	67	0	2	33	-50	-22	4	-50	-30	8	-50	-13	20	-50	-22	-16	-50	2	34	-50	-25	28	-50	-16	22	-50
CA03142_01	CA03142_01	-12	16	-50	-6	58	-50	-6	37	-50	1	79	0	0	64	-50	0	36	-50	-16	19	-50	-24	-11	-50	-10	16	-50	-24	-26	-50	-5	28	-50	-21	22	-50	-11	33	-50
CA03155_01	CA03155_01	576	1021	0	1247	1122	0	240	189	0	175	350	0	0	890	0	643	793	0	428	349	0	701	512	0	709	926	0	412	786	0	68	512	0	164	344	0	478	887	0
CA03156_01	CA03156_01	-16	11	-50	-17	28	-50	-6	35	-50	-1	52	-50	0	65	-50	106	69	0	-22	7	-50	-28	-8	-50	-15	13	-50	-21	55	-50	-2	37	-50	-32	15	-50	0	32	-50
CA03158_01	CA03158_01	105	153	0	214	171	0	30	74	0	47	149	0	0	226	0	132	187	0	56	165	0	110	135	0	115	235	0	12	63	0	19	119	0	17	90	-50	64	202	0
CA03160_01	CA03160_01	-8	14	-50	-7	71	-50	-3	41	-50	-4	62	-50	0	63	-50	6	37	-50	-18	20	-50	-26	-3	-50	-10	21	-50	-28	0	-50	-4	25	-50	-30	27	-50	-8	41	-50
CA03162_01	CA03162_01	249	371	0	457	414	0	132	96	0	166	259	0	0	341	0	282	326	0	186	134	0	223	192	0	283	525	0	188	377	0	29	300	0	72	220	0	243	523	0
CA03164_01	CA03164_01	-7	10	-50	10	99	-50	2	42	-50	-3	56	-50	0	65	-50	10	21	-50	-12	28	-50	-14	1	-50	-9	23	-50	-22	-17	-50	-1	37	-50	-24	29	-50	-17	27	-50
CA03177_01	CA03177_01	274	375	0	477	665	0	99	99	0	106	225	0	0	295	0	229	320	0	169	308	0	167	198	0	207	368	0	131	220	0	47	227	0	58	130	0	178	329	0
CA03178_01	CA03178_01	65	65	0	85	143	-50	14	51	-50	10	112	0	0	117	0	79	79	0	19	80	-50	35	74	0	22	109	0	5	59	-50	10	79	-50	-6	47	-50	33	162	0
CA03180_01	CA03180_01	313	283	0	376	369	0	88	87	0	93	207	0	0	306	0	257	307	0	169	176	0	228	217	0	207	447	0	95	376	0	30	336	0	59	194	0	174	422	0
CA03182_01	CA03182_01	70	49	0	15	162	-50	7	45	-50	-1	63	-50	0	109	0	15	21	-50	-5	20	-50	-6	16	-50	-8	39	-50	-12	5	-50	-5	35	-50	-27	23	-50	-21	32	-50
CA03184_01	CA03184_01	2066	2227	0	2355	4819	0	444	487	0	552	819	0	0	1489	0	1391	2173	0	1112	3563	0	1527	2148	0	1573	2105	0	868	1574	0	558	1244	0	675	625	0	1118	1802	0
CA03186_01	CA03186_01	150	293	0	170	257	0	49	108	0	60	145	0	0	214	0	110	191	0	74	89	0	116	180	0	109	281	0	99	209	0	16	215	0	56	92	0	97	254	0
CA03475_01	CA03475_01	-13	9	-50	11	237	0	-9	34	-50	4	93	0	0	83	-50	122	130	0	-14	37	-50	-5	31	-50	-8	59	-50	-1	33	-50	6	124	0	-15	82	-50	-11	86	-50
CA03477_01	CA03477_01	-5	52	0	37	275	0	4	74	-50	-2	95	0	0	128	0	-3	46	-50	-15	36	-50	-10	22	-50	-4	49	-50	-12	50	-50	2	64	-50	-15	58	-50	-7	49	-50
CA03479_01	CA03479_01	-7	11	-50	26	210	0	-1	35	-50	4	48	-50	0	69	-50	0	35	-50	-20	14	-50	-16	0	-50	-9	30	-50	-13	11	-50	-3	43	-50	-18	37	-50	-12	18	-50
CA03481_01	CA03481_01	412	585	0	755	1038	0	136	117	0	229	289	0	0	545	0	371	523	0	306	632	0	360	436	0	429	711	0	192	567	0	81	372	0	149	269	0	266	514	0
CA00570_01	CA00570_01	237	147	0	1052	473	0	146	72	0	283	289	0	0	1246	0	1117	320	0	170	159	0	625	301	0	625	1124	0	95	1029	0	125	716	0	197	337	0	458	826	0
CA03484_01	CA03484_01	272	416	0	585	522	0	86	65	0	178	246	0	0	465	0	238	316	0	167	224	0	226	189	0	285	530	0	136	393	0	43	289	0	84	206	0	227	438	0
CA03496_01	CA03496_01	235	345	0	476	289	0	104	95	0	127	217	0	0	425	0	220	249	0	139	113	0	225	258	0	250	551	0	108	419	0	23	396	0	103	235	0	242	543	0
CA03497_01	CA03497_01	258	636	0	532	377	0	146	163	0	134	260	0	0	496	0	228	494	0	205	152	0	278	374	0	339	588	0	239	347	0	38	332	0	208	226	0	262	470	0
CA03499_01	CA03499_01	86	71	0	71	205	0	68	110	0	40	129	0	0	307	0	270	180	0	22	60	-50	56	103	-50	107	227	0	15	264	0	42	267	0	163	204	0	151	376	0
CA03501_01	CA03501_01	731	1047	0	1215	531	0	241	143	0	263	304	0	0	770	0	381	646	0	376	279	0	469	547	0	531	922	0	369	727	0	45	525	0	242	375	0	392	822	0
CA03503_01	CA03503_01	400	510	0	517	1027	0	150	133	0	134	285	0	0	434	0	208	297	0	177	168	0	280	223	0	240	390	0	192	312	0	43	272	0	94	216	0	245	518	0
CA03505_01	CA03505_01	121	514	0	150	532	0	50	71	0	51	105	0	0	221	0	104	650	0	118	703	0	78	153	0	145	350	0	129	113	0	147	117	0	95	102	0	91	210	0
CA03519_01	CA03519_01	196	381	0	346	247	0	82	98	0	59	166	0	0	292	0	313	384	0	129	121	0	185	200	0	193	297	0	130	264	0	25	202	0	71	144	0	166	343	0
CA03521_01	CA03521_01	0	20	-50	15	28	-50	3	45	-50	7	66	0	0	77	-50	29	44	-50	-16	20	-50	-18	11	-50	-11	13	-50	-21	29	-50	-6	48	-50	-25	21	-50	-2	50	-50
CA03523_01	CA03523_01	94	300	0	186	256	0	44	70	0	43	151	0	0	200	0	114	224	0	66	88	0	95	107	0	91	219	0	91	136	0	15	127	0	42	93	0	94	250	0
CA03525_01	CA03525_01	92	203	0	205	302	0	54	76	0	52	137	0	0	218	0	144	181	0	79	89	0	79	131	0	111	220	0	45	191	0	13	145	0	33	120	0	98	253	0
CA03527_01	CA03527_01	-8	10	-50	15	78	-50	4	38	-50	5	57	0	0	60	-50	602	210	0	-1	13	-50	4	33	-50	18	40	-50	-6	-9	-50	-3	37	-50	8	41	-50	6	47	-50
CA03529_01	CA03529_01	352	515	0	723	335	0	150	125	0	196	264	0	0	462	0	376	444	0	360	211	0	167	357	0	321	691	0	190	618	0	40	461	0	128	243	0	355	713	0
CA03543_01	CA03543_01	465	472	0	672	443	0	203	136	0	245	254	0	0	573	0	352	454	0	292	246	0	153	351	0	387	773	0	194	735	0	49	549	0	185	326	0	447	883	0
CA03545_01	CA03545_01	32	43	-50	73	371	0	1	42	-50	-3	85	0	0	151	0	121	66	0	18	131	0	37	42	-50	22	79	-50	-8	-20	-50	7	53	-50	-9	72	-50	9	84	-50
CA03547_01	CA03547_01	670	1221	0	922	616	0	76	87	0	113	257	0	0	557	0	1134	1097	0	354	433	0	489	746	0	484	925	0	437	543	0	55	488	0	140	173	0	338	604	0
CA03549_01	CA03549_01	354	548	0	420	832	0	97	239	0	117	389	0	0	577	0	209	419	0	255	372	0	242	364	0	255	503	0	203	372	0	55	364	0	91	185	0	182	400	0
CA03551_01	CA03551_01	458	650	0	587	336	0	115	84	0	108	240	0	0	402	0	388	372	0	216	195	0	333	212	0	325	583	0	205	350	0	43	346	0	67	196	0	272	459	0
CA03553_01	CA03553_01	-13	-1	-50	0	79	-50	-8	27	-50	-4	46	-50	0	71	-50	151	19	0	-24	8	-50	-5	28	-50	-7	20	-50	-22	-27	-50	-6	11	-50	-42	1	-50	-16	10	-50
CA03836_01	CA03836_01	-5	11	-50	25	218	0	7	38	0	1	64	-50	26	74	-50	10	39	-50	-13	17	-50	-6	1	-50	-6	33	-50	-4	14	-50	-2	37	-50	-18	29	-50	-13	22	-50
CA03838_01	CA03838_01	376	864	0	604	801	0	129	196	0	142	352	0	283	516	0	305	589	0	162	157	0	224	351	0	310	675	0	336	598	0	16	342	0	179	272	0	353	634	0
CA03840_01	CA03840_01	-9	32	0	31	187	-50	0	48	-50	-1	59	-50	18	74	-50	44	73	0	-25	10	-50	-11	12	-50	-9	37	-50	-8	29	-50	0	73	-50	-13	39	-50	-8	36	-50
CA03842_01	CA03842_01	219	357	0	478	503	0	67	81	0	131	197	0	274	375	0	223	321	0	159	262	0	230	275	0	306	482	0	126	343	0	47	273	0	104	176	0	203	417	0
CA03844_01	CA03844_01	314	1581	0	576	2192	0	99	108	0	222	285	0	398	541	0	407	2416	0	342	1899	0	437	586	0	576	727	0	1415	579	0	167	399	0	188	255	0	393	606	0
CA03846_01	CA03846_01	252	496	0	642	438	0	77	80	0	175	215	0	278	455	0	239	424	0	138	204	0	217	262	0	293	586	0	201	430	0	40	311	0	127	227	0	221	502	0
CA03859_01	CA03859_01	535	969	0	1150	1114	0	258	191	0	294	399	0	749	952	0	545	971	0	413	690	0	528	620	0	686	1328	0	508	812	0	229	605	0	354	454	0	544	853	0
CA03861_01	CA03861_01	100	201	0	231	240	0	67	77	0	64	152	0	117	221	-50	184	162	0	67	57	-50	471	191	0	144	247	0	80	215	0	14	175	0	40	120	0	97	261	0
CA03863_01	CA03863_01	33	35	0	74	545	0	18	50	0	5	73	0	45	110	-50	37	94	0	7	268	0	26	76	-50	31	81	-50	10	45	-50	42	63	-50	6	46	-50	21	88	-50
CA03865_01	CA03865_01	551	31	0	802	189	0	228	109	0	241	373	0	606	660	0	511	40	0	389	42	0	548	133	0	608	713	0	-13	922	0	2	680	0	91	486	0	641	1028	0
CA03867_01	CA03867_01	537	962	0	948	372	0	203	167	0	169	268	0	450	670	0	420	671	0	255	133	0	369	376	0	387	716	0	417	686	0	35	492	0	264	332	0	434	790	0
CA03869_01	CA03869_01	511	803	0	960	285	0	236	191	0	286	323	0	426	649	0	673	842	0	497	185	0	524	627	0	585	960	0	397	984	0	46	703	0	363	464	0	563	1060	0
CA03883_01	CA03883_01	136	383	0	296	246	0	216	186	0	95	229	0	248	358	0	113	231	0	113	96	0	148	149	0	166	276	0	142	232	0	8	247	0	64	157	0	135	269	0
CA03885_01	CA03885_01	-7	11	-50	4	78	-50	2	36	-50	-1	56	-50	25	66	-50	12	35	-50	-20	15	-50	2	8	-50	-12	17	-50	-17	11	-50	-4	37	-50	-23	23	-50	-13	20	-50
CA03887_01	CA03887_01	-17	4	-50	13	165	-50	-2	25	-50	-3	49	-50	31	67	-50	196	101	0	-8	31	-50	18	15	-50	0	42	-50	-14	-33	-50	7	57	-50	8	51	-50	-5	34	-50
CA03889_01	CA03889_01	615	595	0	1252	851	0	303	260	0	271	374	0	677	821	0	605	867	0	574	1014	0	564	892	0	714	1313	0	193	975	0	176	748	0	380	472	0	560	1081	0
CA03891_01	CA03891_01	440	562	0	786	1059	0	241	273	0	198	331	0	459	571	0	499	776	0	404	896	0	497	713	0	523	917	0	212	600	0	188	464	0	284	304	0	435	722	0
CA03893_01	CA03893_01	-8	11	-50	60	173	-50	-6	47	-50	-3	48	-50	20	57	-50	17	27	-50	-13	4	-50	-13	12	-50	-8	19	-50	-19	-19	-50	-7	11	-50	-20	15	-50	-16	20	-50
CA03907_01	CA03907_01	932	2253	0	1922	873	0	423	322	0	468	632	0	1015	1241	0	974	1957	0	947	1044	0	770	1002	0	1098	1740	0	928	1343	0	196	1084	0	584	649	0	883	1455	0
CA03909_01	CA03909_01	566	898	0	834	789	0	210	171	0	177	401	0	614	717	0	479	636	0	383	341	0	464	398	0	505	712	0	346	601	0	80	522	0	163	269	0	380	618	0
CA03911_01	CA03911_01	671	1345	0	793	872	0	250	255	0	270	393	0	566	706	0	437	846	0	527	323	0	492	553	0	602	758	0	573	589	0	54	440	0	246	303	0	322	539	0
CA03913_01	CA03913_01	310	448	0	386	369	0	104	91	0	101	230	0	269	370	0	221	269	0	206	128	0	231	139	0	235	425	0	174	318	0	21	279	0	66	170	0	177	354	0
CA03915_01	CA03915_01	3428	5273	0	4455	987	0	962	442	0	971	1067	0	1968	2741	0	2101	4982	0	2065	1344	0	2663	2838	0	2403	4747	0	2499	3413	0	265	2902	0	941	1392	0	2101	3886	0
CA03917_01	CA03917_01	1037	1449	0	2082	3544	0	304	365	0	234	653	0	1258	1311	0	1302	1180	0	1299	1152	0	1283	1238	0	1220	1515	0	754	1132	0	188	854	0	383	471	0	755	1171	0
CA04203_01	CA04203_01	341	515	0	558	892	0	132	158	0	123	246	0	191	411	0	207	387	0	151	397	0	276	380	0	321	610	0	217	388	0	57	269	0	208	282	0	237	505	0
CA04205_01	CA04205_01	3250	3237	0	6029	1012	0	1305	588	0	1628	1525	0	2650	3479	0	2869	2608	0	2952	475	0	3771	2792	0	4493	5849	0	1957	6064	0	64	3192	0	1205	2366	0	3118	6084	0
CA04207_01	CA04207_01	-14	39	-50	9	384	0	-9	61	-50	-9	121	0	-20	142	0	3	52	-50	-31	52	-50	-15	41	-50	-13	49	-50	-19	30	-50	2	74	-50	-28	59	-50	-18	42	-50
CA04209_01	CA04209_01	458	1207	0	1099	830	0	119	80	0	301	440	0	536	845	0	398	878	0	313	230	0	528	418	0	536	1010	0	535	708	0	42	483	0	218	332	0	464	743	0
CA04211_01	CA04211_01	-21	31	-50	10	173	-50	-11	15	-50	-3	59	-50	-17	82	-50	2	38	-50	-17	35	-50	-13	33	-50	-18	27	-50	-23	-9	-50	0	42	-50	-25	50	-50	-14	30	-50
CA04213_01	CA04213_01	987	2971	0	2071	1313	0	510	430	0	706	784	0	1221	1469	0	849	2016	0	963	592	0	968	1123	0	1379	1933	0	1507	1687	0	127	1219	0	742	792	0	1192	1973	0
CA04227_01	CA04227_01	157	269	0	442	315	0	80	96	0	91	158	0	206	356	0	174	296	0	113	123	0	202	316	0	238	399	0	182	367	0	29	285	0	140	184	0	213	390	0
CA04229_01	CA04229_01	109	156	0	294	341	0	57	78	0	83	146	0	109	262	0	124	182	0	71	161	0	139	160	0	166	272	0	74	254	0	33	207	0	55	120	0	145	334	0
CA04231_01	CA04231_01	62	12	0	95	216	0	6	38	-50	21	84	0	28	137	0	463	140	0	35	61	0	61	77	0	67	132	0	-4	70	-50	22	112	0	27	49	0	69	136	0
CA04233_01	CA04233_01	0	36	0	16	192	-50	1	43	-50	7	62	-50	-6	92	-50	66	63	0	-6	57	0	-2	9	-50	13	46	-50	-3	2	-50	5	62	-50	1	33	-50	8	54	-50
CA04235_01	CA04235_01	-19	2	-50	-19	19	-50	-11	32	-50	-5	59	-50	-19	55	-50	9	26	-50	-21	18	-50	-25	-6	-50	-8	17	-50	-20	-14	-50	-7	29	-50	-23	10	-50	-16	25	-50
CA04237_01	CA04237_01	88	163	0	204	449	0	40	104	0	54	177	0	80	246	0	153	189	0	68	251	0	80	153	0	113	225	0	64	203	0	40	197	0	46	211	0	93	288	0
CA04251_01	CA04251_01	1637	2737	0	3543	1259	0	442	339	0	436	713	0	1255	1742	0	1409	1923	0	1132	614	0	1499	1852	0	1648	2692	0	1046	2072	0	119	1300	0	747	801	0	1273	2299	0
CA04253_01	CA04253_01	-15	18	-50	-4	25	-50	-7	33	-50	-7	56	-50	-13	60	-50	353	173	0	-17	13	-50	-13	-2	-50	-3	31	-50	-8	-3	-50	0	33	-50	-12	27	-50	-6	30	-50
CA04255_01	CA04255_01	-14	25	-50	1	86	-50	-6	39	-50	-8	53	-50	-15	58	-50	2	32	-50	-14	16	-50	-23	8	-50	-15	23	-50	-19	-2	-50	-6	24	-50	-13	39	-50	-20	22	-50
CA04257_01	CA04257_01	145	424	0	263	355	0	94	96	0	96	191	0	170	284	0	173	339	0	157	97	0	182	134	0	196	299	0	199	276	0	12	235	0	78	152	0	192	321	0
CA04259_01	CA04259_01	632	1046	0	1215	1257	0	252	177	0	323	479	0	711	839	0	732	886	0	650	503	0	665	545	0	778	1015	0	419	778	0	93	604	0	210	401	0	484	752	0
CA04261_01	CA04261_01	580	690	0	1191	1036	0	330	386	0	347	580	0	603	900	0	538	611	0	457	561	0	583	942	0	537	1048	0	304	1050	0	106	857	0	380	567	0	590	1231	0
CA04275_01	CA04275_01	19	21	-50	28	351	0	3	38	-50	7	92	0	19	93	-50	670	183	0	11	161	0	48	61	-50	53	126	0	0	14	-50	82	189	0	7	49	-50	15	82	-50
CA04277_01	CA04277_01	58	288	0	104	194	0	29	93	0	19	134	0	62	178	0	64	198	0	49	52	0	74	79	0	66	122	0	106	122	0	4	112	0	22	84	-50	69	143	0
CA04279_01	CA04279_01	489	717	0	746	257	0	182	107	0	157	252	0	400	581	0	413	536	0	396	181	0	400	431	0	443	793	0	266	523	0	41	522	0	193	254	0	398	612	0
CA04281_01	CA04281_01	33	44	0	11	100	-50	-2	31	-50	-4	59	-50	-9	75	-50	4	15	-50	-15	25	-50	-12	16	-50	-8	20	-50	-18	-5	-50	-7	22	-50	-28	18	-50	-15	18	-50
CA04283_01	CA04283_01	5853	9311	0	5920	3225	0	1706	1136	0	1763	2056	0	4004	4303	0	3001	6195	0	4107	2187	0	4153	4174	0	4293	5853	0	3516	4027	0	451	3485	0	2071	1936	0	2769	3950	0
CA04285_01	CA04285_01	951	1465	0	1179	3274	0	364	320	0	328	493	0	804	892	0	756	1403	0	1217	2254	0	1099	1034	0	1043	1127	0	655	841	0	338	723	0	323	400	0	557	869	0
CA04572_01	CA04572_01	417	627	0	941	1387	0	113	99	0	182	243	0	348	527	0	396	536	0	291	755	0	396	396	0	422	714	0	285	500	0	93	276	0	149	250	0	316	547	0
CA04574_01	CA04574_01	-12	28	-50	12	237	-50	-5	85	0	-3	112	0	-19	126	-50	-3	77	-50	-30	63	-50	-22	79	-50	-13	104	-50	-13	78	-50	-3	201	0	-15	195	0	-8	157	-50
CA00608_01	CA00608_01	0	5	-50	28	245	0	3	27	-50	5	63	-50	-2	63	-50	221	106	0	-17	17	-50	4	22	-50	18	62	-50	-2	22	-50	11	53	-50	10	39	-50	12	61	-50
CA04577_01	CA04577_01	4339	9837	0	8486	7320	0	190	282	0	2589	2907	0	5122	5757	0	3688	8770	0	3241	4225	0	3814	4210	0	4967	8588	0	5225	6403	0	864	3619	0	2702	2966	0	3673	6249	0
CA04579_01	CA04579_01	-13	21	-50	104	179	-50	171	90	0	132	121	0	168	551	0	162	236	0	255	131	0	505	731	0	583	898	0	31	135	0	53	1065	0	457	752	0	227	1811	0
CA04581_01	CA04581_01	4725	12911	0	10022	12070	0	2802	1655	0	3323	4155	0	6608	8020	0	3797	7375	0	3520	2988	0	4741	3894	0	5798	8955	0	5987	6923	0	852	4587	0	2532	3189	0	5266	8034	0
CA04595_01	CA04595_01	310	391	0	865	519	0	169	147	0	194	262	0	391	651	0	320	348	0	232	282	0	377	511	0	494	849	0	210	784	0	65	495	0	263	347	0	427	831	0
CA04597_01	CA04597_01	259	418	0	517	1035	0	134	134	0	185	281	0	324	491	0	218	251	0	226	263	0	298	266	0	362	447	0	183	423	0	58	343	0	143	230	0	280	476	0
CA04599_01	CA04599_01	51	110	0	83	105	0	29	47	0	16	64	0	32	146	0	55	86	0	18	34	-50	25	55	-50	32	88	0	39	40	-50	-1	80	-50	10	59	-50	46	111	0
CA04601_01	CA04601_01	217	302	0	306	251	0	63	62	0	81	167	0	151	312	0	361	283	0	95	118	0	126	146	0	148	277	0	147	258	0	13	174	0	76	149	0	152	303	0
CA04603_01	CA04603_01	1105	896	0	1701	788	0	475	303	0	395	569	0	698	1154	0	972	898	0	739	591	0	981	741	0	880	1484	0	423	1517	0	127	1053	0	387	741	0	781	1488	0
CA04605_01	CA04605_01	675	987	0	1356	1081	0	350	203	0	389	455	0	716	871	0	667	1029	0	659	883	0	617	695	0	696	1184	0	529	1123	0	180	796	0	365	564	0	588	1078	0
CA04618_01	CA04618_01	390	358	0	805	612	0	288	158	0	218	319	0	419	625	0	469	417	0	326	476	0	461	306	0	522	754	0	203	693	0	160	645	0	314	453	0	499	924	0
CA04620_01	CA04620_01	413	786	0	839	901	0	201	179	0	183	295	0	474	628	0	427	715	0	418	458	0	484	462	0	501	763	0	410	743	0	81	488	0	201	335	0	425	720	0
CA04622_01	CA04622_01	431	1479	0	888	462	0	240	239	0	255	370	0	560	660	0	564	1332	0	426	176	0	528	701	0	562	1021	0	741	693	0	32	556	0	345	366	0	628	848	0
CA04624_01	CA04624_01	218	99	0	403	404	0	114	87	0	131	191	0	188	327	0	281	151	0	238	326	0	258	243	0	253	425	0	25	426	0	48	341	0	78	265	0	237	516	0
CA04626_01	CA04626_01	-14	1	-50	9	94	-50	-3	30	-50	-4	50	-50	-8	56	-50	59	30	-50	-17	16	-50	-15	8	-50	-10	28	-50	-20	-11	-50	-4	38	-50	-19	27	-50	-13	27	-50
CA04628_01	CA04628_01	43	131	0	125	115	-50	28	53	0	32	92	0	57	150	0	293	142	0	59	52	0	73	106	0	76	168	0	41	66	-50	11	109	0	23	60	-50	67	132	0
CA04642_01	CA04642_01	210	329	0	534	274	0	83	78	0	103	174	0	275	405	0	600	363	0	235	165	0	266	278	0	267	540	0	140	381	0	26	332	0	88	199	0	245	546	0
CA04644_01	CA04644_01	392	1000	0	649	625	0	222	181	0	131	305	0	410	537	0	320	635	0	368	263	0	408	361	0	377	625	0	502	557	0	72	465	0	202	295	0	405	662	0
CA04646_01	CA04646_01	208	340	0	304	251	0	82	107	0	80	161	0	215	322	0	207	289	0	163	92	0	200	244	0	191	352	0	199	291	0	11	252	0	126	179	0	192	338	0
CA04648_01	CA04648_01	922	156	0	1097	223	0	341	163	0	172	337	0	723	1165	0	802	135	0	900	90	0	1003	428	0	898	1103	0	46	977	0	15	1003	0	253	671	0	874	1561	0
CA04650_01	CA04650_01	11068	10733	0	13541	4422	0	3608	1560	0	3064	3190	0	8157	9142	0	6669	7702	0	5988	3033	0	8029	6364	0	8031	13258	0	4561	10527	0	790	8427	0	2880	4376	0	5891	9135	0
CA04652_01	CA04652_01	289	395	0	447	287	0	106	93	0	70	193	0	229	381	0	326	329	0	203	198	0	274	285	0	271	459	0	149	289	0	32	288	0	48	122	-50	161	295	0
CA04940_01	CA04940_01	-16	3	-50	18	118	-50	-8	27	-50	-4	38	-50	-23	42	-50	-9	29	-50	-28	19	-50	-20	7	-50	-9	18	-50	-11	1	-50	-7	20	-50	-18	26	-50	-18	14	-50
CA04942_01	CA04942_01	538	1012	0	1167	1870	0	294	330	0	313	516	0	569	938	0	589	912	0	436	675	0	658	935	0	728	1289	0	451	1102	0	123	832	0	479	629	0	676	1405	0
CA04944_01	CA04944_01	-16	-5	-50	14	101	-50	-9	21	-50	1	44	-50	-24	40	-50	-7	14	-50	-28	-8	-50	-20	-1	-50	-18	8	-50	-13	-4	-50	-4	15	-50	-31	4	-50	-12	16	-50
CA04946_01	CA04946_01	571	865	0	1464	797	0	308	140	0	387	482	0	768	1081	0	607	754	0	564	577	0	726	549	0	851	1509	0	486	1285	0	114	767	0	317	618	0	689	1323	0
CA04948_01	CA04948_01	234	368	0	658	618	0	121	96	0	167	244	0	290	452	0	248	391	0	169	272	0	271	387	0	360	589	0	173	428	0	63	299	0	192	212	0	219	588	0
CA04950_01	CA04950_01	9	22	-50	62	99	-50	7	23	-50	19	61	0	18	84	-50	44	52	0	2	22	-50	12	16	-50	38	88	0	-2	21	-50	9	84	0	-5	46	-50	33	78	-50
CA04964_01	CA04964_01	136	201	0	319	209	0	80	56	0	99	115	0	155	267	0	149	293	0	117	153	0	128	221	0	169	368	0	101	350	0	28	209	0	104	158	0	161	367	0
CA04966_01	CA04966_01	-21	4	-50	-3	18	-50	-5	19	-50	-3	36	-50	-13	32	-50	74	40	0	-26	-1	-50	-15	-9	-50	-8	14	-50	-27	-37	-50	-3	23	-50	-16	-2	-50	-4	23	-50
CA04968_01	CA04968_01	-5	9	-50	-9	34	-50	-1	6	-50	-1	34	-50	-21	38	-50	257	134	0	-17	11	-50	-14	2	-50	1	15	-50	-8	-25	-50	-2	17	-50	-3	21	-50	2	50	-50
CA04970_01	CA04970_01	-6	8	-50	-18	-27	-50	-11	15	-50	-2	33	-50	-29	35	-50	-3	14	-50	-27	-4	-50	-32	-23	-50	-13	3	-50	-31	-52	-50	-12	-13	-50	-29	-6	-50	-18	-3	-50
CA04972_01	CA04972_01	256	605	0	397	291	0	85	95	0	90	149	0	210	304	0	281	779	0	174	205	0	250	279	0	254	373	0	404	306	0	48	253	0	180	170	0	179	381	0
CA04974_01	CA04974_01	527	855	0	782	455	0	216	130	0	237	366	0	355	586	0	462	792	0	270	248	0	388	269	0	419	709	0	488	582	0	69	495	0	192	320	0	367	638	0
CA04988_01	CA04988_01	1591	1785	0	2691	1294	0	545	421	0	652	926	0	1414	1655	0	1311	1356	0	1252	705	0	1411	1315	0	1471	2208	0	919	1978	0	186	1484	0	697	934	0	1187	1955	0
CA04990_01	CA04990_01	-9	10	-50	-2	65	-50	-7	18	-50	-1	47	-50	-12	44	-50	50	35	-50	-16	23	-50	-8	0	-50	1	24	-50	-15	-11	-50	1	14	-50	-10	5	-50	-7	11	-50
CA04992_01	CA04992_01	768	1148	0	1426	3146	0	344	268	0	351	520	0	647	867	0	653	1174	0	714	1839	0	796	741	0	835	1223	0	437	920	0	313	752	0	291	439	0	635	1125	0
CA04994_01	CA04994_01	186	339	0	510	745	0	98	87	0	134	203	0	236	291	0	326	388	0	246	410	0	276	312	0	298	407	0	157	302	0	63	269	0	101	144	0	221	380	0
CA04996_01	CA04996_01	185	326	0	438	879	0	113	101	0	123	216	0	201	283	0	234	366	0	213	553	0	227	195	0	246	402	0	178	242	0	113	232	0	67	158	0	196	343	0
CA04998_01	CA04998_01	-20	7	-50	52	141	0	-8	16	-50	-5	29	-50	-17	32	-50	20	16	-50	-18	-3	-50	-22	-13	-50	-13	6	-50	-25	-19	-50	-6	1	-50	-22	2	-50	-15	5	-50
CA05011_01	CA05011_01	1988	2744	0	3159	1254	0	1293	771	0	1077	1469	0	2633	3101	0	1947	1967	0	2012	1013	0	2143	2074	0	2358	4368	0	1292	3325	0	271	2875	0	1129	1600	0	2171	3970	0
CA05013_01	CA05013_01	459	493	0	648	1473	0	175	121	0	123	295	0	492	594	0	443	300	0	410	436	0	448	237	0	452	588	0	203	581	0	87	421	0	97	238	0	331	561	0
CA05015_01	CA05015_01	-7	2	-50	12	63	-50	6	22	-50	-3	40	0	-4	68	-50	11	31	-50	-11	30	-50	-3	15	-50	4	41	-50	-14	-11	-50	1	28	-50	-11	12	-50	-2	47	-50
CA05017_01	CA05017_01	26	42	0	28	61	-50	19	31	-50	11	44	-50	10	75	-50	25	37	-50	-6	22	-50	6	24	-50	-1	26	-50	0	-6	-50	-1	16	-50	-16	1	-50	-4	13	-50
CA05019_01	CA05019_01	526	356	0	640	686	0	194	97	0	160	232	0	414	561	0	358	329	0	347	420	0	417	347	0	429	664	0	135	464	0	71	451	0	120	237	0	256	438	0
CA05021_01	CA05021_01	929	1884	0	1336	709	0	457	322	0	350	485	0	825	1100	0	668	1653	0	664	483	0	922	1113	0	876	1744	0	924	1240	0	110	1074	0	531	569	0	760	1206	0
CA05314_01	CA05314_01	22693	31733	0	45036	22475	0	18478	11795	0	18143	20090	0	30334	31638	0	23157	42489	0	25576	15048	0	23730	26002	0	31024	39397	0	28014	36191	0	2440	28641	0	22492	26960	0	31461	47008	0
CA05316_01	CA05316_01	547	624	0	850	869	0	249	170	0	281	443	0	443	656	0	432	526	0	424	528	0	436	341	0	555	865	0	248	748	0	68	547	0	232	450	0	698	1137	0
CA05318_01	CA05318_01	1297	2012	0	1746	902	0	545	328	0	660	718	0	1029	1501	0	700	1755	0	720	715	0	789	977	0	978	2005	0	887	1355	0	145	963	0	682	755	0	870	1617	0
CA05320_01	CA05320_01	791	524	0	1472	846	0	320	298	0	479	776	0	1066	1162	0	777	451	0	661	284	0	846	788	0	1143	1156	0	367	1132	0	61	733	0	391	552	0	707	1275	0
CA05322_01	CA05322_01	376	538	0	852	404	0	176	92	0	242	333	0	401	657	0	362	502	0	291	235	0	360	407	0	471	870	0	239	817	0	49	500	0	206	387	0	413	932	0
CA05323_01	CA05323_01	-19	-18	-50	21	93	-50	-11	7	-50	-6	36	-50	-24	45	-50	52	48	0	-19	13	-50	-9	19	-50	-3	22	-50	-14	-49	-50	4	27	-50	-12	13	-50	-9	23	-50
CA05337_01	CA05337_01	-13	-7	-50	0	65	-50	-9	15	-50	-9	36	-50	-28	41	-50	-8	19	-50	-23	1	-50	-21	-21	-50	-11	12	-50	-18	15	-50	-6	4	-50	-26	0	-50	-15	4	-50
CA05339_01	CA05339_01	178	265	0	987	601	0	104	81	0	85	147	0	141	327	0	152	193	0	88	82	0	181	130	0	144	391	0	138	402	0	35	312	0	102	132	0	147	324	0
CA00624_01	CA00624_01	56	152	0	64	46	-50	7	26	-50	7	56	-50	44	74	0	569	403	0	33	57	-50	79	136	0	89	168	0	109	48	-50	11	92	-50	47	72	-50	56	132	0
CA05342_01	CA05342_01	2986	5129	0	3212	1474	0	1108	585	0	1192	1366	0	1817	2236	0	1899	4310	0	1679	1220	0	1818	1502	0	1895	3893	0	3507	4512	0	347	3461	0	1441	2317	0	2200	4317	0
CA05344_01	CA05344_01	299	361	0	297	559	0	89	83	0	87	182	0	158	256	0	215	321	0	184	181	0	208	182	0	212	317	0	152	256	0	45	236	0	94	169	0	180	319	0
CA05346_01	CA05346_01	53	107	0	63	150	-50	43	39	-50	29	49	0	37	106	0	48	99	0	38	54	-50	25	15	-50	53	83	-50	52	68	-50	24	105	0	17	76	-50	47	126	-50
CA05360_01	CA05360_01	267	238	0	445	328	0	82	72	0	73	156	0	290	417	0	422	284	0	233	227	0	274	319	0	305	481	0	118	454	0	44	320	0	158	215	0	232	483	0
CA05362_01	CA05362_01	159	301	0	219	207	0	68	60	0	50	128	0	97	218	0	120	250	0	121	99	0	110	128	0	130	284	0	99	248	0	22	197	0	70	120	0	116	294	0
CA05364_01	CA05364_01	877	2036	0	1429	558	0	516	421	0	465	655	0	1041	1132	0	682	1503	0	807	229	0	879	1090	0	888	1461	0	922	1311	0	68	1091	0	633	696	0	845	1430	0
CA00461_01	CA00461_01	1060	2157	0	2236	1682	0	467	342	0	422	505	0	1075	1333	0	1005	1550	0	945	1493	0	964	1438	0	1012	2131	0	794	1807	0	294	1498	0	660	794	0	822	1816	0
CA05366_01	CA05366_01	-16	-11	-50	76	172	0	-5	10	-50	-6	29	-50	-14	35	-50	-1	4	-50	-26	-13	-50	-23	-11	-50	-12	-2	-50	-19	-39	-50	-4	5	-50	-24	16	-50	-4	21	-50
CA05368_01	CA05368_01	26	40	0	90	135	-50	44	45	0	35	94	0	76	147	0	63	54	0	66	82	0	58	57	0	71	106	0	20	63	-50	16	103	0	9	43	-50	79	150	0
CA05381_01	CA05381_01	122	266	0	208	183	0	83	67	0	91	135	0	135	240	0	192	228	0	165	186	0	144	193	0	157	302	0	103	239	0	33	277	0	93	156	0	174	377	0
CA05383_01	CA05383_01	-10	10	-50	4	46	-50	-7	23	-50	-3	47	-50	-13	42	-50	4	16	-50	-20	10	-50	-7	7	-50	-11	11	-50	-24	-29	-50	-6	5	-50	-20	1	-50	-5	14	-50
CA05385_01	CA05385_01	268	428	0	439	386	0	152	111	0	96	189	0	285	382	0	590	461	0	230	313	0	328	314	0	267	506	0	243	455	0	84	426	0	189	263	0	303	576	0
CA05387_01	CA05387_01	-7	5	-50	1	42	-50	-7	3	-50	-3	38	-50	-17	58	-50	55	19	-50	-24	0	-50	-15	-9	-50	-11	4	-50	-21	-38	-50	-9	-14	-50	-14	5	-50	-19	-14	-50
CA05389_01	CA05389_01	353	212	0	466	1201	0	134	171	0	114	188	0	340	436	0	289	208	0	233	734	0	329	451	0	351	508	0	38	335	0	160	309	0	211	195	0	195	339	0
CA05391_01	CA05391_01	-6	15	-50	7	50	-50	1	22	-50	4	46	-50	-1	45	-50	23	33	-50	-12	13	-50	3	33	-50	4	38	-50	1	32	-50	0	36	-50	-12	12	-50	-5	22	-50
CA00636_01	CA00636_01	1810	5855	0	3918	8176	0	1147	1235	0	1355	2194	0	1865	2623	0	1812	4843	0	1340	2300	0	1686	2458	0	2232	3526	0	2427	2494	0	473	1879	0	1624	1669	0	1734	3267	0
CA05680_01	CA05680_01	926	2034	0	1912	1566	0	532	358	0	706	915	0	1008	1330	0	915	1369	0	846	435	0	979	765	0	1317	1589	0	1134	1538	0	104	1105	0	648	882	0	1176	1880	0
CA05682_01	CA05682_01	1929	2610	0	3256	3810	0	1001	608	0	1288	1849	0	2234	2686	0	1710	1738	0	1445	1030	0	1888	1337	0	2392	2808	0	1233	2566	0	277	1740	0	1014	1569	0	1968	2932	0
CA05684_01	CA05684_01	665	1228	0	1107	810	0	630	431	0	568	630	0	642	894	0	575	978	0	516	655	0	616	789	0	759	1361	0	604	1104	0	244	987	0	611	727	0	794	1509	0
CA05686_01	CA05686_01	893	1079	0	2211	2051	0	368	220	0	587	1007	0	1281	1372	0	1115	794	0	708	428	0	1073	693	0	1315	1894	0	650	1741	0	138	1103	0	408	829	0	1197	1969	0
CA05688_01	CA05688_01	-10	17	-50	20	88	-50	-6	23	-50	1	48	-50	-7	54	-50	4	39	-50	-15	25	-50	-15	5	-50	-8	16	-50	-9	-35	-50	1	26	-50	-13	19	-50	-4	26	-50
CA05702_01	CA05702_01	1909	2561	0	1904	2075	0	991	727	0	839	1036	0	1349	1844	0	1288	2131	0	895	1209	0	1297	1630	0	1721	2628	0	1394	2448	0	412	2006	0	1278	1575	0	1720	2824	0
CA00637_01	CA00637_01	662	1100	0	794	704	0	325	208	0	298	382	0	447	704	0	382	852	0	296	316	0	437	509	0	501	912	0	667	926	0	109	740	0	334	532	0	599	1095	0
CA05705_01	CA05705_01	562	366	0	683	602	0	168	111	0	213	293	0	349	546	0	386	357	0	265	319	0	348	308	0	336	534	0	187	554	0	74	431	0	167	302	0	319	606	0
CA05707_01	CA05707_01	95	108	0	94	143	0	34	32	-50	26	65	-50	70	111	0	116	114	0	25	73	-50	50	51	-50	53	113	0	28	42	-50	16	90	-50	30	59	-50	56	150	0
CA05709_01	CA05709_01	482	704	0	586	711	0	165	126	0	119	203	0	306	478	0	549	679	0	258	252	0	337	335	0	277	503	0	330	473	0	54	318	0	185	234	0	239	460	0
CA05711_01	CA05711_01	2132	949	0	2485	1986	0	970	427	0	937	1230	0	1830	2065	0	1656	866	0	1515	943	0	1507	855	0	1790	2235	0	515	2866	0	216	1969	0	584	1317	0	1530	2604	0
CA05724_01	CA05724_01	866	697	0	1332	624	0	1059	631	0	516	694	0	1491	2513	0	1405	1547	0	1122	1267	0	1588	1509	0	1185	2777	0	1010	4126	0	466	3329	0	1469	1675	0	1619	3287	0
CA05726_01	CA05726_01	313	307	0	444	235	0	154	127	0	98	149	0	300	528	0	205	320	0	184	262	0	222	320	0	218	571	0	131	517	0	67	446	0	146	239	0	209	603	0
CA05728_01	CA05728_01	81	136	0	97	154	0	103	102	0	57	118	0	109	237	0	74	117	0	55	53	-50	89	115	0	93	186	0	66	150	-50	21	157	0	93	110	0	97	244	0
CA00639_01	CA00639_01	241	496	0	458	440	0	177	146	0	145	230	0	368	536	0	224	342	0	251	508	0	238	285	0	284	572	0	198	439	0	84	400	0	150	243	0	219	572	0
CA05731_01	CA05731_01	15	69	0	127	234	0	44	58	0	27	83	0	40	119	0	40	58	0	13	56	-50	49	59	-50	46	103	0	23	70	-50	28	135	0	20	58	-50	49	141	0
CA05733_01	CA05733_01	-11	5	-50	4	46	-50	-3	29	-50	-5	31	-50	-14	44	-50	-3	16	-50	-21	7	-50	-11	-11	-50	-5	18	-50	-18	-32	-50	8	38	-50	-33	7	-50	-4	36	-50
CA05746_01	CA05746_01	316	473	0	583	1871	0	179	133	0	141	289	0	445	506	0	441	441	0	322	1178	0	342	368	0	370	547	0	183	360	0	259	421	0	129	225	0	300	493	0
CA05748_01	CA05748_01	73	432	0	277	498	0	42	91	0	29	103	0	156	228	0	938	813	0	172	257	0	315	468	0	209	281	0	406	270	0	66	317	0	229	237	0	244	417	0
CA05749_01	CA05749_01	378	453	0	520	860	0	182	152	0	149	238	0	288	404	0	322	487	0	294	691	0	371	430	0	329	601	0	175	550	0	146	429	0	188	244	0	323	577	0
CA05751_01	CA05751_01	249	299	0	363	364	0	95	82	0	61	136	0	237	335	0	201	284	0	172	292	0	247	254	0	183	348	0	101	248	0	56	270	0	81	147	0	146	302	0
CA05753_01	CA05753_01	-30	4	-50	-9	44	-50	-15	19	-50	-4	47	-50	-21	46	-50	-6	21	-50	-25	-3	-50	-17	-6	-50	-11	7	-50	-16	-23	-50	-8	13	-50	-30	5	-50	-19	4	-50
CA05755_01	CA05755_01	2305	3656	0	2764	2431	0	1259	731	0	798	1256	0	2065	2493	0	2105	2527	0	1792	1861	0	2670	1886	0	2441	3205	0	1559	2322	0	449	2186	0	984	1261	0	1528	2513	0
CA06042_01	CA06042_01	529	1268	0	1062	1110	0	448	448	0	424	738	0	528	887	0	524	922	0	475	432	0	565	632	0	650	1000	0	667	908	0	89	591	0	507	573	0	640	1121	0
CA06044_01	CA06044_01	191	303	0	369	385	0	144	128	0	163	225	0	160	315	0	203	274	0	176	243	0	182	251	0	229	396	0	123	374	0	51	274	0	198	284	0	269	574	0
CA06046_01	CA06046_01	18	58	0	112	377	0	15	41	-50	27	102	0	32	101	-50	49	63	-50	23	274	0	32	69	-50	48	98	0	22	60	-50	53	80	0	33	75	-50	44	97	-50
CA06048_01	CA06048_01	718	2842	0	1634	709	0	208	217	0	377	651	0	848	1074	0	1122	1695	0	620	189	0	889	1099	0	930	1458	0	1271	1132	0	97	773	0	627	523	0	1019	1434	0
CA06050_01	CA06050_01	-11	9	-50	17	96	-50	-12	11	-50	-3	41	-50	-19	26	-50	-3	27	-50	-13	10	-50	-7	12	-50	-10	6	-50	-12	-28	-50	0	15	-50	-12	23	-50	-8	31	-50
CA06052_01	CA06052_01	-10	-4	-50	11	114	-50	-14	10	-50	-3	42	-50	-25	36	-50	82	52	0	-16	26	-50	-4	46	-50	-2	26	-50	-8	-9	-50	-2	11	-50	-11	7	-50	-9	14	-50
CA06066_01	CA06066_01	444	778	0	551	784	0	184	142	0	188	260	0	293	451	0	372	947	0	311	695	0	344	559	0	348	696	0	379	632	0	146	460	0	262	313	0	367	666	0
CA06068_01	CA06068_01	587	586	0	943	555	0	194	103	0	248	333	0	558	804	0	762	525	0	354	167	0	566	412	0	522	913	0	348	1008	0	44	581	0	245	518	0	570	919	0
CA06070_01	CA06070_01	855	832	0	988	510	0	324	221	0	322	432	0	565	955	0	615	743	0	468	321	0	729	739	0	657	1135	0	467	1064	0	108	913	0	451	642	0	762	1227	0
CA06072_01	CA06072_01	1697	1728	0	1957	669	0	434	451	0	520	737	0	869	1425	0	1537	1577	0	1230	487	0	1575	1859	0	1406	2137	0	690	1849	0	121	1385	0	1103	939	0	1229	1986	0
CA06074_01	CA06074_01	814	848	0	813	1331	0	362	265	0	331	534	0	567	805	0	505	717	0	498	623	0	550	443	0	505	839	0	399	964	0	123	693	0	294	495	0	455	894	0
CA06076_01	CA06076_01	2831	4943	0	4850	6744	0	1221	962	0	962	1302	0	3659	4557	0	3663	8409	0	2811	3873	0	3665	4359	0	2970	5670	0	4085	5710	0	882	3697	0	2412	2443	0	3205	5080	0
CA06089_01	CA06089_01	851	1073	0	1356	961	0	417	227	0	196	410	0	900	1137	0	692	843	0	509	508	0	730	597	0	715	1078	0	720	1266	0	139	936	0	346	663	0	794	1397	0
CA06091_01	CA06091_01	-20	-11	-50	-14	8	-50	-8	9	-50	-9	29	-50	-26	47	-50	66	23	0	-21	2	-50	-17	-1	-50	-9	14	-50	-25	-11	-50	1	17	-50	-16	10	-50	-6	31	-50
CA06093_01	CA06093_01	-9	1	-50	-1	38	-50	-6	21	-50	-2	50	-50	-16	51	-50	61	26	0	-18	-9	-50	-13	-11	-50	-4	24	-50	-17	140	-50	0	22	-50	-12	8	-50	7	51	-50
CA06095_01	CA06095_01	1062	1572	0	1661	1207	0	640	431	0	584	957	0	815	864	0	791	1060	0	942	453	0	1019	783	0	1018	1680	0	626	1491	0	121	1280	0	468	801	0	924	1613	0
CA06097_01	CA06097_01	219	579	0	495	419	0	142	87	0	129	185	0	268	371	0	297	409	0	348	522	0	276	316	0	322	592	0	163	446	0	108	449	0	202	300	0	251	639	0
CA06099_01	CA06099_01	-25	-10	-50	3	20	-50	-11	15	-50	-5	44	-50	-19	24	-50	-5	15	-50	-26	5	-50	-15	-3	-50	-9	16	-50	-16	-11	-50	6	33	-50	-22	4	-50	-19	2	-50
CA06113_01	CA06113_01	510	1590	0	941	728	0	385	277	0	325	491	0	672	925	0	643	1224	0	619	497	0	687	597	0	665	1080	0	638	678	0	123	771	0	407	491	0	624	1059	0
CA06114_01	CA06114_01	534	1473	0	962	506	0	181	144	0	118	288	0	559	749	0	729	1485	0	456	727	0	569	763	0	474	998	0	619	725	0	114	583	0	327	387	0	432	818	0
CA06116_01	CA06116_01	8316	13609	0	11430	8153	0	4041	2581	0	3613	5284	0	7309	7175	0	5923	9613	0	7416	3054	0	8278	6623	0	7129	9921	0	6759	9145	0	839	7811	0	3062	4105	0	6889	9082	0
CA06118_01	CA06118_01	217	281	0	345	225	0	56	52	-50	68	140	0	211	276	0	221	304	0	172	198	0	249	273	0	200	372	0	152	292	0	38	268	0	79	148	-50	159	325	0
CA10298_01	CA10298_01	4192	5278	0	5512	2922	0	1933	1035	0	1516	1920	0	3686	4119	0	3629	5079	0	3048	3520	0	4632	4968	0	4534	5697	0	3132	5302	0	814	4889	0	2317	2745	0	3790	5808	0
CA06121_01	CA06121_01	304	470	0	436	306	0	182	102	0	125	200	0	729	402	0	246	330	0	148	198	0	308	362	0	266	537	0	177	404	0	44	383	0	158	211	0	224	411	0
CA10007_01	cytosine deaminase	925	3578	0	1632	1074	0	427	413	0	520	716	0	645	1087	0	613	2636	0	521	430	0	754	961	0	825	1430	0	1619	1078	0	71	709	0	818	724	0	782	1136	0
CA10001_01	alpha-aminoadipate reductase large subunit	236	297	0	367	549	0	176	155	0	136	177	0	68	165	0	177	357	0	125	498	0	171	262	0	208	416	0	169	334	0	130	247	0	220	272	0	220	450	0
CA10150_01	cytochrome C heme lyase	699	1350	0	1036	861	0	318	266	0	305	381	0	511	743	0	398	1099	0	351	498	0	420	751	0	506	1042	0	557	768	0	105	550	0	587	477	0	447	839	0
CA10052_01	Mnn9p	2689	2960	0	3640	4045	0	1179	756	0	1408	1568	0	2182	2668	0	1544	2217	0	1545	909	0	1983	1590	0	2236	2691	0	1437	2459	0	285	2051	0	1131	1588	0	2032	3071	0
CA10085_01	hyphal wall protein 1	-14	-6	-50	15	96	-50	-4	44	-50	1	36	-50	-19	49	-50	4	35	-50	-14	23	-50	-3	143	-50	-6	27	-50	0	32	-50	5	54	-50	1093	49	0	2	62	-50
CA10287_01	lanosterol 14 alpha demethylase	2499	4804	0	2753	3378	0	1363	992	0	1397	1587	0	2206	2532	0	1383	4077	0	1638	1512	0	1937	2022	0	1982	3123	0	3030	2863	0	582	2395	0	1270	1651	0	2269	3699	0
CA10219_01	pre-aspartyl proteinase	2256	2675	0	2381	3665	0	1412	1153	0	1199	1684	0	2245	2931	0	1373	2478	0	1303	1777	0	2042	2237	0	1946	2897	0	2157	2701	0	573	2145	0	1450	1772	0	2263	3542	0
CA10172_01	actin	20153	16795	0	27575	6707	0	9131	2941	0	9152	9983	0	16079	21269	0	12605	16287	0	10952	8793	0	11784	13428	0	15156	25477	0	12432	26404	0	2826	22435	0	9633	16803	0	17472	30150	0
CA10158_01	microbial aspartic proteinases	-1	8	-50	14	71	-50	-4	26	-50	0	37	-50	-20	52	-50	71	64	0	-1	97	-50	-6	25	-50	13	53	-50	-7	-6	-50	8	40	-50	-8	37	-50	7	63	-50
CA10165_01	Fatty acid synthase subunit beta	3796	4365	0	3382	773	0	1786	1257	0	1489	1587	0	2541	3394	0	1960	3961	0	2099	1439	0	2236	4161	0	1931	4026	0	2156	4302	0	415	3358	0	2794	2633	0	2707	5928	0
CA10161_01	MAP kinase Mkc1	1307	1146	0	1205	2080	0	491	348	0	357	531	0	936	1266	0	1302	1302	0	758	1303	0	1004	1020	0	1064	1342	0	643	1420	0	347	1061	0	663	874	0	862	1591	0
CA10154_01	dUTPase	903	1558	0	965	1796	0	464	369	0	409	653	0	976	1136	0	582	1057	0	562	527	0	610	653	0	631	1085	0	1092	1128	0	177	866	0	518	552	0	817	1207	0
CA10087_01	heat shock protein 70	29327	33515	0	38042	12413	0	16313	7557	0	9008	11239	0	27307	31852	0	21529	46911	0	18340	21786	0	12352	26116	0	21218	41931	0	24938	36808	0	6143	34871	0	20517	23048	0	25443	41814	0
CA10059_01	multicopper oxidase	67	139	0	106	107	-50	40	79	0	28	75	-50	82	177	0	65	180	0	47	130	0	25	129	-50	65	179	0	89	153	-50	18	250	-50	67	63	-50	74	174	0
CA10141_01	topoisomerase II	656	755	0	817	537	0	316	262	0	247	435	0	863	998	0	475	685	0	424	310	0	529	759	0	522	1101	0	444	1047	0	69	769	0	397	529	0	636	1148	0
CA10048_01	hexose transporter	192	222	0	329	203	0	103	75	0	95	149	0	271	286	0	200	264	0	202	105	0	235	186	0	233	427	0	191	425	0	12	366	0	153	234	0	268	477	0
CA10111_01	origin recognition complex 1 protein	317	424	0	495	741	0	175	137	0	152	221	0	313	409	0	275	353	0	293	359	0	293	276	0	346	488	0	183	426	0	70	376	0	170	232	0	279	431	0
CA00374_01	Candida albicans adenosine triphosphatase (PMA1) gene, complete	9068	25229	0	20701	5301	0	5837	3144	0	4174	4760	0	12885	14473	0	9236	31563	0	10481	8875	0	12135	14762	0	11008	20817	0	13977	13208	0	1710	16209	0	8994	9545	0	12001	21309	0
CA10168_01	deduced CDC3 protein from Candida albicans	2286	3234	0	5036	2071	0	1142	453	0	916	1187	0	2958	3377	0	2557	2835	0	2075	2538	0	2464	2189	0	2571	4494	0	1267	2898	0	487	2891	0	1180	1829	0	2111	3648	0
CA10155_01	aspartyl protease	44	27	-50	137	306	0	56	81	0	17	62	-50	86	180	0	192	80	0	78	330	0	132	236	0	90	214	0	15	135	-50	66	163	0	94	71	-50	99	216	0
CA10055_01	putative transcription factor	7513	6964	0	12606	4509	0	8079	4421	0	3614	4581	0	12236	16228	0	14365	14094	0	11497	7559	0	19075	12728	0	13529	28592	0	12211	30096	0	3055	29398	0	13736	16015	0	18746	28161	0
CA10125_01	polyubiquitin	13651	18641	0	54838	27105	0	20021	9514	0	15013	18028	0	37214	43064	0	30334	27681	0	30260	27837	0	41731	26723	0	30415	49994	0	18958	49336	0	8625	43345	0	18270	27555	0	34211	49689	0
Empty	Empty	8	7	-50	39	170	-50	5	26	-50	2	23	-50	20	28	-50	15	29	-50	86	60	-50	29	55	-50	35	62	-50	111	289	0	30	72	-50	50	69	-50	19	59	-50
Empty	Empty	8	14	0	65	148	-50	18	23	-50	8	36	-50	30	51	-50	14	25	-50	233	252	0	66	146	0	22	46	-50	78	311	0	65	189	0	186	175	0	19	60	-50
cac01	Randomly generated negative control	-8	-9	-50	12	101	-50	1	16	-50	-3	29	-50	-20	38	-50	31	27	-50	-10	9	-50	3	11	-50	3	18	-50	7	20	-50	-2	12	-50	60	74	-50	4	33	-50
cac03	Randomly generated negative control	-3	15	-50	33	364	0	-3	29	-50	2	109	0	-5	95	-50	21	142	0	-8	46	-50	-1	43	-50	4	69	0	3	6	-50	5	171	0	4	100	0	3	143	0
cac05	Randomly generated negative control	-16	-9	-50	11	59	0	-10	-2	-50	-11	21	-50	-23	29	-50	-2	25	-50	-19	-10	-50	-18	-2	-50	-9	5	-50	-7	-24	-50	6	17	-50	-16	-3	-50	-8	4	-50
cac07	Randomly generated negative control	-21	-10	-50	3	76	-50	-11	11	-50	-4	29	-50	-23	33	-50	2	16	-50	-21	-10	-50	-19	-16	-50	-4	13	-50	-4	6	-50	-2	15	-50	-3	11	-50	-5	15	-50
cac09	Randomly generated negative control	-23	-5	-50	-2	53	-50	-11	11	-50	-5	36	-50	-22	32	-50	-4	23	-50	-16	-5	-50	-18	-11	-50	-10	14	-50	-5	9	-50	-3	18	-50	9	14	-50	-10	7	-50
cac11	Randomly generated negative control	-11	-1	-50	8	55	-50	11	26	-50	0	37	-50	-15	52	-50	35	27	-50	-10	-1	-50	-9	-4	-50	13	43	-50	10	18	-50	9	51	-50	21	27	-50	12	48	-50
cac01	Randomly generated negative control	-13	-13	-50	-3	39	-50	-5	10	-50	0	43	-50	-10	55	-50	30	19	-50	-16	7	-50	-5	14	-50	12	27	-50	-2	10	-50	14	61	-50	49	52	-50	16	66	-50
cac03	Randomly generated negative control	-14	-2	-50	0	89	-50	-8	20	-50	-2	81	0	-17	113	-50	46	48	0	-12	45	-50	-10	45	-50	1	62	-50	-10	21	-50	31	184	0	6	44	-50	-5	72	-50
cac05	Randomly generated negative control	-14	-5	-50	-13	17	-50	-16	2	-50	-3	25	-50	-31	26	-50	12	12	-50	-19	7	-50	-13	5	-50	-8	13	-50	-15	12	-50	-3	5	-50	-11	6	-50	-6	15	-50
cac07	Randomly generated negative control	55	44	0	-4	40	-50	-13	7	-50	-4	34	-50	-32	38	-50	7	13	-50	-21	6	-50	-19	-2	-50	-4	23	-50	-17	-33	-50	0	9	-50	-15	14	-50	-10	23	-50
cac09	Randomly generated negative control	-18	12	-50	-6	-2	-50	-11	18	-50	-5	35	-50	-24	33	-50	-2	25	-50	-17	25	-50	-15	-2	-50	-8	39	-50	-21	-17	-50	-3	39	-50	-1	19	-50	-9	14	-50
cac11	Randomly generated negative control	6	12	-50	1	26	-50	11	27	-50	0	42	-50	1	60	-50	41	25	0	-7	11	-50	9	30	-50	13	34	-50	18	35	-50	9	50	-50	17	42	-50	32	74	-50
cac01	Randomly generated negative control	-1	-1	-50	-16	16	-50	-5	11	-50	-7	38	-50	-13	49	-50	45	7	-50	-10	4	-50	-6	10	-50	8	31	-50	-5	136	-50	7	27	-50	25	30	-50	14	56	-50
cac03	Randomly generated negative control	-3	3	-50	5	101	-50	-10	16	-50	2	39	-50	-13	65	-50	48	32	0	-11	25	-50	-4	14	-50	-5	20	-50	-11	49	-50	89	279	0	2	38	-50	-7	36	-50
cac05	Randomly generated negative control	-18	-3	-50	-1	32	-50	-15	6	-50	-9	26	-50	-28	39	-50	12	1	-50	-18	9	-50	-17	-15	-50	-10	13	-50	-17	-20	-50	8	34	-50	-8	-3	-50	-14	2	-50
cac07	Randomly generated negative control	-21	-4	-50	31	109	-50	-11	8	-50	-8	37	-50	-22	30	-50	9	3	-50	-16	6	-50	-12	0	-50	-10	9	-50	-20	-33	-50	-6	6	-50	-14	1	-50	-13	4	-50
cac09	Randomly generated negative control	-24	-4	-50	-4	50	-50	-11	19	-50	-6	35	-50	-16	35	-50	0	4	-50	-19	1	-50	-13	-2	-50	-11	13	-50	-17	-17	-50	-1	13	-50	102	9	-50	-16	-5	-50
cac11	Randomly generated negative control	-11	20	-50	9	8	-50	4	20	-50	0	38	-50	-8	41	-50	34	37	-50	-2	11	-50	-1	25	-50	10	46	-50	5	51	-50	6	43	-50	7	24	-50	17	38	-50
cac01	Randomly generated negative control	-10	3	-50	-7	8	-50	5	19	-50	-4	24	-50	-5	50	-50	69	24	0	-11	12	-50	4	5	-50	16	44	-50	15	32	-50	11	52	-50	47	47	-50	18	54	-50
cac03	Randomly generated negative control	-5	8	-50	6	62	-50	-7	25	-50	-2	65	-50	-5	59	-50	44	50	0	-12	23	-50	-11	21	-50	-3	27	-50	-11	-21	-50	3	22	-50	-2	33	-50	-10	4	-50
cac05	Randomly generated negative control	-21	-5	-50	-8	4	-50	-17	4	-50	-10	35	-50	-19	28	-50	5	12	-50	-19	-4	-50	-18	-5	-50	-11	0	-50	-14	-17	-50	-5	-9	-50	-8	16	-50	-17	-6	-50
cac07	Randomly generated negative control	-7	8	-50	-11	-1	-50	-17	5	-50	-8	23	-50	-19	46	-50	3	13	-50	-22	3	-50	-14	-10	-50	-10	16	-50	-16	-11	-50	3	27	-50	-21	-11	-50	-17	-26	-50
cac09	Randomly generated negative control	-14	-1	-50	-6	-1	-50	-17	8	-50	-6	41	-50	-20	27	-50	-6	20	-50	-15	0	-50	-17	-1	-50	-9	7	-50	-11	23	-50	-4	7	-50	-18	-14	-50	-15	-6	-50
cac11	Randomly generated negative control	-3	2	-50	-12	-25	-50	-4	23	-50	-2	36	-50	-1	61	-50	22	30	-50	-8	14	-50	-8	4	-50	6	30	-50	11	92	-50	4	37	-50	-8	-7	-50	7	12	-50
CA10008_01	serine/threonine kinase	536	435	0	1169	855	0	158	226	0	76	320	0	0	663	0	715	558	0	680	843	0	670	797	0	761	1474	0	199	1160	0	63	729	0	156	703	0	554	1436	0
CA10188_01	elongation factor 1-alpha (TEF-2)	65399	53716	0	62083	57725	0	35587	16372	0	22634	34553	0	0	64190	0	60917	60018	0	62392	28184	0	63583	47044	0	63404	60335	0	61141	59852	0	15310	60158	0	38569	44252	0	48047	47159	0
CA10190_01	peptidyl-prolyl cis-trans isomerase	16256	19981	0	30297	30493	0	5657	2916	0	2895	4764	0	0	12531	0	14150	22200	0	21005	16190	0	18607	12055	0	20028	21630	0	12903	15781	0	2776	8785	0	4013	5361	0	10908	15619	0
CA10042_01	protein kinase	2054	664	0	2264	1029	0	574	305	0	346	649	0	0	1095	0	1419	385	0	2190	774	0	1950	1108	0	2024	2602	0	258	2263	0	143	1437	0	387	891	0	956	2187	0
CA10026_01	chitin synthase 2	1246	488	0	2050	14	0	276	172	0	142	172	0	0	799	0	1109	564	0	1583	826	0	1475	927	0	1478	1486	0	278	1392	0	286	795	0	194	496	0	519	1507	0
CA10183_01	rapamycin-binding protein	7333	8536	0	8416	8124	0	1906	840	0	1667	2179	0	0	3688	0	4713	6713	0	8463	4593	0	7472	2995	0	8441	8327	0	4593	5665	0	719	4324	0	1177	1880	0	3914	4998	0
CA00691_01	CA00691_01	306	221	0	292	-98	-50	90	121	0	30	117	0	0	310	0	401	245	0	346	292	0	357	333	0	334	412	0	79	315	0	48	297	0	66	146	0	159	383	0
CA00693_01	CA00693_01	1486	744	0	1640	371	0	330	265	0	231	328	0	0	741	0	920	803	0	1502	1343	0	1214	1526	0	1126	1970	0	255	1053	0	144	877	0	287	442	0	704	1237	0
CA00695_01	CA00695_01	2145	1012	0	2426	681	0	555	345	0	256	636	0	0	1094	0	1509	752	0	1963	452	0	2133	1522	0	2219	3185	0	417	1715	0	80	1343	0	324	620	0	1289	1862	0
CA00697_01	CA00697_01	2079	1452	0	2535	1770	0	506	338	0	272	548	0	0	1167	0	1779	1598	0	2153	1864	0	2390	1672	0	2427	3067	0	707	1554	0	274	1183	0	311	527	0	1029	1542	0
CA00699_01	CA00699_01	1325	364	0	1987	564	0	351	184	0	116	293	0	0	857	0	1504	301	0	1113	414	0	1522	736	0	1337	1600	0	183	1013	0	36	695	0	142	378	0	643	1052	0
CA00701_01	CA00701_01	4	117	0	-11	319	-50	-7	237	0	-5	211	0	0	423	0	6	69	0	3	175	0	-2	122	-50	0	192	0	-7	168	0	3	216	0	-29	233	0	-16	150	0
CA11003_01	CA11003_01	117	130	0	103	130	0	43	95	0	13	88	0	0	240	0	163	288	0	141	221	0	235	239	0	174	427	0	119	318	0	49	313	0	35	106	0	116	230	0
CA00714_01	CA00714_01	9	39	0	25	125	-50	-4	59	0	-2	60	-50	0	162	0	14	-122	-50	23	84	0	19	56	-50	14	62	-50	16	89	0	4	50	-50	-14	42	-50	-7	42	-50
CA11004_01	CA11004_01	6	33	-50	21	160	-50	-3	44	-50	-4	36	-50	0	129	0	21	-72	-50	13	67	0	73	165	0	13	71	-50	6	49	-50	2	34	-50	-24	10	-50	-15	0	-50
CA00716_01	CA00716_01	498	340	0	671	2081	0	92	153	0	69	187	0	0	353	0	403	235	0	336	491	0	399	394	0	389	558	0	91	259	0	79	214	0	74	124	0	157	298	0
CA00718_01	CA00718_01	809	941	0	1126	642	0	160	156	0	87	208	0	0	478	0	886	708	0	673	285	0	692	719	0	679	1091	0	399	664	0	46	401	0	167	225	0	330	650	0
CA00720_01	CA00720_01	1637	1918	0	2213	2069	0	366	269	0	333	363	0	0	774	0	1095	1962	0	1337	1139	0	1254	1229	0	1288	1582	0	780	1110	0	179	726	0	293	393	0	564	1000	0
CA00731_01	CA00731_01	156	141	0	258	442	0	37	87	0	14	77	-50	0	222	0	159	84	0	133	143	0	134	140	0	135	229	0	49	169	0	22	87	-50	30	71	0	36	117	0
CA00464_01	CA00464_01	4	27	-50	23	152	-50	-4	34	-50	-3	45	-50	0	142	0	5	32	-50	7	34	-50	8	19	-50	-3	23	-50	2	2	-50	0	1	-50	-17	13	-50	-13	2	-50
CA00734_01	CA00734_01	667	904	0	1031	1525	0	125	133	0	78	149	0	0	359	0	425	935	0	441	1092	0	466	630	0	396	760	0	255	339	0	124	323	0	109	152	0	116	268	0
CA00736_01	CA00736_01	543	493	0	795	438	0	103	103	0	39	137	0	0	339	0	368	350	0	384	327	0	464	474	0	316	623	0	187	451	0	52	367	0	88	195	0	157	374	0
CA00738_01	CA00738_01	185	204	0	227	344	0	31	50	-50	16	95	0	0	189	0	114	85	-50	113	144	0	119	125	0	89	179	0	61	105	0	13	95	-50	-1	32	-50	28	76	-50
CA00740_01	CA00740_01	1322	2101	0	1229	983	0	226	222	0	83	263	0	0	521	0	1008	2622	0	1014	607	0	960	1124	0	725	1214	0	872	819	0	98	682	0	271	278	0	321	549	0
CA01015_01	CA01015_01	1550	1579	0	2008	1083	0	446	231	0	453	614	0	0	966	0	1202	1316	0	1918	1029	0	1481	1066	0	1617	2346	0	755	1619	0	200	1266	0	276	601	0	1224	2078	0
CA01017_01	CA01017_01	-4	32	-50	-33	-188	-50	-11	40	-50	-4	47	-50	0	95	-50	310	111	0	-11	46	-50	-10	20	-50	3	51	-50	-18	10	-50	-4	18	-50	-69	-29	-50	-13	19	-50
CA01019_01	CA01019_01	11	29	-50	-63	-213	-50	-6	47	-50	-2	81	-50	0	132	0	98	35	-50	-1	63	-50	9	34	-50	30	103	-50	-6	34	-50	3	54	-50	-45	-12	-50	-15	23	-50
CA01021_01	CA01021_01	531	731	0	338	387	0	100	126	0	122	221	0	0	380	0	409	510	0	538	409	0	477	375	0	462	589	0	297	429	0	61	327	0	54	119	0	215	418	0
CA01023_01	CA01023_01	159	303	0	273	-387	-50	13	49	-50	4	54	0	0	225	0	716	450	0	256	244	0	302	490	0	229	471	0	155	227	0	21	182	0	97	153	0	91	249	0
CA01025_01	CA01025_01	309	376	0	195	-309	-50	49	76	0	56	144	0	0	266	0	180	249	0	222	171	0	214	187	0	203	361	0	166	239	0	17	175	0	14	74	-50	106	199	0
CA01039_01	CA01039_01	333	172	0	203	-61	-50	37	90	0	45	119	0	0	266	0	1312	687	0	330	437	0	279	319	0	304	558	0	76	439	0	71	675	0	49	459	0	141	691	0
CA01041_01	CA01041_01	396	264	0	337	-192	-50	73	275	0	73	170	0	0	296	0	493	533	0	650	100	0	633	353	0	567	1355	0	210	821	0	24	643	0	341	268	0	214	763	0
CA01043_01	CA01043_01	394	475	0	475	173	0	83	119	0	58	133	0	0	328	0	499	491	0	300	289	0	309	576	0	270	587	0	204	334	0	40	281	0	112	95	0	149	357	0
CA01045_01	CA01045_01	3119	883	0	3980	15315	0	530	98	0	500	806	0	0	1458	0	2710	1065	0	3373	13451	0	3846	482	0	4041	4408	0	425	2469	0	2427	1693	0	76	615	0	1371	1569	0
CA01047_01	CA01047_01	1891	1487	0	2019	1687	0	388	240	0	405	504	0	0	825	0	1039	1328	0	1619	1918	0	1764	1416	0	1620	2142	0	724	1378	0	267	983	0	368	613	0	782	1481	0
CA01049_01	CA01049_01	1294	1534	0	1399	637	0	250	250	0	285	375	0	0	688	0	1079	1407	0	1065	780	0	1406	1916	0	1176	1987	0	678	1364	0	101	727	0	297	325	0	545	987	0
CA01063_01	CA01063_01	2069	3685	0	2598	1061	0	457	432	0	475	750	0	0	1109	0	1362	3068	0	2109	612	0	2151	2258	0	2407	3477	0	1576	1726	0	116	1497	0	510	626	0	1206	1646	0
CA01065_01	CA01065_01	693	587	0	891	1230	0	176	151	0	151	292	0	0	490	0	553	373	0	680	648	0	778	641	0	776	1083	0	200	562	0	94	437	0	88	165	0	247	411	0
CA01067_01	CA01067_01	54	137	0	154	264	0	6	59	-50	-8	45	-50	0	154	0	67	24	-50	48	85	0	69	122	0	64	165	0	20	3	-50	2	55	-50	-20	28	-50	-4	32	-50
CA00475_01	CA00475_01	426	407	0	495	1033	0	43	83	0	33	130	0	0	261	0	389	381	0	293	363	0	320	368	0	330	454	0	126	236	0	68	179	0	10	47	-50	60	185	0
CA01070_01	CA01070_01	704	617	0	951	1030	0	102	267	0	51	473	0	0	655	0	623	565	0	423	523	0	632	761	0	321	862	0	241	811	0	46	732	0	73	456	0	190	692	0
CA01072_01	CA01072_01	-3	2	-50	16	198	-50	-12	24	-50	-10	39	-50	0	96	-50	76	104	0	0	37	-50	0	27	-50	-3	32	-50	-2	-1	-50	-6	8	-50	-34	1	-50	-25	-21	-50
CA01086_01	CA01086_01	529	891	0	701	501	0	99	133	0	94	201	0	0	321	0	325	648	0	371	156	0	337	436	0	341	522	0	323	443	0	18	278	0	69	123	0	140	338	0
CA01088_01	CA01088_01	881	1240	0	1378	1842	0	127	284	0	74	500	0	0	733	0	461	1149	0	479	835	0	522	1053	0	409	1069	0	345	745	0	107	564	0	109	425	0	150	591	0
CA01090_01	CA01090_01	1686	1540	0	2036	966	0	262	218	0	308	464	0	0	540	0	996	1274	0	1100	586	0	1033	1101	0	823	1441	0	472	1105	0	54	827	0	202	352	0	218	644	0
CA01092_01	CA01092_01	918	824	0	1121	563	0	126	109	0	131	194	0	0	341	0	496	707	0	510	611	0	521	626	0	378	854	0	226	561	0	102	392	0	75	133	0	86	309	0
CA01094_01	CA01094_01	4326	3833	0	5594	2204	0	1010	756	0	1314	1046	0	0	2125	0	3277	6009	0	3501	4137	0	2653	3811	0	2545	4052	0	1457	2861	0	861	2975	0	1203	1134	0	1413	2730	0
CA01096_01	CA01096_01	802	724	0	1022	786	0	121	113	0	68	194	0	0	369	0	431	486	0	451	220	0	445	391	0	329	669	0	184	587	0	35	452	0	78	176	0	138	364	0
CA01378_01	CA01378_01	-2	18	-50	-3	27	-50	-2	46	-50	-5	63	-50	0	87	0	89	20	-50	-17	38	-50	-6	6	-50	-2	42	-50	-12	-6	-50	8	28	-50	-41	6	-50	-17	18	-50
CA01380_01	CA01380_01	-6	20	-50	-38	-163	-50	-6	44	-50	-8	56	-50	0	108	0	121	6	-50	-19	50	-50	-14	24	-50	-9	31	-50	-17	-14	-50	-2	108	-50	-61	-10	-50	-23	22	-50
CA01382_01	CA01382_01	926	1153	0	911	337	0	217	173	0	230	310	0	0	617	0	599	928	0	991	462	0	835	845	0	823	1175	0	521	869	0	70	685	0	136	244	0	515	755	0
CA01384_01	CA01384_01	1714	2432	0	1586	320	0	318	178	0	383	490	0	0	929	0	902	1941	0	1449	816	0	1248	875	0	1272	1796	0	1069	1092	0	110	750	0	205	341	0	660	996	0
CA01386_01	CA01386_01	1301	1712	0	1321	1003	0	230	240	0	211	407	0	0	813	0	802	1101	0	1106	623	0	1058	918	0	1025	1357	0	553	758	0	93	602	0	185	298	0	490	760	0
CA00490_01	CA00490_01	370	327	0	287	234	-50	54	241	0	59	183	0	0	312	0	763	1043	0	773	275	0	823	225	0	745	1491	0	389	734	0	59	556	0	244	243	0	226	654	0
CA01401_01	CA01401_01	2552	4512	0	2398	1180	0	425	421	0	499	757	0	0	1219	0	1320	3552	0	2184	965	0	1816	1622	0	2021	2299	0	1369	1175	0	128	1086	0	311	351	0	746	1169	0
CA01403_01	CA01403_01	3909	3213	0	4119	7410	0	797	599	0	854	1348	0	0	1937	0	2691	2618	0	3649	3179	0	3642	2598	0	3335	3869	0	1361	2883	0	502	1949	0	500	795	0	1390	2405	0
CA01405_01	CA01405_01	127	54	0	84	-146	-50	26	44	0	13	93	0	0	189	0	141	-6	-50	141	37	0	140	128	0	138	238	0	-4	201	0	6	200	0	26	71	-50	65	179	0
CA01407_01	CA01407_01	602	642	0	646	704	0	114	153	0	101	159	0	0	396	0	742	543	0	448	428	0	547	641	0	538	611	0	222	482	0	76	399	0	93	159	0	158	443	0
CA01409_01	CA01409_01	-3	22	-50	-23	-98	-50	0	40	-50	-7	62	-50	0	126	0	24	-71	-50	10	47	-50	16	29	-50	4	73	-50	3	62	-50	0	86	-50	-14	32	-50	-10	37	-50
CA01411_01	CA01411_01	880	1481	0	1003	609	0	192	199	0	202	358	0	0	572	0	607	1150	0	784	445	0	960	917	0	812	1424	0	578	843	0	45	550	0	186	284	0	441	830	0
CA01425_01	CA01425_01	80	103	0	66	431	0	12	53	0	9	60	-50	0	160	0	1063	521	0	107	344	0	110	184	0	135	209	0	102	179	0	49	84	0	-5	35	-50	44	75	-50
CA01427_01	CA01427_01	1966	1885	0	2223	869	0	462	292	0	550	596	0	0	1022	0	1411	2051	0	1842	1278	0	2147	2037	0	1993	3457	0	923	1870	0	192	1403	0	470	657	0	909	1792	0
CA01429_01	CA01429_01	0	23	-50	32	185	-50	208	20	0	-20	33	-50	0	131	0	187	2	-50	10	62	-50	11	44	-50	5	54	-50	-11	6	-50	-4	14	-50	330	42	0	-5	-13	-50
CA01431_01	CA01431_01	691	730	0	704	1673	0	116	161	0	118	234	0	0	393	0	372	513	0	500	529	0	452	554	0	508	703	0	180	393	0	92	322	0	107	164	0	185	412	0
CA01433_01	CA01433_01	2285	969	0	2489	782	0	411	230	0	429	562	0	0	950	0	1538	758	0	1764	612	0	1718	1242	0	1551	2230	0	311	1506	0	89	1178	0	283	619	0	855	1496	0
CA01435_01	CA01435_01	2831	731	0	4874	591	0	579	347	0	585	839	0	0	1342	0	1949	366	0	2224	223	0	2153	1154	0	1783	4324	0	92	1696	0	21	1245	0	204	610	0	1168	1464	0
CA01449_01	CA01449_01	125	190	0	258	243	0	5	38	-50	4	65	-50	0	147	0	308	72	0	113	76	0	74	120	0	61	137	0	65	98	0	1	37	-50	-21	41	-50	20	71	-50
CA01451_01	CA01451_01	1121	1313	0	1604	1154	0	158	227	0	183	333	0	0	504	0	799	938	0	875	595	0	843	897	0	702	928	0	331	717	0	103	611	0	136	220	0	253	601	0
CA01453_01	CA01453_01	2959	2230	0	2915	3818	0	644	352	0	409	480	0	0	825	0	3336	2432	0	2319	2277	0	1965	1262	0	1688	2064	0	917	1815	0	277	1218	0	326	397	0	598	1138	0
CA01455_01	CA01455_01	54	66	0	94	134	-50	0	31	-50	1	60	-50	0	132	0	42	-42	-50	57	75	0	42	90	0	36	85	-50	4	87	-50	0	28	-50	-17	5	-50	-7	33	-50
CA01457_01	CA01457_01	-3	5	-50	24	114	-50	-11	21	-50	-12	38	-50	0	125	0	6	-28	-50	14	41	-50	1	31	-50	-5	34	-50	-17	1	-50	-12	-11	-50	-35	5	-50	-27	11	-50
CA00491_01	CA00491_01	972	1539	0	1291	670	0	173	180	0	88	251	0	0	428	0	662	1194	0	679	203	0	696	502	0	610	933	0	602	633	0	31	510	0	163	225	0	273	548	0
CA01747_01	CA01747_01	10	24	0	13	-46	-50	-1	46	-50	2	56	-50	0	76	0	233	52	0	-7	37	-50	5	14	-50	5	51	-50	-8	6	-50	9	39	-50	-47	4	-50	-9	42	-50
CA01749_01	CA01749_01	278	407	0	281	-75	-50	75	115	0	68	152	0	0	332	0	257	353	0	289	209	0	304	354	0	249	556	0	167	378	0	26	308	0	60	94	-50	218	434	0
CA01751_01	CA01751_01	16	11	-50	-41	67	-50	-2	31	-50	-1	44	-50	0	119	0	154	28	0	33	226	0	40	39	-50	37	58	-50	-16	3	-50	22	50	-50	-48	-1	-50	6	32	-50
CA01753_01	CA01753_01	349	518	0	342	-160	-50	202	167	0	140	261	0	0	711	0	778	932	0	638	363	0	1297	689	0	694	1586	0	699	1827	0	138	1349	0	241	329	0	605	1396	0
CA01755_01	CA01755_01	715	725	0	608	43	0	176	200	0	163	270	0	0	529	0	491	659	0	659	554	0	685	885	0	653	818	0	310	647	0	68	431	0	171	210	0	311	606	0
CA01757_01	CA01757_01	844	790	0	769	636	0	179	299	0	175	336	0	0	602	0	686	975	0	984	1386	0	945	1794	0	857	1295	0	303	858	0	212	626	0	567	266	0	354	757	0
CA01771_01	CA01771_01	-9	11	-50	-96	-400	-50	-14	37	-50	-13	44	-50	0	135	0	90	28	-50	-19	45	-50	-12	31	-50	-14	38	-50	-9	13	-50	-1	43	-50	-36	39	-50	-10	48	-50
CA01773_01	CA01773_01	-14	3	-50	-76	-402	-50	-14	37	-50	-8	57	-50	0	119	0	103	3	-50	-15	31	-50	2	19	-50	-9	32	-50	-16	14	-50	-3	38	-50	-33	11	-50	25	44	-50
CA01775_01	CA01775_01	290	51	0	274	-145	-50	56	60	0	60	135	0	0	261	0	299	-30	0	549	83	0	593	123	0	547	439	0	17	390	0	22	322	0	35	171	0	277	428	0
CA01777_01	CA01777_01	-6	1	-50	-28	-77	-50	-11	37	-50	-8	30	-50	0	86	-50	383	218	0	10	71	-50	14	27	-50	2	33	-50	0	26	-50	5	30	-50	-22	7	-50	-11	30	-50
CA01779_01	CA01779_01	253	264	0	211	75	-50	36	57	0	31	125	0	0	237	0	132	65	0	186	107	0	235	262	0	168	317	0	101	240	0	17	181	0	4	66	-50	71	205	0
CA01781_01	CA01781_01	64	46	0	61	17	-50	8	45	-50	4	47	-50	0	159	0	59	-5	0	77	124	0	104	109	0	75	106	0	8	86	-50	1	64	-50	-26	29	-50	4	51	-50
CA01795_01	CA01795_01	-9	10	-50	71	750	-50	-7	35	-50	-15	38	-50	0	113	0	29	-29	-50	-5	35	-50	-19	3	-50	-11	30	-50	-9	4	-50	-5	31	-50	-48	4	-50	-33	-28	-50
CA01797_01	CA01797_01	300	200	0	265	628	0	51	92	0	48	117	0	0	232	0	222	20	0	197	239	0	262	226	0	230	337	0	70	206	0	26	140	0	-2	75	-50	73	127	0
CA01799_01	CA01799_01	1465	1469	0	1510	899	0	276	192	0	313	331	0	0	719	0	1024	1293	0	1145	789	0	1210	1181	0	1249	1595	0	580	1232	0	96	746	0	242	421	0	502	926	0
CA01801_01	CA01801_01	1030	1115	0	1019	1310	0	197	176	0	204	323	0	0	545	0	602	813	0	742	461	0	751	539	0	728	1001	0	447	646	0	78	484	0	163	291	0	364	594	0
CA01803_01	CA01803_01	-14	11	-50	7	126	-50	-12	27	-50	-13	46	-50	0	84	0	7	71	0	-5	36	-50	-6	22	-50	-14	16	-50	-8	21	-50	-8	10	-50	-42	17	-50	-24	-1	-50
CA01805_01	CA01805_01	106	29	0	177	215	0	13	36	-50	16	57	-50	0	156	0	125	-87	-50	107	117	0	125	102	0	89	158	0	2	116	-50	5	39	-50	-29	29	-50	17	52	-50
CA01819_01	CA01819_01	582	734	0	1016	1502	0	112	138	0	120	211	0	0	343	0	516	525	0	503	765	0	555	627	0	416	521	0	258	458	0	120	304	0	87	146	0	131	343	0
CA01821_01	CA01821_01	3	35	0	34	196	-50	-10	36	-50	-13	37	-50	0	118	0	294	51	0	52	83	0	19	54	-50	-6	21	-50	3	25	-50	-2	-3	-50	-35	12	-50	-16	10	-50
CA01823_01	CA01823_01	1089	1528	0	1127	1417	0	225	186	0	246	398	0	0	535	0	840	1384	0	915	587	0	867	747	0	667	965	0	754	743	0	55	570	0	165	277	0	179	466	0
CA01825_01	CA01825_01	-4	13	0	14	62	-50	-15	28	-50	-15	42	-50	0	119	0	14	-68	-50	4	36	-50	-4	26	-50	-12	7	-50	-16	-2	-50	-14	-33	-50	-51	-16	-50	-25	10	-50
CA01827_01	CA01827_01	5371	6236	0	6501	3152	0	998	536	0	1102	1349	0	0	1596	0	3798	4630	0	4135	1242	0	3946	2422	0	3177	4614	0	2422	4104	0	240	2807	0	666	1360	0	1261	2495	0
CA01829_01	CA01829_01	811	1195	0	1254	739	0	123	158	0	63	176	0	0	348	0	623	935	0	471	326	0	383	666	0	325	680	0	315	595	0	56	437	0	158	181	0	160	432	0
CA02118_01	CA02118_01	869	74	0	1083	107	0	254	110	0	217	385	0	0	671	0	957	27	0	1436	265	0	1289	372	0	1167	1277	0	14	1367	0	53	918	0	39	454	0	933	1404	0
CA02120_01	CA02120_01	837	1959	0	945	217	0	247	209	0	200	362	0	0	732	0	712	1283	0	902	527	0	976	836	0	794	1439	0	726	889	0	100	725	0	276	351	0	524	965	0
CA02122_01	CA02122_01	1553	1609	0	3053	2475	0	364	285	0	179	479	0	0	1507	0	2103	1628	0	1969	1680	0	2407	1830	0	2004	2831	0	666	1842	0	235	1354	0	373	715	0	1242	2040	0
CA00508_01	CA00508_01	4868	6954	0	5031	2312	0	1311	811	0	1339	1486	0	0	3106	0	3012	7835	0	5080	3252	0	4492	5419	0	4526	6957	0	4305	4576	0	486	3153	0	1553	1808	0	2718	4279	0
CA02125_01	CA02125_01	2043	1417	0	2748	1192	0	500	361	0	439	647	0	0	1694	0	1997	1805	0	2192	2044	0	3426	2473	0	2432	3973	0	1250	3128	0	404	2763	0	606	796	0	1443	2612	0
CA02127_01	CA02127_01	884	964	0	813	54	0	184	157	0	197	293	0	0	560	0	668	702	0	804	403	0	903	789	0	768	1208	0	446	849	0	84	638	0	188	294	0	396	804	0
CA02141_01	CA02141_01	260	260	0	142	-361	-50	49	77	0	57	129	0	0	283	0	295	241	0	201	106	0	236	258	0	191	428	0	114	277	0	17	265	0	70	187	0	120	316	0
CA02143_01	CA02143_01	-14	11	-50	-76	-342	-50	-13	28	-50	-13	43	-50	0	113	0	619	194	0	7	41	-50	31	86	0	17	72	-50	4	29	0	0	41	-50	-8	35	-50	0	29	-50
CA02145_01	CA02145_01	31	39	0	25	2	-50	2	29	-50	-2	46	-50	0	146	0	644	109	0	44	392	0	77	121	0	62	155	0	22	62	0	56	89	0	-7	47	-50	11	62	-50
CA02147_01	CA02147_01	976	866	0	992	580	0	160	130	0	147	268	0	0	521	0	570	353	0	496	440	0	610	592	0	629	965	0	192	475	0	60	383	0	91	179	0	228	418	0
CA02149_01	CA02149_01	18	28	0	-19	18	-50	1	48	-50	-2	58	-50	0	144	0	259	19	0	7	82	-50	8	33	-50	24	80	-50	-8	23	-50	11	74	-50	-17	51	-50	-11	39	-50
CA00509_01	CA00509_01	2947	5814	0	2625	1272	0	617	550	0	738	1107	0	0	1302	0	1483	3275	0	2297	461	0	2410	2162	0	2439	3117	0	1940	1721	0	65	1276	0	730	730	0	1258	1758	0
CA02161_01	CA02161_01	1454	943	0	1474	2159	0	315	244	0	285	452	0	0	726	0	821	441	0	893	781	0	1112	851	0	1060	1455	0	255	845	0	122	743	0	225	416	0	520	824	0
CA02163_01	CA02163_01	112	160	0	125	266	0	32	65	0	15	87	0	0	197	0	128	26	0	106	155	0	115	163	0	115	243	0	72	154	0	23	169	0	12	79	-50	45	88	0
CA02164_01	CA02164_01	55	84	0	75	260	0	3	70	0	-8	68	-50	0	188	0	34	-32	-50	24	130	0	32	47	-50	25	115	0	1	63	-50	4	62	-50	-31	51	-50	-7	43	-50
CA02166_01	CA02166_01	424	430	0	573	1192	0	85	123	0	70	181	0	0	358	0	742	482	0	311	473	0	397	380	0	339	558	0	146	372	0	78	232	0	59	164	0	169	352	0
CA02168_01	CA02168_01	1015	1227	0	1543	924	0	191	178	0	181	289	0	0	576	0	687	800	0	737	531	0	790	875	0	667	1124	0	387	767	0	86	538	0	167	281	0	354	807	0
CA02170_01	CA02170_01	467	273	0	758	519	0	97	104	0	123	187	0	0	305	0	365	110	0	434	402	0	449	463	0	337	494	0	71	434	0	43	299	0	31	184	0	175	427	0
CA02183_01	CA02183_01	-2	76	0	44	254	0	3	73	-50	-14	134	0	0	218	0	59	-24	-50	6	88	-50	36	132	0	-1	55	-50	-5	50	-50	-11	72	-50	-52	64	-50	-24	60	-50
CA02185_01	CA02185_01	853	862	0	1586	2862	0	211	218	0	249	374	0	0	637	0	548	682	0	732	1671	0	720	846	0	685	983	0	208	630	0	290	655	0	135	324	0	232	627	0
CA02187_01	CA02187_01	391	300	0	698	1395	0	83	142	0	89	210	0	0	327	0	337	253	0	386	874	0	374	514	0	293	487	0	74	432	0	70	355	0	54	169	0	78	319	0
CA02189_01	CA02189_01	1004	1434	0	1511	1606	0	224	258	0	255	350	0	0	569	0	737	1202	0	795	880	0	830	864	0	639	778	0	459	690	0	145	540	0	161	268	0	179	497	0
CA02191_01	CA02191_01	-12	9	-50	15	99	-50	-14	22	-50	-21	39	-50	0	99	-50	9	-22	-50	1	41	-50	6	37	-50	-14	10	-50	-14	-19	-50	-10	-10	-50	-47	2	-50	-31	-1	-50
CA02193_01	CA02193_01	115	131	-50	103	471	0	56	128	0	19	39	-50	0	44	-50	9	-7	-50	49	87	0	14	32	-50	13	37	-50	59	170	0	18	78	0	28	24	-50	121	277	0
CA02475_01	CA02475_01	916	863	0	1277	415	0	253	208	0	238	308	0	0	772	0	834	802	0	942	838	0	912	1210	0	761	1620	0	475	1148	0	138	910	0	324	439	0	594	1232	0
CA02477_01	CA02477_01	105	201	0	64	54	-50	12	108	0	21	151	0	0	198	0	160	138	0	102	155	0	102	160	0	104	266	0	62	133	-50	7	217	0	-23	119	-50	60	247	0
CA02479_01	CA02479_01	4043	5782	0	5122	3205	0	1016	804	0	1036	1422	0	0	2509	0	2406	4301	0	3604	1506	0	3315	3518	0	3256	5094	0	2283	2687	0	271	2284	0	1059	1288	0	1968	3179	0
CA02481_01	CA02481_01	179	262	0	131	-123	-50	40	114	0	40	129	0	0	246	0	87	273	0	166	192	0	213	257	0	184	346	0	74	205	0	15	211	0	41	128	-50	103	263	0
CA02483_01	CA02483_01	11	22	-50	-62	-264	-50	-4	48	-50	-6	72	-50	0	154	0	148	69	0	-4	57	-50	27	81	-50	0	56	-50	-1	32	-50	-2	67	-50	-34	37	-50	-16	45	-50
CA02485_01	CA02485_01	3129	3438	0	3207	1520	0	839	571	0	909	1042	0	0	2137	0	1817	2566	0	3299	1316	0	3129	2526	0	3266	4413	0	1653	3054	0	247	2500	0	934	1314	0	1863	3238	0
CA02497_01	CA02497_01	198	218	0	88	-162	-50	48	87	0	44	114	0	0	255	0	142	123	0	161	179	0	184	211	0	174	297	0	53	193	0	22	149	0	28	79	-50	81	213	0
CA02499_01	CA02499_01	1648	1392	0	1753	1163	0	384	453	0	360	538	0	0	1182	0	1294	1442	0	1399	1611	0	1548	2137	0	1480	2021	0	501	1507	0	284	1255	0	618	741	0	745	1553	0
CA02501_01	CA02501_01	810	543	0	1011	592	0	158	166	0	152	243	0	0	553	0	495	384	0	639	1201	0	818	854	0	633	1076	0	222	760	0	179	660	0	144	389	0	303	692	0
CA00530_01	CA00530_01	-2	37	-50	-37	58	-50	-4	100	0	-7	134	0	0	186	0	19	131	0	-9	85	-50	-14	61	-50	-9	63	-50	-7	124	-50	1	116	-50	-29	85	-50	53	119	0
CA02504_01	CA02504_01	420	580	0	421	227	0	101	126	0	84	204	0	0	355	0	266	289	0	350	182	0	408	438	0	374	599	0	185	405	0	33	399	0	116	175	0	201	414	0
CA02506_01	CA02506_01	859	895	0	902	1231	0	209	196	0	206	327	0	0	576	0	589	661	0	669	922	0	899	904	0	748	1154	0	313	683	0	135	557	0	210	283	0	404	674	0
CA02520_01	CA02520_01	1129	1288	0	1954	4521	0	280	335	0	123	350	0	0	848	0	997	953	0	889	1492	0	1186	1319	0	1197	1484	0	460	844	0	263	776	0	306	380	0	450	790	0
CA02522_01	CA02522_01	-5	27	-50	15	149	-50	-11	60	-50	-16	68	-50	0	159	0	273	47	0	-5	60	-50	-10	29	-50	-4	55	-50	-2	29	-50	0	38	-50	-44	24	-50	-39	-21	-50
CA02524_01	CA02524_01	731	888	0	787	401	0	152	156	0	141	231	0	0	468	0	400	533	0	513	356	0	565	751	0	486	1033	0	285	689	0	54	575	0	180	299	0	283	622	0
CA02526_01	CA02526_01	677	961	0	817	705	0	173	147	0	169	251	0	0	479	0	363	670	0	508	554	0	542	550	0	446	924	0	369	585	0	78	412	0	135	279	0	269	573	0
CA02528_01	CA02528_01	-17	14	-50	9	172	-50	-13	38	-50	-16	41	-50	0	85	-50	93	-36	-50	-4	42	-50	-2	26	-50	-17	3	-50	-15	15	-50	-9	-4	-50	-22	19	-50	-32	-3	-50
CA02530_01	CA02530_01	372	423	0	648	517	0	81	107	0	90	181	0	0	306	0	275	250	0	304	305	0	319	364	0	221	420	0	111	368	0	38	275	0	32	111	0	105	307	0
CA02544_01	CA02544_01	47	95	0	95	233	0	0	37	-50	2	66	-50	0	137	0	125	31	0	41	89	0	42	82	0	19	66	-50	3	34	-50	5	18	-50	-33	23	-50	-6	43	-50
CA02546_01	CA02546_01	242	783	0	575	683	0	46	127	0	21	178	0	0	277	0	296	609	0	252	203	0	244	317	0	176	324	0	155	181	0	21	205	0	17	110	-50	38	188	0
CA02548_01	CA02548_01	4925	7975	0	7460	2930	0	1204	656	0	1163	1507	0	0	2144	0	4287	6490	0	3576	1386	0	3874	3369	0	2534	3985	0	2604	3711	0	168	3048	0	978	1311	0	991	2402	0
CA02550_01	CA02550_01	21	96	0	46	292	-50	-5	71	-50	-9	152	0	0	201	0	93	40	-50	40	113	0	40	135	0	2	92	-50	2	97	-50	-4	60	-50	-32	58	-50	-17	68	-50
CA02552_01	CA02552_01	285	252	0	519	759	0	60	97	0	52	167	0	0	251	0	238	211	0	260	523	0	241	370	0	180	308	0	54	272	0	86	188	0	42	117	0	50	167	0
CA02554_01	CA02554_01	2118	2573	0	3382	2901	0	497	406	0	305	721	0	0	947	0	1741	2285	0	1422	867	0	1511	1823	0	1115	1875	0	771	1455	0	198	1434	0	618	707	0	513	1166	0
CA02839_01	CA02839_01	-9	25	0	-8	136	-50	-3	124	0	-5	173	0	0	212	0	144	73	0	-5	67	0	-1	88	-50	-7	132	0	-18	83	-50	-3	160	0	-38	109	-50	-13	94	-50
CA02841_01	CA02841_01	2071	2641	0	1983	1639	0	592	568	0	537	917	0	0	1384	0	1218	2039	0	1756	1686	0	1872	1982	0	1537	2192	0	1020	1575	0	294	1442	0	574	828	0	1161	2017	0
CA02843_01	CA02843_01	976	820	0	1158	920	0	263	206	0	254	364	0	0	734	0	764	934	0	809	1339	0	976	1085	0	762	1485	0	360	921	0	184	762	0	268	472	0	609	1102	0
CA02845_01	CA02845_01	704	749	0	719	870	0	182	177	0	189	376	0	0	540	0	560	576	0	742	451	0	732	572	0	658	882	0	267	605	0	72	525	0	128	273	0	370	596	0
CA02847_01	CA02847_01	-5	20	-50	-72	-159	-50	-7	35	-50	-10	49	-50	0	136	0	100	37	0	-9	34	-50	1	43	-50	-5	30	-50	-8	13	-50	-6	30	-50	-36	30	-50	-22	34	-50
CA02849_01	CA02849_01	1063	638	0	1500	1978	0	252	167	0	216	364	0	0	882	0	1370	724	0	1068	1981	0	1279	972	0	1157	1562	0	262	1006	0	294	851	0	204	454	0	684	1039	0
CA02863_01	CA02863_01	460	458	0	456	513	0	141	142	0	87	205	0	0	383	0	348	305	0	359	307	0	447	300	0	412	642	0	147	344	0	49	325	0	94	220	0	244	395	0
CA02865_01	CA02865_01	84	96	0	42	-105	-50	26	67	0	20	107	0	0	151	0	62	134	0	84	126	0	106	103	0	95	171	0	62	102	-50	15	113	-50	15	85	-50	46	156	0
CA02867_01	CA02867_01	12487	832	0	12680	1435	0	2848	709	0	2430	3246	0	0	8664	0	9867	703	0	13040	2433	0	15791	3704	0	12122	17937	0	651	15254	0	524	9773	0	1303	4379	0	7945	11501	0
CA02869_01	CA02869_01	844	1244	0	954	345	0	186	166	0	204	274	0	0	577	0	546	714	0	523	463	0	722	1014	0	667	1223	0	537	690	0	84	612	0	265	321	0	399	819	0
CA02871_01	CA02871_01	2168	2565	0	2254	1036	0	513	348	0	488	629	0	0	1282	0	1332	1575	0	1541	1210	0	2094	1864	0	1537	2930	0	889	1917	0	209	1678	0	559	921	0	725	1779	0
CA02872_01	CA02872_01	86	135	0	86	0	-50	16	56	-50	9	79	0	0	179	0	80	43	-50	80	85	0	108	158	0	83	215	0	41	108	-50	11	185	0	2	69	-50	76	180	0
CA02885_01	CA02885_01	45	130	0	63	95	-50	8	41	-50	4	52	-50	0	153	0	116	73	0	53	76	0	60	106	0	59	133	0	47	68	-50	2	73	-50	-9	34	-50	28	76	-50
CA02887_01	CA02887_01	88	122	0	120	377	0	7	73	0	0	87	0	0	165	0	170	8	0	42	79	0	56	103	0	74	145	0	16	30	-50	11	59	-50	-26	30	-50	33	57	-50
CA02889_01	CA02889_01	1686	1897	0	1768	1220	0	448	283	0	359	609	0	0	1042	0	1139	1085	0	1375	902	0	1388	1006	0	1486	1752	0	633	1363	0	189	1167	0	389	641	0	720	1259	0
CA02891_01	CA02891_01	621	1173	0	654	797	0	124	138	0	146	241	0	0	442	0	590	681	0	454	414	0	448	529	0	381	570	0	401	483	0	77	339	0	115	207	0	181	450	0
CA02893_01	CA02893_01	1599	885	0	2095	2160	0	530	375	0	463	451	0	0	852	0	921	747	0	1035	771	0	1098	1385	0	947	2108	0	711	2266	0	297	1969	0	778	958	0	1422	2582	0
CA02895_01	CA02895_01	611	861	0	1275	741	0	150	160	0	122	292	0	0	403	0	865	649	0	485	265	0	550	612	0	464	651	0	223	453	0	42	399	0	118	208	0	203	453	0
CA02908_01	CA02908_01	217	248	0	397	279	0	44	51	0	47	106	0	0	233	0	145	107	0	153	152	0	157	260	0	88	226	0	79	190	0	8	114	0	11	71	-50	39	165	0
CA02910_01	CA02910_01	439	717	0	728	376	0	101	88	0	91	156	0	0	368	0	321	470	0	356	312	0	439	559	0	193	575	0	235	545	0	40	332	0	75	223	0	89	392	0
CA02912_01	CA02912_01	131	154	0	272	337	0	23	62	0	27	75	-50	0	182	0	107	96	0	140	242	0	155	227	0	106	187	0	24	87	-50	15	149	0	-1	46	-50	12	94	-50
CA02914_01	CA02914_01	286	354	0	465	1063	0	74	98	0	73	168	0	0	256	0	261	218	0	264	302	0	287	240	0	196	266	0	90	260	0	53	171	0	15	92	-50	47	193	0
CA02916_01	CA02916_01	576	441	0	772	643	0	124	136	0	124	210	0	0	346	0	425	325	0	456	337	0	447	491	0	328	472	0	110	394	0	62	362	0	97	147	0	570	268	0
CA02918_01	CA02918_01	21	30	0	55	229	0	-2	35	-50	-10	55	-50	0	127	0	31	19	-50	25	114	0	27	100	0	10	44	-50	0	8	-50	9	31	-50	-23	26	-50	-6	62	-50
CA03199_01	CA03199_01	73	125	0	65	192	-50	22	100	0	24	152	0	0	224	0	106	160	0	83	394	0	123	111	0	76	221	0	61	188	0	59	177	0	17	89	0	60	179	0
CA03201_01	CA03201_01	494	648	0	709	114	0	113	96	0	88	194	0	0	483	0	591	496	0	394	168	0	478	380	0	433	719	0	266	424	0	20	420	0	109	218	0	235	434	0
CA03203_01	CA03203_01	759	912	0	1005	495	0	184	183	0	173	245	0	0	652	0	1532	1088	0	349	519	0	1013	1574	0	963	1683	0	439	1763	0	185	977	0	1518	1281	0	1002	2318	0
CA03205_01	CA03205_01	596	774	0	558	456	0	254	223	0	176	314	0	0	539	0	548	775	0	462	523	0	579	757	0	526	993	0	446	761	0	148	745	0	375	491	0	590	1003	0
CA03207_01	CA03207_01	2249	2450	0	2476	631	0	634	428	0	533	694	0	0	1579	0	1961	2325	0	2234	1128	0	2579	2595	0	2362	3405	0	1186	2312	0	211	2050	0	788	1013	0	1226	2310	0
CA03209_01	CA03209_01	273	283	0	266	124	-50	58	79	0	44	138	0	0	266	0	561	255	0	211	219	0	266	263	0	238	393	0	77	204	0	43	230	0	44	101	-50	114	221	0
CA03223_01	CA03223_01	15	48	0	-46	-156	-50	1	43	-50	-4	61	-50	0	124	0	117	56	0	15	64	-50	11	45	-50	12	75	-50	21	58	-50	9	114	0	-14	46	-50	-3	60	-50
CA03225_01	CA03225_01	87	118	0	104	-52	-50	17	41	-50	10	63	-50	0	171	0	461	146	0	81	181	0	104	136	0	79	217	0	30	82	-50	26	131	0	1	71	-50	46	110	0
CA00561_01	CA00561_01	1093	1117	0	1246	325	0	309	309	0	244	398	0	0	684	0	703	791	0	717	285	0	930	1401	0	738	1414	0	495	1223	0	56	980	0	504	603	0	561	1187	0
CA03228_01	CA03228_01	-11	42	-50	-24	136	-50	-20	94	0	-16	130	0	0	215	0	44	49	-50	-7	101	-50	-12	87	-50	-9	76	-50	-12	62	-50	-5	125	-50	-45	81	-50	-30	84	-50
CA03230_01	CA03230_01	2867	4452	0	5514	3845	0	941	573	0	606	932	0	0	2487	0	2858	4067	0	2499	2349	0	3440	2892	0	3405	5062	0	1662	2510	0	471	2620	0	965	1301	0	1835	2842	0
CA03232_01	CA03232_01	1328	3030	0	1562	1260	0	334	452	0	337	706	0	0	872	0	908	1950	0	934	353	0	1044	1279	0	1128	1495	0	806	730	0	61	709	0	300	317	0	537	822	0
CA03246_01	CA03246_01	2	85	0	18	246	-50	0	132	0	-11	164	0	0	243	0	7	39	-50	1	111	0	1947	2512	0	-1	116	0	-11	99	-50	0	177	0	-39	103	-50	-18	96	-50
CA03248_01	CA03248_01	-2	10	-50	13	76	-50	-11	34	-50	-21	35	-50	0	103	0	45	-30	-50	-4	29	-50	1	32	-50	-1	17	-50	-14	-9	-50	-3	23	-50	-54	-3	-50	-30	-24	-50
CA03250_01	CA03250_01	2333	2823	0	2451	3274	0	661	457	0	501	680	0	0	1222	0	1910	2257	0	2068	3182	0	2165	1654	0	2333	2743	0	973	2455	0	1107	2122	0	851	1227	0	1438	2261	0
CA03252_01	CA03252_01	-6	17	-50	18	139	-50	-10	27	-50	-12	44	-50	0	106	0	70	-67	-50	0	52	-50	23	92	0	-14	22	-50	-12	-3	-50	-5	24	-50	-48	7	-50	63	124	0
CA03254_01	CA03254_01	-1	55	0	42	310	0	-7	62	-50	-11	83	-50	0	177	0	59	10	-50	6	83	0	8	121	-50	-12	84	-50	-12	54	-50	-8	117	-50	-34	95	-50	-32	73	-50
CA03256_01	CA03256_01	580	392	0	1106	1460	0	180	124	0	138	234	0	0	447	0	479	362	0	534	720	0	500	359	0	509	725	0	106	541	0	117	490	0	96	233	0	178	458	0
CA03270_01	CA03270_01	11	19	-50	49	218	0	-11	27	-50	-16	39	-50	0	105	0	41	-25	-50	7	62	-50	13	32	-50	-4	18	-50	-8	-10	-50	-4	-14	-50	-38	19	-50	-18	-6	-50
CA03272_01	CA03272_01	3949	8113	0	5399	7101	0	1143	924	0	854	1474	0	0	2325	0	2677	6957	0	2740	2788	0	3251	2751	0	3038	4277	0	2275	1980	0	611	2304	0	978	1036	0	1007	1822	0
CA03274_01	CA03274_01	588	151	0	1084	667	0	130	158	0	122	186	0	0	343	0	704	258	0	573	407	0	675	889	0	535	674	0	57	604	0	37	561	0	203	272	0	184	505	0
CA03276_01	CA03276_01	1374	612	0	1723	2082	0	217	230	0	233	260	0	0	564	0	2806	1252	0	1418	1229	0	796	976	0	686	837	0	216	786	0	275	732	0	316	355	0	243	594	0
CA03278_01	CA03278_01	1186	1482	0	1726	3047	0	261	224	0	257	350	0	0	559	0	948	1801	0	822	1772	0	864	1038	0	674	955	0	538	701	0	339	659	0	252	311	0	254	479	0
CA03280_01	CA03280_01	503	720	0	750	1220	0	87	148	0	37	151	0	0	286	0	795	812	0	541	396	0	344	553	0	270	431	0	178	215	0	75	298	0	180	143	0	111	264	0
CA03565_01	CA03565_01	3219	4832	0	3864	2818	0	967	816	0	994	1168	0	0	2805	0	2029	4315	0	2123	2318	0	2786	3474	0	2484	4139	0	2134	2838	0	457	2400	0	1206	1252	0	1728	2771	0
CA03567_01	CA03567_01	-4	30	-50	-48	-142	-50	-15	47	-50	-8	55	-50	0	83	-50	336	139	0	-2	44	-50	-3	41	-50	5	53	-50	0	22	-50	3	29	-50	-18	31	-50	0	45	-50
CA03569_01	CA03569_01	-5	18	-50	-45	-138	-50	-15	24	-50	-6	38	-50	0	57	0	28	35	-50	-18	22	-50	-13	11	-50	-7	29	-50	-10	3	-50	-6	16	-50	-42	1	-50	-18	16	-50
CA03570_01	CA03570_01	-7	22	-50	-57	-173	-50	-11	35	-50	-1	56	-50	0	76	-50	30	50	-50	-11	32	-50	-12	30	-50	-2	45	-50	-1	0	-50	7	40	-50	-30	20	-50	-15	32	-50
CA03572_01	CA03572_01	265	473	0	261	626	0	40	84	0	36	137	0	0	283	0	1478	685	0	213	436	0	306	367	0	257	406	0	119	135	0	74	188	0	33	87	-50	113	231	0
CA03574_01	CA03574_01	1422	1533	0	1603	1652	0	365	324	0	375	610	0	0	986	0	1098	1013	0	1042	855	0	1272	1103	0	1232	1584	0	497	1024	0	157	909	0	286	498	0	677	1008	0
CA03587_01	CA03587_01	205	381	0	152	-133	-50	57	79	0	37	105	0	0	224	0	197	437	0	148	195	0	196	291	0	151	345	0	201	215	0	34	207	0	70	116	0	122	220	0
CA03589_01	CA03589_01	84	98	0	72	-76	-50	13	38	-50	13	55	-50	0	150	0	91	102	0	125	297	0	75	89	0	56	153	0	26	106	-50	25	126	0	-4	70	-50	27	87	-50
CA03591_01	CA03591_01	78	55	0	93	64	-50	10	48	-50	11	50	-50	0	143	0	93	106	0	71	291	0	100	219	0	76	162	0	11	96	-50	37	80	0	25	71	-50	32	126	0
CA03593_01	CA03593_01	84	157	0	151	122	-50	11	42	-50	5	76	-50	0	173	0	812	220	0	81	89	0	107	101	0	124	198	0	46	58	-50	14	110	0	4	59	-50	40	112	0
CA03595_01	CA03595_01	-11	6	-50	-42	-52	-50	-17	22	-50	-20	45	-50	0	81	-50	137	55	0	-6	31	-50	-1	30	-50	-16	37	-50	-4	11	-50	4	53	-50	-48	1	-50	-33	1	-50
CA03597_01	CA03597_01	242	286	0	261	152	0	64	88	0	61	136	0	0	269	0	263	256	0	206	247	0	231	272	0	221	396	0	78	268	0	38	252	0	58	126	0	111	247	0
CA03611_01	CA03611_01	4	21	0	9	21	-50	-9	23	-50	-11	39	-50	0	108	0	859	234	0	12	42	-50	19	43	-50	17	60	-50	5	2	-50	1	24	-50	-27	-3	-50	-29	-33	-50
CA03613_01	CA03613_01	478	487	0	725	595	0	153	146	0	135	217	0	0	398	0	462	431	0	413	422	0	421	560	0	473	754	0	163	515	0	53	398	0	167	228	0	207	405	0
CA03615_01	CA03615_01	777	1182	0	1187	1707	0	230	276	0	168	304	0	0	612	0	649	1363	0	596	804	0	635	972	0	627	1177	0	362	678	0	163	618	0	319	344	0	293	822	0
CA03617_01	CA03617_01	66	144	0	124	473	0	15	94	0	11	143	0	0	235	0	58	74	-50	66	271	0	67	196	0	58	200	0	34	203	0	21	257	0	-10	165	-50	26	194	0
CA03619_01	CA03619_01	245	455	0	530	329	0	80	81	0	64	160	0	0	273	0	704	493	0	253	151	0	268	259	0	234	418	0	171	313	0	17	255	0	16141	11725	-100	119	260	0
CA03621_01	CA03621_01	175	243	0	316	391	0	46	68	0	49	110	0	0	200	0	286	214	0	157	177	0	196	193	0	126	224	0	89	141	0	14	139	0	10	76	-50	53	145	0
CA03635_01	CA03635_01	16	26	0	60	158	-50	-9	34	-50	-17	40	-50	0	103	0	29	-42	-50	25	72	0	27	63	-50	2	32	-50	0	11	-50	2	26	-50	-33	18	-50	-8	31	-50
CA03637_01	CA03637_01	12	30	-50	106	484	0	6	101	0	-13	70	-50	0	115	0	425	57	0	53	58	-50	142	176	0	50	257	0	92	232	0	15	153	-50	16	56	-50	37	210	0
CA03639_01	CA03639_01	1774	1614	0	1781	1287	0	496	333	0	473	606	0	0	861	0	1207	1330	0	1464	568	0	1564	1287	0	1156	1511	0	683	1485	0	52	988	0	373	600	0	366	1099	0
CA03641_01	CA03641_01	543	639	0	761	336	0	125	119	0	98	223	0	0	333	0	365	603	0	322	202	0	354	573	0	235	517	0	204	512	0	28	367	0	156	223	0	84	295	0
CA03643_01	CA03643_01	3205	3225	0	4427	2550	0	781	488	0	894	980	0	0	1455	0	2452	3282	0	1865	1245	0	2146	2210	0	1571	2762	0	1352	2963	0	278	1967	0	668	1051	0	729	1533	0
CA03645_01	CA03645_01	1659	1838	0	2716	1409	0	256	276	0	105	311	0	0	727	0	1859	2436	0	630	210	0	689	720	0	628	805	0	373	434	0	80	784	0	215	249	0	226	501	0
CA03930_01	CA03930_01	-8	14	-50	-41	-161	-50	-5	32	-50	-4	69	-50	28	83	-50	253	64	0	-11	27	-50	-7	18	-50	-8	38	-50	-15	25	-50	-6	26	-50	-42	1	-50	-14	21	-50
CA03932_01	CA03932_01	3353	4759	0	3662	1808	0	1044	636	0	878	1108	0	1798	2593	0	2095	3828	0	2162	1474	0	2713	2674	0	2151	4955	0	1997	2994	0	287	2229	0	1167	1420	0	1903	3383	0
CA03933_01	CA03933_01	-3	37	-50	-41	-27	-50	-16	118	0	-7	138	0	28	143	-50	5	57	-50	-13	68	-50	-6	61	-50	-8	84	-50	-12	79	-50	-9	100	-50	-48	72	-50	-18	80	-50
CA03935_01	CA03935_01	7527	3870	0	8294	5327	0	1882	707	0	1622	2171	0	4008	5104	0	4920	2764	0	5818	4652	0	6835	4089	0	6196	9227	0	1444	5748	0	879	5472	0	1255	2729	0	3494	5590	0
CA03937_01	CA03937_01	1145	1521	0	1249	392	0	275	222	0	251	441	0	702	885	0	757	1156	0	951	893	0	1061	1042	0	1057	1859	0	412	854	0	140	773	0	244	393	0	454	849	0
CA03939_01	CA03939_01	219	323	0	199	298	0	56	138	0	54	206	0	167	369	0	224	258	0	182	257	0	223	214	0	201	384	0	94	284	0	33	301	0	45	177	0	126	315	0
CA03952_01	CA03952_01	-6	19	-50	-57	-207	-50	-14	26	-50	-8	42	-50	32	88	-50	56	43	-50	-6	20	-50	-8	17	-50	-2	29	-50	-11	-17	-50	-6	21	-50	-31	23	-50	-16	26	-50
CA03954_01	CA03954_01	2089	2283	0	2836	2009	0	805	402	0	698	932	0	1274	1709	0	1704	1768	0	1822	1445	0	2373	1615	0	2283	3312	0	909	2285	0	314	2000	0	599	1237	0	1147	2187	0
CA03956_01	CA03956_01	1413	1623	0	1868	4073	0	434	420	0	346	713	0	952	969	0	1445	1521	0	1297	1651	0	1619	1487	0	1468	1648	0	458	1043	0	261	898	0	304	445	0	684	1152	0
CA03958_01	CA03958_01	-14	51	0	64	234	-50	-9	118	0	-3	176	0	41	199	-50	96	111	0	-12	75	-50	1	83	-50	-10	83	-50	-9	92	-50	-5	118	-50	-39	84	-50	-17	107	-50
CA03960_01	CA03960_01	859	578	0	1384	1758	0	307	257	0	257	373	0	588	761	0	1213	683	0	853	754	0	956	975	0	946	1252	0	201	929	0	151	881	0	328	485	0	480	865	0
CA03962_01	CA03962_01	436	529	0	577	566	0	140	108	0	146	215	0	280	408	0	521	497	0	381	436	0	430	440	0	411	726	0	192	560	0	71	436	0	112	267	0	250	460	0
CA03975_01	CA03975_01	17	23	0	24	102	-50	-4	38	-50	-8	47	-50	39	101	-50	35	25	-50	15	77	-50	41	127	0	15	56	-50	-10	13	-50	2	57	-50	-40	11	-50	-18	-10	-50
CA03977_01	CA03977_01	644	763	0	919	765	0	246	176	0	220	320	0	494	562	0	627	691	0	604	620	0	692	679	0	684	968	0	301	733	0	67	490	0	191	344	0	340	590	0
CA03979_01	CA03979_01	10	48	0	33	197	-50	-6	38	-50	-11	51	-50	27	95	-50	36	6	-50	4	54	-50	18	71	-50	8	60	-50	-2	12	-50	2	29	-50	-33	12	-50	-21	12	-50
CA03981_01	CA03981_01	759	1200	0	1128	1082	0	224	185	0	216	310	0	423	604	0	593	1218	0	615	1168	0	657	703	0	605	1121	0	372	649	0	220	578	0	256	339	0	282	597	0
CA03983_01	CA03983_01	507	961	0	898	938	0	168	194	0	145	286	0	327	430	0	473	764	0	394	366	0	452	547	0	378	652	0	346	482	0	64	383	0	150	182	-50	187	441	0
CA03985_01	CA03985_01	531	691	0	852	1226	0	163	140	0	118	245	0	295	394	0	430	490	0	429	337	0	484	356	0	358	538	0	243	519	0	56	336	0	83	196	0	184	429	0
CA03999_01	CA03999_01	556	622	0	919	558	0	182	123	0	157	262	0	326	412	0	600	534	0	468	287	0	565	440	0	445	667	0	258	635	0	60	529	0	114	289	0	187	496	0
CA04001_01	CA04001_01	536	1054	0	1086	663	0	180	171	0	94	167	0	314	414	0	490	854	0	429	388	0	456	806	0	341	718	0	337	610	0	84	490	0	259	254	0	143	464	0
CA04003_01	CA04003_01	198	358	0	448	333	0	61	67	0	25	122	0	97	188	-50	586	328	0	194	102	0	175	178	0	130	224	0	89	111	0	8	251	0	16	79	-50	43	137	0
CA04005_01	CA04005_01	25	53	0	76	175	-50	10	41	-50	-7	48	-50	41	113	-50	85	94	0	52	131	0	101	101	0	37	130	0	52	132	0	18	111	-50	-19	21	-50	9	60	-50
CA00590_01	CA00590_01	242	154	0	436	388	0	43	58	0	18	90	0	115	191	-50	342	251	0	217	213	0	174	230	0	134	255	0	51	231	0	33	193	0	31	95	-50	41	134	0
CA04008_01	CA04008_01	6987	5056	0	10082	5339	0	1700	1081	0	1162	1492	0	2585	3121	0	6321	5945	0	3890	3708	0	4684	4580	0	3871	5224	0	1759	4918	0	978	4796	0	1596	2235	0	1653	3468	0
CA04298_01	CA04298_01	2377	1531	0	2864	1546	0	645	335	0	384	709	0	1565	1943	0	2130	1179	0	2111	1461	0	2285	1587	0	2153	2516	0	519	2186	0	257	1886	0	429	907	0	1122	1974	0
CA04300_01	CA04300_01	458	431	0	361	356	0	114	104	0	103	181	0	319	454	0	385	436	0	329	490	0	416	384	0	328	623	0	213	483	0	85	402	0	79	200	0	274	530	0
CA04302_01	CA04302_01	1010	1614	0	1196	684	0	343	360	0	330	428	0	724	963	0	455	825	0	749	553	0	939	1422	0	689	1211	0	508	789	0	106	798	0	474	470	0	575	1105	0
CA04304_01	CA04304_01	469	1232	0	459	-49	-50	137	135	0	120	204	0	264	426	0	322	909	0	401	217	0	432	610	0	416	757	0	380	540	0	31	438	0	234	240	0	249	472	0
CA04306_01	CA04306_01	-19	13	-50	-58	-244	-50	-12	31	-50	-9	52	-50	-14	82	-50	22	42	-50	-17	17	-50	-8	30	-50	-8	21	-50	-8	-15	-50	-11	-12	-50	-32	12	-50	-23	22	-50
CA04308_01	CA04308_01	265	624	0	336	1069	0	83	98	0	79	162	0	185	317	0	286	661	0	275	958	0	308	353	0	318	485	0	278	274	0	192	225	0	94	156	0	162	290	0
CA04320_01	CA04320_01	-15	14	-50	-58	-173	-50	-11	33	-50	-11	51	-50	-5	81	-50	26	39	-50	-10	22	-50	-3	21	-50	-5	29	-50	-15	-9	-50	-8	7	-50	-38	15	-50	-12	24	-50
CA04322_01	CA04322_01	285	537	0	433	262	0	119	101	0	96	202	0	192	291	0	311	379	0	285	273	0	351	280	0	332	472	0	229	368	0	54	306	0	100	243	0	174	328	0
CA04324_01	CA04324_01	4021	6150	0	5689	3851	0	1584	933	0	1324	1896	0	2780	3045	0	3811	4934	0	3716	1982	0	4533	3473	0	4471	5746	0	2796	4223	0	477	3665	0	1466	1996	0	2689	4018	0
CA04326_01	CA04326_01	145	344	0	364	109	0	61	90	0	11	97	-50	119	308	0	220	497	0	145	161	0	199	333	0	210	535	0	129	315	0	24	284	0	114	185	0	131	367	0
CA04328_01	CA04328_01	465	801	0	726	308	0	167	144	0	150	195	0	252	447	0	515	835	0	453	374	0	495	558	0	509	823	0	394	841	0	64	585	0	288	323	0	253	534	0
CA04330_01	CA04330_01	159	286	0	143	185	0	48	70	0	48	122	0	90	207	0	151	229	0	138	86	0	153	137	0	131	205	0	71	239	0	9	151	-50	10	98	-50	62	125	-50
CA04344_01	CA04344_01	587	654	0	1045	1283	0	255	238	0	157	192	0	339	501	0	1564	1215	0	671	1241	0	688	836	0	985	1597	0	419	1397	0	444	708	0	488	519	0	490	1060	0
CA04346_01	CA04346_01	-10	15	-50	0	116	-50	-17	37	-50	-11	43	-50	-13	70	-50	50	11	-50	-1	55	-50	3	37	-50	-3	46	-50	-13	0	-50	-2	29	-50	-45	7	-50	-32	-18	-50
CA04348_01	CA04348_01	574	1107	0	814	924	0	187	247	0	176	312	0	376	479	0	624	1038	0	525	478	0	509	766	0	576	969	0	303	543	0	85	491	0	279	292	0	233	511	0
CA04350_01	CA04350_01	-8	3	-50	18	125	-50	-14	19	-50	-18	37	-50	-9	82	-50	119	-10	-50	-9	25	-50	4	42	-50	-15	16	-50	-10	-18	-50	-2	22	-50	-39	0	-50	-27	-8	-50
CA04352_01	CA04352_01	160	373	0	314	324	0	51	63	0	38	151	0	104	217	0	283	219	0	153	100	0	176	155	0	135	230	0	141	200	0	17	187	0	21	91	-50	80	204	0
CA04354_01	CA04354_01	-1	20	-50	43	173	0	-14	20	-50	-12	43	-50	5	80	-50	10	-48	-50	9	58	0	17	35	-50	3	18	-50	-10	7	-50	-3	26	-50	-44	1	-50	-17	5	-50
CA04367_01	CA04367_01	252	252	0	552	374	0	72	119	0	54	139	0	123	256	0	346	221	0	168	187	0	197	360	0	142	351	0	68	299	0	19	229	0	117	131	0	57	226	0
CA04369_01	CA04369_01	1243	2498	0	1737	2306	0	373	335	0	346	592	0	664	776	0	881	1635	0	926	470	0	934	685	0	789	1015	0	817	858	0	115	762	0	291	454	0	295	612	0
CA04371_01	CA04371_01	1224	1524	0	2458	1828	0	476	429	0	346	555	0	665	1144	0	1288	1699	0	953	864	0	1254	1333	0	747	1457	0	601	1383	0	126	1226	0	509	649	0	307	929	0
CA04373_01	CA04373_01	-4	11	-50	10	93	-50	-18	23	-50	-23	57	-50	-3	89	-50	-2	21	-50	2	41	-50	13	43	-50	-10	24	-50	-12	-3	-50	-9	14	-50	-38	0	-50	-24	3	-50
CA04375_01	CA04375_01	212	367	0	389	395	0	39	96	0	13	120	0	99	260	0	210	422	0	130	159	0	169	274	0	123	258	0	117	255	0	15	214	0	35	106	-50	50	149	0
CA04377_01	CA04377_01	5277	5544	0	7571	10459	0	1386	1150	0	585	1018	0	2426	2496	0	3928	5891	0	2431	2929	0	2995	3132	0	2567	4294	0	2009	3586	0	1001	2726	0	1374	1408	0	979	2213	0
CA04664_01	CA04664_01	274	382	0	359	691	0	103	112	0	77	174	0	275	417	0	185	338	0	234	594	0	284	370	0	221	486	0	164	294	0	138	270	0	93	167	0	146	295	0
CA04666_01	CA04666_01	5	14	-50	-11	-47	-50	0	38	-50	-2	71	-50	21	106	-50	236	117	0	10	31	-50	21	45	-50	29	86	-50	13	66	-50	12	87	-50	8	47	-50	39	100	-50
CA04668_01	CA04668_01	1053	1308	0	1204	2144	0	322	374	0	297	511	0	694	952	0	670	1009	0	801	1231	0	937	1171	0	852	1257	0	513	922	0	231	785	0	318	424	0	453	786	0
CA04670_01	CA04670_01	198	287	0	185	-76	-50	63	62	0	58	144	0	119	233	0	164	249	0	167	215	0	222	218	0	201	351	0	115	269	0	31	230	0	49	157	0	113	253	0
CA04672_01	CA04672_01	361	663	0	451	394	0	126	122	0	128	234	0	307	444	0	301	550	0	392	543	0	439	421	0	450	636	0	282	451	0	77	360	0	123	198	0	251	423	0
CA04674_01	CA04674_01	44	86	0	83	52	-50	17	51	-50	16	52	-50	56	173	0	422	170	0	51	65	-50	72	113	0	56	152	0	25	68	-50	10	82	0	-4	60	-50	20	80	-50
CA04687_01	CA04687_01	-7	30	-50	-18	-64	-50	-14	47	-50	-7	49	-50	-5	100	-50	86	69	0	-4	21	-50	5	52	0	-4	26	-50	-8	24	-50	-8	23	-50	-12	9	-50	-19	25	-50
CA04689_01	CA04689_01	426	416	0	689	976	0	168	152	0	116	234	0	304	480	0	454	446	0	388	824	0	575	559	0	464	686	0	162	424	0	161	399	0	165	279	0	219	472	0
CA04691_01	CA04691_01	42	26	-50	79	117	-50	14	27	-50	1	81	-50	56	137	0	390	135	0	49	125	0	77	40	-50	70	148	0	-2	36	-50	16	56	-50	27	72	-50	23	55	-50
CA04693_01	CA04693_01	2517	3902	0	6067	4956	0	1055	911	0	433	1049	0	2328	2754	0	3629	4565	0	2741	2227	0	2962	3054	0	3738	5489	0	1253	2205	0	462	2600	0	1210	1644	0	1891	3120	0
CA04695_01	CA04695_01	371	662	0	703	661	0	135	146	0	82	200	0	231	397	0	512	615	0	322	249	0	378	378	0	380	614	0	222	369	0	53	351	0	140	205	0	210	353	0
CA04697_01	CA04697_01	402	660	0	1023	1568	0	106	182	0	29	171	0	279	400	0	1857	787	0	242	308	0	337	517	0	410	610	0	149	406	0	67	314	0	105	134	0	144	266	0
CA04711_01	CA04711_01	2361	2577	0	4188	1452	0	1114	521	0	691	896	0	1740	1932	0	3286	2650	0	2169	1197	0	2390	1847	0	2549	4044	0	1089	2671	0	255	2109	0	965	1368	0	1506	2387	0
CA04713_01	CA04713_01	108	217	0	230	1133	0	45	49	0	15	93	0	86	191	0	543	270	0	142	439	0	173	180	0	204	304	0	52	240	0	47	144	0	-12	95	-50	63	125	0
CA00611_01	CA00611_01	130	225	0	281	310	0	47	66	0	24	82	0	149	327	0	509	334	0	132	137	0	172	183	0	177	271	0	104	162	0	26	159	0	35	83	-50	78	151	0
CA04716_01	CA04716_01	667	868	0	1017	1044	0	226	219	0	201	324	0	367	544	0	824	1042	0	605	832	0	596	782	0	559	1001	0	261	725	0	150	577	0	284	367	0	303	661	0
CA04718_01	CA04718_01	108	194	0	210	310	0	28	37	0	4	76	0	61	156	0	228	174	0	78	149	0	102	129	0	84	170	0	43	114	0	12	105	0	-5	69	-50	44	92	0
CA04720_01	CA04720_01	-6	8	-50	17	109	-50	-16	22	-50	-20	27	-50	-6	81	-50	-6	-46	-50	-5	33	-50	0	24	-50	-16	11	-50	-13	-17	-50	-8	0	-50	-50	-3	-50	-26	1	-50
CA04734_01	CA04734_01	-8	12	-50	19	72	-50	-17	28	-50	-15	39	-50	-8	70	-50	4	-39	-50	0	54	-50	3	42	-50	-9	11	-50	-9	37	-50	-6	2	-50	-44	-3	-50	-19	14	-50
CA04736_01	CA04736_01	2141	2541	0	3772	2037	0	714	504	0	509	764	0	1119	1276	0	1834	2462	0	1511	1145	0	1670	1659	0	1294	2237	0	1019	2065	0	270	1640	0	730	956	0	482	1296	0
CA04738_01	CA04738_01	15	41	0	58	85	-50	-10	28	-50	-20	31	-50	20	123	0	52	49	-50	9	53	-50	16	67	-50	3	35	-50	6	9	-50	-1	68	-50	-23	4	-50	-15	9	-50
CA04739_01	CA04739_01	-1	16	-50	29	75	-50	-14	29	-50	-16	44	-50	-2	85	-50	29	46	-50	8	39	-50	22	48	0	-2	27	-50	-14	-14	-50	-8	6	-50	-38	-5	-50	-25	1	-50
CA04741_01	CA04741_01	618	823	0	1160	897	0	184	191	0	74	202	0	285	466	0	714	783	0	466	266	0	504	603	0	400	629	0	271	701	0	70	509	0	249	324	0	139	415	0
CA04743_01	CA04743_01	413	412	0	537	439	0	124	136	0	51	129	0	159	340	0	439	505	0	306	328	0	374	580	0	266	496	0	159	594	0	103	452	0	272	268	0	117	364	0
CA05033_01	CA05033_01	1653	1996	0	1613	1449	0	562	514	0	454	708	0	1081	1358	0	836	1227	0	1227	971	0	1459	1798	0	1303	2204	0	760	1592	0	213	1457	0	695	836	0	830	1510	0
CA05035_01	CA05035_01	1204	324	0	1310	1572	0	359	137	0	290	396	0	928	1107	0	947	334	0	896	986	0	1176	757	0	943	1585	0	133	1113	0	198	1040	0	231	556	0	644	1176	0
CA05037_01	CA05037_01	403	369	0	374	476	0	123	91	0	122	182	0	322	444	0	327	350	0	287	439	0	385	391	0	330	526	0	123	367	0	82	350	0	92	200	0	235	398	0
CA05039_01	CA05039_01	-11	-8	-50	-65	-133	-50	-18	5	-50	-12	39	-50	-21	37	-50	10	25	-50	-20	10	-50	-14	-2	-50	-15	19	-50	-14	-30	-50	-9	-10	-50	-42	-17	-50	-22	-16	-50
CA05041_01	CA05041_01	-20	2	-50	-49	-129	-50	-18	0	-50	-11	27	-50	-19	39	-50	44	37	0	-15	18	-50	-9	2	-50	-14	11	-50	-13	-45	-50	-8	-14	-50	-42	-12	-50	-20	3	-50
CA05043_01	CA05043_01	-19	-3	-50	-38	-61	-50	-15	5	-50	-9	18	-50	-15	41	-50	-6	21	-50	-15	0	-50	-16	1	-50	-16	-5	-50	-15	-24	-50	-10	-13	-50	-38	-15	-50	-24	-14	-50
CA05057_01	CA05057_01	780	2483	0	1048	926	0	366	247	0	285	473	0	670	843	0	735	1434	0	754	357	0	892	583	0	889	1336	0	809	882	0	89	784	0	350	469	0	589	885	0
CA05059_01	CA05059_01	349	125	0	518	44	0	149	63	0	110	292	0	391	368	0	483	87	0	379	54	0	544	182	0	458	771	0	17	399	0	4	324	0	47	212	0	401	400	0
CA05061_01	CA05061_01	2216	5107	0	3887	2675	0	1060	692	0	784	1037	0	2085	2223	0	2648	7185	0	1878	1324	0	2527	3443	0	2828	5326	0	2572	2892	0	281	2521	0	1452	1596	0	1895	2697	0
CA05063_01	CA05063_01	279	283	0	458	414	0	126	82	0	112	141	0	213	322	0	393	497	0	315	869	0	338	418	0	386	647	0	133	473	0	151	352	0	129	207	0	153	352	0
CA05065_01	CA05065_01	196	414	0	297	115	0	82	97	0	69	140	0	130	213	0	275	372	0	189	116	0	207	263	0	163	337	0	156	275	0	27	262	0	84	176	0	107	219	0
CA05067_01	CA05067_01	1089	689	0	1686	584	0	434	256	0	364	481	0	726	931	0	1220	881	0	972	651	0	1118	1248	0	1016	2029	0	268	1772	0	115	1239	0	533	814	0	675	1245	0
CA05081_01	CA05081_01	480	670	0	766	912	0	204	132	0	145	248	0	365	452	0	640	602	0	392	430	0	473	370	0	503	689	0	203	464	0	67	372	0	102	250	0	234	358	0
CA05083_01	CA05083_01	262	464	0	462	519	0	116	108	0	54	137	0	174	293	0	515	480	0	211	181	0	252	271	0	243	419	0	169	223	0	23	194	0	78	110	0	118	195	0
CA05085_01	CA05085_01	279	497	0	483	1206	0	124	69	0	84	144	0	191	297	0	618	694	0	261	562	0	330	279	0	277	527	0	269	426	0	112	275	0	103	235	0	174	316	0
CA05087_01	CA05087_01	214	251	0	429	356	0	67	67	0	53	100	0	133	244	0	275	235	0	153	234	0	180	233	0	148	327	0	72	236	0	35	182	0	72	169	0	69	173	0
CA05089_01	CA05089_01	247	314	0	472	492	0	86	67	0	72	159	0	130	247	0	415	320	0	199	164	0	234	241	0	193	296	0	102	294	0	32	239	0	61	115	0	83	243	0
CA05091_01	CA05091_01	40	68	-50	141	213	0	4	26	-50	-3	46	-50	34	110	0	817	200	0	54	66	0	66	77	0	33	75	0	24	75	-50	2	37	-50	-20	10	-50	0	27	-50
CA05105_01	CA05105_01	989	992	0	1877	1297	0	397	268	0	363	492	0	598	764	0	1029	1057	0	826	888	0	999	897	0	665	1199	0	435	1234	0	174	847	0	261	431	0	319	783	0
CA05107_01	CA05107_01	242	407	0	583	362	0	98	65	0	68	111	0	116	244	0	258	364	0	186	298	0	237	279	0	126	381	0	140	307	0	57	270	0	63	170	0	35	197	0
CA05109_01	CA05109_01	444	908	0	874	629	0	149	226	0	149	223	0	260	370	0	623	1016	0	429	543	0	496	1142	0	256	572	0	332	678	0	46	428	0	302	287	0	135	488	0
CA05111_01	CA05111_01	299	454	0	532	476	0	104	71	0	81	125	0	168	277	0	355	468	0	231	291	0	261	274	0	190	337	0	128	288	0	58	234	0	62	123	0	66	169	0
CA05113_01	CA05113_01	435	695	0	760	713	0	160	131	0	69	146	0	190	339	0	454	665	0	325	491	0	368	470	0	237	590	0	252	554	0	100	369	0	134	206	0	105	277	0
CA05115_01	CA05115_01	4	17	-50	33	86	0	-4	24	-50	-5	34	-50	4	75	-50	634	299	0	157	88	0	15	47	-50	1	29	-50	3	43	-50	2	22	-50	-18	-1	-50	9	48	-50
CA05404_01	CA05404_01	21	34	0	22	13	-50	3	26	-50	5	41	-50	22	82	-50	114	93	0	21	84	-50	27	55	-50	35	82	-50	16	100	-50	19	55	-50	-3	30	-50	25	81	-50
CA05406_01	CA05406_01	2939	3194	0	2997	1743	0	777	552	0	626	844	0	1784	2126	0	1681	1982	0	1910	2482	0	2244	2772	0	1919	3462	0	882	2564	0	399	2396	0	834	1056	0	1198	2183	0
CA05408_01	CA05408_01	2587	2480	0	2061	2271	0	754	505	0	656	846	0	1735	1946	0	1284	1400	0	1526	1563	0	1877	1944	0	1684	2406	0	787	2011	0	337	1761	0	715	904	0	1098	1757	0
CA05410_01	CA05410_01	1789	3626	0	1561	951	0	531	502	0	450	739	0	903	1120	0	1054	2328	0	1116	567	0	1372	1605	0	1242	2004	0	1270	1563	0	112	1151	0	628	672	0	830	1430	0
CA05412_01	CA05412_01	132	111	0	91	15	-50	22	38	-50	25	78	0	73	132	0	121	112	0	81	84	0	107	128	0	88	209	0	29	140	0	14	140	0	2	72	-50	56	170	0
CA05414_01	CA05414_01	302	478	0	391	246	0	132	120	0	105	155	0	239	340	0	276	356	0	245	156	0	328	342	0	312	521	0	178	392	0	27	322	0	129	196	0	181	346	0
CA05428_01	CA05428_01	1307	1611	0	1661	2070	0	527	362	0	490	617	0	953	1172	0	1227	1346	0	1220	815	0	1454	1139	0	1351	2026	0	630	1630	0	150	1268	0	570	835	0	804	1434	0
CA05430_01	CA05430_01	803	1685	0	1384	1487	0	330	278	0	173	383	0	800	921	0	1029	1524	0	788	502	0	1024	1028	0	976	1509	0	712	1071	0	139	918	0	420	575	0	528	904	0
CA05432_01	CA05432_01	669	987	0	1167	965	0	290	311	0	171	350	0	451	614	0	758	952	0	606	542	0	771	998	0	841	1190	0	329	778	0	107	601	0	376	458	0	347	696	0
CA05434_01	CA05434_01	249	312	0	460	704	0	118	106	0	74	173	0	235	319	0	557	359	0	237	314	0	271	266	0	366	493	0	117	332	0	61	254	0	84	152	0	152	258	0
CA05436_01	CA05436_01	386	624	0	717	634	0	172	108	0	138	253	0	300	406	0	478	511	0	341	263	0	408	326	0	421	710	0	226	527	0	51	405	0	130	270	0	248	446	0
CA05438_01	CA05438_01	905	1708	0	1634	2205	0	392	339	0	292	475	0	641	874	0	1124	1703	0	816	745	0	981	874	0	999	1510	0	692	1125	0	136	844	0	438	579	0	539	976	0
CA05452_01	CA05452_01	473	762	0	736	1525	0	192	174	0	112	242	0	325	431	0	668	668	0	371	621	0	442	393	0	492	666	0	245	446	0	124	341	0	142	219	0	196	363	0
CA05454_01	CA05454_01	-13	4	-50	0	56	-50	-15	14	-50	-15	17	-50	-10	44	-50	-5	5	-50	-11	9	-50	-9	4	-50	-12	5	-50	-10	-24	-50	-4	13	-50	-47	-27	-50	-29	-24	-50
CA05456_01	CA05456_01	961	336	0	1509	824	0	371	147	0	313	359	0	712	786	0	1383	419	0	1062	673	0	1136	656	0	1077	1396	0	148	1122	0	114	989	0	218	582	0	499	921	0
CA05458_01	CA05458_01	326	402	0	552	411	0	126	95	0	89	190	0	191	279	0	412	415	0	266	214	0	292	310	0	253	440	0	133	428	0	33	317	0	154	312	0	137	356	0
CA05460_01	CA05460_01	1300	475	0	1935	2873	0	584	369	0	527	889	0	980	976	0	1576	470	0	1269	1254	0	1487	1025	0	1120	1568	0	222	1520	0	221	1034	0	440	657	0	861	1219	0
CA05462_01	CA05462_01	551	902	0	1093	1214	0	286	171	0	237	393	0	388	488	0	578	651	0	543	275	0	569	395	0	433	579	0	364	647	0	64	472	0	152	327	0	287	538	0
CA05476_01	CA05476_01	1327	2356	0	2067	1337	0	610	374	0	546	742	0	839	970	0	1315	2027	0	1158	676	0	1263	1062	0	980	1595	0	930	1361	0	145	1151	0	476	698	0	523	1039	0
CA05478_01	CA05478_01	2950	5917	0	5082	7085	0	1375	1122	0	1266	1680	0	2109	2129	0	2848	5081	0	2746	3136	0	2856	3339	0	2540	3991	0	2146	3332	0	865	2570	0	1441	1615	0	829	1989	0
CA05480_01	CA05480_01	8138	10882	0	13570	7942	0	3218	2394	0	2609	3584	0	4585	4894	0	6718	9526	0	5968	4221	0	6274	7483	0	4980	8238	0	3716	7109	0	455	5173	0	3396	3661	0	2353	5237	0
CA00627_01	CA00627_01	253	254	0	550	278	0	91	51	0	66	120	0	128	233	0	319	268	0	195	176	0	229	241	0	124	305	0	104	376	0	39	251	0	79	188	0	58	199	0
CA05483_01	CA05483_01	16	0	-50	18	69	-50	-16	6	-50	-25	23	-50	-5	47	-50	19	32	-50	3	22	-50	0	28	-50	-10	13	-50	-16	-18	-50	-3	0	-50	-30	1	-50	-29	-8	-50
CA05485_01	CA05485_01	706	877	0	767	1660	0	204	184	0	123	261	0	440	517	0	555	1008	0	358	566	0	467	508	0	394	537	0	438	576	0	174	436	0	228	273	0	181	357	0
CA05768_01	CA05768_01	6970	7180	0	8171	4319	0	2727	1598	0	1966	2873	0	5084	6609	0	4963	6011	0	6521	3920	0	7666	5781	0	6607	10204	0	2896	7002	0	617	5581	0	2329	3762	0	4363	6973	0
CA05770_01	CA05770_01	590	817	0	589	501	0	271	205	0	199	285	0	418	553	0	445	549	0	473	335	0	593	525	0	552	752	0	429	724	0	90	652	0	346	445	0	475	871	0
CA05772_01	CA05772_01	940	752	0	962	757	0	380	214	0	307	472	0	792	838	0	676	547	0	642	445	0	870	613	0	816	1145	0	343	976	0	123	889	0	340	574	0	645	1095	0
CA05774_01	CA05774_01	5821	6475	0	4802	2645	0	1750	1083	0	1480	1774	0	3405	4208	0	3894	5334	0	3860	3492	0	4672	4769	0	4395	6923	0	2453	5020	0	717	4365	0	2123	2632	0	3030	4911	0
CA05776_01	CA05776_01	351	378	0	363	405	0	142	102	0	105	200	0	259	329	0	278	274	0	240	227	0	312	274	0	300	502	0	157	371	0	69	345	0	110	216	0	232	427	0
CA05778_01	CA05778_01	-12	30	-50	-61	35	-50	-8	44	-50	-9	61	-50	1	90	-50	335	115	0	7	44	-50	18	58	-50	17	109	-50	9	25	-50	2	29	-50	-8	33	-50	-6	32	-50
CA05791_01	CA05791_01	4334	6964	0	7783	5367	0	1728	1129	0	1572	1954	0	3949	4203	0	4468	6358	0	3839	3426	0	4546	5173	0	4561	7361	0	2726	4971	0	753	4288	0	2043	2519	0	2821	4085	0
CA05793_01	CA05793_01	44	144	0	47	-36	-50	32	46	0	26	66	-50	38	139	0	68	139	0	44	64	-50	63	93	0	46	125	0	63	197	0	18	98	-50	17	49	-50	46	106	0
CA05795_01	CA05795_01	171	232	0	172	253	0	72	104	0	30	76	0	118	203	0	200	332	0	153	409	0	185	354	0	200	276	0	144	231	0	90	216	0	169	128	0	98	229	0
CA05797_01	CA05797_01	237	251	0	423	90	0	107	64	0	63	129	0	175	295	0	291	296	0	211	171	0	252	207	0	289	533	0	90	293	0	35	252	0	83	176	0	153	293	0
CA05799_01	CA05799_01	5773	12240	0	11779	2279	0	2661	1299	0	2225	2031	0	4776	5881	0	6432	13495	0	4675	1990	0	6031	6342	0	5083	10250	0	5799	8055	0	601	7344	0	3698	4884	0	4716	6952	0
CA05801_01	CA05801_01	674	793	0	1206	814	0	367	187	0	269	354	0	457	662	0	850	870	0	647	581	0	765	603	0	680	1258	0	361	1194	0	112	848	0	333	680	0	501	936	0
CA05814_01	CA05814_01	989	1433	0	1545	645	0	523	406	0	335	464	0	690	1073	0	1465	1972	0	1133	1008	0	1362	1617	0	1031	1994	0	860	2420	0	210	1860	0	1002	1138	0	812	1631	0
CA05816_01	CA05816_01	587	918	0	1130	1424	0	279	246	0	161	290	0	384	636	0	690	1024	0	534	667	0	705	669	0	543	1099	0	363	862	0	112	642	0	316	469	0	350	681	0
CA05818_01	CA05818_01	1141	1863	0	2154	1363	0	490	421	0	369	490	0	753	1003	0	1379	1792	0	1044	667	0	1161	1342	0	1118	1758	0	742	1400	0	153	1158	0	694	742	0	563	1176	0
CA05820_01	CA05820_01	435	520	0	696	370	0	159	93	0	128	175	0	189	341	0	385	545	0	322	341	0	349	379	0	249	562	0	184	448	0	60	370	0	182	292	0	149	435	0
CA05822_01	CA05822_01	161	358	0	313	878	0	66	99	0	60	110	0	114	188	0	225	384	0	197	279	0	176	223	0	141	216	0	102	149	0	49	136	0	48	104	0	66	167	0
CA05824_01	CA05824_01	-7	17	-50	12	89	-50	-15	11	-50	-17	43	-50	-6	54	-50	19	29	-50	-5	33	-50	6	38	-50	-14	0	-50	-9	-14	-50	-4	-13	-50	-44	-29	-50	-17	0	-50
CA05838_01	CA05838_01	408	436	0	849	1275	0	183	119	0	141	183	0	286	343	0	441	425	0	346	825	0	360	492	0	282	473	0	144	439	0	164	344	0	139	223	0	130	345	0
CA05840_01	CA05840_01	915	1257	0	2035	1027	0	332	202	0	262	489	0	486	730	0	993	1228	0	598	525	0	757	780	0	497	981	0	1003	2466	0	128	873	0	299	515	0	190	617	0
CA05842_01	CA05842_01	1311	1288	0	1920	1878	0	440	320	0	273	351	0	558	719	0	971	1402	0	897	1171	0	956	1113	0	678	1257	0	429	1159	0	96	726	0	375	573	0	261	799	0
CA05844_01	CA05844_01	59	81	0	111	136	0	15	20	-50	-8	32	-50	31	72	0	52	84	0	38	90	0	51	77	0	27	68	-50	17	22	-50	8	26	-50	-13	21	-50	-8	21	-50
CA05846_01	CA05846_01	-6	1	-50	23	61	-50	-15	11	-50	-7	20	-50	-4	56	-50	17	15	-50	3	26	-50	1	12	-50	-5	12	-50	-14	-11	-50	-2	-7	-50	-23	-7	-50	-27	-14	-50
CA05848_01	CA05848_01	1107	1443	0	1161	1477	0	372	313	0	282	466	0	500	612	0	756	1152	0	623	569	0	750	701	0	587	911	0	558	922	0	149	690	0	368	458	0	305	621	0
CA06133_01	CA06133_01	-17	-2	-50	-28	-75	-50	-18	10	-50	-6	25	-50	-17	48	-50	250	55	0	-15	4	-50	-9	-1	-50	-8	3	-50	-9	-35	-50	19	52	-50	-22	-16	-50	-2	12	-50
CA06135_01	CA06135_01	13	19	0	-11	40	-50	-9	24	-50	3	47	-50	11	84	-50	32	56	0	-3	66	0	0	41	-50	11	48	-50	-7	26	-50	30	102	0	-3	14	-50	0	26	-50
CA06137_01	CA06137_01	0	4	-50	-42	4	-50	-16	17	-50	-5	39	-50	-4	60	-50	10	26	-50	-8	11	-50	0	61	-50	2	14	-50	-8	-12	-50	6	55	-50	26	-22	-50	-6	26	-50
CA06139_01	CA06139_01	3	20	-50	-57	-44	-50	3	10	-50	-3	33	-50	19	82	-50	656	163	0	30	47	-50	74	104	0	55	105	0	47	18	-50	16	80	-50	17	17	-50	25	46	-50
CA06141_01	CA06141_01	126	233	0	105	-52	-50	49	52	0	36	68	0	92	155	0	126	196	0	107	73	0	124	168	0	118	204	0	69	143	0	12	156	0	42	63	-50	91	176	0
CA06143_01	CA06143_01	30	8	0	25	-52	-50	4	35	-50	-4	36	-50	28	99	0	57	88	0	36	57	-50	62	105	0	50	112	0	16	59	-50	9	67	-50	14	38	-50	50	93	0
CA06156_01	CA06156_01	375	734	0	568	561	0	139	165	0	108	227	0	316	419	0	379	555	0	316	228	0	369	374	0	391	612	0	254	357	0	52	338	0	191	249	0	229	388	0
CA06157_01	CA06157_01	-17	0	-50	-30	-87	-50	-13	12	-50	-14	38	-50	-10	45	-50	-2	23	-50	-13	0	-50	-7	5	-50	-10	18	-50	-19	-35	-50	-5	14	-50	-41	-22	-50	-26	-7	-50
CA06159_01	CA06159_01	17	36	0	27	-3	-50	8	25	-50	-12	23	-50	12	84	0	35	78	0	20	37	-50	26	67	-50	31	93	0	5	5	-50	5	42	-50	0	18	-50	5	46	-50
CA06161_01	CA06161_01	249	501	0	439	169	0	100	91	0	60	126	0	182	320	0	291	532	0	197	247	0	236	297	0	259	578	0	150	277	0	47	270	0	118	174	0	131	277	0
CA06163_01	CA06163_01	1791	2995	0	5745	2068	0	948	769	0	282	442	0	1526	2019	0	3011	5190	0	1956	2233	0	2652	4631	0	2551	5315	0	1458	2867	0	604	2556	0	2321	1914	0	1633	2809	0
CA00655_01	CA00655_01	6107	8557	0	10529	7365	0	2946	1799	0	2252	3727	0	6209	5973	0	8161	10601	0	5452	3534	0	6999	5577	0	6436	11334	0	4083	6772	0	713	5924	0	2610	3787	0	4982	6516	0
CA06178_01	CA06178_01	2146	2341	0	4257	3806	0	1130	852	0	554	1001	0	2091	2420	0	3311	2528	0	2286	1285	0	2863	2187	0	3008	3752	0	1005	3092	0	293	2430	0	1208	1603	0	1484	2449	0
CA06180_01	CA06180_01	-23	-5	-50	-3	19	-50	-15	17	-50	-19	24	-50	-20	48	-50	17	5	-50	-16	4	-50	-16	4	-50	-15	8	-50	-17	-24	-50	-8	9	-50	-55	-16	-50	-32	-33	-50
CA06182_01	CA06182_01	8180	6850	0	13142	11073	0	3326	2288	0	2606	2655	0	3714	6888	0	9684	7162	0	6417	5630	0	7735	8624	0	7478	7591	0	2596	10853	0	1267	8044	0	3246	5346	0	3114	8788	0
CA06184_01	CA06184_01	1283	935	0	2997	1247	0	681	251	0	522	638	0	874	1278	0	1657	1184	0	1281	1277	0	1369	1085	0	1183	2209	0	470	2132	0	321	1785	0	604	1221	0	924	2044	0
CA06186_01	CA06186_01	-5	23	-50	50	120	-50	19	22	-50	-12	36	-50	57	76	0	18	13	-50	3	47	-50	22	39	-50	-4	16	-50	-2	-14	-50	-3	4	-50	-26	8	-50	-9	16	-50
CA06188_01	CA06188_01	-3	32	0	31	158	-50	-6	22	-50	-17	37	-50	3	59	-50	15	38	-50	1	34	-50	14	25	-50	-1	27	-50	-6	-14	-50	-9	-13	-50	-30	-3	-50	-6	20	-50
CA06202_01	CA06202_01	150	196	0	397	412	0	61	38	-50	37	131	0	92	223	0	216	244	0	125	298	0	188	204	0	122	244	0	96	219	0	69	140	0	40	119	0	38	151	0
CA06204_01	CA06204_01	387	943	0	758	559	0	168	66	0	214	535	0	271	424	0	326	813	0	241	270	0	279	271	0	224	492	0	433	356	0	51	265	0	91	172	0	93	234	0
CA06206_01	CA06206_01	-7	6	-50	22	62	-50	-12	6	-50	-14	44	-50	2	56	-50	128	105	0	15	34	-50	7	25	-50	1	27	-50	3	31	-50	-2	56	-50	-26	2	-50	-16	6	-50
CA06208_01	CA06208_01	1000	1302	0	1566	2131	0	355	294	0	317	1182	0	583	668	0	886	1263	0	668	794	0	857	858	0	663	982	0	424	1002	0	207	842	0	326	520	0	287	685	0
CA06210_01	CA06210_01	-4	0	-50	12	85	-50	-16	4	-50	-26	9	-50	-9	53	-50	0	19	-50	-3	27	-50	-1	14	-50	-11	-1	-50	-12	7	-50	-11	-15	-50	-44	-15	-50	-27	-12	-50
CA06212_01	CA06212_01	2179	2272	0	3405	9640	0	760	656	0	671	936	0	1793	1657	0	2511	3567	0	1583	2758	0	2054	2227	0	1613	2285	0	1553	2328	0	1054	1816	0	963	1100	0	756	1397	0
Empty	Empty	36	17	-50	99	126	-50	23	68	0	11	30	-50	86	176	0	15	35	-50	91	135	0	47	105	0	53	87	0	92	259	0	57	174	0	143	195	0	55	143	0
Empty	Empty	3	-2	0	249	544	0	22	26	-50	11	20	-50	35	47	-50	11	15	-50	30	166	0	36	105	0	35	98	0	94	364	0	52	198	0	57	77	-50	45	122	0
Empty	Empty	12	2	0	329	666	0	17	37	-50	10	37	-50	43	110	0	12	31	-50	195	189	0	53	100	0	64	126	0	81	271	0	66	185	0	119	161	0	40	136	0
Empty	Empty	11	4	0	614	1166	0	18	34	-50	16	30	-50	80	116	0	12	26	-50	223	193	0	45	77	0	46	105	0	83	253	0	54	117	0	159	183	0	30	78	-50
Empty	Empty	12	4	0	730	1376	0	21	43	-50	15	26	-50	25	44	-50	14	28	-50	119	136	0	60	103	0	55	124	0	77	288	0	72	189	0	130	127	0	65	113	0
Empty	Empty	-9	3	-50	-14	9	-50	-1	14	-50	3	3	-50	3	11	-50	3	10	-50	3	11	-50	3	8	-50	11	19	0	6	39	-50	4	29	-50	8	25	-50	7	25	-50
Empty	Empty	18	28	0	153	252	-50	29	54	0	11	30	-50	31	42	-50	10	34	-50	158	166	0	51	103	0	22	57	-50	84	236	0	66	243	0	92	129	0	109	241	0
Empty	Empty	-8	2	-50	1	9	-50	0	2	-50	5	9	-50	-1	20	-50	1	7	-50	4	11	-50	0	8	-50	2	14	-50	7	26	-50	4	14	-50	8	17	-50	6	39	-50
Empty	Empty	14	20	0	140	329	0	27	58	0	16	33	-50	59	141	0	12	28	-50	84	123	0	47	101	0	49	85	0	122	300	0	61	181	0	44	63	-50	63	156	0
Empty	Empty	8	21	-50	116	321	0	19	38	-50	16	39	-50	56	115	0	13	23	-50	112	161	0	57	89	0	29	59	-50	82	220	0	67	201	0	51	52	-50	32	80	-50
Empty	Empty	11	14	0	179	473	0	36	83	0	14	34	-50	25	40	-50	11	35	-50	123	156	0	47	70	0	18	44	-50	82	244	0	69	225	0	45	53	-50	31	56	-50
Empty	Empty	6	3	0	240	779	0	23	42	-50	13	42	-50	91	134	0	15	25	-50	100	152	0	58	92	0	56	113	0	84	247	0	52	181	0	30	31	-50	41	147	0
Empty	Empty	12	3	0	177	468	0	36	97	0	16	28	-50	36	40	-50	12	29	-50	127	186	0	61	80	0	36	78	0	111	289	0	70	243	0	38	50	-50	110	337	0
Empty	Empty	25	36	0	45	121	-50	44	76	0	19	36	-50	34	44	-50	13	25	-50	112	114	0	60	107	0	19	39	-50	99	277	0	59	202	0	41	52	-50	45	164	0
Empty	Empty	-5	-5	-50	-3	-2	-50	-1	7	-50	2	5	-50	8	21	-50	1	-7	-50	3	19	-50	1	12	-50	0	10	-50	8	37	-50	3	16	-50	1	32	-50	3	11	-50
Empty	Empty	-3	-11	-50	1	37	-50	6	38	-50	0	8	-50	5	28	-50	1	16	-50	5	17	-50	4	10	-50	1	16	-50	6	33	-50	3	22	-50	2	34	-50	5	16	-50
Empty	Empty	19	7	0	72	272	0	47	99	0	19	45	-50	73	147	0	17	35	-50	95	140	0	24	40	-50	32	87	0	87	235	0	34	157	0	99	138	0	55	119	0
Empty	Empty	18	9	0	122	416	0	70	107	0	16	46	-50	33	54	-50	10	24	-50	133	154	0	27	53	-50	14	31	-50	89	203	0	37	131	0	146	152	0	15	48	-50
Empty	Empty	44	33	0	127	256	0	43	88	0	33	51	0	26	46	-50	10	26	-50	162	231	0	22	43	-50	16	47	-50	110	283	0	39	115	0	130	164	0	23	70	-50
Empty	Empty	1	6	0	93	145	-50	58	93	0	27	38	-50	26	34	-50	14	30	-50	124	176	0	46	122	0	25	85	0	101	239	0	42	163	0	40	54	-50	266	203	0
Empty	Empty	11	7	0	199	459	0	78	114	0	9	48	0	26	53	-50	8	20	-50	70	117	0	59	108	0	27	72	0	73	180	0	33	106	0	94	120	0	41	164	0
Empty	Empty	14	7	0	117	248	0	76	117	0	19	34	-50	33	36	-50	10	21	-50	91	108	0	42	90	0	35	124	0	75	228	0	48	151	0	38	49	-50	16	40	-50
Empty	Empty	66	62	0	119	378	0	63	145	0	32	98	0	27	49	-50	13	28	-50	78	113	0	22	43	-50	17	48	-50	81	244	0	19	80	-50	36	52	-50	32	78	0
Empty	Empty	45	28	0	54	312	0	66	140	0	431	130	0	23	49	-50	10	29	-50	371	143	0	41	81	0	21	68	0	53	222	0	43	139	0	46	56	-50	125	322	0
cac01	Randomly generated negative control	-3	9	-50	-31	-104	-50	-1	24	-50	-4	42	-50	11	81	-50	58	49	0	5	18	-50	12	40	-50	11	53	0	10	49	-50	4	51	-50	20	50	-50	50	112	0
cac03	Randomly generated negative control	3	11	-50	-17	-13	-50	-11	25	-50	4	66	0	7	113	0	31	58	0	-5	38	-50	2	43	-50	-1	44	-50	2	307	-50	9	42	-50	0	34	-50	-7	32	-50
cac05	Randomly generated negative control	-16	-2	-50	-29	-67	-50	-9	6	-50	-4	30	-50	-13	53	-50	-1	22	-50	-15	4	-50	-7	-2	-50	-7	12	-50	-9	153	-50	-3	2	-50	3	19	-50	-14	-1	-50
cac07	Randomly generated negative control	-15	2	-50	-38	-142	-50	-12	10	-50	-6	31	-50	-6	54	-50	0	30	-50	-15	14	-50	-6	2	-50	-4	11	-50	-10	-11	-50	-6	16	-50	4	49	-50	-11	19	-50
cac09	Randomly generated negative control	-20	-9	-50	-29	-7	-50	-10	15	-50	-10	40	-50	-7	47	-50	-4	27	-50	-14	14	-50	-7	4	-50	-9	18	-50	-7	39	-50	-2	13	-50	55	79	-50	-12	-1	-50
cac11	Randomly generated negative control	9	11	0	431	894	0	45	95	0	14	31	-50	25	38	-50	12	27	-50	117	113	0	37	81	0	45	84	0	68	220	0	37	165	0	114	157	0	24	69	-50
cac01	Randomly generated negative control	-1	4	-50	-12	-2	-50	3	18	-50	-5	35	-50	28	75	0	45	58	0	3	18	-50	15	31	-50	18	47	0	10	28	-50	0	23	-50	37	55	-50	47	103	0
cac03	Randomly generated negative control	7	12	-50	10	99	-50	-1	49	-50	-6	101	0	9	163	0	11	81	0	-4	43	-50	4	45	-50	-6	46	-50	-4	-29	-50	-1	47	-50	-13	22	-50	-1	32	-50
cac05	Randomly generated negative control	-15	1	-50	-7	9	-50	-8	10	-50	-11	40	-50	-10	47	-50	-1	18	-50	-11	5	-50	-2	8	-50	-7	18	-50	-3	15	-50	-3	-5	-50	-31	-7	-50	22	83	0
cac07	Randomly generated negative control	-17	7	-50	-2	31	-50	-8	17	-50	-10	31	-50	-11	51	-50	-5	17	-50	-10	20	-50	-7	9	-50	-8	17	-50	-7	-5	-50	-1	12	-50	-34	-9	-50	-19	1	-50
cac09	Randomly generated negative control	-11	1	-50	0	17	-50	-7	21	-50	-13	35	-50	-1	54	-50	-3	14	-50	-7	23	-50	-10	17	-50	-10	-1	-50	-8	-2	-50	-1	9	-50	-11	11	-50	-16	7	-50
cac11	Randomly generated negative control	0	13	-50	4	-5	-50	3	31	-50	-9	31	-50	9	67	-50	20	47	0	10	28	-50	14	28	-50	15	32	-50	32	720	0	12	59	-50	2	35	-50	7	21	-50
cac01	Randomly generated negative control	2	9	-50	7	-18	-50	6	22	-50	-4	26	-50	13	70	-50	61	52	0	11	34	-50	13	42	-50	26	59	0	26	303	0	3	35	-50	28	41	-50	10	45	-50
cac03	Randomly generated negative control	-3	21	-50	10	110	-50	-4	36	-50	-7	36	-50	15	102	-50	17	31	-50	-3	43	-50	2	28	-50	-1	31	-50	-3	-18	-50	7	58	-50	-20	6	-50	56	113	0
cac05	Randomly generated negative control	-16	-4	-50	18	101	-50	-8	18	-50	-9	27	-50	-2	57	-50	3	4	-50	-9	11	-50	-4	10	-50	-9	20	-50	-7	-13	-50	-2	18	-50	-31	-7	-50	1	21	-50
cac07	Randomly generated negative control	-10	3	-50	21	101	-50	-9	12	-50	-10	27	-50	-3	61	-50	4	3	-50	-4	22	-50	-4	13	-50	-8	-2	-50	-2	10	-50	-2	-3	-50	121	136	0	6	26	-50
cac09	Randomly generated negative control	-10	0	-50	11	93	-50	-13	14	-50	-14	26	-50	-6	50	-50	-3	4	-50	-6	22	-50	-8	-2	-50	-10	3	-50	-8	2	-50	-7	-15	-50	-5	3	-50	-5	-2	-50
cac11	Randomly generated negative control	8	9	-50	34	101	-50	6	28	-50	-10	40	-50	6	77	-50	38	38	0	23	37	-50	28	46	0	18	41	-50	17	23	-50	4	10	-50	2	28	-50	37	68	0
cac01	Randomly generated negative control	5	6	-50	31	59	-50	12	38	-50	40	197	-50	15	83	-50	114	80	0	25	48	-50	22	69	0	35	92	0	21	351	0	1	29	-50	54	69	-50	25	83	-50
cac03	Randomly generated negative control	8	15	-50	28	133	-50	-6	33	-50	-12	36	-50	14	95	0	65	70	0	6	49	0	5	34	-50	-1	39	-50	2	-20	-50	3	17	-50	-10	9	-50	-6	21	-50
cac05	Randomly generated negative control	-11	-2	-50	20	46	-50	-16	5	-50	-19	11	-50	-2	40	-50	17	19	-50	-1	31	-50	3	30	-50	-9	17	-50	-8	-1	-50	27	101	-50	-22	9	-50	-16	11	-50
cac07	Randomly generated negative control	-5	12	-50	16	88	-50	-13	16	-50	-18	47	-50	-1	92	-50	9	51	0	1	22	-50	1	39	-50	-8	16	-50	-3	-5	-50	-4	3	-50	-29	2	-50	-18	8	-50
[truncated: 5,186 more rows]
